# Supplementary material for: Transcriptomic analysis of seed development in Paysonia auriculata (Brassicaceae) identifies genes involved in hydroxy fatty acid biosynthesis
Source: Front Plant Sci. 2023 Jan 13;13:1079146. doi: 10.3389/fpls.2022.1079146 (PMC9880434; doi:10.3389/fpls.2022.1079146)
Supplement: Supplementary file 3 [file Table_1.xlsx]

## Sheet: Sheet1
Supplementary File 1. Gene expression analysis by RNA-Seq. Expression values in FPKM are shown for stage average (by week). Statistical significance (log2-transformed fold-change [FC] and adjusted-p value [adj-P]) for each pairwise comparison is provided. The assembled transcripts were annotated with BlastX by searching against the NCBInr, UniProt and TAIR, with an E-value cut-off of 10e-6. Total…
SOM cluster#	Transcript ID	Average FPKM (DAP)				21 vs. 14 DAP		28 vs. 21 DAP		42 vs. 28 DAP		BlastX vs. UniProt				BlastX vs. NCBInr			BlastX vs. TAIR				Pfam	SignalP	TmHMM	EggNOG	KEGG	GO
		14	21	28	42	FC	adj-P	FC	adj-P	FC	adj-P	Best hit	%Identity	E-value	Description	Best hit	%Identity	E-value	Best hit	%Identity	E-value	Description
1	11903.c0.g1.i1	20.48	0	0	0.25	-7.60002	0.00018579	5.13e-15	1	1.97646	1																	GO:0000145,GO:0005575,GO:0005576,GO:0005618,GO:0005829,GO:0005856,GO:0005886,GO:0006810,GO:0006887,GO:0008150,GO:0009524,GO:0009987,GO:0016020,GO:0016192,GO:0030312,GO:0032940,GO:0032991,GO:0043226,GO:0043228,GO:0043229,GO:0043232,GO:0043234,GO:0044424,GO:0044444,GO:0044448,GO:0044464,GO:0044699,GO:0044763,GO:0044765,GO:0046903,GO:0051179,GO:0051234,GO:0099023,GO:1902578
1	13331.c0.g1.i2	95.37	3.66	0	0	-3.66527	0.0264855	-6.54893	0.0563431	0	1	DF287_ARATH	63.158	3.66e-19	Defensin-like protein 287	ESQ51030.1	67.5	5.12e-26	AT1G13609.1	63.158	5.02e-19	Defensin-like (DEFL) family protein				ENOG410XRBX	ath:AT2G40360`KO:K14824	GO:0000166,GO:0003674,GO:0003824,GO:0004672,GO:0004674,GO:0005488,GO:0005524,GO:0006464,GO:0006468,GO:0006793,GO:0006796,GO:0006807,GO:0008150,GO:0008152,GO:0009987,GO:0016301,GO:0016310,GO:0016740,GO:0016772,GO:0016773,GO:0017076,GO:0019538,GO:0030554,GO:0032553,GO:0032555,GO:0032559,GO:0035639,GO:0036094,GO:0036211,GO:0043167,GO:0043168,GO:0043170,GO:0043412,GO:0044237,GO:0044238,GO:0044260,GO:…
1	18452.c0.g1.i1	301.8	212.68	37.04	31.35	0.341718	1	-2.9766	0.00075796	-0.0667424	1					BAJ34348.1	89.474	7.68e-38	AT2G15960.1	78.205	1.98e-33	stress-induced protein				ENOG410Y65V	ath:ArthMp029
1	19942.c0.g1.i1	11.78	6.79	2.43	1.56	0.145731	1	-1.94974	0.0350512	-0.385991	1	ACR4L_ARATH	36.859	4.71e-48	Serine/threonine-protein kinase-like protein ACR4	OAO95472.1	90.39	0	AT5G46080.1	90.39	0	Protein kinase superfamily protein
1	2043.c0.g1.i1	7.75	0	0	0	-8.00362	1.86e-05	5.13e-15	1	0	1					OAP07855.1	79	2.5e-39										GO:0003674,GO:0003824,GO:0004351,GO:0005488,GO:0005515,GO:0005516,GO:0005575,GO:0005911,GO:0006082,GO:0006520,GO:0006536,GO:0006807,GO:0008150,GO:0008152,GO:0009064,GO:0009506,GO:0009987,GO:0016829,GO:0016830,GO:0016831,GO:0019752,GO:0019842,GO:0030054,GO:0030170,GO:0036094,GO:0043167,GO:0043168,GO:0043436,GO:0043648,GO:0044237,GO:0044238,GO:0044281,GO:0044699,GO:0044710,GO:0044763,GO:0048037,GO:…
1	21444.c0.g1.i1	27.48	0	0	0	-7.75711	0.000116497	5.13e-15	1	0	1	DEF47_ARATH	49.206	5.85e-14	Defensin-like protein 47	CDY67056.1	43.902	4.55e-13	AT3G16895.1	49.206	8e-14	Cysteine-rich protein						GO:0003674,GO:0003676,GO:0003723,GO:0003735,GO:0005198,GO:0005488,GO:0005575,GO:0005730,GO:0006412,GO:0006518,GO:0006807,GO:0008150,GO:0008152,GO:0009058,GO:0009059,GO:0009507,GO:0009536,GO:0009987,GO:0015934,GO:0019538,GO:0022613,GO:0022625,GO:0030529,GO:0032991,GO:0034641,GO:0034645,GO:0042254,GO:0043043,GO:0043170,GO:0043226,GO:0043227,GO:0043228,GO:0043229,GO:0043231,GO:0043232,GO:0043603,GO:…
1	22170.c0.g2.i1	28.47	2.78	3.79	10.99	-2.55193	0.0317562	-0.0481951	1	1.89095	1												PF01434.17
1	22184.c0.g1.i1	18.74	0	0	0	-7.03204	0.0127954	5.13e-15	1	0	1	DF110_ARATH	39.506	4.55e-13	Putative defensin-like protein 110	XP_019087792.1	46.914	7.37e-14	AT1G15757.1	39.506	6.22e-13	Molecular chaperone Hsp40/DnaJ family protein						GO:0003674,GO:0003676,GO:0003677,GO:0003824,GO:0003886,GO:0005488,GO:0005575,GO:0005634,GO:0005654,GO:0006139,GO:0006259,GO:0006304,GO:0006305,GO:0006306,GO:0006325,GO:0006464,GO:0006479,GO:0006725,GO:0006807,GO:0006950,GO:0006952,GO:0008150,GO:0008152,GO:0008168,GO:0008213,GO:0008757,GO:0009008,GO:0009605,GO:0009607,GO:0009620,GO:0009892,GO:0009987,GO:0010468,GO:0010605,GO:0010629,GO:0016043,GO:…
1	22756.c0.g1.i1	106.11	14	0.08	0.26	-2.01434	0.00450682	-7.38998	6.94e-12	1.52489	1	RLF33_ARATH	87.931	8.49e-68	Protein RALF-like 33	EFH46467.1	87.288	1.21e-65	AT4G15800.1	88.034	8.52e-68	ralf-like 33				COG0563	ath:AT4G25280`KO:K13800	GO:0003674,GO:0003824,GO:0004842,GO:0005488,GO:0005575,GO:0006508,GO:0006511,GO:0006807,GO:0008150,GO:0008152,GO:0009056,GO:0009057,GO:0009987,GO:0010498,GO:0016021,GO:0016740,GO:0019538,GO:0019787,GO:0019941,GO:0030163,GO:0031224,GO:0043161,GO:0043167,GO:0043169,GO:0043170,GO:0043632,GO:0044237,GO:0044238,GO:0044248,GO:0044260,GO:0044265,GO:0044425,GO:0046872,GO:0051603,GO:0061630,GO:0061659,GO:…
1	23186.c0.g1.i2	81.55	6.13	0.02	0.37	-3.00016	0.0397246	-8.03631	5.42e-09	3.80452	1	SWT10_ARATH	92.388	4.31e-173	Bidirectional sugar transporter SWEET10 {ECO:0000303|PubMed:21107422}	XP_010442345.1	93.426	6.82e-174	AT5G50790.1	92.414	3.98e-173	Nodulin MtN3 family protein				ENOG410YG6P	ath:AT5G26210	GO:0000166,GO:0003674,GO:0003824,GO:0004386,GO:0005488,GO:0005524,GO:0005575,GO:0005634,GO:0006935,GO:0007154,GO:0007275,GO:0008150,GO:0009553,GO:0009875,GO:0009987,GO:0010183,GO:0016462,GO:0016787,GO:0016817,GO:0016818,GO:0017076,GO:0017111,GO:0022414,GO:0030554,GO:0032501,GO:0032502,GO:0032553,GO:0032555,GO:0032559,GO:0035639,GO:0036094,GO:0040011,GO:0042330,GO:0043167,GO:0043168,GO:0043226,GO:…
1	23195.c0.g1.i1	32.42	0.07	0.08	0	-7.38937	4.33e-07	-0.298467	1	-1.77852	1					XP_020885943.1	55.34	3.46e-25	AT3G01325.1	50.495	4.94e-24	Expressed protein						GO:0000139,GO:0000166,GO:0002239,GO:0002376,GO:0003674,GO:0005488,GO:0005515,GO:0005524,GO:0005575,GO:0005789,GO:0005886,GO:0006950,GO:0006952,GO:0006955,GO:0007165,GO:0008150,GO:0009605,GO:0009607,GO:0009620,GO:0009814,GO:0009817,GO:0009987,GO:0016020,GO:0017076,GO:0019904,GO:0030275,GO:0030554,GO:0031090,GO:0032553,GO:0032555,GO:0032559,GO:0035639,GO:0036094,GO:0043167,GO:0043168,GO:0043207,GO:…
1	23664.c0.g1.i1	28.29	0.16	0.06	0	-6.51806	8.96e-10	-1.67934	1	-1.77656	1	Y5258_ARATH	96.296	1.31e-69	Stress-response A/B barrel domain-containing protein At5g22580 {ECO:0000305}	XP_010421054.1	97.222	5.51e-68	AT5G22580.1	96.296	1.8e-69	Stress responsive A/B Barrel Domain-containing protein	PF00550.24			COG5176	ath:AT5G51300`KO:K13095	GO:0003674,GO:0003824,GO:0005488,GO:0005575,GO:0005634,GO:0005911,GO:0008150,GO:0008168,GO:0008170,GO:0008276,GO:0008757,GO:0009292,GO:0009294,GO:0009506,GO:0009987,GO:0016278,GO:0016279,GO:0016740,GO:0016741,GO:0018024,GO:0030054,GO:0042054,GO:0043167,GO:0043169,GO:0043226,GO:0043227,GO:0043229,GO:0043231,GO:0044424,GO:0044464,GO:0044764,GO:0046872,GO:0051704
1	23665.c0.g1.i1	4.67	0	0	0.03	-8.78694	1.81e-05	5.13e-15	1	1.9767	1	KN14P_ARATH	88.773	0	Kinesin-like protein KIN-14P {ECO:0000305}	XP_010471464.1	91.06	0	AT1G73860.2	88.773	0	P-loop containing nucleoside triphosphate hydrolases superfamily protein				COG0318	ath:AT1G76290	GO:0003674,GO:0003676,GO:0003723,GO:0003824,GO:0004518,GO:0004519,GO:0005488,GO:0005575,GO:0006139,GO:0006725,GO:0006807,GO:0008150,GO:0008152,GO:0009451,GO:0009507,GO:0009536,GO:0009987,GO:0016070,GO:0016787,GO:0016788,GO:0034641,GO:0043170,GO:0043226,GO:0043227,GO:0043229,GO:0043231,GO:0043412,GO:0044237,GO:0044238,GO:0044260,GO:0044424,GO:0044444,GO:0044464,GO:0046483,GO:0071704,GO:0090304,GO:…
1	23772.c0.g1.i1	50.21	1.02	0.83	2.18	-4.60642	8.55e-05	-0.70891	1	1.3825	1	GRP23_ARATH	90.196	3.5e-25	Glycine-rich protein 23 {ECO:0000303|PubMed:18657431}	XP_023639642.1	86.441	1.56e-26	AT2G32690.4	90.196	2.41e-25	glycine-rich protein 23
1	23875.c0.g2.i1	6.2	1.77	0.07	0.44	-0.880488	1	-4.743	0.00318106	2.43659	1															ENOG410XQGS	ath:AT4G12020
1	24248.c0.g1.i1	8.83	0	0	0	-6.47195	0.0217948	5.13e-15	1	0	1	DEF80_ARATH	43.59	1.36e-14	Putative defensin-like protein 80	ESQ32397.1	66.25	2.61e-22	AT2G25295.1	43.59	1.86e-14	low-molecular-weight cysteine-rich 81	PF00232.17					GO:0003674,GO:0003824,GO:0004843,GO:0005575,GO:0005634,GO:0005737,GO:0005829,GO:0006464,GO:0006508,GO:0006511,GO:0006807,GO:0007165,GO:0008150,GO:0008152,GO:0008233,GO:0008234,GO:0009056,GO:0009057,GO:0009755,GO:0009867,GO:0009987,GO:0016579,GO:0016787,GO:0019538,GO:0019783,GO:0019941,GO:0036211,GO:0036459,GO:0043170,GO:0043226,GO:0043227,GO:0043229,GO:0043231,GO:0043412,GO:0043632,GO:0044237,GO:…
1	24292.c0.g1.i1	43.46	0	0	0	-7.68761	0.000113537	5.13e-15	1	0	1	DF102_ARATH	35.484	3.68e-07	Putative defensin-like protein 102				AT4G08028.1	35.484	5.01e-07	Molecular chaperone Hsp40/DnaJ family protein						GO:0003674,GO:0003824,GO:0004553,GO:0004564,GO:0005575,GO:0005829,GO:0005975,GO:0008150,GO:0008152,GO:0016787,GO:0016798,GO:0033926,GO:0044238,GO:0044424,GO:0044444,GO:0044464,GO:0071704
1	24534.c0.g1.i1	30.29	1.11	1.78	1.54	-3.83918	5.07e-07	0.101754	1	0.0593187	1					XP_010496690.1	87.317	5.13e-130	AT1G02180.1	83.838	1.73e-122	ferredoxin-like protein	PF07553.10			ENOG410YN4N	ath:AT3G22400`KO:K15718	GO:0000166,GO:0003674,GO:0003824,GO:0003973,GO:0005488,GO:0005575,GO:0005576,GO:0005634,GO:0005777,GO:0005840,GO:0005911,GO:0006950,GO:0006952,GO:0008150,GO:0008152,GO:0008891,GO:0009058,GO:0009506,GO:0009507,GO:0009532,GO:0009536,GO:0009570,GO:0009605,GO:0009607,GO:0009617,GO:0009719,GO:0009725,GO:0009735,GO:0009854,GO:0009987,GO:0010033,GO:0010181,GO:0016020,GO:0016491,GO:0016614,GO:0016899,GO:…
1	24573.c0.g1.i1	19.82	0.52	0.83	0.31	-4.18092	0.00324721	0.117874	1	-1.18032	1	NLTP_VIGUN	48.101	8.72e-21	Probable non-specific lipid-transfer protein AKCS9	XP_013725610.1	65.714	2.22e-44	AT5G38197.1	56.731	5.75e-31	Bifunctional inhibitor/lipid-transfer protein/seed storage 2S albumin superfamily protein
1	24859.c0.g1.i1	195.94	0.34	0	0	-7.9873	1.72e-12	-3.71164	1	0	1	DF187_ARATH	55.357	1.45e-07	Putative defensin-like protein 187				AT3G23165.1	56.14	6.59e-08	low-molecular-weight cysteine-rich 42	PF00063.20					GO:0000166,GO:0003674,GO:0003824,GO:0005488,GO:0005524,GO:0005575,GO:0005654,GO:0005730,GO:0005794,GO:0005829,GO:0005856,GO:0005886,GO:0006810,GO:0007049,GO:0008104,GO:0008150,GO:0009524,GO:0009893,GO:0009894,GO:0009896,GO:0009987,GO:0010035,GO:0010038,GO:0010604,GO:0015031,GO:0015833,GO:0016020,GO:0016787,GO:0017076,GO:0019222,GO:0030554,GO:0032553,GO:0032555,GO:0032559,GO:0033036,GO:0035639,GO:…
1	24906.c0.g1.i1	55.77	4.12	0	0.05	-2.86674	4.85e-05	-8.1815	2.16e-08	1.97666	1	21KD_DAUCA	39.153	4.37e-30	21 kDa protein	EFH69528.1	86.7	1.77e-112	AT1G23205.1	85.714	7.38e-113	Plant invertase/pectin methylesterase inhibitor superfamily protein						GO:0000166,GO:0003674,GO:0003824,GO:0004103,GO:0005488,GO:0005524,GO:0006950,GO:0008150,GO:0009611,GO:0016301,GO:0016740,GO:0016772,GO:0016773,GO:0017076,GO:0030554,GO:0032553,GO:0032555,GO:0032559,GO:0035639,GO:0036094,GO:0043167,GO:0043168,GO:0050896,GO:0097159,GO:0097367,GO:1901265,GO:1901363
1	24924.c0.g1.i1	13.81	0.17	0.09	0	-5.26757	4.36e-05	-1.11455	1	-1.77853	1					BAB08815.1	71.014	1.23e-17	AT5G63500.1	71.429	5.72e-20	transmembrane protein putative (DUF 3339)						GO:0003674,GO:0003824,GO:0005575,GO:0006464,GO:0006807,GO:0008150,GO:0008152,GO:0009249,GO:0009507,GO:0009536,GO:0009987,GO:0016740,GO:0016746,GO:0016747,GO:0018065,GO:0019538,GO:0033819,GO:0036211,GO:0043170,GO:0043226,GO:0043227,GO:0043229,GO:0043231,GO:0043412,GO:0044237,GO:0044238,GO:0044260,GO:0044267,GO:0044424,GO:0044444,GO:0044464,GO:0071704,GO:1901564
1	24937.c0.g1.i1	9.95	0	0	0	-6.31269	0.0330832	5.13e-15	1	0	1	DEF47_ARATH	43.373	4.53e-13	Defensin-like protein 47	EFH55142.1	51.25	1.5e-17	AT3G16895.1	43.373	6.19e-13	Cysteine-rich protein				COG0724		GO:0000302,GO:0003674,GO:0003824,GO:0003993,GO:0004601,GO:0005488,GO:0005575,GO:0005576,GO:0006873,GO:0006950,GO:0006979,GO:0008150,GO:0009986,GO:0009987,GO:0010035,GO:0016209,GO:0016491,GO:0016684,GO:0016787,GO:0016788,GO:0016791,GO:0019725,GO:0030002,GO:0030320,GO:0030643,GO:0042221,GO:0042542,GO:0042578,GO:0042592,GO:0043167,GO:0043169,GO:0044464,GO:0044699,GO:0044763,GO:0046872,GO:0048878,GO:…
1	2496.c0.g1.i1	1472.89	304.17	2	1.86	-1.52122	0.150327	-7.63051	9.91e-18	0.0114004	1					XP_010418242.1	93.548	1.25e-08	AT1G62500.1	87.097	7.46e-10	Bifunctional inhibitor/lipid-transfer protein/seed storage 2S albumin superfamily protein	PF07910.12
1	24971.c0.g1.i1	215.15	22.61	11.39	14.41	-2.38985	0.00316555	-1.44879	0.38549	0.528284	1					XP_019090247.1	88.136	8.76e-10	AT5G02550.1	83.607	2.03e-10	hypothetical protein
1	25017.c0.g1.i1	57.49	0	0	0	-8.15238	7.17e-05	5.13e-15	1	0	1					XP_023637630.1	52.632	1.85e-15	AT3G48205.2	50	1.38e-11	plant thionin family protein				ENOG41121N2	ath:AT2G25410	GO:0001101,GO:0003674,GO:0005215,GO:0005575,GO:0006810,GO:0006857,GO:0006950,GO:0006952,GO:0006970,GO:0006972,GO:0008150,GO:0009605,GO:0009607,GO:0009611,GO:0009617,GO:0009628,GO:0009651,GO:0009719,GO:0009725,GO:0009737,GO:0009751,GO:0009753,GO:0010033,GO:0010243,GO:0014070,GO:0015197,GO:0015198,GO:0015833,GO:0016020,GO:0016021,GO:0022857,GO:0022892,GO:0031224,GO:0033993,GO:0042221,GO:0042538,GO:…
1	25093.c0.g1.i1	6.11	0	0	0	-5.98945	0.0491731	5.13e-15	1	0	1	NLT2P_WHEAT	46.032	8.2e-14	Non-specific lipid-transfer protein 2P	XP_010450660.1	54.651	4.11e-24	AT1G07747.1	47.727	3.83e-22	Bifunctional inhibitor/lipid-transfer protein/seed storage 2S albumin superfamily protein						GO:0000278,GO:0000712,GO:0003674,GO:0003676,GO:0003677,GO:0003824,GO:0003916,GO:0003917,GO:0005488,GO:0005575,GO:0005634,GO:0005694,GO:0006139,GO:0006259,GO:0006265,GO:0006281,GO:0006725,GO:0006807,GO:0006950,GO:0006974,GO:0006996,GO:0007049,GO:0007059,GO:0008150,GO:0008152,GO:0008270,GO:0009987,GO:0016043,GO:0016853,GO:0022402,GO:0022414,GO:0033554,GO:0034641,GO:0043167,GO:0043169,GO:0043170,GO:…
1	25103.c0.g1.i1	62.34	32.64	7.75	2.93	0.0348795	1	-2.68518	1.8e-05	-1.16453	1					XP_010483718.1	83.636	1.07e-88	AT5G60680.1	84.242	4.39e-77	transcription initiation factor TFIID subunit (Protein of unknown function DUF584)	PF13334.5			COG0060	ath:AT4G10320`KO:K01870
1	25166.c0.g1.i1	23.43	0.23	0.04	0.04	-5.65586	0.00410129	-2.61264	1	0.191812	1
1	25192.c0.g1.i1	11.82	0	0	0.12	-7.85099	1.57e-05	5.13e-15	1	1.97686	1								AT1G19960.1	84.615	5.95e-07	transcription factor	PF10396.8			COG0484	osa:4336584`KO:K09503	GO:0005575,GO:0005773,GO:0005789,GO:0006508,GO:0006624,GO:0006807,GO:0006810,GO:0006890,GO:0008104,GO:0008150,GO:0008152,GO:0009987,GO:0015031,GO:0015833,GO:0016020,GO:0016192,GO:0016485,GO:0019538,GO:0033036,GO:0042886,GO:0043170,GO:0043226,GO:0043227,GO:0043229,GO:0043231,GO:0044237,GO:0044238,GO:0044260,GO:0044267,GO:0044422,GO:0044424,GO:0044425,GO:0044432,GO:0044444,GO:0044446,GO:0044464,GO:…
1	25194.c0.g1.i1	243.02	0.13	0.56	0	-9.37325	3.93e-06	1.32409	1	-3.42194	1	ALL9_OLEEU	50.617	2.35e-21	Glucan endo-1,3-beta-D-glucosidase	XP_010500533.1	78.182	6.64e-50	AT4G09465.1	77.273	2.92e-51	Carbohydrate-binding X8 domain superfamily protein			ExpAA=137.56^PredHel=6^Topology=i407-426o436-458i479-501o511-533i546-565o633-655i	COG1131	ath:AT1G71960
1	25276.c0.g1.i1	21.33	0	0.61	0	-6.31715	0.0165004	1.72399	1	-1.77618	1					EFH49778.1	100	2.33e-09	AT5G11550.1	96.552	5.74e-11	ARM repeat superfamily protein			ExpAA=43.31^PredHel=2^Topology=i20-37o69-91i			GO:0003674,GO:0003676,GO:0003824,GO:0004518,GO:0004519,GO:0004521,GO:0004523,GO:0004540,GO:0005488,GO:0016787,GO:0016788,GO:0016891,GO:0016893,GO:0043167,GO:0043169,GO:0046872,GO:0097159,GO:1901363
1	25292.c0.g1.i1	277.98	0	0.34	0	-11.5841	1.3e-13	2.48788	1	-2.54957	1	DF295_ARATH	61.468	3.7e-42	Defensin-like protein 295	XP_018438720.1	74.312	5.48e-48	AT2G04045.1	61.468	5.08e-42	Defensin-like (DEFL) family protein	PF13768.5			ENOG411183H	ath:AT5G04530`KO:K15397	GO:0000166,GO:0003674,GO:0003824,GO:0004637,GO:0005488,GO:0005524,GO:0005575,GO:0006139,GO:0006144,GO:0006163,GO:0006164,GO:0006188,GO:0006189,GO:0006725,GO:0006753,GO:0006793,GO:0006796,GO:0006807,GO:0008150,GO:0008152,GO:0009058,GO:0009112,GO:0009113,GO:0009117,GO:0009123,GO:0009124,GO:0009126,GO:0009127,GO:0009150,GO:0009152,GO:0009156,GO:0009161,GO:0009165,GO:0009167,GO:0009168,GO:0009259,GO:…
1	25326.c0.g1.i1	25.7	2.53	3.4	2.61	-2.45529	0.000204606	-0.127173	1	-0.0970306	1					EOA35133.1	89.556	0	AT1G64650.1	89.111	0	Major facilitator superfamily protein
1	25333.c0.g1.i2	6.34	0.03	0.03	0.08	-6.45548	7.6e-06	-0.436425	1	1.56221	1	CDA6_ARATH	62.791	2.93e-132	Cytidine deaminase 6	AAC69566.1	63.123	3.93e-131	AT4G29610.1	62.791	4.05e-132	Cytidine/deoxycytidylate deaminase family protein			ExpAA=59.05^PredHel=3^Topology=i126-145o155-172i185-207o			GO:0002229,GO:0002239,GO:0003674,GO:0003824,GO:0005575,GO:0005777,GO:0005975,GO:0006082,GO:0006139,GO:0006725,GO:0006732,GO:0006733,GO:0006739,GO:0006753,GO:0006793,GO:0006796,GO:0006807,GO:0006950,GO:0006952,GO:0008150,GO:0008152,GO:0009051,GO:0009117,GO:0009507,GO:0009532,GO:0009536,GO:0009570,GO:0009605,GO:0009607,GO:0009617,GO:0009987,GO:0016787,GO:0016788,GO:0017057,GO:0019362,GO:0019637,GO:…
1	25392.c0.g1.i1	56.92	8.08	44.94	39.02	-1.8937	0.0117657	1.85959	0.00427611	0.079336	1	RPS1_ARATH	98.684	0	30S ribosomal protein S1, chloroplastic {ECO:0000305}	XP_022568432.1	98.158	0	AT5G30510.1	98.684	0	ribosomal protein S1
1	25439.c0.g1.i1	30.23	0.3	0.35	0.71	-5.69622	1.12e-10	-0.335909	1	1.15865	1	Y5848_ARATH	57.396	3.35e-37	Uncharacterized protein At5g48480	ESQ32461.1	67.081	2.19e-46	AT5G48480.1	57.647	3.38e-37	Lactoylglutathione lyase / glyoxalase I family protein	PF01582.19					GO:0001071,GO:0003674,GO:0003676,GO:0003677,GO:0003700,GO:0005488,GO:0005515,GO:0005575,GO:0005634,GO:0005737,GO:0006139,GO:0006351,GO:0006355,GO:0006725,GO:0006807,GO:0008150,GO:0008152,GO:0009058,GO:0009059,GO:0009889,GO:0009987,GO:0010468,GO:0010556,GO:0016070,GO:0018130,GO:0019219,GO:0019222,GO:0019438,GO:0031323,GO:0031326,GO:0032774,GO:0034641,GO:0034645,GO:0034654,GO:0042802,GO:0042803,GO:…
1	25496.c0.g1.i2	10.08	1.53	0	0.15	-1.88931	0.148882	-7.10204	0.000919429	3.66894	1					XP_018468980.1	96.825	3.28e-72	AT4G27435.1	95.238	5.2e-74	fiber (DUF1218)	PF01370.20					GO:0005575,GO:0005829,GO:0006996,GO:0008150,GO:0009657,GO:0009658,GO:0009902,GO:0009903,GO:0009904,GO:0009987,GO:0016043,GO:0019750,GO:0044424,GO:0044444,GO:0044464,GO:0051179,GO:0051234,GO:0051640,GO:0051641,GO:0051644,GO:0051649,GO:0051656,GO:0051667,GO:0071840
1	25530.c0.g1.i1	31.29	0.34	0.16	0.26	-5.58611	0.000263855	-1.52182	1	0.795721	1					OAO95156.1	76.224	1.12e-45	AT5G20790.1	74.825	6.27e-46	transmembrane protein						GO:0003674,GO:0003735,GO:0005198,GO:0005575,GO:0005840,GO:0006412,GO:0006518,GO:0006807,GO:0008150,GO:0008152,GO:0009058,GO:0009059,GO:0009987,GO:0019538,GO:0030529,GO:0032991,GO:0034641,GO:0034645,GO:0043043,GO:0043170,GO:0043226,GO:0043228,GO:0043229,GO:0043232,GO:0043603,GO:0043604,GO:0044237,GO:0044238,GO:0044249,GO:0044260,GO:0044267,GO:0044271,GO:0044424,GO:0044444,GO:0044464,GO:0071704,GO:…
1	25634.c0.g2.i1	19.15	0	0	0	-8.01448	0.000188573	5.13e-15	1	0	1	DF298_ARATH	66	1.1e-37	Putative defensin-like protein 298	EFH55090.1	62.745	1.79e-35	AT2G25185.1	66	1.51e-37	Defensin-like (DEFL) family protein
1	25650.c0.g1.i1	19.3	0	0	0	-7.75462	0.00017165	5.13e-15	1	0	1	DEF06_ARATH	85.484	1.93e-22	Defensin-like protein 6	Q9FFP8.1	85.484	3.21e-20	AT5G63660.1	85.484	2.64e-22	Scorpion toxin-like knottin superfamily protein
1	25698.c0.g1.i1	37.31	1.92	0.25	0.29	-3.43884	0.00639327	-2.9608	0.624044	0.194344	1					CDY34621.1	91.892	2.81e-14	AT1G11850.3	86.486	1.69e-08	transmembrane protein	PF03168.12
1	25751.c0.g2.i1	172.75	58.02	2.75	2.45	-0.777235	1	-4.8804	2.06e-11	0.0391767	1					EOA36270.1	78.351	8.4e-34	AT1G22065.1	86.301	3.25e-27	hypothetical protein				ENOG410XQUQ	ath:AT4G28080`KO:K03255
1	25755.c0.g1.i1	9.37	0	0	0	-7.30698	0.0012821	5.13e-15	1	0	1	DF283_ARATH	64.356	2.2e-29	Putative defensin-like protein 283	Q2L6T1.1	64.356	3.67e-27	AT5G56369.1	64.706	2.2e-29	Defensin-like (DEFL) family protein	PF00977.20
1	25766.c0.g1.i1	10.56	0.52	0	0	-3.34823	0.000923846	-4.98698	0.195698	0	1					XP_010473133.1	86.667	8.74e-80	AT2G27385.2	81.618	1.65e-77	Pollen Ole e 1 allergen and extensin family protein				COG3158	ath:AT4G19960`KO:K03549
1	25840.c0.g1.i2	14.69	0.91	0.45	0.45	-3.18719	3.14e-05	-1.48379	0.429889	0.233263	1	SUVH5_ARATH	74.635	0	Histone-lysine N-methyltransferase, H3 lysine-9 specific SUVH5	EFH55793.1	76.14	0	AT2G35160.5	74.681	0	SU(VAR)3-9 homolog 5
1	25843.c0.g1.i1	78.57	12.94	0.45	0.42	-1.6625	0.379332	-5.27742	7.17e-05	0.256058	1														ExpAA=50.69^PredHel=3^Topology=i13-32o36-55i76-98o			GO:0000184,GO:0000428,GO:0000956,GO:0003674,GO:0003676,GO:0003723,GO:0003824,GO:0004647,GO:0004721,GO:0004722,GO:0005488,GO:0005575,GO:0005634,GO:0006139,GO:0006351,GO:0006355,GO:0006357,GO:0006401,GO:0006402,GO:0006464,GO:0006470,GO:0006725,GO:0006793,GO:0006796,GO:0006807,GO:0006950,GO:0006970,GO:0007165,GO:0007275,GO:0008150,GO:0008152,GO:0008420,GO:0009056,GO:0009057,GO:0009058,GO:0009059,GO:…
1	25853.c0.g2.i1	115.56	0	0	0	-9.58241	1.4e-05	5.13e-15	1	0	1	DF123_ARATH	55.769	1.74e-15	Defensin-like protein 123	ESQ44694.1	62.5	4.7e-20	AT3G43505.1	52.703	1.79e-13	low-molecular-weight cysteine-rich 30				COG2124	ath:AT1G57750`KO:K15405
1	25869.c0.g1.i1	8.47	0.16	0.06	0.08	-4.62288	0.00129963	-1.81656	1	0.547873	1	P2A08_ARATH	38.333	8.71e-29	Protein PHLOEM PROTEIN 2-LIKE A8	XP_013595109.1	60.784	3.6e-63	AT4G23515.2	46.091	3.39e-46	Toll-Interleukin-Resistance (TIR) domain family protein	PF04515.11
1	25883.c1.g1.i1	16.83	12.72	3.49	3.1	0.49406	1	-2.36086	0.00235676	0.0650784	1	EF4L2_ARATH	94.215	1.93e-76	Protein ELF4-LIKE 2	XP_010416016.1	93.443	1.62e-74	AT1G72630.1	94.262	1.94e-76	ELF4-like 2
1	25911.c0.g1.i1	258.84	0.12	0.12	0	-9.66046	1.99e-10	-0.43437	1	-1.77853	1					EOA32072.1	42.045	4.48e-10								COG1024	ath:AT5G65940`KO:K05605
1	26103.c0.g1.i1	34.84	0	0.11	0.12	-9.45151	5.86e-11	1.72528	1	0.191792	1	CPC_ARATH	68.75	1.21e-31	Transcription factor CPC	EFH54658.1	83.133	2.82e-41	AT2G46410.1	68.75	1.66e-31	Homeodomain-like superfamily protein	PF00782.19			COG0596	ath:AT2G15230
1	26131.c0.g1.i2	60.8	0	0	0	-9.64942	1.42e-06	5.13e-15	1	0	1					KFK32780.1	80.303	4.7e-30	AT2G22942.1	68.116	3.54e-26	growth factor				COG1022	ath:AT2G04350`KO:K01897
1	26134.c0.g1.i1	13.52	0.07	1.67	2.33	-6.61192	5.67e-10	3.90269	0.0146626	0.734679	1	PMI11_ARATH	37.981	2.73e-41	Pectinesterase inhibitor 11 {ECO:0000305}	XP_006305566.2	87.317	1.02e-129	AT1G14890.1	86.603	4.27e-129	Plant invertase/pectin methylesterase inhibitor superfamily protein
1	26168.c0.g1.i1	9.2	0	0	0	-5.98323	0.0420724	5.13e-15	1	0	1	DEF49_ARATH	40.278	1.92e-15	Defensin-like protein 49	EFH55142.1	48.611	1.16e-17	AT5G19172.1	40.278	2.62e-15	Cysteine-rich protein			ExpAA=47.67^PredHel=1^Topology=i5-27o	COG0515	ath:AT3G55950	GO:0000151,GO:0000152,GO:0003674,GO:0003824,GO:0004842,GO:0005488,GO:0005575,GO:0005680,GO:0006508,GO:0006511,GO:0006807,GO:0008150,GO:0008152,GO:0008270,GO:0009056,GO:0009057,GO:0009987,GO:0010498,GO:0016021,GO:0016740,GO:0019538,GO:0019787,GO:0019941,GO:0030163,GO:0031224,GO:0031461,GO:0032991,GO:0043161,GO:0043167,GO:0043169,GO:0043170,GO:0043632,GO:0044237,GO:0044238,GO:0044248,GO:0044260,GO:…
1	26216.c0.g1.i1	902.32	406.33	161.59	102.54	-0.233141	1	-1.92062	0.0012757	-0.431738	1	CYT5_ARATH	77.551	5.43e-46	Cysteine proteinase inhibitor 5	KFK41155.1	79.825	9.45e-51	AT5G47550.1	77.551	7.48e-46	Cystatin/monellin superfamily protein
1	26234.c0.g1.i2	8.44	0.63	0.6	0.59	-2.83373	0.0270935	-0.554589	1	0.127864	1	CML44_ARATH	84.615	3.88e-87	Probable calcium-binding protein CML44	Q9LPK5.2	84.615	6.47e-85	AT1G21550.1	84.713	3.9e-87	Calcium-binding EF-hand family protein					ath:ArthMp011
1	26254.c0.g1.i1	391.16	0	0.29	0.33	-12.2566	6.56e-13	2.49036	1	0.229613	1	DF313_ARATH	81.25	1.45e-21	Defensin-like protein 313	XP_018438095.1	81.69	5.16e-29	AT5G40155.1	81.25	1.99e-21	Defensin-like (DEFL) family protein	PF00134.22			COG0615	ath:AT2G32260`KO:K00968	GO:0000166,GO:0001882,GO:0001883,GO:0003674,GO:0005488,GO:0005525,GO:0005575,GO:0005737,GO:0017076,GO:0019001,GO:0032549,GO:0032550,GO:0032553,GO:0032555,GO:0032561,GO:0035639,GO:0036094,GO:0043167,GO:0043168,GO:0043169,GO:0044424,GO:0044464,GO:0046872,GO:0097159,GO:0097367,GO:1901265,GO:1901363
1	26295.c0.g1.i1	61.44	0.92	0.07	0.08	-5.13342	0.000190768	-3.71821	0.147816	0.191813	1
1	26365.c0.g1.i2	124.94	33.03	8.67	6.52	-1.08951	0.753088	-2.38284	0.0102389	-0.246086	1					EOA33029.1	76.316	2.05e-23	AT2G17710.1	72.222	1.69e-21	Big1				ENOG410Z7Q5	ath:AT5G57880	GO:0000166,GO:0003674,GO:0005488,GO:0005524,GO:0005575,GO:0005634,GO:0005829,GO:0006950,GO:0006952,GO:0007165,GO:0008150,GO:0009987,GO:0010075,GO:0010082,GO:0017076,GO:0030554,GO:0032553,GO:0032555,GO:0032559,GO:0035639,GO:0036094,GO:0040008,GO:0043167,GO:0043168,GO:0043226,GO:0043227,GO:0043229,GO:0043231,GO:0043531,GO:0044424,GO:0044444,GO:0044464,GO:0048509,GO:0048638,GO:0050789,GO:0050793,GO:…
1	26396.c0.g1.i3	55.49	10.22	5.11	4.37	-1.56996	0.0468456	-1.53991	0.0559852	0.00852671	1					EOA14054.1	88.764	3.4e-80	AT5G45590.1	87.931	9.13e-76	Ribosomal protein L35
1	26448.c0.g1.i1	67.11	1.05	3.17	0	-4.80751	0.00100401	0.951758	1	-3.04976	1					XP_019087242.1	96.296	7e-10								COG0476	ath:AT4G24940`KO:K10684
1	26456.c0.g1.i1	29.2	2.86	0	0	-2.31477	0.196809	-7.28099	0.00215837	0	1					XP_010418500.1	83.761	8.94e-51	AT1G64370.1	65.517	3.86e-45	filaggrin-like protein						GO:0001101,GO:0001676,GO:0003674,GO:0003824,GO:0004497,GO:0005488,GO:0005506,GO:0005575,GO:0005739,GO:0006082,GO:0006629,GO:0006631,GO:0006633,GO:0006690,GO:0006950,GO:0006952,GO:0008150,GO:0008152,GO:0008202,GO:0008610,GO:0009058,GO:0009507,GO:0009526,GO:0009534,GO:0009535,GO:0009536,GO:0009579,GO:0009605,GO:0009607,GO:0009611,GO:0009620,GO:0009694,GO:0009695,GO:0009719,GO:0009725,GO:0009753,GO:…
1	26518.c0.g1.i1	446.19	47.77	0.3	0.12	-2.30679	0.145815	-7.62278	5.17e-08	-0.969691	1	PER50_ARATH	92.131	0	Peroxidase 50	XP_010432051.1	93.77	0	AT4G37520.1	92.157	0	Peroxidase superfamily protein						GO:0000166,GO:0000808,GO:0003674,GO:0003676,GO:0003677,GO:0003688,GO:0003690,GO:0005488,GO:0005524,GO:0005575,GO:0005664,GO:0006139,GO:0006259,GO:0006270,GO:0006725,GO:0006807,GO:0008150,GO:0008152,GO:0009987,GO:0017076,GO:0030554,GO:0032553,GO:0032555,GO:0032559,GO:0032991,GO:0034641,GO:0035639,GO:0036094,GO:0043167,GO:0043168,GO:0043170,GO:0043234,GO:0043565,GO:0044237,GO:0044238,GO:0044260,GO:…
1	26592.c0.g1.i1	25.08	3.04	5.36	3.72	-2.14051	0.0482472	0.255086	1	-0.289577	1	AUL1_ARATH	67.368	8.12e-23	Auxilin-like protein 1	XP_023643083.1	75.258	2.34e-28	AT1G75310.2	67.368	1.1e-22	auxin-like 1 protein
1	26600.c0.g1.i1	8.44	0	0	0	-6.59962	0.0046182	5.13e-15	1	0	1	DF293_ARATH	40.566	1.29e-16	Defensin-like protein 293	XP_019102062.1	40.952	4.02e-16	AT2G04925.1	41.121	1.29e-16	Putative membrane lipoprotein	PF00078.26					GO:0005575,GO:0005911,GO:0009506,GO:0016021,GO:0030054,GO:0031224,GO:0044425
1	26628.c0.g1.i1	33.09	0	0.07	0.22	-9.64017	2.52e-06	1.72399	1	1.56218	1					AEC07045.2	75	1.71e-19	AT2G20618.1	75	1.41e-21	Plant thionin family protein			ExpAA=22.37^PredHel=1^Topology=i13-35o
1	26630.c0.g1.i1	17.08	1.71	0	0.06	-2.35444	0.00249754	-6.75564	8.39e-05	1.97686	1	UBC29_ARATH	96.622	1.85e-105	Ubiquitin-conjugating enzyme E2 29	ESQ50851.1	97.973	1.07e-104	AT2G16740.1	96.644	8.75e-106	ubiquitin-conjugating enzyme 29				ENOG41122Q1	ath:AT2G23930`KO:K11099	GO:0000139,GO:0003674,GO:0003824,GO:0003827,GO:0005488,GO:0005575,GO:0005768,GO:0005794,GO:0005802,GO:0006464,GO:0006486,GO:0006491,GO:0006807,GO:0006950,GO:0006970,GO:0006972,GO:0008150,GO:0008152,GO:0008194,GO:0008375,GO:0009100,GO:0009628,GO:0009987,GO:0016020,GO:0016021,GO:0016262,GO:0016740,GO:0016757,GO:0016758,GO:0019538,GO:0031090,GO:0031224,GO:0031410,GO:0031982,GO:0031984,GO:0036211,GO:…
1	26632.c0.g1.i1	13.26	0	0	0	-8.12791	4.68e-05	5.13e-15	1	0	1					XP_009135814.1	77.931	2.5e-71	AT3G22540.1	91.892	4.45e-70	hypothetical protein (DUF1677)				ENOG410XUEB	ath:AT3G52115`KO:K13096	GO:0003674,GO:0003824,GO:0004838,GO:0005488,GO:0005575,GO:0005829,GO:0006082,GO:0006520,GO:0006558,GO:0006559,GO:0006570,GO:0006572,GO:0006725,GO:0006807,GO:0008150,GO:0008152,GO:0008483,GO:0009056,GO:0009058,GO:0009063,GO:0009072,GO:0009074,GO:0009987,GO:0016054,GO:0016740,GO:0016769,GO:0019439,GO:0019752,GO:0019842,GO:0030170,GO:0036094,GO:0043167,GO:0043168,GO:0043436,GO:0044237,GO:0044238,GO:…
1	26650.c0.g1.i1	49.83	0	0.17	0	-9.26463	6.39e-06	1.72436	1	-1.77669	1	DEF51_ARATH	40	1.52e-15	Defensin-like protein 51	XP_002879146.2	39.506	5.19e-14	AT3G48231.1	40	2.09e-15	low-molecular-weight cysteine-rich 48				COG0183	ath:AT5G48230`KO:K00626	GO:0003674,GO:0003676,GO:0003824,GO:0003964,GO:0004175,GO:0004190,GO:0004518,GO:0004519,GO:0005488,GO:0006139,GO:0006259,GO:0006310,GO:0006725,GO:0006807,GO:0008150,GO:0008152,GO:0008233,GO:0009987,GO:0015074,GO:0016740,GO:0016772,GO:0016779,GO:0016787,GO:0016788,GO:0034061,GO:0034641,GO:0043167,GO:0043169,GO:0043170,GO:0044237,GO:0044238,GO:0044260,GO:0046483,GO:0046872,GO:0070001,GO:0070011,GO:…
1	26678.c0.g1.i3	6.25	0	0	0	-6.74505	0.0125207	5.13e-15	1	0	1																	GO:0000151,GO:0000160,GO:0005575,GO:0005634,GO:0006464,GO:0006508,GO:0006511,GO:0006807,GO:0007165,GO:0008150,GO:0008152,GO:0009056,GO:0009057,GO:0009719,GO:0009723,GO:0009725,GO:0009755,GO:0009873,GO:0009966,GO:0009968,GO:0009987,GO:0010033,GO:0010104,GO:0010105,GO:0010646,GO:0010648,GO:0016567,GO:0019005,GO:0019538,GO:0019941,GO:0023051,GO:0023057,GO:0031461,GO:0032446,GO:0032991,GO:0035556,GO:…
1	26700.c0.g1.i1	59.02	0	0	0	-9.63447	7.52e-07	5.13e-15	1	0	1	DEF49_ARATH	48	6.9e-14	Defensin-like protein 49	XP_010492971.1	48.235	7.27e-16	AT5G19172.1	48	9.43e-14	Cysteine-rich protein				ENOG410XYY6	ath:AT5G41040`KO:K15400
1	26744.c0.g1.i1	17.85	2	7.14	7.83	-2.22015	0.0125678	1.24816	0.502506	0.401355	1					XP_010498009.1	93.75	3.1e-71	AT1G16790.1	91.034	8.18e-68	ribosomal protein-like protein				ENOG410Z9I2	ath:AT3G17010
1	26749.c0.g1.i1	121.1	11.12	0.42	0.23	-2.54265	0.00985054	-5.11712	2.33e-08	-0.6346	1								AT4G12580.2	68.367	2.66e-08	hypothetical protein	PF13976.5			ENOG410XQTV	ath:AT1G63500`KO:K14500
1	26756.c0.g1.i1	78.77	12.95	1.04	1.15	-1.81386	0.0358053	-4.0914	2.99e-07	0.369273	1	EXOL3_ARATH	96.215	0	Protein EXORDIUM-like 3	XP_019095716.1	96.53	0	AT5G51550.1	96.226	0	EXORDIUM like 3
1	26778.c0.g1.i3	517.75	1.59	0.18	0.5	-7.48951	7.6e-21	-3.44189	0.00769991	1.51092	1	PST2_ARATH	86.792	7.03e-45	Photosystem II 5 kDa protein, chloroplastic	ANM65448.1	77.372	3.23e-50	AT3G21055.2	77.536	4.96e-52	photosystem II subunit T
1	26813.c0.g1.i2	178.88	50.3	0.26	0.13	-1.01937	0.723087	-7.86322	1.57e-11	-0.644172	1					EOA24814.1	85.535	2.49e-94	AT3G54040.1	80.247	1.99e-91	PAR1 protein	PF02687.20
1	26814.c0.g1.i1	26.36	0.47	0.18	0.18	-4.79096	1.06e-07	-1.69265	1	0.267688	1					EFH56622.1	88.172	1.89e-29	AT2G21185.1	89.362	1.3e-31	transmembrane protein				COG0750	ath:AT5G35210
1	26829.c0.g1.i2	190.46	46.99	1.82	2.11	-1.13689	0.582217	-5.08022	2.24e-07	0.377323	1					KFK32228.1	79.07	4.43e-37	AT4G05070.1	83.146	6.32e-36	Wound-responsive family protein
1	26874.c0.g1.i1	5.51	0	0	0	-6.31515	0.04031	5.13e-15	1	0	1	PCC1_ARATH	80.392	1.85e-23	Cysteine-rich and transmembrane domain-containing protein PCC1	XP_010511117.1	89.474	2.22e-29	AT3G22240.1	89.474	2.25e-30	cysteine-rich/transmembrane domain PCC1-like protein				COG5184	ath:AT5G63860	GO:0000302,GO:0003674,GO:0003824,GO:0003993,GO:0004601,GO:0005488,GO:0005575,GO:0005576,GO:0006873,GO:0006950,GO:0006979,GO:0008150,GO:0009986,GO:0009987,GO:0010035,GO:0016209,GO:0016491,GO:0016684,GO:0016787,GO:0016788,GO:0016791,GO:0019725,GO:0030002,GO:0030320,GO:0030643,GO:0042221,GO:0042542,GO:0042578,GO:0042592,GO:0043167,GO:0043169,GO:0044464,GO:0044699,GO:0044763,GO:0046872,GO:0048878,GO:…
1	26874.c0.g2.i1	168.88	17.72	0.62	0.39	-2.4522	0.0442695	-5.16505	0.000181133	-0.505019	1	PCC1_ARATH	77.358	6.67e-21	Cysteine-rich and transmembrane domain-containing protein PCC1	XP_010466499.1	84.746	8.83e-26	AT3G22240.1	83.051	1.02e-26	cysteine-rich/transmembrane domain PCC1-like protein
1	26875.c0.g2.i1	14.92	0.03	0	0	-7.29482	0.0482237	-2.22227	1	0	1	HSP57_ARATH	35.178	5.83e-30	Putative 57 kDa heat shock protein {ECO:0000305}	XP_010445347.1	50.379	5.06e-72	AT4G16545.1	52.107	1.44e-73	heat shock protein HSP20/alpha crystallin family protein						GO:0000139,GO:0000271,GO:0003674,GO:0003824,GO:0005575,GO:0005794,GO:0005886,GO:0005975,GO:0005976,GO:0006073,GO:0008150,GO:0008152,GO:0008194,GO:0009058,GO:0009059,GO:0009250,GO:0009832,GO:0009833,GO:0009987,GO:0016020,GO:0016021,GO:0016043,GO:0016051,GO:0016740,GO:0016757,GO:0016758,GO:0016759,GO:0016760,GO:0022402,GO:0030243,GO:0030244,GO:0031090,GO:0031224,GO:0033692,GO:0034637,GO:0034645,GO:…
1	26910.c0.g1.i4	12.74	0	0.09	0	-7.99195	0.000167942	1.72526	1	-1.77853	1					ESQ29718.1	63	3.51e-40	AT1G56415.1	40.625	4.75e-14	Expressed protein				ENOG410YN6X	ath:AT4G34410	GO:0000156,GO:0000160,GO:0001071,GO:0003674,GO:0003676,GO:0003677,GO:0003700,GO:0004871,GO:0005488,GO:0005575,GO:0005634,GO:0006139,GO:0006351,GO:0006725,GO:0006807,GO:0007165,GO:0007568,GO:0008150,GO:0008152,GO:0009058,GO:0009059,GO:0009719,GO:0009723,GO:0009725,GO:0009735,GO:0009736,GO:0009755,GO:0009873,GO:0009987,GO:0010033,GO:0010075,GO:0010082,GO:0010119,GO:0010150,GO:0016070,GO:0018130,GO:…
1	26927.c0.g1.i1	81.4	13.88	0.9	1.57	-1.69963	0.033075	-4.44231	9.25e-09	1.0051	1	CSPLB_ARALL	93.846	2.15e-129	CASP-like protein 2A1	XP_010459293.1	94.359	1.98e-134	AT1G17200.1	94.359	1.68e-128	Uncharacterized protein family (UPF0497)	PF14364.5			ENOG4111K3C	ath:AT3G19810
1	26952.c0.g1.i2	5.92	1.48	0.05	0.05	-0.928096	1	-4.8272	0.00687411	0.233484	1	CAR2_ARATH	86.207	4.89e-96	Protein C2-DOMAIN ABA-RELATED 2 {ECO:0000303|PubMed:25465408}	EFH63284.1	92.262	3.03e-98	AT1G66360.1	86.286	4.75e-96	Calcium-dependent lipid-binding (CaLB domain) family protein						GO:0000139,GO:0003674,GO:0005215,GO:0005575,GO:0005794,GO:0006810,GO:0008150,GO:0008643,GO:0015291,GO:0015297,GO:0015780,GO:0015931,GO:0016020,GO:0016021,GO:0022804,GO:0022857,GO:0031090,GO:0031224,GO:0036079,GO:0043226,GO:0043227,GO:0043229,GO:0043231,GO:0044422,GO:0044424,GO:0044425,GO:0044431,GO:0044444,GO:0044446,GO:0044464,GO:0044699,GO:0044765,GO:0051179,GO:0051234,GO:0055085,GO:0071702,GO:…
1	27022.c0.g1.i1	72.01	9.49	7.74	7.99	-2.05935	0.00805868	-0.833434	0.774496	0.287606	1	ATP5E_ARATH	100	5.24e-37	ATP synthase subunit epsilon, mitochondrial	Q96253.3	100	8.74e-35	AT1G51650.1	100	7.19e-37	ATP synthase epsilon chain
1	27047.c0.g1.i1	397.74	10.28	60.52	72.49	-4.35761	9.14e-09	1.95888	0.0428822	0.444379	1
1	27059.c0.g1.i2	6.97	2.78	0.29	0.34	-0.486831	1	-3.72819	0.00175687	0.543455	1	GDPD2_ARATH	93.191	3.35e-147	Glycerophosphodiester phosphodiesterase GDPD2 {ECO:0000305}	XP_010436048.1	93.191	1.4e-145	AT5G41080.1	93.191	4.63e-147	PLC-like phosphodiesterases superfamily protein
1	27066.c0.g1.i2	59.11	7.78	7.24	6.1	-2.03577	0.00243497	-0.628305	1	0.00041036	1	RK31_ARATH	84.962	4.63e-79	50S ribosomal protein L31, chloroplastic	EFH63847.1	87.218	8.04e-79	AT1G75350.1	84.962	6.39e-79	Ribosomal protein L31	PF00069.24
1	27099.c0.g1.i1	14.74	1.36	0.52	0.28	-2.58097	0.000864154	-1.82814	0.276703	-0.613589	1	RNH2A_ARATH	93.581	0	Ribonuclease H2 subunit A	EFH56911.1	93.919	0	AT2G25100.1	93.603	0	Polynucleotidyl transferase ribonuclease H-like superfamily protein
1	27101.c0.g2.i1	49.94	0.75	0.2	0.33	-5.16905	1.01e-08	-2.22433	0.691905	0.795722	1					AAM63768.1	89.241	9.48e-93	AT3G50685.1	88.679	2.95e-94	anti-muellerian hormone type-2 receptor						GO:0003006,GO:0003674,GO:0005488,GO:0005515,GO:0005575,GO:0005634,GO:0005681,GO:0006139,GO:0006396,GO:0006397,GO:0006725,GO:0006807,GO:0007275,GO:0008150,GO:0008152,GO:0008380,GO:0009790,GO:0009793,GO:0009987,GO:0016070,GO:0016071,GO:0016604,GO:0016607,GO:0022414,GO:0030529,GO:0032501,GO:0032502,GO:0032991,GO:0034641,GO:0043170,GO:0043226,GO:0043227,GO:0043229,GO:0043231,GO:0044237,GO:0044238,GO:…
1	27168.c0.g1.i3	438.89	11.77	2.72	3.79	-4.22396	0.000213011	-2.69032	0.0159769	0.61671	1	KIN2_ARATH	87.879	6.5e-19	Stress-induced protein KIN2	XP_019090628.1	89.394	6.03e-17	AT5G15970.1	88.06	6.49e-19	stress-responsive protein (KIN2) / stress-induced protein (KIN2) / cold-responsive protein (COR6.6) / cold-regulated protein (COR6.6)
1	27172.c0.g1.i1	6.63	0	0	0	-6.0326	0.0260364	5.13e-15	1	0	1	DEF08_ARATH	43.396	6.05e-13	Defensin-like protein 8	EFH51376.1	44.444	4.18e-12	AT2G02147.1	43.396	8.28e-13	low-molecular-weight cysteine-rich 73						GO:0000295,GO:0003674,GO:0005215,GO:0005337,GO:0005346,GO:0005575,GO:0005739,GO:0005743,GO:0006810,GO:0006811,GO:0006820,GO:0006839,GO:0006862,GO:0008150,GO:0008509,GO:0008514,GO:0015075,GO:0015211,GO:0015215,GO:0015216,GO:0015228,GO:0015605,GO:0015711,GO:0015748,GO:0015865,GO:0015868,GO:0015880,GO:0015931,GO:0015932,GO:0016020,GO:0016021,GO:0019866,GO:0022857,GO:0022891,GO:0022892,GO:0031090,GO:…
1	27172.c0.g3.i1	10.69	0	0.11	0	-7.46631	0.000339113	1.72529	1	-1.77851	1	DEF08_ARATH	49.333	8.09e-22	Defensin-like protein 8	EFH51376.1	52.632	5.28e-21	AT2G02147.1	49.333	1.11e-21	low-molecular-weight cysteine-rich 73	PF04782.11					GO:0003674,GO:0003676,GO:0003824,GO:0003964,GO:0004175,GO:0004190,GO:0004518,GO:0004519,GO:0005488,GO:0006139,GO:0006259,GO:0006310,GO:0006725,GO:0006807,GO:0008150,GO:0008152,GO:0008233,GO:0009987,GO:0015074,GO:0016740,GO:0016772,GO:0016779,GO:0016787,GO:0016788,GO:0034061,GO:0034641,GO:0043167,GO:0043169,GO:0043170,GO:0044237,GO:0044238,GO:0044260,GO:0046483,GO:0046872,GO:0070001,GO:0070011,GO:…
1	27173.c1.g1.i1	40.04	0	0	0	-8.67895	1.5e-05	5.13e-15	1	0	1	DF301_ARATH	51.515	8.91e-18	Defensin-like protein 301	CDY11281.1	53.684	2.13e-26	AT5G04045.1	51.515	1.22e-17	Putative membrane lipoprotein	PF02362.20					GO:0000166,GO:0002376,GO:0003674,GO:0005488,GO:0005515,GO:0005524,GO:0005575,GO:0005737,GO:0006950,GO:0006952,GO:0006955,GO:0007165,GO:0008150,GO:0008219,GO:0009626,GO:0009987,GO:0012501,GO:0017076,GO:0030554,GO:0032553,GO:0032555,GO:0032559,GO:0033554,GO:0034050,GO:0035639,GO:0036094,GO:0043167,GO:0043168,GO:0043531,GO:0044424,GO:0044464,GO:0044699,GO:0044763,GO:0045087,GO:0050789,GO:0050794,GO:…
1	27173.c1.g2.i1	124.51	0	0.17	0	-10.3673	1.32e-07	1.72555	1	-1.77847	1	DF301_ARATH	44	3.53e-09	Defensin-like protein 301	XP_019094919.1	43.836	3.86e-11	AT5G04045.1	44.737	3.53e-09	Putative membrane lipoprotein				COG4886	ath:AT1G59780
1	27175.c0.g1.i1	19.85	8.2	0.41	0.07	-0.338217	1	-4.6593	0.000533203	-1.99554	1	CSPLH_ARALL	67.742	1.67e-66	CASP-like protein 4B1	EOA27953.1	67.097	3.52e-66	AT2G38480.1	65.806	1.17e-63	Uncharacterized protein family (UPF0497)						GO:0003674,GO:0005488,GO:0005515,GO:0005575,GO:0005635,GO:0006996,GO:0006997,GO:0008150,GO:0009504,GO:0009987,GO:0016020,GO:0016021,GO:0016043,GO:0031090,GO:0031224,GO:0031965,GO:0031967,GO:0031975,GO:0044422,GO:0044424,GO:0044425,GO:0044428,GO:0044444,GO:0044446,GO:0044464,GO:0046982,GO:0046983,GO:0071840
1	27204.c0.g3.i1	13.97	0	0	0	-6.87376	0.0120488	5.13e-15	1	0	1	DEF51_ARATH	63.75	3.89e-19	Defensin-like protein 51	P82763.1	63.75	6.49e-17	AT3G48231.1	64.198	3.16e-19	low-molecular-weight cysteine-rich 48						GO:0005575,GO:0005739,GO:0043226,GO:0043227,GO:0043229,GO:0043231,GO:0044424,GO:0044444,GO:0044464
1	27209.c0.g1.i1	11.85	0.05	0.07	0.12	-6.67959	0.00273883	-0.310004	1	1.0177	1					EFH41323.1	74.107	1.07e-46	AT5G66490.1	72.727	6.48e-46	hypothetical protein
1	27212.c0.g1.i1	21.65	0.88	0	0	-3.73084	0.000664819	-4.97613	0.152828	0	1					CAB39613.1	95.522	1.84e-38	AT4G09890.1	95.588	1.11e-40	mediator of RNA polymerase II transcription subunit putative (DUF3511)			ExpAA=132.01^PredHel=5^Topology=o209-231i252-274o294-316i336-358o412-434i	COG5594	ath:AT1G11960`KO:K21989
1	27214.c0.g1.i1	15.89	0.82	9.48	11.79	-3.33572	0.00561962	2.92085	0.0369797	0.519042	1	RAF1_ARATH	91.333	1.16e-66	Rubisco accumulation factor 1.1, chloroplastic {ECO:0000303|PubMed:22942379}	EFH48572.1	93.333	3.8e-69	AT5G28500.1	91.333	1.58e-66	rubisco accumulation factor-like protein
1	27219.c0.g1.i1	26.41	2.34	11.46	9.72	-2.52447	0.0218392	1.65078	0.321256	0.0184758	1	ZDP_ARATH	89.773	1.74e-42	Polynucleotide 3'-phosphatase ZDP	XP_023641106.1	92.941	5.91e-50	AT3G14890.2	89.773	2.1e-42	phosphoesterase
1	27240.c0.g1.i1	28.28	0	0	0	-8.47362	8.21e-06	5.13e-15	1	0	1	DF285_ARATH	56.604	5.16e-15	Defensin-like protein 285	EOA36391.1	54.054	2.35e-20	AT5G44973.1	56.604	7.06e-15	defensin-like protein	PF12698.6					GO:0000139,GO:0003674,GO:0003824,GO:0005575,GO:0005774,GO:0005829,GO:0006629,GO:0006643,GO:0006644,GO:0006664,GO:0006793,GO:0006796,GO:0006810,GO:0006886,GO:0006950,GO:0007154,GO:0008104,GO:0008150,GO:0008152,GO:0008195,GO:0008610,GO:0008654,GO:0009058,GO:0009247,GO:0009267,GO:0009605,GO:0009705,GO:0009987,GO:0009991,GO:0015031,GO:0015833,GO:0016020,GO:0016036,GO:0016787,GO:0016788,GO:0016791,GO:…
1	27305.c0.g1.i2	12.28	0	0	0.1	-8.15937	6.8e-05	5.13e-15	1	1.97021	1					XP_010454409.1	94.118	1.17e-63	AT5G20935.1	89.216	6.15e-62	DUF3148 family protein						GO:0003674,GO:0003824,GO:0004721,GO:0004725,GO:0005575,GO:0005737,GO:0016787,GO:0016788,GO:0016791,GO:0042578,GO:0044424,GO:0044464
1	27310.c0.g1.i1	80.78	11.7	10.51	6.37	-1.8543	0.0193151	-0.673756	1	-0.457814	1
1	27311.c0.g1.i1	14.14	4.72	0.16	0.48	-0.462034	1	-5.29224	0.0164242	1.50727	1	ZIP4_ARATH	97.778	1.17e-90	Zinc transporter 4, chloroplastic	XP_010458477.1	99.259	5.65e-89	AT1G10970.2	97.794	9.22e-91	zinc transporter	PF00005.26					GO:0003674,GO:0003824,GO:0004721,GO:0005488,GO:0005575,GO:0006464,GO:0006470,GO:0006793,GO:0006796,GO:0006807,GO:0008150,GO:0008152,GO:0009314,GO:0009416,GO:0009507,GO:0009532,GO:0009536,GO:0009570,GO:0009628,GO:0009668,GO:0009987,GO:0010027,GO:0016043,GO:0016311,GO:0016787,GO:0016788,GO:0016791,GO:0019538,GO:0035970,GO:0036211,GO:0042578,GO:0043167,GO:0043169,GO:0043170,GO:0043226,GO:0043227,GO:…
1	27313.c0.g1.i4	31.32	5.12	1.47	1.37	-1.75245	0.0239136	-2.26684	0.0247897	0.104058	1	CRL_ARATH	86.842	4.7e-11	Chromophore lyase CRL, chloroplastic	BAB08747.1	88.462	9.09e-79	AT5G51010.1	88.535	2.09e-81	Rubredoxin-like superfamily protein				ENOG410XPC9	ath:AT1G64390
1	27316.c0.g1.i1	47.76	5.1	4.04	3.44	-2.36752	0.00100933	-0.847065	1	0.0347771	1	RK35_ARATH	87.586	1.03e-69	50S ribosomal protein L35, chloroplastic {ECO:0000305}	XP_010417152.1	90.345	3.86e-77	AT2G24090.1	87.671	6.04e-70	Ribosomal protein L35	PF00106.24
1	27323.c0.g1.i2	16.33	0.26	4.01	3.17	-4.80441	0.00285603	3.03343	0.689202	-0.0431008	1					KFK35529.1	91.964	9.86e-68	AT1G54310.2	89.286	5.55e-68	S-adenosyl-L-methionine-dependent methyltransferases superfamily protein	PF00069.24		ExpAA=44.89^PredHel=2^Topology=o216-238i259-281o	COG5594	ath:AT1G62320`KO:K21989
1	27333.c0.g1.i2	16.1	7.16	1.47	2.23	-0.291538	1	-2.75298	0.00320584	0.813122	1					EFH58412.1	61.871	3.08e-49	AT3G01980.6	60.432	9.15e-51	NAD(P)-binding Rossmann-fold superfamily protein
1	27354.c0.g1.i1	908.63	0	0.22	0.49	-14.1484	6.69e-32	2.49024	1	1.11828	1					ESQ54196.1	90.826	6.43e-67	AT4G30880.1	90	3.1e-68	Bifunctional inhibitor/lipid-transfer protein/seed storage 2S albumin superfamily protein
1	27394.c0.g1.i2	39.22	1.81	0.54	0.27	-3.57255	6.12e-06	-2.1898	0.0884322	-0.693975	1					AAM60869.1	88.034	7.36e-179	AT1G67590.1	88.352	0	Remorin family protein
1	27408.c0.g3.i1	108.85	16.59	3.29	1.81	-1.85277	0.160742	-2.76638	0.0264905	-0.659943	1	BLH10_ARATH	80.576	5.64e-55	BEL1-like homeodomain protein 10	EOA40106.1	90.58	4.67e-60	AT1G19700.5	80.714	5.65e-55	BEL1-like homeodomain 10
1	27414.c0.g1.i1	196.71	16.94	3.94	5.47	-2.69274	0.00750633	-2.56696	0.0601861	0.761504	1	ADK1_ARATH	97.222	9.75e-72	Adenosine kinase 1	ESQ49087.1	99.083	2.23e-71	AT3G09820.1	97.222	1.34e-71	adenosine kinase 1
1	27434.c0.g1.i1	24.04	9.98	0.04	0.08	-0.425856	1	-7.81239	1.79e-05	1.01642	1	IBH1_ARATH	78.616	3.69e-69	Transcription factor IBH1	EOA27995.1	80	5.86e-73	AT2G43060.1	78.75	3.71e-69	ILI1 binding bHLH 1						GO:0003674,GO:0005488,GO:0005515,GO:0005575,GO:0005737,GO:0005759,GO:0006457,GO:0006458,GO:0006950,GO:0006986,GO:0008150,GO:0009507,GO:0009526,GO:0009532,GO:0009536,GO:0009570,GO:0009941,GO:0009987,GO:0010033,GO:0019904,GO:0031967,GO:0031974,GO:0031975,GO:0035966,GO:0042221,GO:0043167,GO:0043169,GO:0043226,GO:0043227,GO:0043229,GO:0043231,GO:0043233,GO:0044422,GO:0044424,GO:0044429,GO:0044434,GO:…
1	27437.c0.g1.i1	278.28	15.78	0.28	0.46	-3.35981	0.00446588	-6.05085	6.78e-05	0.796452	1					AAM65764.1	89.157	4.79e-46	AT5G66985.1	89.286	3.39e-48	hypothetical protein				ENOG410XPJ0	ath:AT1G79000`KO:K04498	GO:0000166,GO:0003674,GO:0003824,GO:0004672,GO:0004674,GO:0005488,GO:0005524,GO:0005575,GO:0005634,GO:0005829,GO:0006464,GO:0006468,GO:0006793,GO:0006796,GO:0006807,GO:0008150,GO:0008152,GO:0009719,GO:0009725,GO:0009741,GO:0009987,GO:0010033,GO:0014070,GO:0016301,GO:0016310,GO:0016740,GO:0016772,GO:0016773,GO:0017076,GO:0019538,GO:0030554,GO:0032553,GO:0032555,GO:0032559,GO:0033993,GO:0035639,GO:…
1	27452.c0.g1.i4	441.83	0.81	0.87	1.22	-8.15086	2.54e-20	-0.392019	1	0.655017	1	CB4A_SOLLC	86.667	6.72e-84	Chlorophyll a-b binding protein CP24 10A, chloroplastic	XP_022542921.1	98.519	7.09e-94	AT1G15820.1	94.853	3.21e-90	light harvesting complex photosystem II subunit 6						GO:0006464,GO:0006807,GO:0008150,GO:0008152,GO:0009987,GO:0016567,GO:0019538,GO:0032446,GO:0036211,GO:0043170,GO:0043412,GO:0044237,GO:0044238,GO:0044260,GO:0044267,GO:0070647,GO:0071704,GO:1901564
1	27455.c0.g1.i1	10.69	0	0.08	0	-8.42491	0.000257546	1.72434	1	-1.77611	1																	GO:0000166,GO:0001882,GO:0001883,GO:0003674,GO:0003676,GO:0003723,GO:0003824,GO:0003924,GO:0005488,GO:0005515,GO:0005525,GO:0005575,GO:0005786,GO:0006461,GO:0006605,GO:0006612,GO:0006613,GO:0006614,GO:0006810,GO:0006886,GO:0008104,GO:0008150,GO:0008312,GO:0009507,GO:0009532,GO:0009536,GO:0009570,GO:0009987,GO:0015031,GO:0015833,GO:0016043,GO:0016462,GO:0016787,GO:0016817,GO:0016818,GO:0017076,GO:…
1	27488.c0.g1.i1	8.31	0.09	0	0.2	-5.3303	0.000258692	-2.02737	1	2.79719	1	TRXH1_ARATH	91.228	5.92e-75	Thioredoxin H1	XP_010426645.1	89.683	5.3e-78	AT3G51030.1	91.304	5.94e-75	thioredoxin H-type 1						GO:0003674,GO:0003824,GO:0004175,GO:0004190,GO:0005575,GO:0006807,GO:0006950,GO:0006952,GO:0008150,GO:0008152,GO:0008233,GO:0009056,GO:0009057,GO:0009605,GO:0009607,GO:0009620,GO:0016021,GO:0016787,GO:0019538,GO:0030163,GO:0031224,GO:0043170,GO:0043207,GO:0044238,GO:0044425,GO:0050832,GO:0050896,GO:0051704,GO:0051707,GO:0070001,GO:0070011,GO:0071704,GO:0098542,GO:1901564,GO:1901565,GO:1901575
1	27495.c0.g1.i1	6.68	0	0	0.05	-7.98005	5.03e-06	5.13e-15	1	2.01312	1	NLTL5_ARATH	56.471	1.31e-29	Non-specific lipid-transfer protein-like protein At5g64080	XP_010452912.1	56.383	2.78e-46	AT5G64080.2	56.471	1.49e-29	Bifunctional inhibitor/lipid-transfer protein/seed storage 2S albumin superfamily protein						GO:0003674,GO:0003824,GO:0004842,GO:0006464,GO:0006807,GO:0008150,GO:0008152,GO:0009987,GO:0016567,GO:0016740,GO:0019538,GO:0019787,GO:0032446,GO:0036211,GO:0043170,GO:0043412,GO:0044237,GO:0044238,GO:0044260,GO:0044267,GO:0070647,GO:0071704,GO:1901564
1	27515.c0.g1.i2	28.12	11.53	2.98	2.49	-0.462818	1	-2.43297	0.00355238	-0.0524286	1	FKB13_ARATH	85.096	5.63e-129	Peptidyl-prolyl cis-trans isomerase FKBP13, chloroplastic {ECO:0000303|PubMed:12424338}	XP_010481544.1	88.038	4.44e-129	AT5G45680.1	85.167	7.28e-129	FK506-binding protein 13
1	27519.c0.g1.i1	87.93	0	0	0.2	-9.80303	3e-07	5.13e-15	1	1.97696	1					EOA33083.1	54.762	4.71e-18	AT2G04622.1	56.098	8.95e-20	transmembrane protein				COG2267	ath:AT1G52760`KO:K18368
1	27545.c0.g1.i2	11.84	0.61	1.23	1.1	-3.38958	0.0012821	0.487182	1	0.0980309	1
1	27546.c0.g1.i1	17.46	8.58	1.87	3.68	-0.151734	1	-2.67176	0.0194873	1.16107	1	ACCA_ARATH	91.398	1.87e-53	Acetyl-coenzyme A carboxylase carboxyl transferase subunit alpha, chloroplastic	EFH55983.1	92.473	8.64e-52	AT2G38040.2	91.398	2.52e-53	acetyl Co-enzyme a carboxylase carboxyltransferase alpha subunit						GO:0000166,GO:0003674,GO:0005488,GO:0005575,GO:0005886,GO:0006950,GO:0008150,GO:0016020,GO:0016208,GO:0017076,GO:0030554,GO:0032553,GO:0032555,GO:0032559,GO:0036094,GO:0043167,GO:0043168,GO:0043169,GO:0044464,GO:0050896,GO:0097159,GO:0097367,GO:1901265,GO:1901363
1	27564.c0.g1.i1	13.34	0	0	0	-8.91133	1.55e-08	5.13e-15	1	0	1	LBP65_ARATH	84.906	8.77e-60	Putative lipid-binding protein At4g00165	OAP01005.1	84.906	1.34e-57	AT4G00165.2	85.047	8.8e-60	Bifunctional inhibitor/lipid-transfer protein/seed storage 2S albumin superfamily protein						GO:0003674,GO:0005215,GO:0005575,GO:0006810,GO:0008150,GO:0016020,GO:0022857,GO:0051179,GO:0051234,GO:0055085
1	27592.c0.g1.i1	894.8	0.27	1.11	0.32	-10.2343	1.24e-12	1.34116	1	-1.44421	1	DEF50_ARATH	53.165	1.44e-21	Defensin-like protein 50	P82764.1	53.165	2.41e-19	AT2G33233.1	53.165	1.98e-21	low-molecular-weight cysteine-rich 49
1	27605.c0.g1.i1	36.33	0.42	0.15	0.25	-5.26546	6.33e-05	-1.85144	1	0.742796	1					EFH69430.1	84.848	5.22e-30	AT1G21520.1	84.615	2.44e-30	hypothetical protein				COG0545	ath:AT3G25230`KO:K09571	GO:0005575,GO:0005634,GO:0043226,GO:0043227,GO:0043229,GO:0043231,GO:0044424,GO:0044464
1	27617.c0.g1.i1	16.37	0.06	0.06	0	-6.78942	2.68e-08	-0.308791	1	-1.77846	1	E131_ARATH	51.648	1.84e-26	Glucan endo-1,3-beta-glucosidase 1	XP_010440766.1	82.456	2.15e-62	AT5G35740.1	92.857	2.03e-62	Carbohydrate-binding X8 domain superfamily protein						GO:0005575,GO:0005829,GO:0008150,GO:0008152,GO:0009653,GO:0009850,GO:0009987,GO:0010015,GO:0010035,GO:0010038,GO:0010101,GO:0010102,GO:0010249,GO:0010817,GO:0032502,GO:0042221,GO:0042445,GO:0044237,GO:0044424,GO:0044444,GO:0044464,GO:0044699,GO:0044767,GO:0048364,GO:0048856,GO:0050896,GO:0065007,GO:0065008,GO:0090697,GO:0090698,GO:0099402,GO:1905392
1	27621.c1.g1.i1	12.64	0.38	0.06	0.16	-4.16742	1.34e-06	-3.01555	0.0653665	1.58769	1	MCM3_ARATH	87.773	0	DNA replication licensing factor MCM3	XP_010481469.1	89.833	0	AT5G46280.1	87.789	0	Minichromosome maintenance (MCM2/3/5) family protein
1	27634.c0.g1.i2	146.95	4.8	1.17	0.85	-4.23532	0.000707594	-2.40473	0.282628	-0.26539	1	SCP35_ARATH	88.732	3.68e-38	Serine carboxypeptidase-like 35	XP_010491452.1	90	8.18e-38	AT5G08260.1	88.732	4.96e-38	serine carboxypeptidase-like 35
1	27643.c0.g1.i2	33.59	1.1	0	0	-3.8255	0.000803612	-3.70168	1	0	1	SSG1_ARATH	94.175	2.66e-62	Granule-bound starch synthase 1, chloroplastic/amyloplastic {ECO:0000303|PubMed:15347792}	AAL10494.1	94.175	2.65e-62	AT1G32900.1	94.175	3.61e-62	UDP-Glycosyltransferase superfamily protein	PF01527.19
1	27645.c0.g1.i2	8.33	0	0	0.08	-7.85064	8.16e-06	5.13e-15	1	2.01357	1					XP_020886122.1	83.784	1.93e-57	AT3G02120.1	69.355	3.85e-52	hydroxyproline-rich glycoprotein family protein						GO:0000160,GO:0000975,GO:0001067,GO:0001071,GO:0003674,GO:0003676,GO:0003677,GO:0003700,GO:0005488,GO:0005575,GO:0005634,GO:0006139,GO:0006351,GO:0006725,GO:0006807,GO:0007165,GO:0008150,GO:0008152,GO:0009058,GO:0009059,GO:0009755,GO:0009873,GO:0009987,GO:0016070,GO:0018130,GO:0019438,GO:0032774,GO:0034641,GO:0034645,GO:0034654,GO:0035556,GO:0043170,GO:0043226,GO:0043227,GO:0043229,GO:0043231,GO:…
1	27675.c0.g1.i1	17.52	0	0	0.04	-9.88803	9.38e-12	5.13e-15	1	1.97012	1	NFYB9_ARATH	82.573	3.44e-124	Nuclear transcription factor Y subunit B-9	Q9SFD8.2	82.573	5.74e-122	AT1G21970.1	82.645	5.43e-124	Histone superfamily protein				ENOG4111X07	ath:AT3G25770`KO:K10525
1	27682.c0.g1.i1	115.07	41.08	15.96	15.34	-0.600518	1	-1.86419	0.0219161	0.204511	1					XP_010440761.1	86.869	7.36e-52	AT5G35732.1	81.818	1.25e-52	hypothetical protein
1	27683.c0.g1.i1	26.3	2.27	1.42	0.79	-2.61675	0.0350031	-1.08916	1	-0.557194	1					EFH66362.1	94.04	2.59e-100	AT1G15410.2	93.377	2.01e-101	aspartate-glutamate racemase family
1	27700.c0.g1.i1	23.49	1.86	1.08	0.71	-2.75457	0.000310228	-1.28941	0.576761	-0.40144	1	ATL79_ARATH	81.548	2.84e-68	RING-H2 finger protein ATL79	Q9FGJ6.1	81.548	4.73e-66	AT5G47610.1	81.657	1.2e-68	RING/U-box superfamily protein				ENOG410YP6W	ath:AT4G10955	GO:0003674,GO:0005215,GO:0005575,GO:0005886,GO:0016020,GO:0016021,GO:0022857,GO:0031224,GO:0044425,GO:0044464
1	27708.c0.g1.i1	11.48	0.36	0.13	0	-3.91797	0.00497901	-1.60707	1	-1.77637	1					XP_010467731.1	93.182	9e-23	AT2G18910.1	88.889	2.93e-23	hydroxyproline-rich glycoprotein family protein						GO:0000959,GO:0005575,GO:0005739,GO:0006139,GO:0006396,GO:0006397,GO:0006725,GO:0006807,GO:0008150,GO:0008152,GO:0009451,GO:0009987,GO:0016070,GO:0016071,GO:0016556,GO:0034641,GO:0043170,GO:0043226,GO:0043227,GO:0043229,GO:0043231,GO:0043412,GO:0044237,GO:0044238,GO:0044260,GO:0044424,GO:0044444,GO:0044464,GO:0046483,GO:0071704,GO:0080156,GO:0090304,GO:1900864,GO:1901360
1	27709.c0.g1.i1	185.64	5.81	0.26	0.11	-3.97366	0.000158467	-4.89262	0.000143655	-0.932206	1	CML41_ARATH	84.058	1.43e-101	Probable calcium-binding protein CML41	XP_010426619.1	86.207	3.8e-101	AT3G50770.1	84.058	1.98e-101	calmodulin-like 41
1	27714.c0.g1.i2	8.62	0	0	0.08	-8.8789	3.17e-08	5.13e-15	1	2.77784	1					OAP03089.1	95.918	1.17e-21	AT3G55240.1	91.837	1.46e-22	Plant protein 1589 of unknown function						GO:0005575,GO:0005886,GO:0005911,GO:0006950,GO:0006952,GO:0008150,GO:0009506,GO:0009605,GO:0009607,GO:0009617,GO:0016020,GO:0016021,GO:0030054,GO:0031224,GO:0042742,GO:0043207,GO:0044425,GO:0044464,GO:0050896,GO:0051704,GO:0051707,GO:0098542
1	27714.c0.g2.i1	39.13	0.14	0	0	-6.95426	7.77e-10	-2.22567	1	0	1					XP_018481293.1	90.698	1.68e-37	AT3G55240.1	90.698	5.74e-38	Plant protein 1589 of unknown function	PF05691.11			ENOG410Z7Z7	ath:AT1G06710	GO:0000151,GO:0003006,GO:0003674,GO:0003676,GO:0003723,GO:0005488,GO:0005575,GO:0005730,GO:0006139,GO:0006364,GO:0006396,GO:0006725,GO:0006807,GO:0007275,GO:0008037,GO:0008150,GO:0008152,GO:0009553,GO:0009790,GO:0009793,GO:0009987,GO:0016070,GO:0016072,GO:0022414,GO:0030515,GO:0030529,GO:0030684,GO:0031461,GO:0032040,GO:0032501,GO:0032502,GO:0032991,GO:0034470,GO:0034641,GO:0034660,GO:0043170,GO:…
1	27736.c0.g1.i2	164.94	0	0	0.25	-11.4038	2.43e-12	5.13e-15	1	2.77807	1	DF256_ARATH	50.725	3.18e-15	Putative defensin-like protein 256	Q2V483.1	50.725	5.3e-13	AT2G17723.1	50.725	4.35e-15	Defensin-like (DEFL) family protein				ENOG410XP06	ath:AT5G24240	GO:0000166,GO:0003674,GO:0003824,GO:0004467,GO:0005488,GO:0005524,GO:0005575,GO:0006082,GO:0006629,GO:0006631,GO:0008150,GO:0008152,GO:0009507,GO:0009526,GO:0009536,GO:0009941,GO:0009987,GO:0015645,GO:0016020,GO:0016874,GO:0016877,GO:0016878,GO:0017076,GO:0019752,GO:0030554,GO:0031967,GO:0031975,GO:0032553,GO:0032555,GO:0032559,GO:0032787,GO:0035639,GO:0036094,GO:0043167,GO:0043168,GO:0043226,GO:…
1	27747.c1.g1.i2	26.19	10.66	3.53	2.72	-0.428626	1	-2.0612	0.0244577	-0.0604192	1	TMN12_ARATH	97.727	0	Transmembrane 9 superfamily member 12 {ECO:0000305}	XP_002863313.2	98.106	0	AT4G12650.1	97.727	0	Endomembrane protein 70 protein family	PF08161.11
1	27753.c0.g1.i5	24.18	0.91	10.4	11.53	-3.86457	9.05e-05	2.92291	0.00175198	0.481139	1					EOA22513.1	94	2.04e-102	AT5G11550.1	96	4.46e-103	ARM repeat superfamily protein						GO:0003674,GO:0003824,GO:0004040,GO:0005575,GO:0005654,GO:0005737,GO:0005829,GO:0006082,GO:0006725,GO:0006807,GO:0008150,GO:0008152,GO:0009058,GO:0009683,GO:0009684,GO:0009850,GO:0009851,GO:0009987,GO:0010817,GO:0016053,GO:0016787,GO:0016810,GO:0016811,GO:0018130,GO:0019438,GO:0019752,GO:0032787,GO:0034641,GO:0034754,GO:0042430,GO:0042435,GO:0042445,GO:0042446,GO:0043436,GO:0043864,GO:0044237,GO:…
1	27774.c0.g1.i1	42.91	12.42	0.18	0.44	-0.917272	1	-6.49822	0.000102184	1.50562	1	CML5_ARATH	92.558	1.14e-132	Calmodulin-like protein 5	ESQ38946.1	84.959	1.91e-131	AT2G43290.1	92.593	1.14e-132	Calcium-binding EF-hand family protein						GO:0003674,GO:0005488,GO:0008270,GO:0043167,GO:0043169,GO:0046872,GO:0046914
1	27784.c0.g1.i1	62.55	5.46	2.37	1.93	-2.4098	0.0523614	-1.77156	0.0447656	-0.000623022	1	GRXC6_ARATH	90.141	3.35e-86	Glutaredoxin-C6	Q8L9S3.2	90.141	5.58e-84	AT4G33040.1	90.141	4.62e-86	Thioredoxin superfamily protein
1	27793.c0.g1.i2	26.76	18.71	0.1	0.26	0.232899	1	-7.69239	1.04e-09	1.43738	1	GASA6_ARATH	79.545	8.14e-45	Gibberellin-regulated protein 6	Q6NMQ7.1	79.545	1.36e-42	AT1G74670.1	79.775	8.18e-45	Gibberellin-regulated family protein	PF16661.4					GO:0003674,GO:0003824,GO:0004553,GO:0005575,GO:0005576,GO:0005618,GO:0005975,GO:0005976,GO:0006073,GO:0008150,GO:0008152,GO:0009987,GO:0010383,GO:0010410,GO:0010411,GO:0016043,GO:0016740,GO:0016757,GO:0016758,GO:0016762,GO:0016787,GO:0016798,GO:0030312,GO:0042546,GO:0043170,GO:0044036,GO:0044042,GO:0044085,GO:0044237,GO:0044238,GO:0044260,GO:0044262,GO:0044264,GO:0044464,GO:0045229,GO:0048046,GO:…
1	27799.c0.g1.i3	56.09	5.15	1.26	1.63	-2.4843	0.000836677	-2.49328	0.0172344	0.557799	1	CAR6_ARATH	79.63	7.69e-89	Protein C2-DOMAIN ABA-RELATED 6 {ECO:0000303|PubMed:25465408}	EOA34086.1	84.81	5.82e-92	AT1G70800.1	79.755	7.73e-89	Calcium-dependent lipid-binding (CaLB domain) family protein
1	27818.c0.g1.i1	63.78	5.27	0.14	0.15	-2.77408	0.00783214	-5.57801	7.23e-07	0.273395	1	GDU3_ARATH	82.993	5.77e-50	Protein GLUTAMINE DUMPER 3	EFH42482.1	80.952	6.11e-48	AT5G57685.1	82.993	7.95e-50	glutamine dumper 3					ath:AT3G58780`KO:K09264	GO:0003674,GO:0003824,GO:0005575,GO:0005783,GO:0006082,GO:0006629,GO:0006631,GO:0006633,GO:0008150,GO:0008152,GO:0008610,GO:0009058,GO:0009987,GO:0016020,GO:0016053,GO:0016740,GO:0016746,GO:0016747,GO:0019752,GO:0032787,GO:0043226,GO:0043227,GO:0043229,GO:0043231,GO:0043436,GO:0044237,GO:0044238,GO:0044249,GO:0044255,GO:0044281,GO:0044283,GO:0044424,GO:0044444,GO:0044464,GO:0044699,GO:0044710,GO:…
1	27825.c1.g1.i1	17.86	3.13	0.02	0	-1.63097	0.462619	-7.07168	4.82e-05	-1.77846	1	ATL54_ARATH	70.748	4.99e-171	RING-H2 finger protein ATL54	EFH65122.1	74.487	2.23e-172	AT1G72220.1	70.814	5.03e-171	RING/U-box superfamily protein						GO:0000118,GO:0000122,GO:0000785,GO:0005575,GO:0005829,GO:0006139,GO:0006325,GO:0006351,GO:0006355,GO:0006357,GO:0006464,GO:0006476,GO:0006725,GO:0006807,GO:0008150,GO:0008152,GO:0009058,GO:0009059,GO:0009889,GO:0009890,GO:0009892,GO:0009987,GO:0010468,GO:0010556,GO:0010558,GO:0010605,GO:0010629,GO:0016043,GO:0016070,GO:0016569,GO:0016570,GO:0016575,GO:0018130,GO:0019219,GO:0019222,GO:0019438,GO:…
1	27847.c0.g1.i1	19.18	2.11	0.93	0.13	-2.19576	0.0394504	-1.78889	0.636954	-2.1856	1					EOA19943.1	90.909	4.75e-99	AT5G12950.1	88.961	2.61e-96	proline-tRNA ligase (DUF1680)						GO:0000166,GO:0003674,GO:0003824,GO:0004457,GO:0004458,GO:0005488,GO:0005575,GO:0005739,GO:0006082,GO:0006089,GO:0006091,GO:0006807,GO:0008150,GO:0008152,GO:0009853,GO:0009987,GO:0016491,GO:0016614,GO:0016898,GO:0019516,GO:0019752,GO:0022900,GO:0022904,GO:0032787,GO:0036094,GO:0043094,GO:0043167,GO:0043168,GO:0043226,GO:0043227,GO:0043229,GO:0043231,GO:0043436,GO:0044237,GO:0044281,GO:0044424,GO:…
1	27857.c0.g1.i4	7.77	0.06	0	0	-5.84296	7.34e-10	-3.71353	1	0	1					EFH42427.1	61.824	0	AT5G56850.4	64.286	0	hypothetical protein						GO:0003674,GO:0003824,GO:0005575,GO:0005739,GO:0006790,GO:0008150,GO:0008152,GO:0009058,GO:0009507,GO:0009536,GO:0009987,GO:0016043,GO:0016226,GO:0016491,GO:0016740,GO:0022607,GO:0031163,GO:0043226,GO:0043227,GO:0043229,GO:0043231,GO:0044237,GO:0044249,GO:0044424,GO:0044444,GO:0044464,GO:0051186,GO:0051188,GO:0071840
1	27858.c0.g1.i2	139.34	40.52	12.58	9.76	-0.775152	1	-2.18628	0.00316758	-0.102591	1					XP_010494795.1	91.608	3.05e-95	AT5G46230.1	86.806	2.3e-90	hypothetical protein (Protein of unknown function DUF538)	PF07522.13
1	27862.c0.g1.i1	4.73	0.03	0.06	0.24	-6.09802	0.000202452	0.453489	1	2.06047	1	FB303_ARATH	79.56	1.36e-169	F-box protein At1g22220	EOA38282.1	81.505	1.33e-179	AT1G22220.1	79.624	1.37e-169	F-box family protein	PF00931.21			COG0666	ath:AT3G12360	GO:0003674,GO:0003824,GO:0004175,GO:0004222,GO:0005488,GO:0005575,GO:0005773,GO:0005783,GO:0006508,GO:0006807,GO:0008150,GO:0008152,GO:0008233,GO:0008237,GO:0009987,GO:0016021,GO:0016485,GO:0016787,GO:0019538,GO:0030176,GO:0031224,GO:0031227,GO:0043167,GO:0043169,GO:0043170,GO:0043226,GO:0043227,GO:0043229,GO:0043231,GO:0044237,GO:0044238,GO:0044260,GO:0044267,GO:0044422,GO:0044424,GO:0044425,GO:…
1	27872.c0.g1.i1	1039.85	0	0	0	-11.3022	3.61e-11	5.13e-15	1	0	1	NLTP_VIGUN	55.263	4.02e-08	Probable non-specific lipid-transfer protein AKCS9	XP_010440915.1	57.692	3.74e-16	AT5G38160.1	48.052	4.14e-15	Bifunctional inhibitor/lipid-transfer protein/seed storage 2S albumin superfamily protein
1	27872.c0.g2.i1	121.94	0	0	0	-10.2055	3.81e-08	5.13e-15	1	0	1	NLTP_VIGUN	51.515	3.91e-19	Probable non-specific lipid-transfer protein AKCS9	XP_010440915.1	58.491	4.47e-31	AT5G38160.1	52.83	1.87e-31	Bifunctional inhibitor/lipid-transfer protein/seed storage 2S albumin superfamily protein						GO:0000041,GO:0000166,GO:0003674,GO:0003824,GO:0005215,GO:0005385,GO:0005488,GO:0005524,GO:0005575,GO:0005886,GO:0005911,GO:0006810,GO:0006811,GO:0006812,GO:0006829,GO:0008150,GO:0008324,GO:0008551,GO:0009506,GO:0010035,GO:0010038,GO:0010043,GO:0015075,GO:0015086,GO:0015399,GO:0015405,GO:0015662,GO:0015691,GO:0016020,GO:0016021,GO:0016462,GO:0016463,GO:0016787,GO:0016817,GO:0016818,GO:0016820,GO:…
1	27890.c0.g1.i1	200.13	3.18	0.48	0.95	-5.18352	6.9e-06	-3.11504	0.114987	1.25175	1					XP_010433247.1	79.07	4.29e-39	AT4G28240.1	79.31	9.49e-41	Wound-responsive family protein
1	27912.c1.g1.i2	12.89	3.34	0.39	0.54	-1.06718	0.758641	-3.50107	0.00213986	0.742437	1					EFH63357.1	98.165	2.24e-68	AT1G67060.1	96.33	8.85e-70	peptidase M50B-like protein
1	27917.c0.g2.i1	8.7	4.93	1.17	0.7	0.110359	1	-2.55547	0.0225457	-0.418506	1	Y5673_ARATH	86.512	1.45e-117	WEB family protein At5g16730, chloroplastic	BAD94516.1	86.512	3.25e-121	AT5G16730.1	86.512	1.98e-117	weak chloroplast movement under blue light protein (DUF827)
1	27918.c0.g1.i7	9.69	0.79	1.77	2.26	-2.70652	0.00214902	0.595584	1	0.602906	1	RNS1_ARATH	46.617	1.95e-37	Ribonuclease 1	XP_013605414.1	83.2	1.19e-73	AT1G14210.1	82.645	6.88e-72	Ribonuclease T2 family protein
1	27933.c0.g1.i1	9.03	0.16	0.17	0.12	-4.82114	2.89e-06	-0.416502	1	-0.271615	1					XP_002874506.2	76.303	4.67e-82	AT4G08910.1	76.995	6.54e-77	homeobox protein	PF00153.26
1	27934.c0.g1.i1	65.81	6.28	10.45	6.95	-2.43551	0.000952593	0.14389	1	-0.332241	1	LWD1_ARATH	98.182	5.86e-74	WD repeat-containing protein LWD1	CAE76645.1	98.182	6.11e-72	AT1G12910.1	98.198	5.87e-74	Transducin/WD40 repeat-like superfamily protein	PF00400.31
1	27940.c0.g1.i2	20.25	2.62	0	0	-1.96976	0.111954	-6.1887	0.00508288	0	1	AGL11_ARATH	87.234	1.12e-44	Agamous-like MADS-box protein AGL11	Q38836.1	87.234	1.87e-42	AT4G09960.1	87.368	1.07e-44	K-box region and MADS-box transcription factor family protein		sigP:1^26^0.674^YES	ExpAA=85.24^PredHel=4^Topology=i7-24o55-77i84-106o121-143i	ENOG410ZMP5	ath:AT3G04580`KO:K14509	GO:0003674,GO:0005488,GO:0005515,GO:0005575,GO:0006139,GO:0006351,GO:0006355,GO:0006357,GO:0006725,GO:0006807,GO:0008134,GO:0008150,GO:0008152,GO:0009058,GO:0009059,GO:0009889,GO:0009891,GO:0009893,GO:0009987,GO:0010468,GO:0010556,GO:0010557,GO:0010604,GO:0010628,GO:0016070,GO:0016592,GO:0018130,GO:0019219,GO:0019222,GO:0019438,GO:0031323,GO:0031325,GO:0031326,GO:0031328,GO:0032774,GO:0032991,GO:…
1	27950.c0.g1.i1	21.14	2.22	2.63	1.62	-2.34082	0.0233607	-0.184256	1	-0.506467	1	NUDT1_ARATH	89.041	6.74e-94	Nudix hydrolase 1	XP_010470855.1	91.781	3.49e-93	AT1G68760.1	89.041	9.31e-94	nudix hydrolase 1
1	27964.c0.g1.i2	125.58	0.17	0.17	0	-8.11487	1.51e-08	-0.434361	1	-1.77852	1	DF175_ARATH	49.315	8.39e-15	Defensin-like protein 175	Q2V4H7.1	49.315	1.4e-12	AT1G49715.1	49.315	1.15e-14	Defensin-like (DEFL) family protein						GO:0000166,GO:0003674,GO:0003676,GO:0003723,GO:0003729,GO:0003824,GO:0004672,GO:0004674,GO:0005488,GO:0005524,GO:0005575,GO:0005634,GO:0005737,GO:0006464,GO:0006468,GO:0006793,GO:0006796,GO:0006807,GO:0006950,GO:0006970,GO:0007165,GO:0008150,GO:0008152,GO:0009628,GO:0009651,GO:0009987,GO:0016301,GO:0016310,GO:0016740,GO:0016772,GO:0016773,GO:0017076,GO:0019538,GO:0030554,GO:0032553,GO:0032555,GO:…
1	27964.c1.g1.i1	104.59	0.26	0.28	0	-7.14033	1.34e-06	-0.308783	1	-1.77851	1	DF176_ARATH	48.193	7.61e-16	Defensin-like protein 176	P82779.1	48.193	1.27e-13	AT1G73607.1	48.193	1.04e-15	low-molecular-weight cysteine-rich 65				COG4677	ath:AT5G07430
1	27964.c1.g2.i1	126.8	0	0	0	-10.5692	9.69e-10	5.13e-15	1	0	1	DF175_ARATH	56.061	1.27e-15	Defensin-like protein 175	Q2V4H7.1	56.061	2.11e-13	AT1G49715.1	56.061	1.74e-15	Defensin-like (DEFL) family protein	PF08263.11			ENOG410YCH0	ath:AT2G42690	GO:0000166,GO:0001882,GO:0001883,GO:0003674,GO:0003676,GO:0003723,GO:0003746,GO:0003824,GO:0003924,GO:0005488,GO:0005524,GO:0005525,GO:0005575,GO:0005576,GO:0005739,GO:0006996,GO:0008135,GO:0008150,GO:0009507,GO:0009526,GO:0009532,GO:0009536,GO:0009570,GO:0009657,GO:0009658,GO:0009791,GO:0009845,GO:0009941,GO:0009987,GO:0016043,GO:0016462,GO:0016787,GO:0016817,GO:0016818,GO:0017076,GO:0017111,GO:…
1	27967.c0.g1.i1	8.95	0	0	0	-9.41867	6.14e-10	5.13e-15	1	0	1					EFH40694.1	93.277	3.88e-130	AT5G56120.1	93.305	9.84e-131	RNA polymerase II elongation factor				ENOG410XQVB	ath:AT4G28130`KO:K00901
1	27969.c1.g1.i5	36.2	3.79	3.99	2.27	-2.37421	0.000495226	-0.427314	1	-0.561823	1	SCP42_ARATH	88.252	0	Serine carboxypeptidase-like 42	EOA13308.1	88.539	0	AT5G42240.1	88.252	0	serine carboxypeptidase-like 42
1	27977.c0.g1.i1	68.36	1.99	0	0.86	-4.04265	1.4e-06	-5.71171	0.0153193	4.21452	1	DF199_ARATH	56.79	3.77e-24	Defensin-like protein 199	EOA33872.1	64.103	1.57e-26	AT1G56553.1	56.79	5.16e-24	defensin-like protein						GO:0000139,GO:0005575,GO:0005789,GO:0006810,GO:0008104,GO:0008150,GO:0015031,GO:0015833,GO:0016020,GO:0016021,GO:0016192,GO:0031090,GO:0031224,GO:0032580,GO:0033036,GO:0033116,GO:0042886,GO:0044422,GO:0044424,GO:0044425,GO:0044431,GO:0044432,GO:0044444,GO:0044446,GO:0044464,GO:0045184,GO:0051179,GO:0051234,GO:0071702,GO:0071705,GO:0098588
1	27979.c0.g1.i1	48.96	8.72	1.79	1.77	-1.60798	0.0377034	-2.80364	9.45e-05	0.197489	1					XP_010415612.1	91.743	7.12e-69	AT2G20515.1	89.908	1.72e-67	pollen Ole e I family allergen protein
1	27991.c0.g2.i1	26.62	2.98	2.35	1.19	-2.27882	0.00692563	-0.868443	1	-0.692592	1	RPN2_ARATH	93.814	1.38e-20	Dolichyl-diphosphooligosaccharide--protein glycosyltransferase subunit 2	EOA16140.1	93.814	3.98e-19	AT4G21150.3	93.878	1.39e-20	ribophorin II (RPN2) family protein
1	28017.c0.g1.i1	39.1	2.11	0.05	0.09	-3.31463	0.0174747	-5.54534	0.0157987	1.00473	1					EFH46419.1	85.714	1.97e-44	AT4G16400.1	84.524	2.04e-46	transmembrane protein				COG4886	ath:AT1G53430	GO:0000290,GO:0000932,GO:0000956,GO:0003674,GO:0003676,GO:0003723,GO:0003729,GO:0003824,GO:0005488,GO:0005575,GO:0005737,GO:0006139,GO:0006396,GO:0006397,GO:0006401,GO:0006402,GO:0006725,GO:0006807,GO:0006950,GO:0006952,GO:0008047,GO:0008150,GO:0008152,GO:0009056,GO:0009057,GO:0009892,GO:0009987,GO:0010468,GO:0010605,GO:0010629,GO:0016070,GO:0016071,GO:0016787,GO:0019222,GO:0019439,GO:0030234,GO:…
1	28019.c3.g2.i1	45.81	4.93	7	6.61	-2.31934	0.00262589	-0.00691047	1	0.162289	1					XP_010432535.1	93.75	1.04e-56	AT4G33625.1	87.611	4.33e-55	vacuole protein
1	28024.c0.g1.i2	13.27	0	0	0	-8.50604	9.01e-06	5.13e-15	1	0	1															ENOG410XPSE	ath:AT5G14870`KO:K05391	GO:0000166,GO:0003674,GO:0003824,GO:0004672,GO:0004674,GO:0005488,GO:0005524,GO:0005575,GO:0005829,GO:0006464,GO:0006468,GO:0006793,GO:0006796,GO:0006807,GO:0008150,GO:0008152,GO:0009933,GO:0009987,GO:0016301,GO:0016310,GO:0016740,GO:0016772,GO:0016773,GO:0017076,GO:0019538,GO:0030554,GO:0032502,GO:0032553,GO:0032555,GO:0032559,GO:0035639,GO:0036094,GO:0036211,GO:0043167,GO:0043168,GO:0043170,GO:…
1	28030.c0.g1.i2	46.69	3.97	9.65	11.6	-2.58826	0.00451196	0.645542	1	0.517165	1	PLAT1_ARATH	79.343	1.16e-112	PLAT domain-containing protein 1 {ECO:0000305}	EOA17482.1	78.972	4.87e-112	AT4G39730.1	79.439	1.17e-112	Lipase/lipooxygenase PLAT/LH2 family protein						GO:0005575,GO:0005739,GO:0008150,GO:0010035,GO:0010038,GO:0042221,GO:0043226,GO:0043227,GO:0043229,GO:0043231,GO:0044424,GO:0044444,GO:0044464,GO:0046686,GO:0050896
1	28031.c0.g1.i2	23.18	2.36	6.18	7.22	-2.46678	0.00278153	0.89251	1	0.43645	1					XP_010442104.1	72.683	9.7e-90	AT5G42900.3	73.171	1.81e-86	cold regulated protein 27
1	28038.c0.g1.i2	16.03	0.05	0	0	-7.16258	3.58e-08	-2.02711	1	0	1					XP_020874241.1	91.803	9.73e-107	AT5G36800.2	84	1.8e-107	transmembrane protein						GO:0000166,GO:0002682,GO:0002697,GO:0002831,GO:0003674,GO:0003824,GO:0004672,GO:0004674,GO:0005488,GO:0005524,GO:0005575,GO:0005634,GO:0005737,GO:0005975,GO:0006082,GO:0006464,GO:0006468,GO:0006629,GO:0006631,GO:0006633,GO:0006793,GO:0006796,GO:0006807,GO:0007165,GO:0008150,GO:0008152,GO:0008610,GO:0009058,GO:0009987,GO:0016032,GO:0016053,GO:0016301,GO:0016310,GO:0016740,GO:0016772,GO:0016773,GO:…
1	28057.c0.g1.i3	69.85	5.51	0.79	0.08	-2.75773	0.000512899	-3.20091	0.00846453	-2.81096	1					XP_010456112.1	93.043	2.46e-73	AT4G01897.1	85.217	3.13e-68	dihydroorotate dehydrogenase
1	28062.c0.g1.i2	16.89	0.09	0.45	0.19	-6.41386	2.91e-06	1.54019	1	-0.932593	1	Y4498_ARATH	49.123	4.83e-11	Uncharacterized protein At4g04980	XP_010475992.1	70.166	4.78e-71	AT1G11070.3	67.978	1.51e-67	hydroxyproline-rich glycoprotein family protein				COG1502	ath:AT3G16785`KO:K01115	GO:0003674,GO:0003824,GO:0004177,GO:0005575,GO:0005576,GO:0006508,GO:0006807,GO:0008150,GO:0008152,GO:0008233,GO:0008236,GO:0008238,GO:0008239,GO:0009561,GO:0016787,GO:0017171,GO:0019538,GO:0032501,GO:0043170,GO:0044238,GO:0044699,GO:0044707,GO:0070011,GO:0071704,GO:1901564
1	28065.c1.g1.i3	9.37	0.44	0.42	0.73	-3.43602	0.000407106	-0.652233	1	1.07235	1	UNC13_ARATH	94.792	1.65e-76	Protein unc-13 homolog {ECO:0000305}	XP_019097981.1	95.833	6.47e-75	AT5G06970.1	94.792	2.25e-76	plant/protein (DUF810)	PF00078.26
1	28079.c0.g1.i1	40.38	7.13	3.98	4.24	-1.63318	0.0287827	-1.35216	0.219882	0.37153	1					XP_010424840.1	88.655	0	AT2G01070.1	87.324	0	Lung seven transmembrane receptor family protein	PF07727.13
1	28091.c0.g1.i1	46.92	8.33	7.38	5.34	-1.61402	0.0449204	-0.703146	1	-0.248925	1	CESA1_ARATH	99.065	3.94e-68	Cellulose synthase A catalytic subunit 1 [UDP-forming]	O48946.1	99.065	6.58e-66	AT4G32410.1	99.074	3.96e-68	cellulose synthase 1
1	28141.c0.g1.i3	88.34	6.26	0.18	0.35	-2.95542	0.00545859	-5.4796	1.47e-08	1.01379	1	MT3_ARATH	83.333	3.29e-24	Metallothionein-like protein 3	AEE75656.1	73.134	1.77e-22	AT3G15353.2	73.529	1.07e-24	metallothionein 3						GO:0005575,GO:0009507,GO:0009526,GO:0009536,GO:0009941,GO:0031967,GO:0031975,GO:0043226,GO:0043227,GO:0043229,GO:0043231,GO:0044422,GO:0044424,GO:0044434,GO:0044435,GO:0044444,GO:0044446,GO:0044464
1	28148.c0.g1.i2	56.16	2.22	0	0.05	-3.71615	1.3e-06	-8.1515	1.6e-07	2.77798	1	CADH7_ARATH	89.636	0	Cinnamyl alcohol dehydrogenase 7	EFH45214.1	89.607	0	AT4G37980.1	89.665	0	cinnamyl alcohol dehydrogenase 7						GO:0003674,GO:0003824,GO:0004497,GO:0005488,GO:0005506,GO:0005575,GO:0005783,GO:0006082,GO:0006629,GO:0006720,GO:0006721,GO:0007165,GO:0008150,GO:0008152,GO:0008299,GO:0008610,GO:0009058,GO:0009527,GO:0009685,GO:0009686,GO:0009707,GO:0009740,GO:0009755,GO:0009987,GO:0010241,GO:0010476,GO:0016020,GO:0016021,GO:0016053,GO:0016101,GO:0016102,GO:0016114,GO:0016491,GO:0016705,GO:0016709,GO:0019752,GO:…
1	28150.c0.g1.i4	308.39	9.33	2.97	2.97	-4.12459	4.61e-12	-2.19567	0.000712843	0.281182	1	BADH1_ARATH	95.01	0	Betaine aldehyde dehydrogenase 1, chloroplastic	Q9S795.1	95.01	0	AT1G74920.1	95.02	0	aldehyde dehydrogenase 10A8
1	28152.c1.g1.i1	24.48	0	0.08	0.08	-9.19913	6.33e-08	1.72412	1	0.233491	1					XP_023636693.1	47.5	8.52e-18										GO:0003674,GO:0003824,GO:0005488,GO:0008150,GO:0008152,GO:0016491,GO:0043167,GO:0043169,GO:0044699,GO:0044710,GO:0046872,GO:0055114
1	28180.c14.g1.i4	32.05	0.55	0.1	0.27	-5.01585	4.92e-09	-2.8252	0.222763	1.63632	1	UAP1_ARATH	88	0	UDP-N-acetylglucosamine diphosphorylase 1	Q940S3.1	88	0	AT1G31070.2	88.022	0	N-acetylglucosamine-1-phosphate uridylyltransferase 1	PF04434.16
1	28184.c0.g1.i5	8.77	0.43	0.72	0.36	-3.3949	3.1e-05	0.191834	1	-0.682966	1	TIC62_ARATH	77.778	2.64e-42	Protein TIC 62, chloroplastic {ECO:0000303|PubMed:12426385}	XP_010487816.1	64.384	1.61e-48	AT3G18890.1	78.125	2.86e-42	NAD(P)-binding Rossmann-fold superfamily protein						GO:0003674,GO:0003824,GO:0005575,GO:0005783,GO:0005789,GO:0006082,GO:0006629,GO:0006631,GO:0006633,GO:0006636,GO:0008150,GO:0008152,GO:0008610,GO:0009058,GO:0009628,GO:0009987,GO:0016020,GO:0016021,GO:0016053,GO:0016491,GO:0016705,GO:0016717,GO:0019752,GO:0031224,GO:0032787,GO:0033559,GO:0042389,GO:0043226,GO:0043227,GO:0043229,GO:0043231,GO:0043436,GO:0044237,GO:0044238,GO:0044249,GO:0044255,GO:…
1	28186.c1.g1.i1	26.9	0.96	1.46	1.28	-3.94781	8.27e-06	-0.00587858	1	0.126919	1	RLK90_ARATH	92.398	2.08e-99	Probable inactive receptor kinase RLK902	EFH59350.1	93.567	1.17e-100	AT3G17840.1	92.398	2.84e-99	receptor-like kinase 902
1	28202.c0.g1.i4	53.12	8.43	21.34	17.74	-1.71073	0.0374482	0.79397	0.948817	-0.0386704	1	CSK2C_ARATH	97.778	2.87e-24	Casein kinase II subunit beta-2 {ECO:0000305}	XP_020872607.1	100	3.21e-23	AT4G17640.2	97.826	2.48e-24	casein kinase II beta chain 2
1	28203.c0.g1.i1	20.86	2.55	0.91	3.31	-2.17367	0.0335501	-1.98591	0.231028	2.00137	1					OAP11646.1	76.147	1.6e-45	AT2G15580.3	76.147	1.32e-47	RING/U-box superfamily protein
1	28213.c0.g1.i1	67.45	15.72	3.18	2.43	-1.2422	0.224479	-2.79586	0.000207762	-0.140539	1	RLF31_ARATH	85.841	8.8e-65	Protein RALF-like 31	EOA17692.1	84.821	9.54e-64	AT4G13950.1	85.965	8.84e-65	ralf-like 31
1	28226.c0.g1.i2	207.3	24.72	66.55	46.61	-2.07492	0.00587513	0.787252	0.979139	-0.287685	1	AVP1_ARATH	99.448	4.37e-125	Pyrophosphate-energized vacuolar membrane proton pump 1	XP_018450714.1	100	9.63e-124	AT1G15690.1	99.451	4.52e-125	Inorganic H pyrophosphatase family protein
1	28235.c0.g1.i2	62.5	7.99	1.71	0.28	-2.10038	0.0109037	-2.7524	0.00725413	-2.11842	1	PEPR1_ARATH	83.607	1.76e-28	Leucine-rich repeat receptor-like protein kinase PEPR1	EFH63729.1	88.525	1.58e-27	AT1G73080.1	83.607	2.35e-28	PEP1 receptor 1		sigP:1^30^0.556^YES
1	28242.c0.g1.i1	52.62	4.48	8.91	3.74	-2.56924	0.000309203	0.403174	1	-1.00367	1	LWD1_ARATH	98.131	2.87e-157	WD repeat-containing protein LWD1	AAM65213.1	98.131	3.52e-155	AT1G12910.1	98.131	3.96e-157	Transducin/WD40 repeat-like superfamily protein						GO:0003006,GO:0003674,GO:0003824,GO:0004312,GO:0005575,GO:0005783,GO:0006082,GO:0006629,GO:0006631,GO:0006633,GO:0006950,GO:0008150,GO:0008152,GO:0008610,GO:0009058,GO:0009266,GO:0009314,GO:0009409,GO:0009416,GO:0009628,GO:0009922,GO:0009987,GO:0016020,GO:0016021,GO:0016053,GO:0016740,GO:0016746,GO:0016747,GO:0019752,GO:0022414,GO:0031224,GO:0032502,GO:0032787,GO:0043226,GO:0043227,GO:0043229,GO:…
1	28245.c0.g1.i1	7.38	0.05	0	0.06	-5.94224	1.43e-05	-2.01663	1	1.97673	1	NLTL2_ARATH	82.822	2.46e-71	Non-specific lipid-transfer protein-like protein At2g13820	XP_002885894.2	82.209	6.23e-74	AT2G13820.3	79.412	2.39e-71	Bifunctional inhibitor/lipid-transfer protein/seed storage 2S albumin superfamily protein						GO:0000166,GO:0000302,GO:0003674,GO:0005488,GO:0005524,GO:0006950,GO:0006979,GO:0008150,GO:0009266,GO:0009314,GO:0009408,GO:0009416,GO:0009628,GO:0009642,GO:0009644,GO:0010035,GO:0017076,GO:0030554,GO:0032553,GO:0032555,GO:0032559,GO:0035639,GO:0036094,GO:0042221,GO:0042542,GO:0043167,GO:0043168,GO:0050896,GO:0097159,GO:0097367,GO:1901265,GO:1901363,GO:1901700
1	28260.c0.g1.i1	73.21	15.19	2.5	4.08	-1.48634	0.160369	-3.06967	0.00141052	0.956344	1					EFH43368.1	70.476	3.11e-50	AT4G34630.1	66.169	2.09e-47	prostatic spermine-binding-like protein				COG0515	ath:AT1G76370
1	28262.c0.g1.i1	164.52	100.81	29.56	26.67	0.114869	1	-2.28733	0.000699902	0.0745814	1	PKP2_ARATH	91.667	2.45e-29	Plastidial pyruvate kinase 2	EFH40459.1	92.857	1.41e-28	AT5G52920.1	91.667	3.28e-29	plastidic pyruvate kinase beta subunit 1
1	28268.c0.g2.i1	20.56	2.58	2.42	1.53	-2.06401	0.00276768	-0.642399	1	-0.411285	1	TBCB_ARATH	95.062	6.08e-173	Tubulin-folding cofactor B	EFH58916.1	96.296	4.36e-173	AT3G10220.1	95.082	6.12e-173	tubulin folding cofactor B
1	28280.c0.g1.i1	18.1	10.1	2.23	3.11	0.0366442	1	-2.69009	0.00398824	0.834017	1	U72B1_ARATH	85.256	2.43e-92	UDP-glycosyltransferase 72B1	XP_010456210.1	91.667	7.09e-98	AT4G01070.2	85.256	3.34e-93	UDP-Glycosyltransferase superfamily protein
1	28289.c12.g1.i1	41.31	1.11	1.92	1.34	-4.1529	0.00111858	0.14198	1	-0.266005	1	BARS1_ARATH	84.884	4.05e-48	Baruol synthase	XP_019089336.1	86.047	2.58e-47	AT4G15370.2	84.884	4.98e-48	baruol synthase 1			ExpAA=44.90^PredHel=2^Topology=o29-51i64-86o	ENOG410Y931	ath:AT1G55850
1	28303.c0.g1.i1	47.82	0.63	0.04	0	-5.43129	6.23e-07	-3.8543	0.294402	-1.77845	1	YLS3_ARATH	33.333	9.32e-27	Protein YLS3	XP_010480053.1	86.957	6.44e-86	AT1G55260.1	76.503	5.35e-85	Bifunctional inhibitor/lipid-transfer protein/seed storage 2S albumin superfamily protein					ath:AT2G41280
1	28305.c0.g1.i3	105.37	2.34	0.8	0.33	-4.68184	6.16e-08	-1.97715	0.394043	-0.976661	1	ADK1_ARATH	97.487	1.43e-145	Adenosine kinase 1	EOA30956.1	97.99	1.23e-143	AT3G09820.2	97.487	1.57e-145	adenosine kinase 1
1	28313.c0.g1.i4	58.51	2.63	3.17	2.83	-3.54797	1.79e-05	-0.312408	1	0.100736	1	DTX35_ARATH	93.13	1.07e-80	Protein DETOXIFICATION 35 {ECO:0000303|PubMed:11739388}	BAJ33972.1	94.656	8.41e-80	AT4G25640.3	93.13	1.32e-80	detoxifying efflux carrier 35				COG0474	ath:AT1G07810`KO:K01537
1	28318.c0.g1.i2	24.87	2.1	0.66	0.6	-2.69343	0.00176323	-2.17955	0.122969	0.152265	1					EOA19014.1	81.301	1.31e-50	AT4G16447.1	78.862	3.51e-51	hypothetical protein
1	28326.c0.g1.i1	22.56	0	0	0	-8.95457	7.8e-06	5.13e-15	1	0	1												PF07298.10		ExpAA=109.16^PredHel=5^Topology=o29-51i63-85o100-122i142-164o174-196i			GO:0003674,GO:0003824,GO:0003841,GO:0005575,GO:0006629,GO:0006644,GO:0006650,GO:0006793,GO:0006796,GO:0008150,GO:0008152,GO:0008374,GO:0008610,GO:0008654,GO:0009058,GO:0009987,GO:0016021,GO:0016024,GO:0016411,GO:0016740,GO:0016746,GO:0016747,GO:0019637,GO:0031224,GO:0042171,GO:0044237,GO:0044238,GO:0044249,GO:0044255,GO:0044425,GO:0044699,GO:0044710,GO:0044711,GO:0044763,GO:0045017,GO:0046341,GO:…
1	28327.c0.g1.i2	9.88	0.34	0.36	0.35	-3.81097	0.00692295	-0.344757	1	0.267789	1					KGN65843.1	96.552	1.42e-40	AT2G30200.2	98.276	3.38e-44	EMBRYO DEFECTIVE 3147	PF00886.18		ExpAA=146.68^PredHel=7^Topology=o10-32i53-75o104-123i159-181o248-270i296-318o328-347i	COG5202	ath:AT1G63050`KO:K13519	GO:0003674,GO:0003824,GO:0005575,GO:0005777,GO:0006082,GO:0006629,GO:0006631,GO:0008150,GO:0008152,GO:0009987,GO:0016874,GO:0019752,GO:0032787,GO:0042579,GO:0043226,GO:0043227,GO:0043229,GO:0043231,GO:0043436,GO:0044237,GO:0044238,GO:0044255,GO:0044281,GO:0044424,GO:0044444,GO:0044464,GO:0044699,GO:0044710,GO:0044763,GO:0071704
1	28327.c0.g2.i3	73.88	6.05	1.75	0.9	-2.82178	0.000289446	-2.2723	0.0190825	-0.706449	1					CDY29690.1	95.853	7.14e-138	AT2G30200.1	95.853	1.71e-139	EMBRYO DEFECTIVE 3147
1	28346.c0.g1.i3	9.15	5.23	0.28	0.33	0.0792553	1	-4.5909	2.45e-05	0.483458	1	KUA1_ARATH	77.143	2.96e-38	Transcription factor KUA1 {ECO:0000303|PubMed:24806884}	XP_010415672.1	75.238	7.06e-76	AT1G70000.2	80	1.38e-72	myb-like transcription factor family protein				ENOG4112BHH
1	28355.c0.g1.i2	10.07	1.42	0.06	0	-1.96048	0.0694576	-4.6912	0.00124945	-2.55254	1	RBL3_ARATH	79.769	4.84e-138	RHOMBOID-like protein 3 {ECO:0000303|PubMed:16223493, ECO:0000303|PubMed:17181860}	EOA20989.1	80.925	2.1e-150	AT5G07250.1	79.827	4.87e-138	RHOMBOID-like protein 3	PF00096.25
1	28363.c0.g1.i1	11.7	8.35	0.07	0.07	0.439431	1	-6.77961	2.95e-08	0.233457	1	SMR3_ARATH	75.652	1.33e-51	Cyclin-dependent protein kinase inhibitor SMR3 {ECO:0000303|PubMed:24399300, ECO:0000303|PubMed:26546445}	Q9LZ60.1	75.652	2.21e-49	AT5G02420.1	75.862	1.33e-51	cyclin-dependent kinase inhibitor SMR3-like protein
1	28365.c0.g1.i1	8.71	2.65	0.36	0.25	-0.968724	1	-3.27271	0.00897492	-0.176721	1	DIR7_ARATH	87.097	2.78e-120	Dirigent protein 7	XP_020888179.1	88.71	2.44e-119	AT3G13650.1	87.166	3.76e-120	Disease resistance-responsive (dirigent-like protein) family protein
1	28367.c0.g2.i1	67.43	8.14	24.62	27.6	-2.12346	0.00393418	0.995566	0.497345	0.434396	1	RR6_ARATH	92.308	1.55e-101	30S ribosomal protein S6 alpha, chloroplastic	XP_010418520.2	95.327	3.59e-108	AT1G64510.2	92.056	6.59e-102	Translation elongation factor EF1B/ribosomal protein S6 family protein
1	28381.c0.g2.i1	14.57	0.48	0.28	0.19	-3.90525	5.21e-05	-1.35969	1	-0.26529	1					EOA14261.1	76.699	1.81e-43	AT5G43150.1	80.645	1.88e-43	elongation factor	PF00027.28			COG3386	ath:AT3G51450
1	28383.c0.g1.i1	392.89	1.9	0.2	0.16	-6.71441	1.65e-19	-3.67689	0.00281927	-0.123991	1														ExpAA=133.15^PredHel=5^Topology=i12-34o39-61i68-90o166-188i201-223o
1	28389.c0.g1.i1	16.26	3.77	1.47	1.59	-1.22133	0.329623	-1.86791	0.0416576	0.374512	1	B561C_ARATH	86.702	0	Cytochrome b561 and DOMON domain-containing protein At3g25290	XP_002883602.2	87.186	0	AT3G25290.2	86.702	0	Auxin-responsive family protein
1	28397.c0.g1.i1	368.18	8.04	0.46	0.53	-4.65906	8.27e-06	-4.56072	0.000897955	0.433581	1	DIR3_ARATH	77.273	3.81e-86	Dirigent protein 3	OAO94169.1	78.409	2.45e-84	AT5G49040.1	77.401	3.84e-86	Disease resistance-responsive (dirigent-like protein) family protein				COG5560	ath:AT1G04860`KO:K11844
1	28404.c0.g1.i1	7.35	0.97	0.83	0.74	-1.93291	0.0495406	-0.786863	1	0.118569	1	P2C29_ARATH	84.983	1.06e-135	Protein phosphatase 2C 29	BAF01477.1	84.983	6.44e-138	AT2G35350.1	84.983	1.46e-135	poltergeist like 1
1	28411.c0.g2.i1	28.62	1.93	2.89	0.76	-2.93486	0.00111071	-0.0105315	1	-1.63323	1	ATL8_ARATH	72.414	1.28e-63	RING-H2 finger protein ATL8	EFH63896.1	73.864	3.52e-67	AT1G76410.1	72.414	1.76e-63	RING/U-box superfamily protein
1	28413.c0.g1.i3	34.41	2.07	0.26	0.94	-3.07041	0.00194623	-3.30949	0.0566607	1.87379	1															COG2723	ath:AT1G75940`KO:K01188
1	28426.c0.g2.i3	8.55	0.85	0.3	0.49	-2.45835	0.0193324	-1.93769	0.611046	0.933569	1					EOA26393.1	82.5	0	AT2G21385.1	81.844	0	hypothetical protein
1	28442.c0.g1.i3	11.68	1.22	4.24	5.29	-2.27797	0.0144909	1.21759	0.725853	0.565528	1					ESQ48049.1	85.075	3.39e-24	AT3G18510.1	77.941	1.99e-24	ATP-dependent helicase/nuclease subunit
1	28445.c1.g1.i1	89.11	20.03	2.33	2.68	-1.33888	0.170746	-3.59983	3.3e-08	0.442132	1	RD522_ARATH	79.874	9e-72	DNA repair RAD52-like protein 2, chloroplastic {ECO:0000305}	XP_019087790.1	81.437	4.43e-81	AT5G47870.1	79.874	1.24e-71	cobalt ion-binding protein
1	28466.c1.g1.i6	521.35	46.17	30.81	31.12	-2.67611	0.000129608	-1.08475	0.328256	0.256018	1	ACBP_BRANA	83.529	3.28e-46	Acyl-CoA-binding protein	XP_010499725.1	89.655	1.67e-48	AT1G31812.1	78.824	6.07e-43	acyl-CoA-binding protein 6
1	28467.c0.g1.i1	5861.64	0.52	2.05	0.29	-12.1588	2.35e-16	1.36881	1	-2.37319	1					XP_006412069.2	54.545	8.46e-18	AT4G35725.1	45.333	2.67e-12	transmembrane protein
1	28467.c0.g2.i1	284.39	0.1	0.4	0.11	-10.0896	2.05e-13	1.32418	1	-1.4405	1					XP_006412069.2	46.591	3.6e-16	AT4G35725.1	39.535	4.63e-12	transmembrane protein				COG0596	ath:AT4G24160`KO:K13699
1	28469.c0.g2.i1	24.87	1.38	0.12	0.13	-3.27077	7.85e-06	-3.80481	0.00238116	0.243319	1	RBK1_ARATH	44.693	3.04e-47	Receptor-like cytosolic serine/threonine-protein kinase RBK1	BAB10356.1	93.562	3.89e-160	AT5G37790.1	93.59	4.86e-159	Protein kinase superfamily protein
1	28469.c1.g1.i1	21.01	6.9	0.04	0.04	-0.71359	1	-7.57504	7.16e-07	0.194646	1	PBL7_ARATH	42.012	1.27e-32	Probable serine/threonine-protein kinase PBL7 {ECO:0000305}	ANM59624.1	77.852	9.65e-158	AT1G66460.2	77.852	8e-160	Protein kinase superfamily protein		sigP:1^16^0.576^YES	ExpAA=171.26^PredHel=7^Topology=i2-24o34-56i100-122o137-159i180-202o273-295i315-334o			GO:0003674,GO:0003824,GO:0003854,GO:0005488,GO:0005575,GO:0006629,GO:0006694,GO:0008150,GO:0008152,GO:0008202,GO:0008610,GO:0009058,GO:0009718,GO:0009812,GO:0009813,GO:0016229,GO:0016491,GO:0016614,GO:0016616,GO:0019898,GO:0031312,GO:0033764,GO:0042406,GO:0042440,GO:0044238,GO:0044422,GO:0044424,GO:0044425,GO:0044432,GO:0044444,GO:0044446,GO:0044464,GO:0044699,GO:0044710,GO:0044711,GO:0045552,GO:…
1	28507.c0.g1.i1	70.32	31.08	10.38	8.78	-0.310846	1	-2.18417	0.000925972	0.0175844	1	ACC1_ARATH	90.86	1.03e-108	Acetyl-CoA carboxylase 1	BAF01346.1	90.86	3.39e-109	AT1G36160.2	90.909	1.85e-108	acetyl-CoA carboxylase 1				COG0124	ath:AT3G02760`KO:K01892
1	28517.c0.g1.i1	125.98	2.47	0.06	0	-4.75414	0.0180053	-5.29275	0.194126	-1.77846	1	GATP_ARATH	70.787	2.08e-80	Gamma-aminobutyrate transaminase POP2, mitochondrial {ECO:0000303|Ref.1}	ESQ47651.1	75.706	3.97e-88	AT3G22200.1	70.787	2.85e-80	Pyridoxal phosphate (PLP)-dependent transferases superfamily protein						GO:0005575,GO:0005739,GO:0043226,GO:0043227,GO:0043229,GO:0043231,GO:0044424,GO:0044444,GO:0044464
1	28526.c0.g1.i5	29.47	20.74	7.03	6.08	0.414829	1	-2.09549	0.0381134	0.047336	1	ATG1A_ARATH	99.187	1.37e-84	Serine/threonine-protein kinase ATG1a {ECO:0000305}	BAH56854.1	99.187	8.84e-83	AT3G61960.2	99.187	1.49e-84	Protein kinase superfamily protein
1	28542.c0.g1.i1	17.43	0.08	0	0	-6.65616	5.35e-06	-2.01612	1	0	1	PSY2_ARATH	73.239	1.43e-19	Protein PSY2	XP_013626585.1	77.465	6.26e-21	AT3G47295.1	73.611	9.11e-20	hypothetical protein	PF13456.5					GO:0000123,GO:0000812,GO:0000988,GO:0000989,GO:0003674,GO:0003676,GO:0003677,GO:0003712,GO:0003714,GO:0005488,GO:0005575,GO:0005634,GO:0006139,GO:0006259,GO:0006281,GO:0006325,GO:0006338,GO:0006351,GO:0006355,GO:0006464,GO:0006473,GO:0006475,GO:0006725,GO:0006807,GO:0006950,GO:0006974,GO:0008150,GO:0008152,GO:0009058,GO:0009059,GO:0009889,GO:0009890,GO:0009892,GO:0009987,GO:0010468,GO:0010556,GO:…
1	28545.c0.g1.i1	7.48	0.21	0	0	-4.09829	0.000228238	-3.40294	1	0	1					XP_002884557.2	86.538	4.26e-82	AT3G06070.1	85.065	3.46e-77	hypothetical protein
1	28560.c0.g1.i2	16.61	0.28	4.23	2.57	-4.8204	3.38e-06	3.21492	0.0129785	-0.485381	1	MARD1_ARATH	47.917	1.96e-08	Protein MARD1 {ECO:0000303|PubMed:15159630}	AAL62362.1	65.909	2.69e-37	AT1G22160.1	66.165	1.8e-39	senescence-associated family protein (DUF581)	PF07714.16
1	28564.c0.g2.i2	19.61	2.94	2.41	2.04	-1.77382	0.0244701	-0.836657	1	-0.0413178	1	ATS3A_ARATH	87.857	1.45e-82	Embryo-specific protein ATS3A {ECO:0000305}	XP_010517640.1	91.367	3.09e-86	AT2G41475.1	87.943	1.46e-82	Embryo-specific protein 3 (ATS3)
1	28568.c0.g1.i3	8.43	4.8	1.42	1.2	0.194426	1	-2.26705	0.0118273	0.0109992	1	Y5520_ARATH	84.516	1.33e-85	Uncharacterized aarF domain-containing protein kinase At5g05200, chloroplastic	Q9ASX5.1	84.516	2.22e-83	AT5G05200.1	84.516	1.82e-85	Protein kinase superfamily protein	PF14009.5	sigP:1^18^0.718^YES
1	28577.c0.g1.i1	14.24	1.12	2.23	1.03	-2.71064	0.000447468	0.383817	1	-0.776522	1	ICR2_ARATH	89.822	0	Interactor of constitutive active ROPs 2, chloroplastic	EOA26791.1	91.858	0	AT2G37080.3	89.822	0	ROP interactive partner 3				COG0515	ath:AT3G23750
1	28579.c0.g1.i1	100.42	14.6	12.18	9.6	-1.93936	0.0121461	-0.793691	0.887426	-0.110132	1	FK152_ARATH	91.603	2.84e-78	Peptidyl-prolyl cis-trans isomerase FKBP15-2	Q38936.2	91.603	4.74e-76	AT5G48580.1	91.603	3.92e-78	FK506- and rapamycin-binding protein 15 kD-2				ENOG41113M5	ath:AT4G02000
1	28589.c0.g1.i4	106.37	11.02	0.12	0.24	-2.47142	0.112437	-6.78012	4.53e-05	1.18012	1	6PGL3_ARATH	88.095	6e-168	Probable 6-phosphogluconolactonase 3	AAM61753.1	88.492	1.06e-166	AT5G24420.1	88.142	2.65e-168	6-phosphogluconolactonase 5				ENOG410XTFH	ath:AT3G42180`KO:K18789	GO:0000785,GO:0003674,GO:0003682,GO:0004871,GO:0004872,GO:0005085,GO:0005488,GO:0005515,GO:0005575,GO:0005634,GO:0005829,GO:0006464,GO:0006807,GO:0008150,GO:0008152,GO:0009314,GO:0009411,GO:0009416,GO:0009605,GO:0009628,GO:0009649,GO:0009881,GO:0009987,GO:0010224,GO:0018298,GO:0019538,GO:0036211,GO:0038023,GO:0042752,GO:0042802,GO:0042803,GO:0043170,GO:0043226,GO:0043227,GO:0043229,GO:0043231,GO:…
1	28591.c0.g1.i2	9.61	0.15	0	0	-4.96625	7.86e-05	-3.33806	1	0	1	SCP51_ARATH	85.507	2.56e-37	Serine carboxypeptidase-like 51	AEC08058.1	85.507	9.44e-36	AT2G27920.2	85.714	8.49e-38	serine carboxypeptidase-like 51
1	28594.c0.g1.i3	8.87	0.09	0.06	0.04	-5.75205	4.32e-09	-1.02385	1	-0.272696	1	U86A2_ARATH	92.116	0	UDP-glycosyltransferase 86A2	OAP08907.1	92.324	0	AT2G28080.1	92.133	0	UDP-Glycosyltransferase superfamily protein						GO:0000166,GO:0003674,GO:0003824,GO:0004672,GO:0004674,GO:0004713,GO:0004714,GO:0004871,GO:0004872,GO:0004888,GO:0005488,GO:0005496,GO:0005515,GO:0005524,GO:0005575,GO:0005886,GO:0008289,GO:0016020,GO:0016021,GO:0016301,GO:0016740,GO:0016772,GO:0016773,GO:0017076,GO:0019199,GO:0030554,GO:0031224,GO:0032553,GO:0032555,GO:0032559,GO:0035639,GO:0036094,GO:0038023,GO:0043167,GO:0043168,GO:0044425,GO:…
1	28598.c0.g1.i1	45.78	4.72	8.12	5.91	-2.39921	0.0100696	0.250349	1	-0.313252	1					EOA35901.1	93.939	6.13e-30	AT1G77350.2	92.537	3.8e-31	keratinocyte-associated-like protein
1	28606.c1.g1.i1	202.78	0.16	0.06	0.12	-9.09279	3.38e-10	-1.62054	1	1.00238	1	ESFL2_ARATH	48.837	2.1e-16	EMBRYO SURROUNDING FACTOR 1-like protein 2	XP_019085927.1	48.837	1.35e-16	AT1G10715.1	48.837	2.87e-16	EMBRYO SURROUNDING FACTOR-like protein	PF00071.21					GO:0000166,GO:0003674,GO:0005488,GO:0005524,GO:0005575,GO:0005739,GO:0006457,GO:0008150,GO:0009987,GO:0017076,GO:0030554,GO:0032553,GO:0032555,GO:0032559,GO:0035639,GO:0036094,GO:0042026,GO:0043167,GO:0043168,GO:0043226,GO:0043227,GO:0043229,GO:0043231,GO:0044424,GO:0044444,GO:0044464,GO:0097159,GO:0097367,GO:1901265,GO:1901363
1	28643.c0.g1.i2	14.7	1.46	1.2	1.97	-2.36156	0.0221649	-0.901244	1	0.976002	1					XP_020873666.1	63.542	9.94e-107	AT4G21895.2	63.542	2.09e-72	DNA binding protein
1	28669.c0.g1.i1	9.85	0.48	0.31	0.88	-3.52166	0.00725154	-1.15368	1	1.78313	1					XP_024010159.1	46.809	9.76e-26	AT2G10975.1	65.385	2.32e-14	hypothetical protein
1	28670.c1.g1.i3	8.36	1.34	0	0	-1.91419	0.551906	-6.66285	0.0176256	0	1	PPSP2_ARATH	81.919	2.39e-157	Inorganic pyrophosphatase 2	EFH69223.1	82.657	9.78e-158	AT1G17710.1	81.919	3.3e-157	Pyridoxal phosphate phosphatase-related protein						GO:0000166,GO:0003674,GO:0003824,GO:0005215,GO:0005488,GO:0005575,GO:0005774,GO:0006810,GO:0006811,GO:0006812,GO:0008150,GO:0008324,GO:0015075,GO:0015399,GO:0015405,GO:0016020,GO:0016021,GO:0016462,GO:0016787,GO:0016817,GO:0016818,GO:0016820,GO:0016887,GO:0017111,GO:0019829,GO:0022804,GO:0022853,GO:0022857,GO:0022891,GO:0022892,GO:0030001,GO:0031090,GO:0031224,GO:0036094,GO:0042623,GO:0042625,GO:…
1	28676.c0.g1.i2	34.62	5.56	0.85	1.83	-1.78366	0.0585445	-3.16245	0.00156266	1.38473	1	MARD1_ARATH	41.509	1.84e-07	Protein MARD1 {ECO:0000303|PubMed:15159630}	EFH42907.1	88.496	2.04e-69	AT5G65040.1	87.719	5.38e-71	senescence-associated family protein (DUF581)
1	28677.c0.g1.i13	71.66	1.38	0.62	1.14	-4.90385	1.28e-10	-1.62989	0.203889	1.09972	1	TPT_ARATH	93.029	0	Triose phosphate/phosphate translocator TPT, chloroplastic	XP_010441627.1	92.453	0	AT5G46110.4	93.029	0	Glucose-6-phosphate/phosphate translocator-like protein	PF00320.26
1	28687.c2.g1.i1	32.88	1.67	0.07	0.08	-3.40365	0.00629929	-4.65154	0.0254133	0.234419	1	ATL72_ARATH	83.889	4.13e-87	RING-H2 finger protein ATL72	Q9SG96.1	83.889	6.89e-85	AT3G10910.1	83.978	4.16e-87	RING/U-box superfamily protein				ENOG410XQTV	ath:AT3G54030
1	28690.c0.g1.i2	89.73	3.98	20.07	19.62	-3.58439	1.23e-07	1.75671	0.0189307	0.214891	1	RK21_ARATH	91.457	1.16e-119	50S ribosomal protein L21, chloroplastic	EFH67457.1	91.96	8.41e-118	AT1G35680.1	91.457	1.6e-119	Ribosomal protein L21
1	28697.c0.g1.i1	10.94	1.6	4.17	2.12	-1.90376	0.0148445	0.838009	0.900709	-0.692364	1					XP_010513811.1	92.381	6.82e-92	AT2G01080.1	89.72	5.64e-91	Late embryogenesis abundant (LEA) hydroxyproline-rich glycoprotein family
1	28699.c0.g1.i1	32.99	0	0	0	-8.78254	4.25e-05	5.13e-15	1	0	1	DEF43_ARATH	54.43	5.93e-21	Defensin-like protein 43	Q2V4J5.1	54.43	9.88e-19	AT1G32763.1	54.43	8.12e-21	Cysteine-rich protein				ENOG410Z2D0	ath:AT1G16930	GO:0000166,GO:0003674,GO:0003824,GO:0004777,GO:0005488,GO:0005507,GO:0005575,GO:0005739,GO:0005759,GO:0006082,GO:0006105,GO:0006520,GO:0006536,GO:0006538,GO:0006540,GO:0006807,GO:0006950,GO:0008150,GO:0008152,GO:0009013,GO:0009056,GO:0009063,GO:0009064,GO:0009065,GO:0009266,GO:0009314,GO:0009408,GO:0009416,GO:0009448,GO:0009450,GO:0009507,GO:0009532,GO:0009536,GO:0009570,GO:0009628,GO:0009987,GO:…
1	28707.c0.g1.i2	22.71	2.64	6.16	5.58	-2.09402	0.0448366	0.59881	1	0.105114	1	RHD3_ARATH	93.284	1.68e-72	Protein ROOT HAIR DEFECTIVE 3 {ECO:0000255|HAMAP-Rule:MF_03109}	XP_009135341.1	91.791	1.24e-72	AT3G13870.2	93.284	5.64e-73	Root hair defective 3 GTP-binding protein (RHD3)
1	28708.c0.g1.i2	30.47	2.16	0.81	0.8	-2.94489	0.00120924	-1.95418	0.0741662	0.198896	1
1	28708.c0.g2.i3	108.51	1.87	0.09	0.38	-5.0518	1.96e-08	-4.5853	0.000739241	2.00204	1															ENOG4110X8D	ath:AT4G03030
1	28709.c0.g1.i1	14.33	0.16	0	0.28	-5.20804	0.000415359	-2.01881	1	2.79721	1	CSLA2_ARATH	98.519	1.81e-92	Glucomannan 4-beta-mannosyltransferase 2	XP_019090633.1	98.519	2.85e-91	AT5G22740.1	98.519	2.48e-92	cellulose synthase-like A02				COG0317	ath:AT3G14050`KO:K00951	GO:0000159,GO:0000278,GO:0003674,GO:0005575,GO:0005829,GO:0006464,GO:0006470,GO:0006793,GO:0006796,GO:0006807,GO:0007049,GO:0008150,GO:0008152,GO:0008287,GO:0009987,GO:0016311,GO:0019208,GO:0019538,GO:0019888,GO:0030234,GO:0032502,GO:0032991,GO:0036211,GO:0043170,GO:0043412,GO:0044237,GO:0044238,GO:0044260,GO:0044267,GO:0044424,GO:0044444,GO:0044464,GO:0044699,GO:0044763,GO:0070262,GO:0071704,GO:…
1	28745.c0.g1.i5	175.94	5.17	0.63	0.48	-4.27229	3.74e-08	-3.48986	0.00202932	-0.252073	1														ExpAA=25.89^PredHel=1^Topology=i71-93o
1	28759.c0.g1.i5	6.66	0.39	0.28	0	-3.0891	0.0261026	-1.02854	1	-3.04949	1	PRE3_ARATH	92	1.85e-25	Transcription factor PRE3	EFH65240.1	94	1e-23	AT1G74500.1	92.157	1.86e-25	activation-tagged BRI1(brassinosteroid-insensitive 1)-suppressor 1
1	28765.c0.g1.i4	345.61	24.27	22.85	25.6	-2.9867	1.81e-06	-0.595102	1	0.412995	1					XP_010494112.1	77.879	0	AT5G28830.1	75.61	4.2e-175	calcium-binding EF hand family protein
1	28768.c0.g1.i1	21.04	0.26	0.25	0.18	-5.27636	1.33e-06	-0.417657	1	-0.256975	1					XP_010456511.2	80.645	1.4e-102	AT5G12950.1	80.108	1.15e-100	proline-tRNA ligase (DUF1680)		sigP:1^20^0.868^YES		ENOG410Y973	ath:AT4G13340	GO:0000166,GO:0003674,GO:0003824,GO:0005488,GO:0006576,GO:0006595,GO:0006598,GO:0006807,GO:0008150,GO:0008152,GO:0008215,GO:0009056,GO:0009308,GO:0009310,GO:0009987,GO:0016491,GO:0016645,GO:0016647,GO:0034641,GO:0036094,GO:0042402,GO:0043167,GO:0043168,GO:0044106,GO:0044237,GO:0046208,GO:0046592,GO:0048037,GO:0050660,GO:0050662,GO:0052894,GO:0052895,GO:0052901,GO:0071704,GO:0097159,GO:0097164,GO:…
1	28768.c0.g2.i1	57.17	0.68	0.68	0.78	-4.99554	0.015036	-0.298517	1	0.198832	1					XP_018476767.1	84.884	1.42e-40	AT5G12950.1	80.233	3.38e-41	proline-tRNA ligase (DUF1680)				ENOG410XPFM	ath:AT2G30050`KO:K14004
1	28768.c0.g3.i1	141.17	0.96	2.01	1.55	-6.2438	7.28e-15	0.466657	1	-0.172867	1					XP_010492033.1	74	1.68e-66	AT5G12950.1	72	3.54e-65	proline-tRNA ligase (DUF1680)
1	28769.c0.g2.i1	63.94	7.64	36.03	31.41	-2.1466	0.00795168	1.64529	0.0345725	0.0562527	1					EFH52116.1	84.559	1.35e-75	AT3G47650.1	84.672	2.32e-77	DnaJ/Hsp40 cysteine-rich domain superfamily protein	PF04398.11
1	28771.c1.g1.i5	5.66	0.06	0.36	0.07	-5.68758	8.37e-05	1.882	0.633549	-2.01283	1	TSA1_ARATH	68.992	5.08e-162	TSK-associating protein 1	XP_020867897.1	69.231	0	AT1G52410.2	69.052	5.1e-162	TSK-associating protein 1
1	28796.c0.g1.i1	70.81	8.2	3.26	1.45	-2.25172	0.00215651	-1.81775	0.0790071	-0.954277	1					AAD20904.2	99.286	2.63e-85	AT2G20930.1	99.291	1.58e-87	SNARE-like superfamily protein
1	28809.c0.g1.i3	21.5	0.44	0.05	0	-4.72329	4.1e-07	-3.10673	0.553881	-1.77847	1					EFH53043.1	88.462	2.03e-46	AT2G01913.1	86.923	2.71e-42	hypothetical protein						GO:0000166,GO:0002376,GO:0003674,GO:0005488,GO:0005515,GO:0005524,GO:0006950,GO:0006952,GO:0006955,GO:0007165,GO:0008150,GO:0009605,GO:0009607,GO:0009620,GO:0009814,GO:0009817,GO:0009987,GO:0017076,GO:0030554,GO:0032553,GO:0032555,GO:0032559,GO:0035639,GO:0036094,GO:0043167,GO:0043168,GO:0043207,GO:0043531,GO:0045087,GO:0050789,GO:0050794,GO:0050832,GO:0050896,GO:0051704,GO:0051707,GO:0065007,GO:…
1	28819.c0.g1.i3	50.42	1.28	3.36	2.48	-4.4181	1.54e-11	0.842855	0.887397	-0.163322	1	TKPR2_ARATH	70.423	4.2e-127	Tetraketide alpha-pyrone reductase 2	EOA38086.1	86.574	3.27e-155	AT1G25460.1	85.308	1.61e-153	NAD(P)-binding Rossmann-fold superfamily protein				ENOG410Z7Z7	ath:AT2G38420
1	28822.c1.g2.i1	55.59	2.57	0.41	0.29	-3.57991	1.16e-06	-3.0704	0.0182681	-0.160512	1	BGAL1_ARATH	95.098	1.09e-63	Beta-galactosidase 1	BAD95407.1	95.098	9.46e-66	AT3G13750.1	95.146	3.86e-64	beta galactosidase 1				COG4886		GO:0000228,GO:0005575,GO:0005694,GO:0006139,GO:0006259,GO:0006281,GO:0006325,GO:0006337,GO:0006338,GO:0006351,GO:0006355,GO:0006357,GO:0006725,GO:0006807,GO:0006950,GO:0006974,GO:0007049,GO:0008150,GO:0008152,GO:0009058,GO:0009059,GO:0009889,GO:0009987,GO:0010468,GO:0010556,GO:0016043,GO:0016070,GO:0018130,GO:0019219,GO:0019222,GO:0019438,GO:0022411,GO:0031323,GO:0031326,GO:0032774,GO:0032984,GO:…
1	28846.c0.g1.i2	33.13	8.24	0.05	0.21	-1.1056	0.631397	-7.30272	3.09e-09	1.8943	1	CAN1_ARATH	94.04	4.31e-103	Staphylococcal-like nuclease CAN1	EOA24383.1	95.364	7.28e-102	AT3G56170.1	94.04	5.95e-103	Ca-2+ dependent nuclease						GO:0003674,GO:0005215,GO:0005342,GO:0005575,GO:0005739,GO:0006810,GO:0006811,GO:0006820,GO:0008028,GO:0008150,GO:0008509,GO:0008514,GO:0008643,GO:0009507,GO:0009526,GO:0009528,GO:0009536,GO:0009941,GO:0015075,GO:0015120,GO:0015121,GO:0015144,GO:0015291,GO:0015297,GO:0015301,GO:0015605,GO:0015711,GO:0015713,GO:0015714,GO:0015718,GO:0015748,GO:0015849,GO:0016020,GO:0016021,GO:0019866,GO:0022804,GO:…
1	28859.c0.g1.i3	16.62	2.2	2.03	1.64	-1.9794	0.00434994	-0.664009	1	-0.0629151	1	HIS6B_ARATH	95.498	0	Histidinol-phosphate aminotransferase 2, chloroplastic	B9DHD3.1	95.498	0	AT5G10330.2	95.513	0	histidinol phosphate aminotransferase 1
1	28868.c0.g1.i4	124.62	0.82	2.86	5.3	-6.32256	1.44e-15	1.22196	0.880516	1.14318	1	PLAS1_ARATH	87.647	1.65e-101	Plastocyanin minor isoform, chloroplastic	AAF17650.1	76.214	1.27e-102	AT1G76100.2	75.962	8.03e-105	plastocyanin 1	PF00072.23					GO:0000184,GO:0000381,GO:0000956,GO:0003674,GO:0003676,GO:0003723,GO:0003729,GO:0005488,GO:0005575,GO:0005654,GO:0005730,GO:0005737,GO:0006139,GO:0006396,GO:0006397,GO:0006401,GO:0006402,GO:0006417,GO:0006725,GO:0006807,GO:0006810,GO:0008150,GO:0008152,GO:0008380,GO:0009056,GO:0009057,GO:0009889,GO:0009892,GO:0009893,GO:0009987,GO:0010468,GO:0010556,GO:0010604,GO:0010605,GO:0010608,GO:0010628,GO:…
1	28868.c0.g2.i2	196.32	0.95	0.28	0.31	-6.82897	4.34e-15	-2.17723	0.60271	0.245675	1	PLAS2_ARATH	90.419	3.23e-93	Plastocyanin major isoform, chloroplastic	EOA36678.1	92.216	3.92e-91	AT1G20340.1	90.476	4.13e-93	Cupredoxin superfamily protein				COG0369	ath:AT3G02280	GO:0000166,GO:0000287,GO:0003674,GO:0003824,GO:0004448,GO:0004450,GO:0005488,GO:0005575,GO:0005739,GO:0006082,GO:0006099,GO:0006101,GO:0006102,GO:0008150,GO:0008152,GO:0009507,GO:0009532,GO:0009534,GO:0009536,GO:0009570,GO:0009579,GO:0009987,GO:0016491,GO:0016614,GO:0016616,GO:0019752,GO:0031976,GO:0031984,GO:0036094,GO:0043167,GO:0043169,GO:0043226,GO:0043227,GO:0043229,GO:0043231,GO:0043436,GO:…
1	28868.c0.g3.i1	57.94	1.17	0.05	0.15	-4.74541	2.54e-10	-4.6668	0.00538407	1.5148	1	PLAS2_ARATH	92.814	3.7e-94	Plastocyanin major isoform, chloroplastic	P42699.2	92.814	6.17e-92	AT1G20340.1	92.857	3.09e-94	Cupredoxin superfamily protein				COG1071	ath:AT1G24180`KO:K00161
1	28877.c1.g2.i3	190.15	18.76	21.8	22.93	-2.48014	0.00151931	-0.364507	1	0.321106	1	PSRP6_ARATH	89.908	2.32e-65	50S ribosomal protein 6, chloroplastic	OAO93397.1	91.228	2.55e-70	AT5G17870.2	89.565	8.92e-69	plastid-specific 50S ribosomal protein 6						GO:0000139,GO:0000271,GO:0003674,GO:0003824,GO:0005575,GO:0005794,GO:0005975,GO:0005976,GO:0008150,GO:0008152,GO:0008194,GO:0009058,GO:0009059,GO:0009987,GO:0010383,GO:0010393,GO:0010410,GO:0010413,GO:0010417,GO:0016020,GO:0016021,GO:0016043,GO:0016051,GO:0016740,GO:0016757,GO:0016758,GO:0031090,GO:0031224,GO:0033692,GO:0034637,GO:0034645,GO:0043170,GO:0043226,GO:0043227,GO:0043229,GO:0043231,GO:…
1	28883.c1.g1.i1	36.78	0	0	0	-6.56306	0.0032735	5.13e-15	1	0	1	PGLR4_ARATH	50	5.16e-22	Polygalacturonase At1g48100	EOA40072.1	96.25	1.22e-46	AT1G10640.1	88.75	2.98e-45	Pectin lyase-like superfamily protein						GO:0003674,GO:0005488,GO:0005515
1	28888.c0.g1.i1	67.12	1.38	0.7	1.04	-4.70474	1.95e-11	-1.4767	0.619647	0.685166	1	TL16_ARATH	90.71	1.49e-96	Thylakoid lumenal 16.5 kDa protein, chloroplastic	ANM66839.1	90	6.55e-97	AT4G02530.3	90	5.42e-99	chloroplast thylakoid lumen protein			ExpAA=21.34^PredHel=1^Topology=i21-43o
1	28893.c0.g1.i1	24.31	0.84	1.05	0.6	-3.97523	1.76e-06	-0.182926	1	-0.540816	1	CDPKD_ARATH	95.89	1.1e-151	Calcium-dependent protein kinase 13	Q8W4I7.2	95.89	1.84e-149	AT3G51850.1	95.909	1.11e-151	calcium-dependent protein kinase 13
1	28912.c0.g2.i2	65.83	7.96	7.08	5.7	-2.11935	0.00411314	-0.725027	1	-0.0883351	1	RUXG_ARATH	59.843	2.71e-41	Probable small nuclear ribonucleoprotein G	O82221.1	59.843	4.51e-39	AT2G23930.1	59.843	3.72e-41	Putative small nuclear ribonucleoprotein G
1	28929.c0.g1.i4	16.16	1.59	0.14	0.34	-2.32821	0.0386573	-3.93182	0.000449789	1.60973	1					EFH68047.1	72.185	1.48e-67	AT1G54095.1	71.523	2.5e-68	DUF1677 family protein putative (DUF1677)
1	28931.c0.g1.i1	51.63	0.97	0.07	0	-4.76449	4.44e-05	-3.86945	0.225454	-1.77615	1	AB22G_ARATH	96.46	8.17e-160	ABC transporter G family member 22	ANM68763.1	96.46	6.82e-160	AT5G06530.4	96.46	5.65e-162	ABC-2 type transporter family protein
1	28932.c0.g1.i1	18.51	9.46	0.78	1.15	-0.0728784	1	-4.07986	4.88e-07	0.876731	1	TET8_ARATH	90.476	8.15e-139	Tetraspanin-8	EFH56788.1	90.842	9.39e-143	AT2G23810.1	90.511	8.21e-139	tetraspanin8				ENOG410XQYV	ath:AT5G04500
1	28934.c0.g1.i2	9.16	1.4	0.06	0.03	-1.7219	0.103879	-4.71239	0.000232414	-0.541889	1	Y1465_ARATH	30.159	1.65e-07	Late embryogenesis abundant protein At1g64065 {ECO:0000305}	AAC62891.1	81.081	1.59e-102	AT2G46150.1	81.166	9.57e-105	Late embryogenesis abundant (LEA) hydroxyproline-rich glycoprotein family					ath:AT5G06980
1	28946.c0.g1.i1	172.81	33.55	0.57	0.3	-1.62471	0.285011	-6.20426	8.43e-06	-0.673448	1	CCH_ARATH	86.885	2.78e-50	Copper transport protein CCH	EOA24810.1	62.032	2.24e-52	AT3G56240.3	86.992	2.79e-50	copper chaperone						GO:0003674,GO:0005215,GO:0005575,GO:0005887,GO:0006810,GO:0008104,GO:0008150,GO:0009628,GO:0015031,GO:0015197,GO:0015198,GO:0015833,GO:0016020,GO:0016021,GO:0022857,GO:0022891,GO:0022892,GO:0031224,GO:0031226,GO:0033036,GO:0035673,GO:0042886,GO:0042887,GO:0044425,GO:0044459,GO:0044464,GO:0045184,GO:0050896,GO:0051179,GO:0051234,GO:0055085,GO:0071702,GO:0071705,GO:0080167,GO:1904680
1	28951.c0.g2.i1	82.02	12.44	0.47	0.65	-1.84331	0.0217252	-5.13865	1.74e-09	0.640772	1	Y5161_ARATH	48.78	6.01e-42	Uncharacterized protein At5g01610	AAD17440.1	94.972	3.35e-109	AT2G03350.1	95	2.02e-111	DUF538 family protein (Protein of unknown function DUF538)
1	28953.c0.g1.i1	11.27	4.63	0.26	0.11	-0.395962	1	-4.54161	0.000270721	-1.05905	1	CML19_ARATH	84.677	5.68e-67	Calcium-binding protein CML19 {ECO:0000303|Ref.7}	O23184.1	84.677	9.48e-65	AT4G37010.1	84.8	5.72e-67	centrin 2	PF00249.30
1	28964.c0.g1.i3	161.9	2.68	0.08	0.17	-5.04236	1.66e-08	-4.92664	0.00432156	1.02016	1	NLTP4_ARATH	88.393	1.92e-66	Non-specific lipid-transfer protein 4	EOA14181.1	92.92	8.55e-69	AT5G59310.1	88.496	1.92e-66	lipid transfer protein 4
1	28964.c0.g2.i1	105.02	2.44	0.05	0	-4.61606	2.02e-05	-5.34977	0.0205597	-1.77851	1	NLTP4_ARATH	86.607	1.87e-57	Non-specific lipid-transfer protein 4	EOA14181.1	77.778	6.28e-71	AT5G59310.1	86.726	1.87e-57	lipid transfer protein 4	PF02365.14			COG5398	ath:AT2G26670`KO:K21480	GO:0003674,GO:0003676,GO:0003723,GO:0003824,GO:0004518,GO:0004519,GO:0005488,GO:0005575,GO:0006139,GO:0006396,GO:0006397,GO:0006725,GO:0006807,GO:0008150,GO:0008152,GO:0008270,GO:0009451,GO:0009507,GO:0009536,GO:0009987,GO:0016070,GO:0016071,GO:0016787,GO:0016788,GO:0031425,GO:0034641,GO:0043167,GO:0043169,GO:0043170,GO:0043226,GO:0043227,GO:0043229,GO:0043231,GO:0043412,GO:0044237,GO:0044238,GO:…
1	28969.c0.g1.i2	5.77	1.98	0.14	0.05	-0.785846	1	-4.1444	0.0468602	-1.07099	1	HHP1_ARATH	82.727	1.63e-123	Heptahelical transmembrane protein 1	XP_020876653.1	81.982	4.44e-122	AT5G20270.1	82.727	2.25e-123	heptahelical transmembrane protein1
1	28972.c0.g1.i1	23.95	3.34	5.62	3.74	-1.89797	0.026458	0.168769	1	-0.355908	1	RK35_ARATH	96.875	1.03e-24	50S ribosomal protein L35, chloroplastic {ECO:0000305}	XP_010429364.1	98.438	4.21e-23	AT2G24090.1	96.923	1.05e-24	Ribosomal protein L35
1	28977.c0.g1.i5	6.57	0	0	0	-7.08295	0.00142508	5.13e-15	1	0	1	DF200_ARATH	40.741	1e-11	Defensin-like protein 200	A8MRC8.1	40.741	1.67e-09	AT5G59105.1	40.741	1.37e-11	Defensin-like (DEFL) family protein						GO:0000975,GO:0000981,GO:0000988,GO:0000989,GO:0001067,GO:0001071,GO:0001076,GO:0001101,GO:0001134,GO:0001135,GO:0003006,GO:0003674,GO:0003676,GO:0003677,GO:0003700,GO:0005488,GO:0005575,GO:0005634,GO:0006139,GO:0006351,GO:0006355,GO:0006357,GO:0006725,GO:0006807,GO:0008150,GO:0008152,GO:0009058,GO:0009059,GO:0009719,GO:0009725,GO:0009751,GO:0009753,GO:0009791,GO:0009889,GO:0009908,GO:0009909,GO:…
1	28989.c0.g1.i4	303.89	3.7	0.69	0.66	-5.55463	2.41e-08	-2.80519	0.103824	0.140497	1					XP_010449797.1	78.313	5.11e-78	AT4G16410.1	78.495	1.03e-71	transmembrane protein	PF13472.5
1	28990.c0.g1.i1	297.63	0.64	0.1	0.12	-7.9817	5.19e-22	-2.85192	0.244724	0.240564	1	FLA5_ARATH	62.646	2.73e-104	Fasciclin-like arabinogalactan protein 5	OAO97545.1	62.03	2.14e-102	AT4G31370.1	62.791	4.64e-104	FASCICLIN-like arabinogalactan protein 5 precursor				ENOG410XTFH	ath:AT3G07620
1	28990.c0.g2.i1	6.18	0	0	0.03	-8.50737	5.83e-05	5.13e-15	1	2.01178	1	FLA5_ARATH	76.062	9.8e-116	Fasciclin-like arabinogalactan protein 5	EOA19145.1	82.482	4.53e-129	AT4G31370.1	76.062	1.35e-115	FASCICLIN-like arabinogalactan protein 5 precursor						GO:0000184,GO:0000212,GO:0000226,GO:0000723,GO:0000932,GO:0000956,GO:0003674,GO:0003676,GO:0003677,GO:0003723,GO:0003824,GO:0004518,GO:0004540,GO:0005488,GO:0005575,GO:0005634,GO:0005697,GO:0006139,GO:0006259,GO:0006278,GO:0006401,GO:0006402,GO:0006405,GO:0006406,GO:0006725,GO:0006807,GO:0006810,GO:0006913,GO:0006950,GO:0006952,GO:0006996,GO:0007004,GO:0007010,GO:0007017,GO:0007049,GO:0007051,GO:…
1	28992.c0.g1.i2	27.85	13.63	2.56	1.3	-0.20883	1	-2.91662	0.000548093	-0.75917	1	SC5D1_ARATH	91.358	7.71e-48	Delta(7)-sterol-C5(6)-desaturase 1	XP_019092753.1	91.358	2.82e-46	AT3G02580.1	91.358	1.06e-47	sterol 1				ENOG41108PK	ath:AT4G04775
1	29005.c0.g1.i1	20.99	1.55	1	0.91	-2.92281	0.000123114	-1.1429	0.663913	0.154959	1	PGR_ARATH	90.5	4.71e-105	Protein PGR {ECO:0000303|Ref.6}	XP_010454283.1	89	2.29e-107	AT5G19930.2	90.547	4.74e-105	integral membrane protein (Protein of unknown function DUF92 transmembrane)
1	29016.c1.g3.i1	88	10.75	1.99	6.08	-2.12255	0.0125989	-2.84954	0.0300065	1.72102	1	RCA_ARATH	91.209	1.19e-43	Ribulose bisphosphate carboxylase/oxygenase activase, chloroplastic	EOA27029.1	92.308	1.93e-42	AT2G39730.2	91.209	9.62e-44	rubisco activase
1	29025.c0.g1.i2	29.23	0.58	0.16	0.11	-4.76114	1.86e-11	-2.36992	0.0962138	-0.183145	1	CPPM_ARATH	84.483	1.1e-103	Carboxyvinyl-carboxyphosphonate phosphorylmutase, chloroplastic	ESQ34655.1	80.605	0	AT1G21440.2	97.143	1.09e-117	Phosphoenolpyruvate carboxylase family protein
1	29028.c0.g2.i2	13.39	0	0	0	-8.08097	3.31e-05	5.13e-15	1	0	1	RC23_ARATH	95.775	5.12e-43	UPF0057 membrane protein At4g30650	AFK81277.1	95.775	3.26e-41	AT4G30650.1	95.775	7.03e-43	Low temperature and salt responsive protein family						GO:0003674,GO:0003824,GO:0005575,GO:0005622,GO:0005768,GO:0016491,GO:0031082,GO:0031083,GO:0031410,GO:0031982,GO:0032991,GO:0043226,GO:0043227,GO:0043229,GO:0043234,GO:0044424,GO:0044444,GO:0044445,GO:0044464,GO:0097708
1	29034.c0.g1.i1	10.58	1.42	2.19	1.66	-2.05629	0.0149261	0.124015	1	-0.137119	1	GMPP2_ARATH	27.682	1.28e-45	Probable mannose-1-phosphate guanylyltransferase 2	AEC05852.1	83.12	0	AT2G04650.1	83.156	0	ADP-glucose pyrophosphorylase family protein
1	29042.c0.g1.i15	40.08	1.83	0.45	0.54	-3.62899	1.56e-05	-2.47422	0.0623688	0.472442	1	GLO1_ARATH	85.423	0	(S)-2-hydroxy-acid oxidase GLO1	AEE75516.1	87.172	0	AT3G14415.2	87.172	0	Aldolase-type TIM barrel family protein
1	29052.c0.g2.i3	7.73	0	0	0	-8.94693	1.58e-06	5.13e-15	1	0	1	GL19_ARATH	84.343	5.42e-120	Putative germin-like protein subfamily 1 member 9	XP_010435804.1	87.374	5.11e-119	AT5G38910.1	84.343	7.49e-120	RmlC-like cupins superfamily protein						GO:0003674,GO:0003676,GO:0003824,GO:0003964,GO:0004175,GO:0004190,GO:0004518,GO:0004519,GO:0005488,GO:0006139,GO:0006259,GO:0006310,GO:0006725,GO:0006807,GO:0008150,GO:0008152,GO:0008233,GO:0009987,GO:0015074,GO:0016740,GO:0016772,GO:0016779,GO:0016787,GO:0016788,GO:0034061,GO:0034641,GO:0043167,GO:0043169,GO:0043170,GO:0044237,GO:0044238,GO:0044260,GO:0046483,GO:0046872,GO:0070001,GO:0070011,GO:…
1	29061.c0.g1.i5	8	1.85	0.11	0	-1.2167	0.459585	-4.57298	6.31e-05	-3.42088	1	PMI10_ARATH	85.465	1.51e-101	Pectinesterase inhibitor 10 {ECO:0000305}	XP_010473498.1	87.209	6.46e-103	AT1G62760.1	85.549	5.33e-101	Plant invertase/pectin methylesterase inhibitor superfamily protein			ExpAA=96.54^PredHel=4^Topology=i23-45o71-93i114-136o164-186i	ENOG410XRDU	ath:AT5G01460`KO:K14617
1	29073.c0.g2.i2	21.75	0.32	0.19	0	-4.8655	0.00447621	-1.2863	1	-2.54725	1					OAP04433.1	83.962	1.45e-53	AT3G50900.1	84.112	1.25e-55	hypothetical protein			ExpAA=17.79^PredHel=1^Topology=i90-109o
1	29078.c0.g1.i2	39.52	6.56	0.03	0.11	-1.7042	0.278018	-7.45365	1.84e-06	1.52727	1	ATL23_ARATH	83.735	7.82e-94	E3 ubiquitin-protein ligase ATL23	Q8L9W3.2	83.735	1.3e-91	AT5G42200.1	83.832	3.75e-94	RING/U-box superfamily protein						GO:0001101,GO:0003674,GO:0003676,GO:0003723,GO:0005488,GO:0005515,GO:0005575,GO:0006139,GO:0006353,GO:0006364,GO:0006396,GO:0006397,GO:0006725,GO:0006807,GO:0008150,GO:0008152,GO:0009058,GO:0009059,GO:0009507,GO:0009536,GO:0009719,GO:0009725,GO:0009737,GO:0009987,GO:0010033,GO:0010239,GO:0016070,GO:0016071,GO:0016072,GO:0018130,GO:0019438,GO:0019843,GO:0031425,GO:0032774,GO:0033993,GO:0034470,GO:…
1	29080.c0.g2.i1	49.82	4.07	0.37	0.2	-2.75403	0.00174015	-3.77196	0.0102755	-0.571084	1	BGL13_ARATH	91.538	1.35e-83	Beta-glucosidase 13	XP_018483985.1	93.077	6.66e-83	AT5G44640.1	91.538	1.84e-83	beta glucosidase 13
1	29080.c0.g3.i2	40.03	2.3	0.15	0	-3.33698	0.00636506	-3.8262	0.414667	-1.77855	1	BGL15_ARATH	89.781	5.62e-90	Beta-glucosidase 15	ANM63069.1	89.781	1.91e-89	AT2G44450.2	89.781	1.58e-91	beta glucosidase 15
1	29088.c0.g1.i2	21.15	0.6	0.18	0	-4.10077	0.00150822	-2.12018	0.637266	-3.04861	1	AGO9_ARATH	80.749	2.61e-92	Protein argonaute 9	BAC42876.1	80.214	8.95e-95	AT5G21150.1	80.749	3.53e-92	Argonaute family protein
1	29098.c0.g2.i1	9.18	0.73	3.42	2.63	-2.67685	0.0229459	1.59447	0.605853	-0.0816409	1	MGDG1_ARATH	93.939	2.48e-84	Monogalactosyldiacylglycerol synthase 1, chloroplastic	XP_022555263.1	98.374	2.11e-84	AT4G31780.1	93.939	1.53e-85	monogalactosyl diacylglycerol synthase 1
1	29099.c0.g1.i1	29.51	11.26	0.58	0.58	-0.524613	1	-4.67014	2.41e-05	0.283952	1	ERG1_ORYSJ	44.805	5.42e-42	Elicitor-responsive protein 1	XP_010427320.1	89.809	1.86e-98	AT3G55470.1	87.342	5.54e-98	Calcium-dependent lipid-binding (CaLB domain) family protein
1	29110.c0.g1.i1	125.5	35.48	9.59	12.25	-1.01372	0.719257	-2.36566	0.0162215	0.553267	1					XP_010437254.1	90.741	9.31e-67	AT4G10300.1	82.569	9.16e-59	RmlC-like cupins superfamily protein
1	29110.c0.g3.i1	8.65	4.21	0.62	1.08	-0.139474	1	-3.16125	0.0397367	0.928564	1					XP_010437254.1	97.297	1.94e-17	AT4G10300.1	94.737	1.38e-19	RmlC-like cupins superfamily protein	PF00083.23
1	29123.c1.g1.i1	24.24	1.15	1.75	1.8	-3.54329	0.000125696	0.168043	1	0.297499	1	DRL35_ARATH	69.686	3.11e-125	Probable disease resistance protein At5g45490	OAO90524.1	63.587	7.8e-134	AT5G45490.2	69.686	4.3e-125	P-loop containing nucleoside triphosphate hydrolases superfamily protein
1	29126.c0.g1.i3	12.18	0.17	0.05	0	-5.19901	3.83e-10	-2.05493	1	-2.54878	1					XP_020871974.1	93.64	0	AT5G57700.4	90.877	0	BNR/Asp-box repeat family protein				COG0278	ath:AT4G04950	GO:0005575,GO:0005774,GO:0016020,GO:0016021,GO:0031090,GO:0031224,GO:0044422,GO:0044424,GO:0044425,GO:0044437,GO:0044444,GO:0044446,GO:0044464,GO:0098588,GO:0098805
1	29138.c0.g1.i8	25.27	0.84	0.02	0.12	-3.89214	6.16e-07	-5.14459	0.000326275	2.21465	1	ENL2_ARATH	61.417	6.77e-53	Early nodulin-like protein 2	EOA13460.1	75.926	9.63e-82	AT5G53870.1	82.443	1.61e-76	early nodulin-like protein 1
1	29142.c0.g1.i1	10.83	0.32	0	0	-4.13388	0.0141683	-5.63394	0.160694	0	1	U87A1_ARATH	79.186	0	UDP-glycosyltransferase 87A1	XP_010414299.1	81.441	0	AT2G30150.2	79.039	0	UDP-Glycosyltransferase superfamily protein
1	29155.c3.g1.i3	15.96	2.12	2.67	2.4	-2.01134	0.00668944	-0.220559	1	0.130059	1	MGDG1_ARATH	96.167	0	Monogalactosyldiacylglycerol synthase 1, chloroplastic	XP_010432818.1	97.909	0	AT4G31780.2	96.181	0	monogalactosyl diacylglycerol synthase 1
1	2918.c0.g1.i1	49.8	7.37	0.13	0.13	-1.85677	0.0675264	-6.00666	4e-07	0.201572	1	AGP14_ARATH	78.947	3.14e-23	Arabinogalactan protein 14 {ECO:0000303|PubMed:11006345}	XP_024012323.1	84.211	2.22e-23	AT5G56540.1	78.947	4.3e-23	arabinogalactan protein 14		sigP:1^21^0.867^YES		COG4870	ath:AT5G43060	GO:0000166,GO:0003674,GO:0005488,GO:0005524,GO:0005575,GO:0005886,GO:0006950,GO:0006952,GO:0007165,GO:0008150,GO:0009987,GO:0016020,GO:0017076,GO:0030554,GO:0032553,GO:0032555,GO:0032559,GO:0035639,GO:0036094,GO:0043167,GO:0043168,GO:0043531,GO:0044464,GO:0050789,GO:0050794,GO:0050896,GO:0065007,GO:0097159,GO:0097367,GO:1901265,GO:1901363
1	29196.c0.g1.i5	70.95	10.86	12.33	11.95	-1.80611	0.0222808	-0.402728	1	0.198901	1	PSA7B_ARATH	97.674	5.2e-20	Proteasome subunit alpha type-7-B	ABB18117.1	95.349	3.85e-18	AT5G66140.1	97.674	7.05e-20	proteasome alpha subunit D2
1	29209.c0.g1.i1	9.34	0.28	0.38	0.18	-4.05631	0.00040198	-0.0491877	1	-0.607681	1	HDG5_ARATH	87.619	1.55e-50	Homeobox-leucine zipper protein HDG5	XP_020871346.1	88.571	3.78e-49	AT5G46880.3	87.619	2.07e-50	homeobox-7
1	29211.c0.g1.i4	34.45	11.18	0.22	0.06	-0.69132	1	-5.82598	0.00486453	-1.44947	1	RLF1_ARATH	80.833	1.69e-63	Protein RALF-like 1	XP_013719253.1	79.688	6.32e-67	AT1G02900.1	80.833	2.32e-63	rapid alkalinization factor 1						GO:0005575,GO:0005794,GO:0043226,GO:0043227,GO:0043229,GO:0043231,GO:0044424,GO:0044444,GO:0044464
1	29212.c1.g2.i1	7.36	0.14	2.01	1.54	-4.69887	0.000349833	3.20008	0.0166915	-0.109009	1																	GO:0003674,GO:0005215,GO:0005488,GO:0005575,GO:0005743,GO:0006461,GO:0008150,GO:0009987,GO:0015232,GO:0016020,GO:0016021,GO:0016043,GO:0017004,GO:0019866,GO:0020037,GO:0022607,GO:0031090,GO:0031224,GO:0031966,GO:0034622,GO:0043623,GO:0043933,GO:0044422,GO:0044424,GO:0044425,GO:0044429,GO:0044444,GO:0044446,GO:0044464,GO:0046906,GO:0051184,GO:0065003,GO:0071822,GO:0071840,GO:0097159,GO:1901363
1	29213.c0.g2.i2	301.64	33.75	19.45	18.61	-2.3579	0.00993532	-1.27764	0.532586	0.122955	1	RL172_ARATH	97.727	8.58e-25	60S ribosomal protein L17-2	XP_009105285.1	97.727	3.29e-23	AT1G27400.1	97.727	1.24e-24	Ribosomal protein L22p/L17e family protein
1	29216.c0.g1.i3	16.83	0	0.12	0	-8.03613	9.89e-05	1.72528	1	-1.77854	1	DF158_ARATH	68.831	6.38e-30	Putative defensin-like protein 158	EFH55200.1	74.026	1.55e-30	AT4G29273.1	68.831	8.76e-30	low-molecular-weight cysteine-rich 23	PF02874.22					GO:0000166,GO:0003674,GO:0003824,GO:0004672,GO:0004674,GO:0004675,GO:0004871,GO:0004872,GO:0004888,GO:0005488,GO:0005515,GO:0005524,GO:0005575,GO:0005773,GO:0005886,GO:0005911,GO:0006464,GO:0006468,GO:0006793,GO:0006796,GO:0006807,GO:0008037,GO:0008150,GO:0008152,GO:0009506,GO:0009987,GO:0016020,GO:0016021,GO:0016301,GO:0016310,GO:0016740,GO:0016772,GO:0016773,GO:0017076,GO:0019199,GO:0019538,GO:…
1	29222.c0.g1.i2	75.51	4.75	1.76	0.52	-2.88487	0.0414195	-2.12713	0.142263	-1.5429	1					AAF79423.1	80.137	1.16e-75	AT1G19380.1	80.137	9.62e-78	sugar putative (DUF1195)
1	29230.c0.g1.i1	21.65	8.31	2.79	1.87	-0.508071	1	-2.06405	0.0239977	-0.305182	1	UTR3_ARATH	97.101	3.68e-146	UDP-galactose/UDP-glucose transporter 3 {ECO:0000303|PubMed:12042319}	ESQ35375.1	97.101	4.42e-144	AT1G14360.1	97.101	5.09e-146	UDP-galactose transporter 3
1	29232.c0.g1.i1	19.8	3.1	0.29	1	-1.82145	0.216544	-3.72471	0.0330436	1.8592	1	PNSB5_ARATH	87.736	3.15e-138	Photosynthetic NDH subunit of subcomplex B 5, chloroplastic {ECO:0000303|PubMed:21785130}	XP_010441991.1	91.905	7.3e-142	AT5G43750.1	87.793	3.17e-138	NAD(P)H dehydrogenase 18
1	29237.c0.g1.i1	29.84	3.04	5.67	7.89	-2.36135	0.00842611	0.342322	1	0.743391	1	U72D1_ARATH	72.124	4.15e-120	UDP-glycosyltransferase 72D1	EFH60400.1	79.111	8.16e-129	AT2G18560.1	76.889	2.66e-128	UDP-Glycosyltransferase superfamily protein				COG0107	ath:AT4G26900`KO:K01663
1	29237.c0.g2.i1	117.28	25.88	1.21	3.31	-1.37104	0.189412	-4.93142	8.33e-11	1.64535	1	U72D1_ARATH	77.491	6.79e-157	UDP-glycosyltransferase 72D1	EFH60400.1	81.55	1.03e-158	AT2G18560.1	80.074	1e-159	UDP-Glycosyltransferase superfamily protein
1	29255.c0.g1.i1	28.37	15.6	0.39	0.16	0.0502354	1	-5.69969	9.1e-06	-0.927563	1	SAU32_ARATH	57.143	3.9e-13	Auxin-responsive protein SAUR32 {ECO:0000305}	EFH40511.1	82.906	1.52e-29	AT5G53590.1	75.424	3.35e-30	SAUR-like auxin-responsive protein family			ExpAA=19.04^PredHel=1^Topology=i76-98o	ENOG410Z7Z7	ath:AT1G63400	GO:0000271,GO:0003674,GO:0003824,GO:0004373,GO:0005575,GO:0005975,GO:0005976,GO:0005982,GO:0006073,GO:0008150,GO:0008152,GO:0008194,GO:0009011,GO:0009058,GO:0009059,GO:0009250,GO:0009501,GO:0009507,GO:0009532,GO:0009536,GO:0009570,GO:0009987,GO:0010021,GO:0016051,GO:0016740,GO:0016757,GO:0016758,GO:0019252,GO:0033201,GO:0033692,GO:0034637,GO:0034645,GO:0035251,GO:0043170,GO:0043226,GO:0043227,GO:…
1	29267.c1.g2.i1	16.83	2.74	3.36	1.73	-1.73075	0.0484742	-0.197637	1	-0.680332	1
1	29271.c0.g1.i1	13.69	0.4	0.16	0	-4.06255	0.00036585	-1.75239	1	-2.54956	1	GLO1_ARATH	87.77	4.73e-85	(S)-2-hydroxy-acid oxidase GLO1	EOA33413.1	95.804	8.01e-91	AT3G14420.4	87.77	4.71e-85	Aldolase-type TIM barrel family protein	PF02365.14
1	29278.c0.g1.i2	8.27	0.83	0	0	-2.55981	0.0452148	-5.7689	0.0294488	0	1	YLS3_ARATH	78.641	2.69e-107	Protein YLS3	OAP09879.1	80.583	1.56e-108	AT2G44300.1	82.439	5.5e-109	Bifunctional inhibitor/lipid-transfer protein/seed storage 2S albumin superfamily protein				COG4677	ath:AT5G04970`KO:K01051
1	29285.c0.g1.i3	16.04	2.86	0.72	2.23	-1.64211	0.119904	-2.46735	0.011716	1.83857	1					EOA38534.1	81.095	5.09e-98	AT1G22250.1	73.267	2.12e-94	hypothetical protein	PF13516.5
1	29288.c0.g5.i3	603.47	100.52	82.6	73.58	-1.72925	0.0270351	-0.825687	0.654223	0.0840432	1	RL142_ARATH	96.825	2.13e-83	60S ribosomal protein L14-2	CDY14284.1	98.485	3.05e-87	AT4G27090.1	96.825	2.94e-83	Ribosomal protein L14
1	29293.c0.g1.i1	7.44	0.35	1.75	0.87	-3.5041	6.3e-05	1.75329	0.255426	-0.739242	1
1	29297.c0.g1.i1	542.22	0.55	0.49	0	-8.93034	3.36e-18	-0.656483	1	-3.96208	1					XP_020876978.1	79.874	3.54e-89	AT4G12870.1	78.481	6.52e-89	Gamma interferon responsive lysosomal thiol (GILT) reductase family protein						GO:0003674,GO:0003824,GO:0004553,GO:0004567,GO:0005575,GO:0005773,GO:0005975,GO:0008150,GO:0008152,GO:0015923,GO:0016787,GO:0016798,GO:0033947,GO:0043226,GO:0043227,GO:0043229,GO:0043231,GO:0044238,GO:0044424,GO:0044444,GO:0044464,GO:0071704
1	29302.c0.g1.i1	72.91	1.56	0	0	-4.52416	4.15e-05	-3.40237	1	0	1	PDCB3_ARATH	86.792	1.52e-28	PLASMODESMATA CALLOSE-BINDING PROTEIN 3	XP_013604134.1	92.453	3.91e-29	AT1G18650.1	86.792	2.08e-28	plasmodesmata callose-binding protein 3
1	29302.c1.g2.i4	50.21	0.29	0.05	0.06	-6.52887	3.32e-11	-2.47738	1	0.191889	1	PDCB3_ARATH	86.538	2.82e-23	PLASMODESMATA CALLOSE-BINDING PROTEIN 3	XP_019098769.1	98.039	2.68e-26	AT1G18650.2	86.538	5.79e-24	plasmodesmata callose-binding protein 3	PF14111.5		ExpAA=33.49^PredHel=1^Topology=i55-77o			GO:0000166,GO:0000325,GO:0003674,GO:0003824,GO:0005215,GO:0005488,GO:0005515,GO:0005516,GO:0005524,GO:0005575,GO:0005773,GO:0005774,GO:0006810,GO:0008150,GO:0008559,GO:0015238,GO:0015399,GO:0015405,GO:0016020,GO:0016021,GO:0016462,GO:0016787,GO:0016817,GO:0016818,GO:0016820,GO:0016887,GO:0017076,GO:0017111,GO:0022804,GO:0022857,GO:0022891,GO:0022892,GO:0030554,GO:0031090,GO:0031224,GO:0032553,GO:…
1	29305.c0.g1.i2	54.6	5.21	0.33	0.24	-2.65247	0.00706276	-4.40251	2.25e-05	-0.18308	1	PME12_ARATH	86.226	0	Probable pectinesterase/pectinesterase inhibitor 12	XP_010472673.1	88.783	0	AT2G26440.1	86.252	0	Plant invertase/pectin methylesterase inhibitor superfamily				COG5126	ath:AT3G07490`KO:K13448	GO:0003674,GO:0003824,GO:0005575,GO:0005789,GO:0012506,GO:0016020,GO:0016021,GO:0016409,GO:0016417,GO:0016740,GO:0016746,GO:0016747,GO:0019706,GO:0019707,GO:0030659,GO:0031090,GO:0031224,GO:0044422,GO:0044424,GO:0044425,GO:0044432,GO:0044433,GO:0044444,GO:0044446,GO:0044464
1	29306.c0.g1.i1	63.57	9.85	0.1	0.14	-1.7702	0.301868	-6.80635	1.03e-06	0.764159	1	CSPLF_ARALL	97.122	9.69e-49	CASP-like protein 1C1	ESQ38034.1	95.683	1.27e-46	AT4G03540.1	96.429	2.31e-48	Uncharacterized protein family (UPF0497)						GO:0003674,GO:0005488,GO:0005515,GO:0005575,GO:0005634,GO:0005737,GO:0006508,GO:0006511,GO:0006807,GO:0008150,GO:0008152,GO:0009056,GO:0009057,GO:0009987,GO:0019538,GO:0019941,GO:0043170,GO:0043226,GO:0043227,GO:0043229,GO:0043231,GO:0043632,GO:0044237,GO:0044238,GO:0044248,GO:0044260,GO:0044265,GO:0044424,GO:0044464,GO:0051603,GO:0071704,GO:1901564,GO:1901575
1	29309.c0.g1.i2	28.76	2.56	2.53	2.87	-2.56169	0.00248037	-0.601209	1	0.435246	1	BH115_ARATH	88.276	1.86e-89	Transcription factor bHLH115	XP_013608909.1	88.356	2.98e-87	AT1G51070.1	88.356	2.4e-90	basic helix-loop-helix (bHLH) DNA-binding superfamily protein	PF00127.19
1	29320.c0.g1.i2	25.22	1.08	0.04	0.07	-3.75315	0.000126963	-4.76769	0.0158279	0.74157	1					EOA12423.1	87.907	2.57e-118	AT1G01225.1	86.087	1.05e-115	NC domain-containing protein-like protein
1	29324.c0.g1.i1	109.99	7.76	0.25	0.41	-2.9136	0.00198337	-5.23519	1.01e-05	0.838206	1	MARD1_ARATH	33.766	4.42e-23	Protein MARD1 {ECO:0000303|PubMed:15159630}	XP_002885510.2	79.851	8.31e-127	AT3G22550.1	80.597	9.24e-128	NAD(P)H-quinone oxidoreductase subunit putative (DUF581)						GO:0003002,GO:0003006,GO:0003674,GO:0005488,GO:0005515,GO:0005575,GO:0005634,GO:0005829,GO:0006139,GO:0006351,GO:0006355,GO:0006725,GO:0006807,GO:0007165,GO:0007389,GO:0008150,GO:0008152,GO:0009058,GO:0009059,GO:0009719,GO:0009725,GO:0009733,GO:0009755,GO:0009867,GO:0009889,GO:0009890,GO:0009892,GO:0009987,GO:0010014,GO:0010033,GO:0010051,GO:0010072,GO:0010468,GO:0010556,GO:0010558,GO:0010605,GO:…
1	29329.c2.g1.i7	81.29	13.8	14.26	11.91	-1.71896	0.0184757	-0.461132	1	-0.00286214	1	SPCS2_ARATH	96.739	1.3e-124	Probable signal peptidase complex subunit 2	P58684.1	96.739	2.16e-122	AT2G39960.1	96.739	1.79e-124	Microsomal signal peptidase 25 kDa subunit (SPC25)
1	29337.c0.g1.i3	239.06	44.31	6.19	12.09	-1.64477	0.153966	-3.24744	0.00372288	1.14843	1
1	29337.c0.g2.i1	659.02	144.39	36.22	52.38	-1.36626	0.238067	-2.39069	0.0297474	0.649007	1					EFH55782.1	82.609	1.88e-18	AT2G34870.1	80.435	4.21e-20	hydroxyproline-rich glycoprotein family protein
1	29375.c0.g1.i5	38.1	2.13	3.79	4.14	-3.25964	2.16e-06	0.291575	1	0.401476	1	Y3972_ARATH	93.75	2.15e-81	Uncharacterized protein At3g49720	XP_010503636.1	93.75	3.21e-79	AT3G49720.3	93.75	2.96e-81	transmembrane protein
1	29378.c0.g1.i2	8.88	0.66	0.25	0.34	-2.83883	0.00607866	-1.82924	0.592476	0.686813	1	FAS2_ARATH	85.526	0	Chromatin assembly factor 1 subunit FAS2	XP_010484248.1	87.895	0	AT5G64630.2	85.564	0	Transducin/WD40 repeat-like superfamily protein
1	29382.c0.g1.i1	103.59	14.66	17.56	16.72	-2.01333	0.022504	-0.250017	1	0.178047	1	RS29_ARATH	98.148	1.64e-31	40S ribosomal protein S29	XP_023635605.1	100	5.15e-31	AT4G33865.1	98.148	2.24e-31	Ribosomal protein S14p/S29e family protein	PF08263.11
1	29384.c0.g1.i2	76.97	2.53	4.42	3.51	-3.79807	0.000237704	0.0413919	1	-0.030611	1	NRT31_ARATH	84.286	2.24e-116	High-affinity nitrate transporter 3.1	XP_010441706.1	90.476	7.77e-125	AT5G50200.3	84.36	2.26e-116	nitrate transmembrane transporter
1	29393.c0.g1.i8	13.61	0.82	0.93	1.44	-3.05774	0.000460162	-0.345447	1	0.824071	1	BB_ARATH	91.549	1.46e-147	E3 ubiquitin ligase BIG BROTHER	Q8L649.1	91.549	2.43e-145	AT3G63530.2	91.549	2.02e-147	RING/U-box superfamily protein
1	29396.c1.g1.i1	30.19	5.23	1.03	1.72	-1.67259	0.103315	-2.83408	0.0128108	0.96047	1	GDT14_ARATH	93.103	1.5e-91	GDT1-like protein 4	XP_010460348.1	95.402	2.71e-93	AT1G25520.1	93.103	2.07e-91	Uncharacterized protein family (UPF0016)
1	29405.c0.g1.i6	329.38	2.15	0.42	0.65	-6.38109	6.27e-21	-2.80042	0.00989088	0.810788	1	PSBO2_ARATH	93.333	3.68e-178	Oxygen-evolving enhancer protein 1-2, chloroplastic	EFH54033.1	93.889	3.82e-177	AT3G50820.1	93.333	5.09e-178	photosystem II subunit O-2
1	29405.c0.g2.i2	286.69	1.13	0.38	0.09	-7.08782	1.3e-19	-2.0461	0.35102	-1.72167	1	PSBO2_ARATH	95.556	5.74e-143	Oxygen-evolving enhancer protein 1-2, chloroplastic	EFH54033.1	96.111	2.56e-141	AT3G50820.1	95.556	7.9e-143	photosystem II subunit O-2
1	29410.c0.g2.i1	46.26	11.9	0.05	0.16	-1.1088	0.812112	-7.67411	4.82e-07	1.54117	1					AAK17146.1	85.106	1.96e-116	AT2G32030.1	85.185	1.18e-118	Acyl-CoA N-acyltransferases (NAT) superfamily protein						GO:0003674,GO:0003824,GO:0006082,GO:0006725,GO:0006807,GO:0008150,GO:0008152,GO:0009683,GO:0009850,GO:0009987,GO:0010817,GO:0016787,GO:0016788,GO:0019752,GO:0032502,GO:0032787,GO:0033473,GO:0034641,GO:0034754,GO:0042430,GO:0042445,GO:0043436,GO:0044237,GO:0044281,GO:0044699,GO:0044710,GO:0044763,GO:0044767,GO:0046483,GO:0048367,GO:0048731,GO:0048856,GO:0052689,GO:0065007,GO:0065008,GO:0071704,GO:…
1	29423.c0.g1.i3	7.21	0.19	0.15	0.15	-4.20069	5.87e-05	-0.949355	1	0.262172	1	NAKR2_ARATH	69.231	2.93e-25	Protein SODIUM POTASSIUM ROOT DEFECTIVE 2 {ECO:0000303|PubMed:21193571}	EFH55438.1	75.543	9.57e-49	AT2G28660.1	75.248	1.48e-43	Chloroplast-targeted copper chaperone protein	PF14111.5			COG0515	ath:AT1G09970
1	29424.c0.g1.i7	11.17	0	0	0	-7.79371	9.87e-05	5.13e-15	1	0	1	MY118_ARATH	49.057	1.1e-42	Transcription factor MYB118 {ECO:0000303|PubMed:11597504}	XP_010425555.1	43.169	7.33e-41	AT3G27785.1	49.057	1.49e-42	myb domain protein 118		sigP:1^18^0.833^YES				GO:0003674,GO:0003676,GO:0003723,GO:0005488,GO:0005575,GO:0005737,GO:0008150,GO:0009719,GO:0009725,GO:0009735,GO:0010033,GO:0016020,GO:0042221,GO:0044424,GO:0044464,GO:0050896,GO:0097159,GO:1901363
1	29426.c1.g1.i2	44.71	5.51	4.76	5.05	-2.17892	0.00293237	-0.711709	1	0.342423	1	RS22_ARATH	85.417	3.39e-50	40S ribosomal protein S2-2	ESQ35851.1	88.421	2.42e-48	AT1G59359.1	85.567	7.08e-50	Ribosomal protein S5 family protein	PF00160.20
1	29426.c1.g2.i3	145.79	17.55	9.13	11.26	-2.17202	0.0106283	-1.52929	0.0707436	0.549303	1	RS22_ARATH	85.263	2.97e-54	40S ribosomal protein S2-2	XP_010508673.1	89.474	8.37e-55	AT1G59359.1	84.536	2.88e-54	Ribosomal protein S5 family protein			ExpAA=130.50^PredHel=6^Topology=i13-35o50-68i75-97o107-129i142-161o171-193i
1	29444.c0.g1.i2	37.7	3.09	0.33	0.34	-2.71063	8.02e-05	-3.62027	0.000257668	0.284923	1	FATA2_ARATH	79.147	8.44e-112	Oleoyl-acyl carrier protein thioesterase 2, chloroplastic	EOA18815.1	79.621	3.42e-111	AT4G13050.1	79.147	1.16e-111	Acyl-ACP thioesterase
1	29454.c0.g1.i3	442.65	130.88	41.36	42.66	-0.832783	0.586311	-2.20708	0.000166454	0.288832	1					XP_020874043.1	93.75	5.39e-35	AT4G16765.5	93.878	7.57e-37	2-oxoglutarate (2OG) and Fe(II)-dependent oxygenase superfamily protein
1	29469.c0.g1.i3	61.99	7.6	3.5	2.87	-2.13645	0.00169884	-1.65194	0.0399634	-0.0211159	1					CDY23272.1	99.01	2.39e-62	AT4G30996.1	97.059	3.46e-63	ubiquitin-associated protein (DUF1068)
1	29476.c1.g1.i1	13.09	0	0.25	0.16	-9.3512	1.01e-10	3.89127	0.911844	-0.26282	1					XP_010438338.1	90.909	1.17e-123	AT4G29110.1	85.075	7.32e-115	cotton fiber protein			ExpAA=75.01^PredHel=3^Topology=o188-210i222-244o254-276i	ENOG41128XY	ath:AT5G66450
1	29480.c2.g2.i4	110.14	5.94	0	0.26	-3.43778	2.64e-05	-8.59999	9.57e-08	3.96815	1	PLA2A_ARATH	87.838	1.11e-93	Phospholipase A2-alpha {ECO:0000303|PubMed:16140037}	ADM67340.1	93.243	4.98e-96	AT2G06925.1	87.919	4.08e-94	Phospholipase A2 family protein				ENOG410YIPU	ath:AT2G30590
1	29482.c3.g1.i1	593.05	2.06	2.5	2.92	-7.31243	4.25e-19	-0.232339	1	0.446287	1	PSBP1_ARATH	96.528	4.35e-100	Oxygen-evolving enhancer protein 2-1, chloroplastic	XP_020868610.1	97.222	1.41e-98	AT1G06680.2	96.552	2.72e-100	photosystem II subunit P-1			ExpAA=129.88^PredHel=5^Topology=i65-87o169-191i203-225o235-257i278-300o	ENOG410XQ8V	ath:AT3G14570`KO:K11000	GO:0003674,GO:0003824,GO:0005575,GO:0005737,GO:0005975,GO:0005996,GO:0006004,GO:0006464,GO:0006486,GO:0006807,GO:0008150,GO:0008152,GO:0009507,GO:0009536,GO:0009987,GO:0016021,GO:0016740,GO:0016757,GO:0019318,GO:0019538,GO:0031224,GO:0036211,GO:0043170,GO:0043226,GO:0043227,GO:0043229,GO:0043231,GO:0043412,GO:0043413,GO:0044237,GO:0044238,GO:0044260,GO:0044267,GO:0044281,GO:0044424,GO:0044425,GO:…
1	29482.c3.g4.i1	1101.96	4.58	2.5	0.8	-6.99688	3.21e-19	-1.37079	1	-1.38336	1	PSBP1_ARATH	95	4.99e-67	Oxygen-evolving enhancer protein 2-1, chloroplastic	XP_010486454.1	98	3.47e-67	AT1G06680.1	95	6.87e-67	photosystem II subunit P-1						GO:0000786,GO:0003674,GO:0003676,GO:0003677,GO:0005488,GO:0005575,GO:0005730,GO:0005739,GO:0006325,GO:0006334,GO:0008150,GO:0009987,GO:0016043,GO:0022607,GO:0032991,GO:0032993,GO:0034622,GO:0034728,GO:0043226,GO:0043227,GO:0043228,GO:0043229,GO:0043231,GO:0043232,GO:0043933,GO:0044422,GO:0044424,GO:0044427,GO:0044428,GO:0044444,GO:0044446,GO:0044464,GO:0044815,GO:0065003,GO:0065004,GO:0071824,GO:…
1	29486.c0.g1.i1	213.95	11.03	0	0.22	-3.45459	4.41e-06	-7.51465	2.79e-06	1.97651	1					AAM61737.1	91.667	8.16e-16	AT5G01075.1	91.667	6.7e-18	Glycosyl hydrolase family 35 protein						GO:0001071,GO:0003006,GO:0003674,GO:0003676,GO:0003677,GO:0003700,GO:0005488,GO:0005515,GO:0005575,GO:0005634,GO:0006139,GO:0006351,GO:0006355,GO:0006725,GO:0006807,GO:0008150,GO:0008152,GO:0009058,GO:0009059,GO:0009314,GO:0009416,GO:0009628,GO:0009648,GO:0009791,GO:0009889,GO:0009908,GO:0009909,GO:0009987,GO:0010468,GO:0010556,GO:0016070,GO:0018130,GO:0019219,GO:0019222,GO:0019438,GO:0022414,GO:…
1	29515.c1.g1.i2	286.69	20.21	1.24	0.92	-2.99509	3.37e-06	-4.55075	1.1e-08	-0.181392	1	LACS9_ARATH	94.553	2.28e-173	Long chain acyl-CoA synthetase 9, chloroplastic	AAO22689.1	94.553	7.91e-175	AT1G77590.2	94.574	1.1e-175	long chain acyl-CoA synthetase 9				COG5147	ath:AT5G15310`KO:K09422	GO:0000166,GO:0002237,GO:0002376,GO:0003674,GO:0003824,GO:0005488,GO:0005515,GO:0005524,GO:0005575,GO:0005739,GO:0005740,GO:0005741,GO:0006950,GO:0006952,GO:0006955,GO:0007165,GO:0008150,GO:0008219,GO:0009314,GO:0009411,GO:0009416,GO:0009605,GO:0009607,GO:0009617,GO:0009626,GO:0009628,GO:0009863,GO:0009987,GO:0010033,GO:0012501,GO:0016020,GO:0016021,GO:0016462,GO:0016787,GO:0016817,GO:0016818,GO:…
1	29522.c0.g1.i1	14.26	2.54	0.61	1.27	-1.54771	0.136932	-2.49703	0.0423863	1.17703	1					EOA23024.1	81.967	1.38e-51	AT4G01575.1	75.2	4.09e-48	serine protease inhibitor Kazal-type family protein
1	29524.c6.g1.i3	8.41	1.49	0.07	0	-1.62884	0.31382	-4.70182	0.00257814	-2.54878	1	MYB53_ARATH	77.612	2.78e-32	Transcription factor MYB53 {ECO:0000303|PubMed:9839469}	EFH58521.1	78.75	7.05e-96	AT3G02940.2	80.083	1.08e-96	myb domain protein 107
1	29524.c6.g3.i1	29.92	3.43	11.64	19.82	-2.14309	0.017233	1.08047	0.84042	1.15909	1	YCF68_ORYSJ	58.696	7.1e-36	Uncharacterized protein ycf68	AKR06823.1	91.15	2.26e-67
1	29525.c0.g3.i1	5.69	0.09	0.85	3.34	-4.80667	0.0456933	2.25801	1	2.31465	1
1	29527.c0.g1.i3	65.88	1.28	0.08	0.12	-4.88856	6.23e-06	-4.11987	0.132052	0.766072	1					ANM58528.1	76.613	5.13e-129	AT1G44760.2	76.707	3.1e-131	Adenine nucleotide alpha hydrolases-like superfamily protein			ExpAA=22.01^PredHel=1^Topology=i12-34o	ENOG410Y0W7	ath:AT3G14980
1	29528.c1.g1.i1	183.12	32.37	33.02	39.09	-1.66969	0.039319	-0.485665	1	0.508571	1	RS42_ARATH	97.006	3.51e-98	40S ribosomal protein S4-2	BAH57121.1	97.006	4.38e-97	AT5G07090.3	97.024	6.46e-99	Ribosomal protein S4 (RPS4A) family protein
1	29537.c0.g1.i1	69.38	0.9	3.94	3.32	-5.39543	6e-13	1.58799	0.17368	-0.00397021	1	AB19B_ARATH	97.231	0	ABC transporter B family member 19	EOA23408.1	97.846	0	AT3G28860.1	97.239	0	ATP binding cassette subfamily B19	PF00025.20
1	29537.c0.g2.i1	9.17	0.4	0.94	0.32	-3.70376	0.00118255	0.715974	1	-1.25208	1	AB19B_ARATH	97.719	2.45e-177	ABC transporter B family member 19	BAF01897.1	97.719	0	AT3G28860.1	97.719	3.34e-177	ATP binding cassette subfamily B19
1	29537.c1.g1.i1	18.25	1.39	1.31	0.79	-2.78324	0.000564716	-0.619083	1	-0.426876	1	AB1B_ARATH	99.231	1.12e-81	ABC transporter B family member 1	BAF02132.1	99.231	3.34e-81	AT2G36910.1	99.237	1.12e-81	ATP binding cassette subfamily B1
1	29542.c0.g1.i5	46.26	16.24	4.48	5.27	-0.662772	1	-2.35477	0.0129178	0.460514	1	DNJ19_ARATH	91.549	8.4e-81	DnaJ protein ERDJ3B	EOA26151.1	92.958	3.04e-80	AT3G62600.1	91.549	1.15e-80	DNAJ heat shock family protein
1	29545.c0.g2.i1	86.92	8.35	12.56	9.58	-2.5235	0.000604189	0.0604608	1	-0.1503	1	RS51_ARATH	99.324	1.75e-104	40S ribosomal protein S5-1	XP_020885181.1	99.324	2.61e-102	AT2G37270.2	99.329	1.76e-104	ribosomal protein 5B
1	29546.c1.g2.i1	102.73	2.99	2.98	1.69	-4.2331	4.45e-09	-0.566821	1	-0.534636	1	PETM_SPIOL	80	1.46e-07	Cytochrome b6-f complex subunit 7	EOA28135.1	85.981	6.73e-50	AT2G26500.2	85.981	5.73e-52	cytochrome b6f complex subunit (petM)
1	29546.c2.g1.i2	95.88	16.23	4.07	3.69	-1.74707	0.0521824	-2.47572	0.00488172	0.0695963	1	SAR1B_ARATH	97.409	2.64e-111	GTP-binding protein SAR1B	EOA34021.1	97.409	1.75e-109	AT1G56330.1	97.423	7.85e-112	secretion-associated RAS 1B
1	29548.c1.g1.i5	28.51	4.72	6.56	8.07	-1.7362	0.036016	-0.0411571	1	0.544715	1					XP_010474703.1	95.833	1.75e-23	AT1G01170.2	93.878	3.27e-25	ozone-responsive stress-like protein (DUF1138)
1	29564.c0.g4.i1	48.46	3.99	1.78	0.28	-2.75669	0.00898887	-1.63196	0.853311	-2.18586	1	C77A4_ARATH	89.062	9.16e-36	Cytochrome P450 77A4	XP_010423551.1	90.625	2.9e-34	AT3G10570.1	89.231	8.8e-36	cytochrome P450 family 77 subfamily A polypeptide 6
1	29565.c0.g1.i7	4.27	0	0	0	-6.86381	0.00523992	5.13e-15	1	0	1																	GO:0005575,GO:0005730,GO:0006139,GO:0006364,GO:0006396,GO:0006725,GO:0006807,GO:0008150,GO:0008152,GO:0009561,GO:0009987,GO:0016070,GO:0016072,GO:0022613,GO:0030529,GO:0030684,GO:0032040,GO:0032501,GO:0032991,GO:0034470,GO:0034641,GO:0034660,GO:0042274,GO:0043170,GO:0043226,GO:0043228,GO:0043229,GO:0043232,GO:0044085,GO:0044237,GO:0044238,GO:0044260,GO:0044422,GO:0044424,GO:0044428,GO:0044446,GO:…
1	29565.c0.g2.i1	383.09	0.45	0	0.13	-8.50037	7.22e-08	-3.76303	0.980776	1.97678	1					AAM61289.1	59.615	1.67e-11	AT3G49300.1	59.615	1.38e-13	proline-rich family protein						GO:0003674,GO:0003676,GO:0003824,GO:0004518,GO:0004519,GO:0004521,GO:0004523,GO:0004540,GO:0005488,GO:0016787,GO:0016788,GO:0016891,GO:0016893,GO:0043167,GO:0043169,GO:0046872,GO:0097159,GO:1901363
1	29569.c0.g1.i3	336.74	58.61	12.2	11.2	-1.57461	0.0339709	-2.81968	2.74e-06	0.120925	1	CTL1_ARATH	96.196	3.42e-111	Chitinase-like protein 1	EOA38271.1	96.739	3.69e-109	AT1G05850.2	96.196	4.72e-111	Chitinase family protein
1	29570.c1.g1.i2	51.89	8.86	32.22	26.17	-1.63979	0.0405821	1.26933	0.143518	-0.0247445	1	TCPG_ARATH	89.259	6.64e-160	T-complex protein 1 subunit gamma {ECO:0000303|PubMed:11599560}	EOA20306.1	89.63	2.58e-159	AT5G26360.1	89.299	6.67e-160	TCP-1/cpn60 chaperonin family protein				ENOG4111FR6	ath:AT4G26850`KO:K14190
1	29572.c0.g1.i5	5.82	4.31	0.37	0.17	0.611945	1	-4.02402	8.15e-06	-0.939286	1	GT14B_ARATH	63.514	8.45e-133	Beta-glucuronosyltransferase GlcAT14B {ECO:0000305}	EOA16701.1	91.971	0	AT4G27480.3	91.273	0	Core-2/I-branching beta-16-N-acetylglucosaminyltransferase family protein
1	29574.c0.g1.i1	37	3.15	0.66	0.7	-2.69374	0.0272822	-2.43404	1	0.248725	1	PHL6_ARATH	84.314	4.42e-43	Myb family transcription factor PHL6 {ECO:0000305}	CDY43380.1	90.196	6.84e-47	AT3G13040.3	84.314	5.99e-43	myb-like HTH transcriptional regulator family protein
1	29574.c1.g2.i1	18.63	0.6	0.12	0.14	-3.96077	3.92e-05	-2.33771	1	0.201271	1	PHL6_ARATH	79.545	7.74e-42	Myb family transcription factor PHL6 {ECO:0000305}	EFH61197.1	81.481	1.42e-40	AT3G13040.3	79.699	4.25e-42	myb-like HTH transcriptional regulator family protein	PF04770.11
1	29574.c1.g3.i1	23.25	0.24	0	0.3	-5.34989	0.000188175	-2.02721	1	1.97006	1	PHL6_ARATH	73.684	3.07e-10	Myb family transcription factor PHL6 {ECO:0000305}	EOA30570.1	86.842	5.45e-11	AT3G13040.3	74.359	3.09e-10	myb-like HTH transcriptional regulator family protein						GO:0000139,GO:0003674,GO:0003824,GO:0005575,GO:0006464,GO:0006486,GO:0006807,GO:0008150,GO:0008152,GO:0009987,GO:0016020,GO:0016021,GO:0016043,GO:0016740,GO:0016757,GO:0019538,GO:0031090,GO:0031224,GO:0036211,GO:0043170,GO:0043412,GO:0043413,GO:0044237,GO:0044238,GO:0044260,GO:0044267,GO:0044422,GO:0044424,GO:0044425,GO:0044431,GO:0044444,GO:0044446,GO:0044464,GO:0044699,GO:0044710,GO:0044763,GO:…
1	29585.c0.g1.i1	18.14	1.22	3.18	3.06	-2.95181	6.92e-06	0.800431	0.921862	0.227518	1	SR54C_ARATH	94.336	0	Signal recognition particle 54 kDa protein, chloroplastic	EOA22946.1	95.552	0	AT5G03940.1	94.336	0	chloroplast signal recognition particle 54 kDa subunit
1	29589.c0.g1.i1	18.66	8.32	1.77	1.26	-0.260348	1	-2.80684	5.61e-05	-0.201597	1	LTPG2_ARATH	76.744	1.2e-75	Non-specific lipid transfer protein GPI-anchored 2	AAM66942.1	76.744	1.56e-73	AT3G43720.1	76.744	1.66e-75	Bifunctional inhibitor/lipid-transfer protein/seed storage 2S albumin superfamily protein	PF13325.5
1	29590.c0.g1.i1	17.14	0.99	0.78	1.7	-3.14644	0.0002116	-0.863528	1	1.35072	1					EFH52652.1	87.273	1.52e-25	AT3G57062.2	91.837	2.06e-24	transmembrane protein
1	29599.c0.g1.i1	15.88	0.29	0.05	0	-4.76509	3.09e-06	-2.7862	0.556975	-2.55254	1	JGB_ARATH	67.16	2.25e-156	Protein JINGUBANG {ECO:0000303|PubMed:27468890}	XP_020866594.1	92.023	0	AT1G47610.1	91.761	0	Transducin/WD40 repeat-like superfamily protein						GO:0003674,GO:0003676,GO:0003677,GO:0005488,GO:0005575,GO:0005654,GO:0006139,GO:0006351,GO:0006355,GO:0006725,GO:0006807,GO:0006950,GO:0008150,GO:0008152,GO:0009058,GO:0009059,GO:0009266,GO:0009409,GO:0009628,GO:0009889,GO:0009909,GO:0009987,GO:0010048,GO:0010468,GO:0010556,GO:0016070,GO:0018130,GO:0019219,GO:0019222,GO:0019438,GO:0031323,GO:0031326,GO:0032774,GO:0034641,GO:0034645,GO:0034654,GO:…
1	29615.c0.g1.i1	27.04	14.78	0.03	0.03	-0.0920944	1	-8.74259	5.58e-09	0.230941	1					AAD24609.1	89.939	0	AT2G16760.1	89.97	0	Calcium-dependent phosphotriesterase superfamily protein				ENOG41113M5	ath:AT4G02000	GO:0005575,GO:0005789,GO:0016020,GO:0016021,GO:0031224,GO:0044422,GO:0044424,GO:0044425,GO:0044432,GO:0044444,GO:0044446,GO:0044464
1	29617.c2.g1.i3	27.47	1.55	1.69	1.29	-3.28096	7.1e-05	-0.379922	1	-0.174676	1					AAC69940.1	86.31	9.78e-93	AT2G32380.1	86.391	5.89e-95	Transmembrane protein 97 Putative
1	29618.c0.g1.i1	8.77	0.82	3.85	1.81	-2.39039	0.0281418	1.60091	0.48584	-0.795292	1	ARFI_ARATH	84.343	2.82e-116	Auxin response factor 9	ADB96363.1	83.938	1.57e-115	AT4G23980.1	84.343	3.86e-116	auxin response factor 9
1	29621.c0.g1.i1	176.11	59.99	0.28	1.28	-0.69447	0.986606	-8.18976	1.52e-20	2.35071	1	FATA1_ARATH	92.308	1.09e-41	Oleoyl-acyl carrier protein thioesterase 1, chloroplastic	EOA30882.1	94.805	8.64e-43	AT3G25110.1	92.308	1.49e-41	fatA acyl-ACP thioesterase				COG0707	ath:AT2G11810`KO:K03715	GO:0003674,GO:0003824,GO:0004721,GO:0004722,GO:0005488,GO:0016787,GO:0016788,GO:0016791,GO:0042578,GO:0043167,GO:0043169,GO:0046872
1	29634.c0.g1.i2	8.02	2.15	0.37	0.25	-0.887043	1	-2.91953	0.0465104	-0.16566	1	MPCP2_ARATH	89.13	0	Mitochondrial phosphate carrier protein 2, mitochondrial	Q9M2Z8.1	89.13	0	AT3G48850.1	89.16	0	phosphate transporter 3;2
1	29643.c0.g1.i2	74.29	3.27	0.4	0.13	-3.67739	0.000124885	-3.38563	0.0700679	-1.36916	1	GGP1_ARATH	92.4	4.02e-160	Gamma-glutamyl peptidase 1 {ECO:0000305}	Q9M0A7.1	92.4	6.71e-158	AT4G30530.1	92.43	3.08e-160	Class I glutamine amidotransferase-like superfamily protein
1	29645.c1.g1.i1	565.84	21.32	0.45	0	-3.9334	0.000211007	-5.54077	0.000364905	-1.77612	1	GASA7_ARATH	85.185	1e-25	Gibberellin-regulated protein 7	EOA31754.1	87.037	2.43e-25	AT2G14900.1	85.185	1.38e-25	Gibberellin-regulated family protein						GO:0003674,GO:0003824,GO:0004175,GO:0004298,GO:0005575,GO:0005634,GO:0005737,GO:0005839,GO:0006508,GO:0006807,GO:0008150,GO:0008152,GO:0008233,GO:0016787,GO:0019538,GO:0019774,GO:0032991,GO:0043170,GO:0043226,GO:0043227,GO:0043229,GO:0043231,GO:0043234,GO:0044238,GO:0044424,GO:0044464,GO:0051603,GO:0070003,GO:0070011,GO:0071704,GO:1901564
1	29648.c0.g1.i2	27.64	20.9	7.31	2.03	0.526967	1	-2.11989	0.0026805	-1.56208	1	AFP4_ARATH	69.876	6.53e-128	Ninja-family protein AFP4	Q9S7Z2.1	69.876	1.09e-125	AT3G02140.1	69.969	6.57e-128	AFP2 (ABI five-binding protein 2) family protein
1	29656.c0.g1.i5	10.34	1.41	0.99	0.32	-1.99852	0.0172033	-1.02075	1	-1.36871	1	LSM7_ARATH	96.939	2.13e-61	Sm-like protein LSM7 {ECO:0000305}	EFH51493.1	97.959	4.28e-60	AT2G03870.2	96.97	2.14e-61	Small nuclear ribonucleoprotein family protein	PF02178.18
1	29663.c0.g2.i1	9.18	0.31	0.98	0.78	-3.9115	7.14e-06	1.0695	1	-0.0411181	1	Y5162_ARATH	34.109	2.37e-30	Uncharacterized protein At5g41620	EOA30108.1	96.346	0	AT3G11590.2	94.02	1.33e-180	golgin family A protein
1	29668.c0.g1.i4	25.87	12.55	1.73	2.47	-0.187483	1	-3.37002	0.000128667	0.836223	1	VIT1_ARATH	93.023	3.2e-106	Vacuolar iron transporter 1	Q9ZUA5.1	93.023	4.2e-104	AT2G01770.1	93.077	3.47e-106	vacuolar iron transporter 1				COG0187	osa:4326261`KO:K02470
1	29670.c0.g2.i1	33.93	12.71	4.01	2.72	-0.610662	1	-2.15613	0.00890827	-0.290755	1	CESA6_ARATH	97.351	1.06e-83	Cellulose synthase A catalytic subunit 6 [UDP-forming]	ESQ31403.1	98.675	8.14e-83	AT5G64740.1	97.368	1.06e-83	cellulose synthase 6				ENOG410Y65V	ath:ArthMp029
1	29670.c0.g4.i2	18.01	6.27	2.5	2.14	-0.624401	1	-1.88944	0.0296665	0.0697967	1	CESA6_ARATH	97.5	0	Cellulose synthase A catalytic subunit 6 [UDP-forming]	EOA12641.1	98.929	0	AT5G64740.1	97.5	0	cellulose synthase 6
1	29670.c0.g6.i1	139.67	5.99	0.54	0.12	-3.65913	0.0023502	-3.79952	0.0362438	-1.71567	1	CESAA_ARATH	93.617	8.44e-156	Probable cellulose synthase A catalytic subunit 10 [UDP-forming]	XP_010472554.2	96.596	1.81e-160	AT2G25540.1	93.617	1.11e-155	cellulose synthase A catalytic subunit 3 UDP-forming-like protein
1	29672.c2.g1.i5	12.63	2.56	0.35	0.19	-1.47322	0.262021	-3.31455	0.0057058	-0.614408	1	NCRK_ARATH	92.281	0	Receptor-like serine/threonine-protein kinase NCRK	Q8VYY5.1	92.281	0	AT2G28250.6	92.281	0	Protein kinase superfamily protein
1	29689.c0.g1.i1	9.4	1.64	0.03	0.03	-1.58357	0.457657	-5.842	4.69e-05	0.230218	1	CCX1_ARATH	90.775	0	Cation/calcium exchanger 1	XP_010492752.1	92	0	AT5G17860.1	90.792	0	calcium exchanger 7						GO:0003674,GO:0003676,GO:0005488,GO:0097159,GO:1901363
1	29690.c0.g1.i5	1783.49	276.52	15.83	7.71	-1.80234	0.095492	-4.54305	1.42e-05	-0.854945	1	ERD14_ARATH	85.246	5.47e-16	Dehydrin ERD14	EOA35752.1	87.766	2.69e-18	AT1G76180.2	85.246	8.99e-16	Dehydrin family protein				COG0456	ath:AT1G03150`KO:K17972
1	29693.c0.g1.i1	72.31	39.74	18.51	19.97	0.0687824	1	-1.66067	0.00867399	0.36162	1	ZIP6_ARATH	90.828	0	Zinc transporter 6, chloroplastic	CAE30488.1	91.395	0	AT2G30080.1	90.855	0	ZIP metal ion transporter family
1	29697.c0.g4.i2	69.12	53.76	18.73	17.2	0.628973	1	-2.06789	0.000511469	0.129308	1	SOT12_ARATH	69.945	3.64e-86	Cytosolic sulfotransferase 12	EFH53155.1	78.142	5.71e-89	AT2G03760.1	69.945	5.02e-86	sulfotransferase 12
1	29697.c0.g5.i1	44.93	15.93	6.11	3.57	-0.532741	1	-1.92159	0.0279393	-0.500535	1	SOT12_ARATH	55.422	8.78e-43	Cytosolic sulfotransferase 12	AAC63113.1	56.97	1.63e-43	AT2G03760.1	55.422	1.2e-42	sulfotransferase 12	PF01476.19
1	29699.c0.g1.i4	27.82	14.08	3.32	3.16	-0.0871349	1	-2.51118	0.0147733	0.161887	1					EOA17250.1	90.833	6.93e-149	AT4G17900.1	92.982	8.06e-149	PLATZ transcription factor family protein
1	29700.c0.g1.i2	9.92	5.82	0.42	0.69	0.11558	1	-4.13323	0.000376289	0.796732	1					XP_023642554.1	79.528	4.91e-63	AT2G18100.3	77.953	4.55e-63	transmembrane/coiled-coil protein (DUF726)
1	29701.c0.g1.i1	33.09	3.13	0.03	0.03	-2.48582	0.00222939	-6.51404	3.47e-08	0.230918	1					EOA15637.1	83.523	2.24e-79	AT4G37240.1	83.721	1.07e-79	HTH-type transcriptional regulator	PF03168.12			ENOG410XQ1D	ath:AT3G63460`KO:K14005	GO:0001071,GO:0003674,GO:0003676,GO:0003677,GO:0003700,GO:0005488,GO:0005515,GO:0005575,GO:0005634,GO:0006082,GO:0006139,GO:0006351,GO:0006629,GO:0006720,GO:0006721,GO:0006725,GO:0006807,GO:0007275,GO:0008150,GO:0008152,GO:0008300,GO:0009056,GO:0009058,GO:0009059,GO:0009685,GO:0009889,GO:0009987,GO:0010371,GO:0010565,GO:0016042,GO:0016054,GO:0016070,GO:0016101,GO:0016103,GO:0016115,GO:0018130,GO:…
1	29705.c0.g2.i1	14.53	2	1.73	1.15	-1.89347	0.0387556	-0.810026	1	-0.379074	1	WRK17_ARATH	82.663	2.54e-166	Probable WRKY transcription factor 17	XP_020885201.1	81.231	7.12e-165	AT2G24570.1	82.716	2.56e-166	WRKY DNA-binding protein 17
1	29712.c0.g1.i2	84.23	9.61	0.11	0.13	-2.40859	0.0668557	-6.52165	1.27e-05	0.233876	1					XP_010444619.1	94.406	1.32e-67	AT5G67620.1	89.51	1.44e-65	DUF4228 domain protein				COG3240	ath:AT2G40250	GO:0003674,GO:0003824,GO:0004175,GO:0004222,GO:0005488,GO:0005575,GO:0005829,GO:0008233,GO:0008237,GO:0016787,GO:0043167,GO:0043169,GO:0044424,GO:0044444,GO:0044464,GO:0046872,GO:0070011
1	29724.c0.g1.i2	26.26	1.96	0.42	0.53	-2.91435	0.000149318	-2.65333	0.026424	0.577819	1	SPA_SOLLC	83.607	3.05e-44	Protein SPA, chloroplastic {ECO:0000303|PubMed:24372694}	EOA35847.1	90.722	3.98e-59	AT1G75690.1	73.016	2.5e-36	DnaJ/Hsp40 cysteine-rich domain superfamily protein
1	29725.c1.g1.i3	8.96	0.12	0	0.08	-5.21006	1.27e-07	-3.9886	0.999214	3.30456	1	BRXL4_ARATH	79.221	7.64e-168	Protein Brevis radix-like 4	EOA20662.1	80.049	6.7e-180	AT5G20540.1	79.275	9.78e-168	BREVIS RADIX-like 4						GO:0000062,GO:0003674,GO:0005488,GO:0005515,GO:0005575,GO:0005777,GO:0008289,GO:0042579,GO:0043167,GO:0043168,GO:0043226,GO:0043227,GO:0043229,GO:0043231,GO:0044424,GO:0044444,GO:0044464,GO:0048037,GO:0050662,GO:1901567,GO:1901681
1	29733.c0.g1.i3	507.87	90.32	78.04	72.56	-1.68351	0.0494351	-0.724464	1	0.139342	1	R10A1_ARATH	97.692	1.59e-75	60S ribosomal protein L10a-1	XP_010475633.1	99.231	6.45e-74	AT1G08360.1	97.692	2.19e-75	Ribosomal protein L1p/L10e family
1	29747.c0.g1.i2	18.78	0.12	0	0.16	-6.32691	8.55e-09	-2.79354	1	2.77776	1					EOA28024.1	97.727	6.35e-90	AT2G32280.2	96.923	3.4e-90	GPI inositol-deacylase C putative (DUF1218)						GO:0000785,GO:0003674,GO:0003682,GO:0004871,GO:0004872,GO:0005085,GO:0005488,GO:0005515,GO:0005575,GO:0005634,GO:0005829,GO:0006464,GO:0006807,GO:0008150,GO:0008152,GO:0009314,GO:0009411,GO:0009416,GO:0009605,GO:0009628,GO:0009649,GO:0009881,GO:0009987,GO:0010224,GO:0018298,GO:0019538,GO:0036211,GO:0038023,GO:0042752,GO:0042802,GO:0042803,GO:0043170,GO:0043226,GO:0043227,GO:0043229,GO:0043231,GO:…
1	29753.c2.g2.i1	9.66	0.15	1.25	0.32	-4.97644	0.000325293	2.33333	0.184177	-1.58232	1												PF01152.20
1	29753.c3.g3.i1	11.49	1.06	0.74	0.22	-2.54791	0.00468864	-0.967871	1	-1.46471	1
1	29758.c0.g2.i1	72.48	9.46	21.51	12.93	-2.04153	0.0126533	0.633074	1	-0.478612	1	SSL5_ARATH	80.282	6.59e-84	Protein STRICTOSIDINE SYNTHASE-LIKE 5 {ECO:0000303|PubMed:10777701}	XP_020880080.1	84.615	1.09e-85	AT3G51430.1	80.282	9.06e-84	Calcium-dependent phosphotriesterase superfamily protein
1	29759.c0.g1.i4	7.34	0.09	0.04	0.03	-5.32087	5.26e-06	-1.75511	1	0.201566	1	XTH5_ARATH	92.833	0	Probable xyloglucan endotransglucosylase/hydrolase protein 5	XP_020877838.1	93.266	0	AT5G13870.3	92.857	0	xyloglucan endotransglucosylase/hydrolase 5			ExpAA=101.41^PredHel=5^Topology=o4-21i28-47o53-75i88-110o115-137i	ENOG410XNQK	ath:AT1G30220`KO:K08150	GO:0000151,GO:0000160,GO:0000228,GO:0000793,GO:0000794,GO:0001101,GO:0003006,GO:0003674,GO:0005488,GO:0005515,GO:0005575,GO:0005634,GO:0005694,GO:0005737,GO:0005819,GO:0005829,GO:0006464,GO:0006508,GO:0006511,GO:0006807,GO:0007049,GO:0007165,GO:0007275,GO:0008150,GO:0008152,GO:0009056,GO:0009057,GO:0009524,GO:0009719,GO:0009725,GO:0009733,GO:0009734,GO:0009753,GO:0009755,GO:0009790,GO:0009793,GO:…
1	29760.c1.g2.i1	24.28	2.56	0	0.18	-2.37957	0.0176983	-5.71964	0.0236196	1.97653	1	WRI1_ARATH	86.364	1.11e-33	Ethylene-responsive transcription factor WRI1	CAB81797.1	86.364	1.72e-32	AT3G54320.1	86.364	7.04e-34	Integrase-type DNA-binding superfamily protein				ENOG4111VJ1	ath:AT3G11230	GO:0000166,GO:0000902,GO:0000904,GO:0003006,GO:0003674,GO:0005215,GO:0005216,GO:0005244,GO:0005249,GO:0005261,GO:0005267,GO:0005488,GO:0005515,GO:0005516,GO:0005575,GO:0005887,GO:0008150,GO:0008324,GO:0009653,GO:0009826,GO:0009860,GO:0009932,GO:0009987,GO:0015075,GO:0015077,GO:0015079,GO:0015267,GO:0016021,GO:0016043,GO:0016049,GO:0017076,GO:0019001,GO:0022414,GO:0022803,GO:0022832,GO:0022836,GO:…
1	29764.c0.g1.i1	41.58	2.13	0.19	0.22	-3.35451	0.000324537	-3.801	0.00936282	0.445371	1	CXE7_ARATH	80.503	0	Probable carboxylesterase 7	EOA24330.1	80.864	0	AT2G03550.1	80.503	0	alpha/beta-Hydrolases superfamily protein				ENOG41107IB	ath:AT1G32870
1	29774.c0.g2.i6	118.58	21.49	18.23	19.86	-1.56202	0.028033	-0.763012	0.888485	0.362974	1	NRPBB_ARATH	96.552	1.68e-80	DNA-directed RNA polymerases II, IV and V subunit 11	EOA24967.1	99.138	1.39e-79	AT3G52090.1	96.581	2.22e-80	DNA-directed RNA polymerase RBP11-like protein
1	29775.c4.g2.i1	19.81	3.15	2.47	2.38	-1.74724	0.0454659	-0.844851	1	0.176989	1	IDM3_ARATH	48.739	1.69e-26	Increased DNA methylation 3 {ECO:0000303|PubMed:25684209}	EFH65343.1	90.909	2.03e-72	AT1G76440.3	86.466	5.48e-70	HSP20-like chaperones superfamily protein
1	29778.c0.g1.i1	14.1	2.91	0.08	0.34	-1.42768	0.27999	-5.37546	2.59e-05	2.06062	1					XP_010425806.1	67.339	5.18e-91	AT3G43110.1	77.487	1.32e-87	transmembrane protein						GO:0000166,GO:0003674,GO:0003824,GO:0005488,GO:0005575,GO:0006725,GO:0006778,GO:0006779,GO:0006782,GO:0006783,GO:0006807,GO:0008150,GO:0008152,GO:0008883,GO:0009058,GO:0009507,GO:0009536,GO:0009987,GO:0015994,GO:0015995,GO:0016020,GO:0016491,GO:0016620,GO:0016903,GO:0018130,GO:0019438,GO:0031090,GO:0031969,GO:0033013,GO:0033014,GO:0034641,GO:0036094,GO:0042168,GO:0042170,GO:0042440,GO:0043226,GO:…
1	29788.c0.g2.i1	17.99	1.87	0.65	1.87	-2.28531	0.00508394	-2.03094	0.181878	1.77176	1	SIM_ARATH	89.32	3.31e-40	Cyclin-dependent protein kinase inhibitor SIM {ECO:0000303|PubMed:24399300, ECO:0000303|PubMed:26546445}	Q9LZ78.1	89.32	5.53e-38	AT5G04470.1	89.32	4.56e-40	cyclin-dependent protein kinase inhibitor
1	29794.c2.g1.i1	9.04	0.56	0.08	0.48	-3.10527	0.0125006	-3.03983	0.631747	2.63904	1	ERF36_ARATH	81.667	8.89e-78	Ethylene-responsive transcription factor ERF036	BAB01268.1	81.667	1.1e-75	AT3G16280.2	81.667	9.1e-78	Integrase-type DNA-binding superfamily protein
1	29797.c1.g1.i2	187.61	1.27	0.48	0.26	-6.26506	7.48e-17	-1.84305	0.762678	-0.656909	1	PSBQ1_ARATH	89.103	6.89e-86	Oxygen-evolving enhancer protein 3-1, chloroplastic	XP_006284392.2	92.258	2.27e-88	AT4G21280.1	90.385	1.55e-87	photosystem II subunit QA	PF13959.5
1	29799.c0.g3.i1	10.14	0.55	1.3	0.71	-3.32814	0.000188639	0.662433	1	-0.627729	1	CSLD5_ARATH	96.088	0	Cellulose synthase-like protein D5	EOA39505.1	97.8	0	AT1G02730.1	96.098	0	cellulose synthase-like D5						GO:0005575,GO:0005576,GO:0005618,GO:0030312,GO:0044464,GO:0048046
1	29801.c0.g3.i2	10.33	0.92	2.91	1.81	-2.51441	0.00559653	1.04377	0.829563	-0.487325	1	FB111_ARATH	44.643	1.36e-109	F-box protein At2g17690	ESQ50715.1	52.403	6.38e-124	AT2G17690.1	44.643	1.87e-109	ascorbic acid mannose pathway regulator putative (DUF295)					bna:106427912
1	29802.c0.g1.i1	111.74	46.55	11.51	18.09	-0.406031	1	-2.50597	0.00130408	0.809891	1	GLNB_ARATH	84.524	1.95e-46	Nitrogen regulatory protein P-II homolog	OAP00825.1	86.905	4.5e-46	AT4G01900.1	84.524	2.67e-46	nitrogen regulatory P-II-like protein				COG2124	ath:AT2G30490`KO:K00487	GO:0002376,GO:0003674,GO:0003824,GO:0004620,GO:0004630,GO:0005488,GO:0005543,GO:0005546,GO:0005575,GO:0005737,GO:0005911,GO:0006629,GO:0006950,GO:0006952,GO:0006955,GO:0008081,GO:0008150,GO:0008152,GO:0008289,GO:0009056,GO:0009506,GO:0009605,GO:0009607,GO:0009617,GO:0009814,GO:0009816,GO:0010035,GO:0010038,GO:0016020,GO:0016042,GO:0016298,GO:0016787,GO:0016788,GO:0030054,GO:0035091,GO:0042221,GO:…
1	29814.c0.g1.i5	18.85	2.7	1.49	1.67	-1.88812	0.0176145	-1.40432	0.255568	0.44026	1	UBP1B_ARATH	92	4.06e-174	Oligouridylate-binding protein 1B	EFH69206.1	93.091	2.28e-173	AT1G17370.1	92.029	4.08e-174	oligouridylate binding protein 1B	PF13912.5
1	29823.c2.g1.i18	65.44	10.99	5.9	4.97	-1.65614	0.0197201	-1.42273	0.0907999	0.00565984	1	COPZ3_ARATH	94.475	1.27e-123	Coatomer subunit zeta-3	EOA19287.1	88.557	1.26e-124	AT4G08520.1	94.505	1.28e-123	SNARE-like superfamily protein
1	29823.c2.g3.i2	32.63	0.39	0.4	0.9	-5.32884	5.05e-08	-0.418911	1	1.16604	1	COPZ2_ARATH	95.082	1.17e-82	Coatomer subunit zeta-2	XP_010477207.1	98.361	1.49e-83	AT3G09800.6	92.481	2.31e-85	SNARE-like superfamily protein
1	29827.c0.g1.i2	129.8	31.6	4.17	4.54	-1.15257	0.277511	-3.39951	4.07e-06	0.362861	1					XP_010515125.1	96	5.49e-26	AT3G48140.1	88.235	6.91e-25	B12D protein		sigP:1^11^0.584^YES
1	29836.c0.g1.i2	48.8	4.03	0.06	0.07	-2.76883	0.00150058	-5.99831	1.67e-07	0.191838	1	SAU50_ARATH	96.262	5.74e-73	Auxin-responsive protein SAUR50 {ECO:0000303|PubMed:12036261}	XP_010432377.1	97.196	1.79e-71	AT4G34760.1	96.296	5.76e-73	SAUR-like auxin-responsive protein family						GO:0000166,GO:0001101,GO:0003006,GO:0003674,GO:0003824,GO:0003876,GO:0005488,GO:0005515,GO:0005524,GO:0005575,GO:0005634,GO:0005783,GO:0005829,GO:0006139,GO:0006163,GO:0006164,GO:0006188,GO:0006725,GO:0006753,GO:0006793,GO:0006796,GO:0006807,GO:0007275,GO:0008150,GO:0008152,GO:0009058,GO:0009117,GO:0009123,GO:0009124,GO:0009126,GO:0009127,GO:0009150,GO:0009152,GO:0009156,GO:0009161,GO:0009165,GO:…
1	29844.c0.g1.i1	16.61	0.65	0.61	0.17	-3.72238	0.000125641	-0.562896	1	-1.61433	1	ZHD14_ARATH	87.5	2.1e-95	Zinc-finger homeodomain protein 14	EFH66330.1	88.095	1.18e-94	AT1G14687.1	87.574	1.62e-95	homeobox protein 32
1	29861.c4.g2.i5	21.92	1.97	1.65	2.25	-2.56996	0.00492519	-0.811881	1	0.695383	1
1	29870.c0.g1.i9	201.44	33.94	54.65	55.86	-1.73755	0.0312622	0.156855	1	0.294229	1	RSSA_BRANA	91.103	2.5e-164	40S ribosomal protein SA {ECO:0000255|HAMAP-Rule:MF_03015}	ESQ27950.1	91.241	1.62e-171	AT1G72370.1	93.254	5.59e-162	40s ribosomal protein SA
1	29870.c0.g3.i1	137.9	20.18	22.66	21.97	-1.95361	0.0143919	-0.351701	1	0.220794	1	RSSA1_ARATH	92.664	1.74e-172	40S ribosomal protein Sa-1	ESQ27950.1	93.916	4.29e-175	AT1G72370.2	92.664	1.36e-172	40s ribosomal protein SA
1	29871.c0.g1.i1	74.67	5.48	4.08	5.46	-2.84929	8.87e-05	-1.0034	0.942498	0.651762	1	RCA_ARATH	95.139	1.07e-95	Ribulose bisphosphate carboxylase/oxygenase activase, chloroplastic	XP_020884000.1	97.386	4.37e-101	AT2G39730.2	94.156	9.33e-99	rubisco activase
1	29876.c0.g1.i6	27.3	11.3	0.48	0.71	-0.46902	1	-5.01313	1.96e-08	0.77881	1					XP_010492657.1	72.308	9e-50	AT5G17170.2	71.538	8.6e-51	rubredoxin family protein				COG3491	ath:AT4G03070
1	29882.c0.g2.i3	312.29	37.98	40.22	52.27	-2.20599	0.00278412	-0.406902	1	0.604241	1	S61G2_ARATH	98.551	1.88e-29	Protein transport protein Sec61 subunit gamma-2	P0DI74.1	98.551	3.14e-27	AT5G50460.1	98.571	1.79e-29	secE/sec61-gamma protein transport protein
1	29889.c1.g1.i1	8.05	0.17	0.03	0	-4.58097	5.28e-07	-2.78143	0.7778	-1.77855	1	RAVL1_ARATH	83.74	0	AP2/ERF and B3 domain-containing transcription repressor TEM1	XP_010460355.1	84.741	0	AT1G25560.1	83.784	0	AP2/B3 transcription factor family protein	PF13041.5
1	29890.c0.g1.i1	69.45	2.58	0.89	1.05	-3.82026	1.14e-08	-2.03691	0.0894993	0.409544	1					ESQ39853.1	71.505	4.95e-73	AT5G47060.2	71.875	1.19e-58	hypothetical protein (DUF581)	PF00646.32			COG0443	cme:CymeCp136
1	29890.c0.g2.i2	64.46	7.57	2.66	2.93	-2.23724	0.0099187	-1.9501	0.0665385	0.40093	1					ESQ39853.1	75.862	1.29e-31	AT5G47060.2	77.311	5.29e-31	hypothetical protein (DUF581)
1	29890.c0.g3.i1	823.19	70.96	0.96	0.29	-2.59817	0.0447098	-6.56912	8.42e-07	-1.46611	1	MARD1_ARATH	53.659	5.16e-07	Protein MARD1 {ECO:0000303|PubMed:15159630}	OAO93674.1	87.149	8.01e-140	AT5G20700.1	86.8	1.68e-141	senescence-associated family protein putative (DUF581)						GO:0003006,GO:0003674,GO:0003824,GO:0004721,GO:0004722,GO:0005215,GO:0005216,GO:0005261,GO:0005267,GO:0005488,GO:0005575,GO:0005886,GO:0008150,GO:0008324,GO:0009787,GO:0009788,GO:0009937,GO:0009939,GO:0009966,GO:0009967,GO:0009968,GO:0010029,GO:0010030,GO:0010162,GO:0010646,GO:0010647,GO:0010648,GO:0015075,GO:0015077,GO:0015079,GO:0015267,GO:0016020,GO:0016787,GO:0016788,GO:0016791,GO:0022414,GO:…
1	29894.c0.g1.i6	7.47	0.88	0.09	0.03	-2.19752	0.0274638	-3.545	0.0345771	-1.16325	1	WNK1_ARATH	80.265	0	Serine/threonine-protein kinase WNK1	XP_023641440.1	85.249	0	AT3G04910.1	80.265	0	with no lysine (K) kinase 1
1	29900.c1.g2.i3	22.03	1.98	0.9	0.15	-2.57199	0.000319726	-1.65987	0.14526	-2.33095	1	TSO1_ARATH	91.071	5.4e-100	CRC domain-containing protein TSO1	AAK76693.1	91.071	3.88e-100	AT3G22780.1	91.124	4.61e-100	Tesmin/TSO1-like CXC domain-containing protein				ENOG410Z5TB	ath:AT3G21055	GO:0000122,GO:0000975,GO:0000976,GO:0001067,GO:0001071,GO:0001101,GO:0001558,GO:0003674,GO:0003676,GO:0003677,GO:0003690,GO:0003700,GO:0005488,GO:0005575,GO:0005634,GO:0006139,GO:0006351,GO:0006355,GO:0006357,GO:0006725,GO:0006807,GO:0006950,GO:0006970,GO:0007568,GO:0008150,GO:0008152,GO:0008270,GO:0009058,GO:0009059,GO:0009314,GO:0009416,GO:0009628,GO:0009642,GO:0009646,GO:0009651,GO:0009653,GO:…
1	29911.c0.g2.i1	28.4	7.88	0	0	-0.949541	1	-5.77757	0.0303826	0	1	SWET1_ARATH	91.304	1.49e-55	Bidirectional sugar transporter SWEET1 {ECO:0000303|PubMed:21107422}	EFH69422.1	94.565	1.2e-54	AT1G21460.2	91.304	7.52e-56	Nodulin MtN3 family protein						GO:0000932,GO:0003674,GO:0005488,GO:0005515,GO:0005575,GO:0006139,GO:0006396,GO:0006397,GO:0006417,GO:0006725,GO:0006807,GO:0008150,GO:0008152,GO:0009889,GO:0009890,GO:0009892,GO:0009987,GO:0010468,GO:0010556,GO:0010558,GO:0010603,GO:0010605,GO:0010606,GO:0010608,GO:0010629,GO:0010638,GO:0016070,GO:0016071,GO:0017148,GO:0019222,GO:0030529,GO:0031087,GO:0031323,GO:0031324,GO:0031326,GO:0031327,GO:…
1	29915.c0.g1.i1	7.61	0	0.02	0	-9.56102	9.76e-12	1.72435	1	-1.77636	1	FB213_ARATH	57.928	8.97e-145	F-box protein At3g60790	EFH52841.1	65.042	4e-171	AT3G60790.1	58.017	9.03e-145	F-box family protein
1	29926.c1.g2.i2	11.1	7.58	3.23	2.26	0.397978	1	-1.79064	0.0212851	-0.216789	1	CESA6_ARATH	97.421	0	Cellulose synthase A catalytic subunit 6 [UDP-forming]	BAF01335.1	97.421	0	AT5G64740.1	97.421	0	cellulose synthase 6
1	29929.c2.g2.i1	59.46	14.31	0.13	0.29	-1.29942	0.333035	-7.2559	2.56e-16	1.45055	1	SBT13_ARATH	90.206	0	Subtilisin-like protease SBT1.3 {ECO:0000303|PubMed:16193095}	XP_002864127.2	91.108	0	AT5G51750.1	90.206	0	subtilase 1.3						GO:0002218,GO:0002252,GO:0002253,GO:0002376,GO:0002682,GO:0002684,GO:0003674,GO:0003824,GO:0005488,GO:0005515,GO:0005575,GO:0005737,GO:0006082,GO:0006950,GO:0007165,GO:0008150,GO:0008152,GO:0009314,GO:0009411,GO:0009416,GO:0009611,GO:0009628,GO:0009636,GO:0009694,GO:0009719,GO:0009725,GO:0009733,GO:0009755,GO:0009864,GO:0009867,GO:0009987,GO:0010033,GO:0010046,GO:0010224,GO:0016874,GO:0016879,GO:…
1	29935.c0.g1.i2	51.56	14.64	0.34	0.29	-0.995096	0.690407	-5.77911	2.51e-08	0.0246046	1					XP_010515837.1	84.328	1.35e-65	AT3G53470.1	80.292	2.05e-61	23-bisphosphoglycerate-independent phosphoglycerate mutase						GO:0001071,GO:0003002,GO:0003006,GO:0003674,GO:0003676,GO:0003677,GO:0003700,GO:0005488,GO:0005575,GO:0005634,GO:0006139,GO:0006351,GO:0006725,GO:0006807,GO:0007389,GO:0008150,GO:0008152,GO:0009058,GO:0009059,GO:0009791,GO:0009908,GO:0009987,GO:0010073,GO:0010093,GO:0016070,GO:0018130,GO:0019438,GO:0022414,GO:0030154,GO:0032501,GO:0032502,GO:0032774,GO:0034641,GO:0034645,GO:0034654,GO:0043170,GO:…
1	29947.c0.g1.i1	57.56	5.92	0.72	0.58	-2.43202	0.0459544	-3.38758	0.0175808	-0.0446978	1	LFS_ALLCE	31.507	4.7e-14	Lachrymatory-factor synthase	EFH45497.1	89.172	5.9e-100	AT4G32870.1	86.709	3.25e-100	Polyketide cyclase/dehydrase and lipid transport superfamily protein				COG2801	ath:ArthMp070
1	29956.c0.g1.i1	7.07	2.79	0.54	0.26	-0.367974	1	-2.82754	0.00766214	-0.761156	1	CAAT3_ARATH	91.987	0	Cationic amino acid transporter 3, mitochondrial	XP_020875122.1	90.303	0	AT5G36940.1	91.987	0	cationic amino acid transporter 3
1	29969.c1.g1.i1	9.21	2.89	0	0.09	-0.73944	1	-7.80152	9.69e-08	2.78154	1	GSTUN_ARATH	85.909	8.17e-132	Glutathione S-transferase U23	XP_010472049.1	87.273	2.75e-133	AT1G78320.1	85.973	1.03e-131	glutathione S-transferase TAU 23						GO:0000280,GO:0003006,GO:0006355,GO:0006996,GO:0007049,GO:0007135,GO:0007140,GO:0007142,GO:0008150,GO:0009556,GO:0009889,GO:0009987,GO:0010468,GO:0010556,GO:0016043,GO:0019219,GO:0019222,GO:0022402,GO:0022414,GO:0031323,GO:0031326,GO:0032502,GO:0034293,GO:0043934,GO:0044699,GO:0044702,GO:0044763,GO:0044767,GO:0048236,GO:0048285,GO:0048869,GO:0050789,GO:0050794,GO:0051171,GO:0051252,GO:0051321,GO:…
1	29971.c0.g1.i1	22.15	7.01	0.62	0.36	-0.821951	1	-3.9378	0.000125	-0.486265	1	GFT1_ARATH	82.474	1.9e-37	GDP-fucose transporter 1 {ECO:0000303|PubMed:27381418}	EFH50235.1	84.536	1.04e-37	AT5G19980.1	82.653	1.9e-37	golgi nucleotide sugar transporter 4
1	29980.c0.g1.i1	229.06	0.28	0.09	0.1	-8.72273	1.18e-25	-1.81308	1	0.245703	1												PF01497.17					GO:0000139,GO:0003674,GO:0005215,GO:0005338,GO:0005464,GO:0005575,GO:0005783,GO:0005789,GO:0005794,GO:0006810,GO:0006811,GO:0006820,GO:0008150,GO:0008509,GO:0008514,GO:0008643,GO:0015075,GO:0015165,GO:0015291,GO:0015297,GO:0015711,GO:0015780,GO:0015781,GO:0015790,GO:0015931,GO:0015932,GO:0016020,GO:0016021,GO:0022804,GO:0022857,GO:0022891,GO:0022892,GO:0031090,GO:0031224,GO:0043226,GO:0043227,GO:…
1	29981.c1.g1.i1	49.64	5.03	0.66	0.76	-2.41783	0.000276937	-3.4822	2.1e-05	0.448072	1					AAK55725.1	83.59	3.46e-97	AT3G18560.1	83.673	2.09e-99	hypothetical protein
1	29989.c0.g1.i1	112.78	55.61	3.54	1.95	-0.277929	1	-4.41758	8.38e-08	-0.631762	1	CVIF1_ARATH	34.746	1.55e-09	Cell wall / vacuolar inhibitor of fructosidase 1	XP_018489294.1	81.757	1.63e-81	AT3G17130.1	83.673	7.04e-79	Plant invertase/pectin methylesterase inhibitor superfamily protein
1	29995.c0.g1.i3	27.35	1.72	4.05	5.43	-3.09986	4.99e-06	0.683063	1	0.692717	1	CPY28_ARATH	86.861	4.15e-156	Peptidyl-prolyl cis-trans isomerase CYP28, chloroplastic	CDY12400.1	87.823	2.4e-160	AT5G35100.3	86.617	3.16e-152	Cyclophilin-like peptidyl-prolyl cis-trans isomerase family protein
1	30004.c0.g1.i1	80.85	6.77	9.91	9.18	-2.579	0.00337202	-0.120954	1	0.132196	1					XP_020889521.1	79.885	5.49e-68	AT5G62400.1	70.968	5.41e-42	transmembrane protein
1	30005.c0.g1.i3	13.49	0.3	1.14	0.3	-4.49942	2.67e-07	1.34074	0.734269	-1.57608	1	MYO7_ARATH	67.333	6.82e-72	Myosin-7	XP_010475122.1	66.875	1.8e-71	AT1G04600.1	67.333	9.45e-72	myosin XI A
1	30012.c7.g3.i2	15.1	1.64	0	0	-2.37967	0.0492155	-6.45855	0.011638	0	1	GDL8_ARATH	81.818	1.48e-66	GDSL esterase/lipase At1g28590	EFH69797.1	82.558	5.9e-66	AT1G28590.1	81.818	2.02e-66	GDSL-like Lipase/Acylhydrolase superfamily protein	PF00285.20					GO:0000139,GO:0003006,GO:0003674,GO:0003824,GO:0005575,GO:0006464,GO:0006486,GO:0006807,GO:0007275,GO:0008150,GO:0008152,GO:0008378,GO:0009790,GO:0009793,GO:0009987,GO:0016020,GO:0016021,GO:0016740,GO:0016757,GO:0016758,GO:0019538,GO:0022414,GO:0031090,GO:0031224,GO:0032501,GO:0032502,GO:0036211,GO:0043170,GO:0043412,GO:0043413,GO:0044237,GO:0044238,GO:0044260,GO:0044267,GO:0044422,GO:0044424,GO:…
1	30026.c0.g1.i1	21.45	6.67	0.1	0.02	-0.752306	1	-6.22628	8.25e-05	-1.73574	1	Y1576_ARATH	87.842	0	BTB/POZ domain-containing protein At1g55760	ESQ29892.1	89.666	0	AT1G55760.1	87.879	0	BTB/POZ domain-containing protein				COG0446	ath:AT3G09940`KO:K08232	GO:0000166,GO:0003674,GO:0003824,GO:0005215,GO:0005385,GO:0005488,GO:0005524,GO:0005575,GO:0005886,GO:0008150,GO:0008324,GO:0008551,GO:0015075,GO:0015086,GO:0015399,GO:0015405,GO:0015662,GO:0016020,GO:0016021,GO:0016462,GO:0016463,GO:0016787,GO:0016817,GO:0016818,GO:0016820,GO:0016887,GO:0017076,GO:0017111,GO:0019829,GO:0022804,GO:0022853,GO:0022857,GO:0022890,GO:0022891,GO:0022892,GO:0030554,GO:…
1	30028.c0.g2.i1	98.74	2.78	1.37	3.03	-4.2917	7.63e-08	-1.51486	0.528344	1.30382	1	Y4141_ARATH	67.5	2.51e-57	Uncharacterized protein At4g14100	XP_002885592.2	79.861	1.57e-80	AT3G23760.1	83.077	1.2e-76	transferring glycosyl group transferase
1	30028.c0.g3.i1	20.68	0.26	0.25	0.18	-5.3659	2.55e-11	-0.609648	1	-0.219594	1	Y4141_ARATH	82.022	3.04e-48	Uncharacterized protein At4g14100	XP_010466733.1	95.506	2.45e-54	AT3G23760.1	92.135	1.44e-54	transferring glycosyl group transferase				COG5641	ath:AT5G56860	GO:0000139,GO:0005575,GO:0005789,GO:0010008,GO:0016020,GO:0016021,GO:0031090,GO:0031224,GO:0031902,GO:0044422,GO:0044424,GO:0044425,GO:0044431,GO:0044432,GO:0044433,GO:0044440,GO:0044444,GO:0044446,GO:0044464,GO:0098588,GO:0098805
1	30029.c1.g1.i2	9.64	0.78	0.21	0.31	-2.70989	0.013179	-2.33715	0.355077	0.907073	1	PYL8_ARATH	79.439	2.27e-115	Abscisic acid receptor PYL8	Q9FGM1.1	79.439	3.79e-113	AT5G53160.2	79.439	3.14e-115	regulatory components of ABA receptor 3	PF05904.10
1	30041.c0.g1.i1	374.77	6.27	18.77	17.23	-4.89543	5.49e-09	0.904267	1	0.0886038	1	PSAG_ARATH	90.506	2.82e-94	Photosystem I reaction center subunit V, chloroplastic	XP_010480108.1	92.453	3.15e-95	AT1G55670.1	90.506	3.89e-94	photosystem I subunit G	PF07727.13
1	30041.c0.g2.i1	268.77	1.83	2.02	4.93	-6.29982	7.45e-16	-0.42147	1	1.58253	1	PSAG_ARATH	93.578	6.91e-64	Photosystem I reaction center subunit V, chloroplastic	EFH70776.1	93.578	1.99e-63	AT1G55670.1	93.578	9.53e-64	photosystem I subunit G			ExpAA=84.68^PredHel=3^Topology=o24-46i79-101o111-133i	ENOG410YI9M	osa:4338635	GO:0003674,GO:0003824,GO:0004553,GO:0016787,GO:0016798
1	30045.c0.g1.i1	7.77	0.24	0	0	-4.09295	0.00756172	-4.9145	0.359491	0	1					XP_020868023.1	90.678	6.62e-127	AT1G13635.2	89.787	9.02e-120	DNA glycosylase superfamily protein				COG5083	ath:AT3G09560`KO:K15728
1	30057.c0.g1.i1	15.89	3.95	0.75	0.59	-1.1185	0.377348	-2.84997	0.00469077	-0.11108	1	DEGP8_ARATH	94.086	0	Protease Do-like 8, chloroplastic	XP_010435839.1	93.867	0	AT5G39830.1	94.102	0	Trypsin family protein with PDZ domain-containing protein	PF01535.19	sigP:1^30^0.771^YES
1	30067.c0.g2.i8	80.23	11.09	31.09	32.75	-1.97045	0.0290448	1.00171	0.897449	0.341622	1					XP_010464108.1	45.833	5.61e-26	AT3G05685.1	55.556	3.31e-18	Cystatin/monellin superfamily protein
1	30069.c1.g1.i4	56.02	10.04	4.07	2.93	-1.63056	0.0562157	-1.82541	0.0198391	-0.224186	1	DSP8_ARATH	66.848	4.71e-84	Putative dual specificity protein phosphatase DSP8	EFH40730.1	84.783	8.11e-130	AT5G56610.1	87.097	2.72e-131	Phosphotyrosine protein phosphatases superfamily protein
1	30069.c1.g2.i1	16.32	3.22	0.15	0.24	-1.49088	0.232103	-4.57825	0.000907612	0.753734	1	XXT1_ARATH	66.292	1.75e-28	Xyloglucan 6-xylosyltransferase 1	EFH52945.1	68.182	1.58e-27	AT3G62720.2	66.292	2.39e-28	xylosyltransferase 1
1	30069.c1.g3.i1	13.35	3.94	0.13	0.13	-0.923858	1	-4.81277	0.0285836	0.233538	1	XXT1_ARATH	85.714	5.79e-07	Xyloglucan 6-xylosyltransferase 1				AT3G62720.2	85.714	7.73e-07	xylosyltransferase 1				ENOG410ZP3V	ath:AT3G51770
1	30071.c0.g2.i1	49.51	2.41	0.38	0.42	-3.4216	0.000460162	-3.09099	0.0268468	0.462832	1	NAC56_ARATH	79.839	2.47e-126	NAC transcription factor 56 {ECO:0000303|PubMed:15029955}	OAP06935.1	80.242	9.03e-125	AT3G15510.1	79.92	4.24e-126	NAC domain containing protein 2
1	30074.c0.g2.i2	44.31	5.38	0.08	0.05	-2.24581	0.0993383	-6.35192	7.84e-05	-0.410389	1	GAMT2_ARATH	91.324	2.16e-145	Gibberellic acid methyltransferase 2	XP_010443281.1	94.521	3.57e-148	AT5G56300.1	91.364	2.18e-145	gibberellic acid methyltransferase 2				COG0008	ath:AT5G64050`KO:K01885	GO:0003674,GO:0005488,GO:0005515,GO:0005575,GO:0006091,GO:0006464,GO:0006807,GO:0006950,GO:0008150,GO:0008152,GO:0009266,GO:0009314,GO:0009409,GO:0009416,GO:0009507,GO:0009521,GO:0009522,GO:0009526,GO:0009534,GO:0009535,GO:0009536,GO:0009579,GO:0009628,GO:0009642,GO:0009644,GO:0009645,GO:0009765,GO:0009768,GO:0009941,GO:0009987,GO:0010287,GO:0016020,GO:0016021,GO:0016168,GO:0018298,GO:0019538,GO:…
1	30074.c1.g1.i7	102.06	9.72	1.57	1.66	-2.60841	0.00451415	-3.05382	0.00226832	0.358691	1	PFPA2_ARATH	95.3	0	Pyrophosphate--fructose 6-phosphate 1-phosphotransferase subunit alpha 2 {ECO:0000255|HAMAP-Rule:MF_03185}	EOA34911.1	97.083	0	AT1G76550.1	95.307	0	Phosphofructokinase family protein
1	30076.c0.g1.i2	53.92	32.98	10.03	11.75	0.161224	1	-2.18391	0.0160681	0.477534	1	SAP5_ARATH	90.769	4.32e-80	Zinc finger A20 and AN1 domain-containing stress-associated protein 5	EOA31605.1	87.218	2.41e-79	AT3G12630.1	90.84	4.34e-80	A20/AN1-like zinc finger family protein	PF03000.13
1	30080.c0.g1.i4	7.47	0.75	0	0	-2.37266	0.0178055	-6.18654	0.00560619	0	1					EFH44514.1	85.714	2.86e-107	AT4G14746.1	82.857	5.1e-102	neurogenic locus notch-like protein	PF00437.19					GO:0003674,GO:0003676,GO:0003824,GO:0003964,GO:0004175,GO:0004190,GO:0004518,GO:0004519,GO:0005488,GO:0006139,GO:0006259,GO:0006310,GO:0006725,GO:0006807,GO:0008150,GO:0008152,GO:0008233,GO:0009987,GO:0015074,GO:0016740,GO:0016772,GO:0016779,GO:0016787,GO:0016788,GO:0034061,GO:0034641,GO:0043167,GO:0043169,GO:0043170,GO:0044237,GO:0044238,GO:0044260,GO:0046483,GO:0046872,GO:0070001,GO:0070011,GO:…
1	30090.c1.g1.i1	15.11	1.96	4.49	4.63	-2.0709	0.0184359	0.705275	1	0.307977	1	GPLPC_ARATH	93.254	1.17e-176	Receptor for activated C kinase 1C {ECO:0000303|PubMed:16829549}	XP_010506450.1	96.429	1.21e-178	AT3G18130.1	93.254	1.62e-176	receptor for activated C kinase 1C
1	30091.c0.g1.i1	26.54	6.93	2.76	3.02	-0.998899	0.658554	-1.94285	0.0270037	0.363608	1	FDC2_ARATH	94.444	1.7e-125	Ferredoxin C 2, chloroplastic {ECO:0000303|PubMed:20966083}	XP_002893729.2	83.628	1.26e-125	AT1G32550.1	94.444	2.35e-125	2Fe-2S ferredoxin-like superfamily protein
1	30098.c0.g1.i4	17.67	13.67	6.8	4.33	0.521304	1	-1.54805	0.0228887	-0.378347	1	LRP1A_ARATH	82.796	0	La-related protein 1A	Q940X9.1	82.796	0	AT5G21160.2	82.796	0	LA RNA-binding protein
1	30099.c0.g1.i1	10	8.07	0.25	0.25	0.614131	1	-4.96155	0.00317309	0.23084	1					XP_006279057.2	72.321	1.05e-52	AT1G61840.1	64.286	3.35e-47	Cysteine/Histidine-rich C1 domain family protein					ath:AT4G01800`KO:K03070
1	30101.c1.g1.i2	199.73	26.08	5.32	3.9	-2.14551	0.00701665	-2.78097	6.77e-05	-0.204202	1	RS73_ARATH	96.842	2.97e-133	40S ribosomal protein S7-3	XP_010420293.1	97.895	1.25e-131	AT5G16130.1	96.859	2.99e-133	Ribosomal protein S7e family protein
1	30116.c2.g2.i5	11.91	1.66	0.12	0.1	-1.84789	0.0377539	-4.21547	7.36e-05	-0.126412	1					XP_006294191.2	66.772	4.81e-125	AT2G41550.1	65.312	1.4e-118	Rho termination factor				COG5048	ath:AT3G48430
1	30123.c1.g2.i4	101.75	18.68	28.54	23.41	-1.58412	0.0410487	0.0942552	1	-0.0552154	1	NDBAB_ARATH	99.057	2.17e-73	NADH dehydrogenase [ubiquinone] 1 beta subcomplex subunit 10-B	EFH59389.1	100	5.17e-72	AT3G18410.2	99.065	2.18e-73	NADH dehydrogenase ubiquinone 1 beta subcomplex subunit 10-B-like protein (Complex I subunit NDUFS6)
1	30125.c0.g1.i4	31.38	18.98	0	0.04	0.317743	1	-10.6879	7.36e-18	1.97	1	MYB3_ARATH	59.551	2.49e-30	Transcription factor MYB3	EFH65074.1	73.604	2.11e-87	AT1G71030.1	74.747	4.78e-87	MYB-like 2	PF08541.9			ENOG4111X07	ath:AT1G13280`KO:K10525
1	30132.c0.g1.i2	81.08	7.56	0.5	0.42	-2.5718	0.0199254	-4.47245	2.39e-05	0.0227941	1	JAL20_ARATH	78.667	0	Jacalin-related lectin 20	O80998.1	78.667	0	AT2G25980.1	78.714	0	Mannose-binding lectin superfamily protein				ENOG4111XPA	ath:AT1G21450
1	30137.c0.g1.i2	102.04	2.54	0.43	0.92	-4.46568	1.08e-07	-2.91991	0.0991766	1.21406	1	MDAR2_ARATH	91.525	2.3e-73	Monodehydroascorbate reductase 2 {ECO:0000303|PubMed:16146528}	XP_010456382.1	94.118	2.68e-77	AT5G03630.1	91.525	3.15e-73	Pyridine nucleotide-disulfide oxidoreductase family protein
1	30144.c0.g1.i6	21.05	1.86	1.62	2.14	-2.60563	0.00105727	-0.745318	1	0.625881	1	IDM3_ARATH	40.476	6.02e-28	Increased DNA methylation 3 {ECO:0000303|PubMed:25684209}	EFH65343.1	91.852	4.22e-75	AT1G76440.3	88.636	1.69e-71	HSP20-like chaperones superfamily protein	PF01746.20
1	30146.c0.g1.i1	95.32	11.71	13.24	12.69	-2.12988	0.00198362	-0.418356	1	0.20796	1	SYMC_ARATH	52.439	2.8e-44	Methionine--tRNA ligase, cytoplasmic {ECO:0000305}	EFH56142.1	89.203	0	AT2G40660.1	85.641	0	Nucleic acid-binding OB-fold-like protein
1	30147.c0.g1.i4	233.57	11.32	0.16	0.09	-3.42173	0.0573316	-6.21868	0.00103229	-0.567999	1	BAN_ARATH	65.464	9.61e-73	Anthocyanidin reductase	EOA34485.1	64.433	3.32e-80	AT1G61720.1	65.464	1.32e-72	NAD(P)-binding Rossmann-fold superfamily protein				COG0446	ath:AT3G09940`KO:K08232	GO:0003674,GO:0003676,GO:0003723,GO:0003824,GO:0004518,GO:0004519,GO:0005488,GO:0005575,GO:0006139,GO:0006725,GO:0006807,GO:0008150,GO:0008152,GO:0009451,GO:0009987,GO:0016070,GO:0016787,GO:0016788,GO:0034641,GO:0043170,GO:0043226,GO:0043227,GO:0043229,GO:0043231,GO:0043412,GO:0044237,GO:0044238,GO:0044260,GO:0044424,GO:0044464,GO:0046483,GO:0071704,GO:0090304,GO:0097159,GO:1901360,GO:1901363
1	30147.c0.g2.i1	504.79	28.51	0.64	0	-3.16406	0.139662	-5.53664	0.012032	-2.5479	1	BAN_ARATH	79.221	5.47e-39	Anthocyanidin reductase	EOA34485.1	78.409	1.12e-40	AT1G61720.1	79.221	7.44e-39	NAD(P)-binding Rossmann-fold superfamily protein
1	30147.c0.g3.i4	630.01	8.75	0.72	0.47	-5.20459	0.00113604	-3.9366	0.0503784	-0.349635	1	ANR_GINBI	60.584	7.97e-72	Putative anthocyanidin reductase {ECO:0000303|PubMed:16399014}	XP_010533838.1	71.127	4.9e-98	AT1G61720.1	78.981	8.16e-70	NAD(P)-binding Rossmann-fold superfamily protein						GO:0000166,GO:0003674,GO:0003824,GO:0004672,GO:0004674,GO:0005488,GO:0005524,GO:0005575,GO:0005634,GO:0005774,GO:0006950,GO:0006970,GO:0007165,GO:0008150,GO:0009628,GO:0009651,GO:0009705,GO:0009987,GO:0016020,GO:0016301,GO:0016740,GO:0016772,GO:0016773,GO:0017076,GO:0030554,GO:0031090,GO:0032553,GO:0032555,GO:0032559,GO:0035556,GO:0035639,GO:0036094,GO:0043167,GO:0043168,GO:0043226,GO:0043227,GO:…
1	30155.c0.g1.i1	48.12	0.13	0.12	0.04	-7.61274	7.82e-15	-0.654757	1	-1.15585	1	MLP28_ARATH	91.975	0	MLP-like protein 28	XP_010415772.1	90.504	0	AT1G70830.1	92	0	MLP-like protein 28						GO:0005575,GO:0016020,GO:0016021,GO:0031090,GO:0031224,GO:0033113,GO:0042170,GO:0044422,GO:0044424,GO:0044425,GO:0044435,GO:0044444,GO:0044446,GO:0044464
1	30159.c0.g1.i3	504.19	2.96	0.92	1.09	-6.54161	8.83e-21	-2.21617	0.0125739	0.440767	1	CB4B_ARATH	86.913	1.41e-179	Chlorophyll a-b binding protein CP29.2, chloroplastic	ESQ49183.1	87.584	0	AT3G08940.2	86.913	1.95e-179	light harvesting complex photosystem II
1	30174.c0.g1.i2	18.9	0.1	0	0	-6.38417	1.95e-06	-2.02666	1	0	1	PMEI9_ARATH	53.906	5.66e-45	Pectinesterase inhibitor 9 {ECO:0000305}	XP_018454962.1	82.317	2.37e-79	AT4G12390.1	82.927	3.02e-79	pectin methylesterase inhibitor 1						GO:0000166,GO:0003674,GO:0003824,GO:0005488,GO:0005524,GO:0006464,GO:0006807,GO:0008150,GO:0008152,GO:0009987,GO:0016567,GO:0016740,GO:0017076,GO:0019538,GO:0030554,GO:0032446,GO:0032553,GO:0032555,GO:0032559,GO:0035639,GO:0036094,GO:0036211,GO:0043167,GO:0043168,GO:0043170,GO:0043412,GO:0044237,GO:0044238,GO:0044260,GO:0044267,GO:0070647,GO:0071704,GO:0097159,GO:0097367,GO:1901265,GO:1901363,GO:…
1	30177.c6.g1.i2	16.26	0.54	2.76	4.61	-3.9625	0.000168246	1.79007	0.674054	0.939153	1					XP_010435824.1	83.186	1.2e-58	AT5G39240.1	70.94	9.71e-48	transcription factor UPBEAT-like protein	PF00891.17
1	30178.c0.g1.i1	5.99	0.17	0	0	-3.93727	0.00619407	-3.41449	1	0	1	CLE41_ARATH	78.788	1.58e-29	CLAVATA3/ESR (CLE)-related protein 41	OAP03425.1	78.788	3.41e-28	AT3G24770.1	79	1.59e-29	CLAVATA3/ESR-RELATED 41	PF09133.9
1	30182.c0.g1.i4	127.21	14.82	12.65	12.5	-2.25929	0.00114437	-0.771773	0.821807	0.24976	1	TKTC1_ARATH	97.838	0	Transketolase-1, chloroplastic	AEE80104.1	97.838	0	AT3G60750.1	97.838	0	Transketolase
1	30200.c0.g2.i1	185.4	53.87	13.65	12.81	-0.979583	0.691606	-2.52492	1.22e-05	0.148032	1	OLP1_SOLLC	73.743	1.81e-93	Osmotin-like protein	ANM62309.1	85.652	1.81e-142	AT2G28790.2	85.652	1.5e-144	Pathogenesis-related thaumatin superfamily protein
1	30203.c0.g1.i5	11.16	1.13	1.25	0.94	-2.43079	0.0324023	-0.383518	1	-0.0327779	1	TL1Y_ARATH	76.652	7.01e-98	Thylakoid lumenal 17.9 kDa protein, chloroplastic	Q9SW33.1	76.652	1.17e-95	AT4G24930.1	76.754	7.05e-98	thylakoid lumenal 17.9 kDa protein chloroplast
1	30209.c0.g1.i3	6.75	0	0.28	0.29	-8.35445	1.58e-06	3.88951	0.853311	0.264566	1	GRXC7_ARATH	94.737	1.75e-77	Glutaredoxin-C7	XP_010435683.1	96.241	2.88e-87	AT3G02000.1	94.737	2.41e-77	Thioredoxin superfamily protein						GO:0000166,GO:0003674,GO:0003824,GO:0004616,GO:0005488,GO:0005575,GO:0005739,GO:0005829,GO:0006082,GO:0006520,GO:0006573,GO:0006574,GO:0006807,GO:0008150,GO:0008152,GO:0008442,GO:0009056,GO:0009063,GO:0009081,GO:0009083,GO:0009987,GO:0016054,GO:0016491,GO:0016614,GO:0016616,GO:0019752,GO:0036094,GO:0043226,GO:0043227,GO:0043229,GO:0043231,GO:0043436,GO:0044237,GO:0044238,GO:0044248,GO:0044281,GO:…
1	30215.c1.g1.i1	25.19	10.11	1.8	2.17	-0.352873	1	-2.95993	0.002654	0.393659	1	PROT1_ARATH	86.719	2.24e-62	Proline transporter 1	XP_022574125.1	87.5	2.58e-61	AT2G39890.3	86.719	6.97e-63	proline transporter 1				ENOG410YSWC	ath:AT1G72320`KO:K14790	GO:0000151,GO:0003674,GO:0005488,GO:0005515,GO:0005575,GO:0006508,GO:0006511,GO:0006807,GO:0008150,GO:0008152,GO:0009056,GO:0009057,GO:0009987,GO:0010498,GO:0019538,GO:0019941,GO:0030163,GO:0032991,GO:0043161,GO:0043170,GO:0043632,GO:0044237,GO:0044238,GO:0044248,GO:0044260,GO:0044265,GO:0044424,GO:0044464,GO:0051603,GO:0071704,GO:1901564,GO:1901565,GO:1901575,GO:1902494,GO:1990234
1	30217.c2.g1.i5	95.18	7.51	0.77	0.34	-2.78278	0.000341426	-3.73137	0.00010042	-0.76889	1	PAE5_ARATH	86.139	2.36e-130	Pectin acetylesterase 5 {ECO:0000303|PubMed:25115560}	EOA30643.1	87.129	6.57e-130	AT3G09410.1	86.207	2.22e-130	Pectinacetylesterase family protein	PF03004.13
1	30222.c0.g3.i2	57.46	10.05	5.33	4.38	-1.62478	0.0493048	-1.44116	0.169134	-0.0836468	1	VATG2_ARATH	86.408	4.09e-49	V-type proton ATPase subunit G2	XP_010439141.1	89.32	1.04e-48	AT4G23710.1	86.538	4.1e-49	vacuolar ATP synthase subunit G2
1	30226.c0.g1.i2	90.13	1.12	0.15	0.08	-5.46158	3.09e-06	-3.11399	0.349708	-0.573288	1					AEE74835.1	67.213	9.32e-14	AT3G09922.1	67.213	1.19e-15	induced by phosphate starvation1
1	30232.c0.g1.i1	15.97	0	0	0	-6.33189	0.00330683	5.13e-15	1	0	1	DF122_ARATH	54.054	1.24e-25	Defensin-like protein 122	EOA34433.1	70.27	3.13e-31	AT3G43505.1	54.054	1.7e-25	low-molecular-weight cysteine-rich 30						GO:0000166,GO:0000959,GO:0003674,GO:0003676,GO:0003677,GO:0003697,GO:0003723,GO:0005488,GO:0005507,GO:0005524,GO:0005575,GO:0005739,GO:0006139,GO:0006396,GO:0006397,GO:0006725,GO:0006807,GO:0006950,GO:0008150,GO:0008152,GO:0009266,GO:0009409,GO:0009451,GO:0009628,GO:0009987,GO:0016070,GO:0016071,GO:0016553,GO:0016554,GO:0016556,GO:0017076,GO:0030554,GO:0032553,GO:0032555,GO:0032559,GO:0034641,GO:…
1	30241.c0.g2.i1	373.18	29.86	4.39	6.01	-2.73382	0.00315598	-3.18943	0.00072845	0.724626	1															COG5095	ath:AT1G04950`KO:K03131
1	30241.c0.g3.i2	757.3	50.08	37.29	47.71	-2.94725	0.000940128	-0.893106	1	0.609568	1
1	30246.c0.g2.i1	48.39	5.27	4.76	7.57	-2.35156	0.0263425	-0.71942	1	0.945133	1
1	30251.c0.g1.i2	30.78	0.56	0.19	0.39	-4.70698	6.5e-05	-1.58223	1	1.04197	1	IPYR4_ARATH	97.059	8.14e-70	Soluble inorganic pyrophosphatase 4 {ECO:0000303|PubMed:15135060}	XP_013661160.1	98.039	2.96e-68	AT3G53620.1	97.087	2.13e-70	pyrophosphorylase 4
1	30256.c0.g1.i2	15.63	0.06	0	0	-6.73894	1.4e-08	-2.01608	1	0	1					EFH69889.1	66.887	3.52e-32	AT1G30515.1	64.626	6.17e-33	GATA zinc finger protein				COG0508	ath:AT3G06850`KO:K09699	GO:0000166,GO:0001932,GO:0001934,GO:0003674,GO:0003824,GO:0004672,GO:0004674,GO:0004702,GO:0004709,GO:0004871,GO:0005057,GO:0005488,GO:0005524,GO:0005575,GO:0005737,GO:0006464,GO:0006468,GO:0006793,GO:0006796,GO:0006807,GO:0006950,GO:0007165,GO:0007346,GO:0008150,GO:0008152,GO:0009893,GO:0009987,GO:0010562,GO:0010604,GO:0016301,GO:0016310,GO:0016740,GO:0016772,GO:0016773,GO:0017076,GO:0019220,GO:…
1	30260.c0.g2.i3	588.4	24.85	37.04	41.11	-3.66745	6.18e-07	-0.0517806	1	0.390995	1	TPIS_ARATH	97.561	1.44e-81	Triosephosphate isomerase, cytosolic	EFH52561.1	98.374	1.1e-79	AT3G55440.1	97.561	1.99e-81	triosephosphate isomerase				ENOG4112B2N	ath:AT5G64520`KO:K10879
1	30260.c0.g3.i2	707.95	53.09	83.45	100.3	-2.81536	0.000148675	0.0375777	1	0.454867	1	TPIS_ARATH	97.436	3.31e-36	Triosephosphate isomerase, cytosolic	XP_010504398.1	98.718	1.12e-34	AT3G55440.1	97.436	4.53e-36	triosephosphate isomerase
1	30260.c0.g4.i2	341.54	22.17	21.71	25.55	-3.11328	2.14e-06	-0.561158	1	0.484899	1	TPIS_ARATH	97.059	4.88e-153	Triosephosphate isomerase, cytosolic	ESQ44911.1	99.58	2.23e-155	AT3G55440.1	97.059	6.74e-153	triosephosphate isomerase
1	30281.c0.g1.i2	23.37	4.23	7.23	6.27	-1.58979	0.042629	0.25058	1	0.0858916	1	KN13B_ARATH	94.622	0	Kinesin-like protein KIN-13B {ECO:0000305}	EOA30013.1	96.943	0	AT3G16060.1	94.63	0	ATP binding microtubule motor family protein
1	30302.c0.g2.i4	10.39	1.29	0.94	1.96	-2.11178	0.0244642	-0.944501	1	1.29456	1	PDPK1_ARATH	30.723	4.89e-10	3-phosphoinositide-dependent protein kinase 1	XP_020876801.1	93.889	3.96e-122	AT5G08160.1	93.923	4.71e-124	serine/threonine protein kinase 3	PF00122.19
1	30304.c1.g1.i3	11.91	0.12	0.17	0.2	-5.70677	2.28e-10	-0.0019251	1	0.385069	1	G6PD1_ARATH	95.047	0	Glucose-6-phosphate 1-dehydrogenase 1, chloroplastic	Q43727.2	95.047	0	AT5G35790.1	95.059	0	glucose-6-phosphate dehydrogenase 1				ENOG410YDXB	ath:AT3G17800	GO:0003006,GO:0003674,GO:0003676,GO:0003723,GO:0003735,GO:0005198,GO:0005488,GO:0005575,GO:0005840,GO:0006412,GO:0006518,GO:0006807,GO:0007275,GO:0008150,GO:0008152,GO:0009058,GO:0009059,GO:0009507,GO:0009526,GO:0009532,GO:0009536,GO:0009570,GO:0009719,GO:0009725,GO:0009735,GO:0009790,GO:0009793,GO:0009941,GO:0009987,GO:0010033,GO:0016020,GO:0019538,GO:0019843,GO:0022414,GO:0030529,GO:0031967,GO:…
1	30311.c10.g1.i1	37.82	1.28	2.83	5.08	-3.91417	6.7e-05	0.61994	1	1.02084	1	RHA2B_ARATH	66.901	4.32e-60	E3 ubiquitin-protein ligase RHA2B {ECO:0000305}	ESQ39953.1	66.897	3.62e-60	AT2G01150.3	65.068	5.68e-60	RING-H2 finger protein 2B				COG0654	ath:AT5G24160`KO:K00511
1	30320.c1.g1.i16	13.74	0.71	0.04	0.04	-3.31813	1.61e-06	-4.47399	0.000136739	0.244536	1	PSY_ARATH	92.647	0	Phytoene synthase, chloroplastic	XP_010453906.1	94.39	0	AT5G17230.4	92.665	0	PHYTOENE SYNTHASE	PF03321.12
1	30320.c1.g2.i2	24.49	2.14	0.27	0.14	-2.62857	0.0246999	-3.25666	0.361855	-0.566832	1	PSY_ARATH	96.226	2.37e-26	Phytoene synthase, chloroplastic	BAD95130.1	96.226	4.58e-27	AT5G17230.3	94.545	2.83e-26	PHYTOENE SYNTHASE
1	30323.c0.g1.i4	82.38	45.57	0.73	0.59	-0.0503799	1	-6.35183	2.16e-09	-0.109784	1	NLTL2_ARATH	32.727	5.1e-13	Non-specific lipid-transfer protein-like protein At2g13820	XP_010497021.1	76.882	1.11e-73	AT2G48130.6	79.032	2.05e-74	Bifunctional inhibitor/lipid-transfer protein/seed storage 2S albumin superfamily protein				ENOG41115EW	ath:AT1G14687	GO:0000166,GO:0003674,GO:0003824,GO:0004672,GO:0004674,GO:0004712,GO:0004871,GO:0005488,GO:0005524,GO:0005575,GO:0005829,GO:0006464,GO:0006468,GO:0006793,GO:0006796,GO:0006807,GO:0006996,GO:0007165,GO:0008150,GO:0008152,GO:0009657,GO:0009658,GO:0009987,GO:0016043,GO:0016301,GO:0016310,GO:0016740,GO:0016772,GO:0016773,GO:0017076,GO:0019538,GO:0030554,GO:0032553,GO:0032555,GO:0032559,GO:0035556,GO:…
1	30327.c0.g1.i2	14.15	0.44	0.65	0.44	-4.03919	4.59e-06	0.0410699	1	-0.344771	1	CDC21_ARATH	95.122	4.34e-141	Cell division cycle 20.1, cofactor of APC complex	XP_020872331.1	94.608	4.94e-140	AT4G33270.1	95.122	5.99e-141	Transducin family protein / WD-40 repeat family protein			ExpAA=68.70^PredHel=3^Topology=o10-32i45-67o82-104i	ENOG410XP1S	ath:AT1G77610
1	30333.c0.g1.i2	122.85	4.06	21.85	17.55	-3.80713	6.28e-06	1.8194	0.0156793	-0.0531938	1	GDL62_ARATH	89.826	0	GDSL esterase/lipase At4g10955	XP_010455487.1	92.464	0	AT4G10955.2	89.826	0	alpha/beta-Hydrolases superfamily protein				ENOG410XQTV	ath:AT5G46570`KO:K14500
1	30348.c0.g1.i3	75.16	7.98	0.26	0.36	-2.41713	0.0070609	-5.22229	0.000106729	0.674342	1	PLAT2_ARATH	84.615	1.48e-98	PLAT domain-containing protein 2 {ECO:0000305}	OAP09051.1	85.165	7.56e-97	AT2G22170.1	84.699	1.49e-98	Lipase/lipooxygenase PLAT/LH2 family protein
1	30353.c0.g2.i4	9.48	0.27	0	0	-4.30416	0.000692905	-3.95928	1	0	1	ML3_ARATH	52.448	1.85e-29	MD-2-related lipid-recognition protein 3 {ECO:0000303|PubMed:23314818}	Q9FF98.1	52.448	3.09e-27	AT5G23820.1	52.448	2.54e-29	MD-2-related lipid recognition domain-containing protein
1	30353.c0.g3.i1	621	329.22	4.95	10.87	-0.17015	1	-6.55006	4.85e-18	1.29062	1	ML3_ARATH	72	5.29e-44	MD-2-related lipid-recognition protein 3 {ECO:0000303|PubMed:23314818}	XP_010510809.1	80.612	2.48e-47	AT5G23820.1	72	7.28e-44	MD-2-related lipid recognition domain-containing protein	PF02566.18					GO:0000166,GO:0003674,GO:0003824,GO:0004430,GO:0004672,GO:0004674,GO:0005488,GO:0005515,GO:0005524,GO:0005575,GO:0005829,GO:0006464,GO:0006468,GO:0006629,GO:0006644,GO:0006650,GO:0006793,GO:0006796,GO:0006807,GO:0006950,GO:0006970,GO:0008150,GO:0008152,GO:0009628,GO:0009651,GO:0009987,GO:0016020,GO:0016301,GO:0016310,GO:0016740,GO:0016772,GO:0016773,GO:0017076,GO:0019538,GO:0019637,GO:0030258,GO:…
1	30353.c0.g4.i2	324.29	162.7	0.22	1.53	-0.0400499	1	-9.81302	2.99e-16	2.65318	1	ML3_ARATH	82.051	8.74e-07	MD-2-related lipid-recognition protein 3 {ECO:0000303|PubMed:23314818}													GO:0003674,GO:0003824,GO:0003992,GO:0005488,GO:0005507,GO:0005515,GO:0005575,GO:0005739,GO:0006082,GO:0006520,GO:0006525,GO:0006526,GO:0006807,GO:0006950,GO:0006952,GO:0008150,GO:0008152,GO:0008483,GO:0008652,GO:0009058,GO:0009064,GO:0009084,GO:0009507,GO:0009532,GO:0009536,GO:0009570,GO:0009605,GO:0009607,GO:0009617,GO:0009987,GO:0016053,GO:0016740,GO:0016769,GO:0019752,GO:0019842,GO:0030170,GO:…
1	30367.c0.g4.i1	10.99	3.23	0.97	0.83	-0.900923	0.720425	-2.23077	0.0103026	0.0081037	1	DOF21_ARATH	73.469	1.41e-114	Dof zinc finger protein DOF2.1	EFH57248.1	76.027	1.3e-116	AT2G28510.1	73.469	1.95e-114	Dof-type zinc finger DNA-binding family protein
1	30367.c0.g5.i1	11.48	1.16	0.23	0.15	-2.48452	0.00524986	-2.70256	0.047104	-0.366602	1	DOF53_ARATH	84.528	3.81e-141	Dof zinc finger protein DOF5.3	EOA13642.1	79.692	3.73e-154	AT5G60200.1	84.586	3.84e-141	TARGET OF MONOPTEROS 6
1	30370.c0.g1.i1	53.69	1.2	2.63	2.58	-4.68067	7.34e-10	0.598044	1	0.225107	1	THLP1_ARATH	62.055	2.83e-100	Thaumatin-like protein 1 {ECO:0000303|PubMed:15988566}	EFH45111.1	87.537	2.36e-158	AT4G38660.1	82.493	8.39e-154	Pathogenesis-related thaumatin superfamily protein				COG0443	ath:AT4G24280`KO:K03283
1	30376.c1.g1.i1	109.24	9.86	4.77	2.53	-2.60278	0.000894769	-1.57566	0.223674	-0.657929	1	TATA_ARATH	91.463	6.88e-42	Sec-independent protein translocase protein TATA, chloroplastic	EFH50706.1	92.683	2.69e-40	AT5G28750.1	91.463	9.46e-42	Bacterial sec-independent translocation protein mttA/Hcf106	PF00675.19
1	30384.c0.g1.i3	63.03	0.52	0.82	0.82	-5.99086	1.68e-13	0.105895	1	0.215629	1					EOA21784.1	67.066	1.2e-41	AT5G02160.1	61.446	1.3e-42	transmembrane protein			ExpAA=20.29^PredHel=1^Topology=i129-148o	ENOG410YRBB	ath:AT5G62200	GO:0003674,GO:0003824,GO:0006725,GO:0006790,GO:0006807,GO:0008150,GO:0008152,GO:0009058,GO:0009403,GO:0009404,GO:0009700,GO:0009719,GO:0009725,GO:0009733,GO:0009889,GO:0009891,GO:0009893,GO:0009987,GO:0010033,GO:0010120,GO:0010252,GO:0010279,GO:0016874,GO:0016879,GO:0016881,GO:0018130,GO:0019222,GO:0019438,GO:0019748,GO:0031323,GO:0031325,GO:0031326,GO:0031328,GO:0034641,GO:0042221,GO:0042430,GO:…
1	30384.c0.g2.i1	18.93	2.4	1.82	0.97	-2.0712	0.0210465	-0.931692	1	-0.707554	1					AAG40386.1	100	1.21e-21	AT5G02160.1	100	9.91e-24	transmembrane protein
1	30387.c0.g1.i11	22.06	0.76	0.07	0	-4.03023	4.46e-06	-3.80277	0.0131359	-3.71555	1	WRI1_ARATH	67.839	2.69e-61	Ethylene-responsive transcription factor WRI1	XP_010427124.1	69.892	3.2e-61	AT3G54320.2	67.839	4.95e-62	Integrase-type DNA-binding superfamily protein
1	30387.c0.g2.i3	65.28	5.57	0.14	0.46	-2.71523	0.000173382	-5.58893	7.02e-08	1.72287	1	WRI1_ARATH	68.072	1.79e-63	Ethylene-responsive transcription factor WRI1	XP_010427124.1	73.78	1.98e-63	AT3G54320.2	68.072	1.88e-64	Integrase-type DNA-binding superfamily protein				ENOG410YGT5	ath:AT1G75310	GO:0001071,GO:0003674,GO:0003700,GO:0005488,GO:0005543,GO:0005575,GO:0005634,GO:0005829,GO:0005886,GO:0006355,GO:0008150,GO:0008289,GO:0009536,GO:0009605,GO:0009607,GO:0009620,GO:0009889,GO:0010468,GO:0010556,GO:0016020,GO:0019219,GO:0019222,GO:0031323,GO:0031326,GO:0035091,GO:0043167,GO:0043168,GO:0043207,GO:0043226,GO:0043227,GO:0043229,GO:0043231,GO:0044424,GO:0044444,GO:0044464,GO:0050789,GO:…
1	30400.c1.g1.i15	8.37	0.02	0	0	-7.59032	6.76e-10	-2.02763	1	0	1	ARFK_ARATH	82.64	0	Auxin response factor 11	XP_020882703.1	83.183	0	AT2G46530.1	82.671	0	auxin response factor 11						GO:0000166,GO:0000226,GO:0000902,GO:0000904,GO:0003674,GO:0003774,GO:0003777,GO:0003824,GO:0005488,GO:0005515,GO:0005524,GO:0005575,GO:0005618,GO:0005795,GO:0005871,GO:0005874,GO:0005875,GO:0005886,GO:0006928,GO:0006996,GO:0007010,GO:0007017,GO:0007018,GO:0007019,GO:0008017,GO:0008092,GO:0008150,GO:0009505,GO:0009531,GO:0009653,GO:0009832,GO:0009834,GO:0009888,GO:0009987,GO:0010087,GO:0010089,GO:…
1	30401.c0.g3.i1	128.05	23.01	32.86	35.66	-1.59135	0.0336339	-0.0248632	1	0.366582	1					ESQ28507.1	98.413	1.39e-17	AT1G67785.1	100	8.63e-20	hypothetical protein
1	30402.c0.g1.i6	24.79	1.89	0.87	0.49	-2.79045	0.000153452	-1.69687	0.201839	-0.566779	1	KINB3_ARATH	92.105	4.26e-60	SNF1-related protein kinase regulatory subunit beta-3	EFH55377.1	90.833	3.76e-60	AT2G28060.4	92.174	2.33e-60	5'-AMP-activated protein kinase beta-2 subunit protein
1	30402.c0.g2.i6	11.89	5.62	2.13	1.09	-0.157962	1	-1.90395	0.0346195	-0.739307	1	KINB3_ARATH	88.596	4.25e-68	SNF1-related protein kinase regulatory subunit beta-3	EFH55377.1	87.5	7.18e-69	AT2G28060.4	88.596	5.86e-68	5'-AMP-activated protein kinase beta-2 subunit protein
1	30405.c0.g1.i1	37.25	4.1	2.95	2.32	-2.31024	0.00252352	-0.999733	0.75522	-0.0930046	1	STEP1_ARATH	84.722	3.49e-63	Stress enhanced protein 1, chloroplastic {ECO:0000305}	Q9M7I9.1	84.722	5.82e-61	AT4G34190.1	84.722	4.81e-63	stress enhanced protein 1
1	30405.c1.g1.i1	27.11	7.81	2.85	3.19	-0.826265	0.888121	-1.95121	0.0340922	0.405333	1	DNJ20_ARATH	87.701	1.69e-109	Chaperone protein dnaJ 20, chloroplastic	XP_010435221.1	85.864	3.49e-109	AT4G13830.2	87.701	2.33e-109	DNAJ-like 20
1	30409.c1.g1.i1	15.84	0.18	0.01	0.01	-5.50974	1.42e-06	-3.62759	0.248798	0.230842	1	BBE27_ARATH	85.874	0	Berberine bridge enzyme-like 27 {ECO:0000303|PubMed:26037923}	EFH39839.1	84.758	0	AT5G44410.1	85.9	0	FAD-binding Berberine family protein
1	30410.c0.g1.i3	25.06	2.13	0.85	0.73	-2.74477	0.000201234	-1.82107	0.124628	0.00525649	1	NPC2_ARATH	91.348	0	Non-specific phospholipase C2	EOA26860.1	89.382	0	AT2G26870.1	91.365	0	non-specific phospholipase C2
1	30434.c0.g1.i1	115.46	1.31	0	0.38	-5.69033	2.19e-06	-5.56132	0.11099	3.66894	1	FLA9_ARATH	93.694	2.85e-72	Fasciclin-like arabinogalactan protein 9	AAN60339.1	91.216	8.77e-72	AT1G03870.1	93.694	3.93e-72	FASCICLIN-like arabinoogalactan 9				COG1052	ath:AT1G79870`KO:K15919	GO:0005575,GO:0005634,GO:0043226,GO:0043227,GO:0043229,GO:0043231,GO:0044424,GO:0044464
1	30449.c0.g1.i1	284.2	5.88	43.56	47.73	-4.65007	4.71e-10	2.2703	0.00311467	0.373815	1	RR17_ARATH	86.275	3.97e-48	30S ribosomal protein S17, chloroplastic	EOA33944.1	91.919	7.26e-48	AT1G79850.1	86.408	3.98e-48	ribosomal protein S17				ENOG410Y0FV	ath:AT2G21870	GO:0000959,GO:0003674,GO:0003676,GO:0003723,GO:0003824,GO:0004518,GO:0004519,GO:0005488,GO:0005575,GO:0005739,GO:0006139,GO:0006725,GO:0006807,GO:0008150,GO:0008152,GO:0009451,GO:0009987,GO:0016070,GO:0016071,GO:0016556,GO:0016787,GO:0016788,GO:0034641,GO:0043170,GO:0043226,GO:0043227,GO:0043229,GO:0043231,GO:0043412,GO:0044237,GO:0044238,GO:0044260,GO:0044424,GO:0044444,GO:0044464,GO:0046483,GO:…
1	30453.c1.g1.i1	33.72	0.16	0.17	0	-6.44988	5.85e-08	-0.309976	1	-1.7763	1	PHL6_ARATH	83.544	1.66e-37	Myb family transcription factor PHL6 {ECO:0000305}	ABL86247.1	87.342	4.66e-40	AT3G13040.3	83.544	2.25e-37	myb-like HTH transcriptional regulator family protein				COG0515	ath:AT4G28650	GO:0003674,GO:0005488,GO:0006810,GO:0006869,GO:0008150,GO:0008289,GO:0044699,GO:0044765,GO:0051179,GO:0051234,GO:0071702,GO:1902578
1	30455.c1.g1.i3	17.76	2.53	0.41	0.26	-1.87504	0.155089	-3.04682	0.00952693	-0.402498	1	HTT1_ARATH	66.667	8.72e-113	Protein HEAT-INDUCED TAS1 TARGET 1 {ECO:0000303|PubMed:24728648}	XP_020877798.1	69.091	1.04e-119	AT4G29770.2	66.667	1.08e-113	target of trans acting-siR480/255 protein
1	30465.c0.g1.i1	8.6	0.65	0.28	0.27	-2.8078	0.00060699	-1.7674	0.260329	0.284197	1	RMA1_ARATH	51.19	6.44e-23	E3 ubiquitin-protein ligase RMA1	XP_020885050.1	55.684	4.04e-128	AT2G42030.1	53.241	1.06e-123	RING/U-box superfamily protein
1	30466.c0.g2.i4	8.7	0.39	1.64	0.94	-3.53915	1.72e-05	1.54733	0.34673	-0.543378	1	STR11_ARATH	94.771	1.69e-98	Rhodanese-like domain-containing protein 11, chloroplastic	AAY25411.1	94.771	1.92e-96	AT4G24750.1	94.771	2.33e-98	Rhodanese/Cell cycle control phosphatase superfamily protein
1	30471.c0.g1.i1	29.6	13.85	3.38	2.2	-0.162058	1	-2.54674	0.000225823	-0.337561	1					EOA37462.1	78.723	2.78e-35	AT1G32460.1	81.72	2.59e-36	hypothetical protein
1	30475.c0.g1.i2	326.6	53.79	1.08	1.21	-1.59213	0.38259	-6.0943	1.98e-11	0.41405	1	CHSY_ARATH	98.489	0	Chalcone synthase	CDU43751.1	98.792	0	AT5G13930.1	98.494	0	Chalcone and stilbene synthase family protein			ExpAA=89.15^PredHel=4^Topology=i7-29o44-63i70-92o220-242i	ENOG41104VK	ath:AT4G23410	GO:0003674,GO:0003824,GO:0004325,GO:0005575,GO:0005739,GO:0006725,GO:0006778,GO:0006779,GO:0006783,GO:0006807,GO:0008150,GO:0008152,GO:0009058,GO:0009535,GO:0009987,GO:0016020,GO:0016829,GO:0018130,GO:0019438,GO:0031090,GO:0031969,GO:0033013,GO:0033014,GO:0034357,GO:0034641,GO:0042168,GO:0042170,GO:0042440,GO:0042651,GO:0043226,GO:0043227,GO:0043229,GO:0043231,GO:0044237,GO:0044249,GO:0044271,GO:…
1	30479.c0.g1.i1	20.71	2.31	17.76	13.49	-2.20889	0.0015004	2.33533	0.000458163	-0.122971	1	PP358_ARATH	87.805	0	Pentatricopeptide repeat-containing protein At4g39620, chloroplastic {ECO:0000305}	ESQ53208.1	90.446	0	AT4G39620.1	87.805	0	Tetratricopeptide repeat (TPR)-like superfamily protein						GO:0005575,GO:0005739,GO:0006082,GO:0006091,GO:0006099,GO:0006101,GO:0006121,GO:0006461,GO:0006464,GO:0006807,GO:0008150,GO:0008152,GO:0009987,GO:0016043,GO:0018065,GO:0018293,GO:0019538,GO:0019752,GO:0022607,GO:0022900,GO:0022904,GO:0033108,GO:0034552,GO:0034553,GO:0034622,GO:0036211,GO:0043170,GO:0043226,GO:0043227,GO:0043229,GO:0043231,GO:0043412,GO:0043436,GO:0043623,GO:0043933,GO:0044085,GO:…
1	30482.c0.g2.i2	74.83	7.37	0.78	0.72	-2.56185	0.000901308	-3.71172	1.13e-06	0.181185	1	FAP3_ARATH	82.935	1.28e-163	Fatty-acid-binding protein 3, chloroplastic	EFH70705.1	86.007	6.13e-168	AT1G53520.1	82.993	1.43e-163	Chalcone-flavanone isomerase family protein
1	30487.c1.g1.i1	9.88	0.69	0.08	0.04	-2.87313	0.00321796	-3.46056	0.0736138	-0.567844	1	MES9_ARATH	83.922	2.26e-163	Methylesterase 9	EOA18137.1	87.16	8.91e-168	AT4G37150.1	83.922	3.13e-163	methyl esterase 9						GO:0001071,GO:0003674,GO:0003676,GO:0003677,GO:0003700,GO:0005488,GO:0005515,GO:0005575,GO:0005634,GO:0006139,GO:0006351,GO:0006725,GO:0006807,GO:0007165,GO:0007602,GO:0008150,GO:0008152,GO:0009058,GO:0009059,GO:0009314,GO:0009416,GO:0009581,GO:0009582,GO:0009583,GO:0009585,GO:0009605,GO:0009628,GO:0009637,GO:0009642,GO:0009645,GO:0009692,GO:0009693,GO:0009889,GO:0009966,GO:0009987,GO:0010244,GO:…
1	30497.c0.g1.i1	12.21	0.86	0	0.04	-2.99998	0.00036585	-7.07269	4.69e-05	2.82749	1					EFH42035.1	95.349	0	AT5G50150.1	94.33	0	NEP-interacting protein putative (DUF239)						GO:0000151,GO:0000152,GO:0003674,GO:0003824,GO:0004842,GO:0005488,GO:0005575,GO:0005680,GO:0005768,GO:0005769,GO:0005798,GO:0005886,GO:0006508,GO:0006511,GO:0006807,GO:0006950,GO:0006970,GO:0008150,GO:0008152,GO:0008270,GO:0009056,GO:0009057,GO:0009628,GO:0009987,GO:0010498,GO:0016020,GO:0016021,GO:0016740,GO:0019538,GO:0019787,GO:0019941,GO:0030100,GO:0030163,GO:0031224,GO:0031410,GO:0031461,GO:…
1	30499.c1.g1.i1	13.22	1.3	1.88	1.6	-2.37146	0.0056021	-0.0961615	1	0.0380232	1	NFYB2_ARATH	98.291	3.44e-83	Nuclear transcription factor Y subunit B-2	ESQ39916.1	98.291	1.65e-81	AT5G47640.1	98.291	4.75e-83	nuclear factor Y subunit B2				COG1252	ath:AT2G29990`KO:K17871	GO:0003674,GO:0003676,GO:0003677,GO:0005488,GO:0005575,GO:0005634,GO:0005773,GO:0006139,GO:0006351,GO:0006355,GO:0006725,GO:0006807,GO:0008150,GO:0008152,GO:0009058,GO:0009059,GO:0009889,GO:0009987,GO:0010468,GO:0010556,GO:0016070,GO:0018130,GO:0019219,GO:0019222,GO:0019438,GO:0031323,GO:0031326,GO:0032774,GO:0034641,GO:0034645,GO:0034654,GO:0043170,GO:0043226,GO:0043227,GO:0043229,GO:0043231,GO:…
1	30501.c0.g1.i2	18.04	1.58	5.07	3.98	-2.59907	0.000485935	1.02282	0.791871	-0.0797691	1	LHTL8_ARATH	99.023	0	Lysine histidine transporter-like 8	Q9SX98.1	99.023	0	AT1G47670.1	99.023	0	Transmembrane amino acid transporter family protein
1	30513.c0.g1.i2	294.81	39.61	100.06	67.54	-2.00135	0.0047645	0.72198	0.884347	-0.283676	1	AL2B4_ARATH	94.238	0	Aldehyde dehydrogenase family 2 member B4, mitochondrial	Q9SU63.1	94.238	0	AT3G48000.1	94.249	0	aldehyde dehydrogenase 2B4
1	30518.c0.g1.i2	7.84	0.94	5.59	2.94	-2.01653	0.0431372	1.92872	0.052497	-0.649716	1	AB3G_ARATH	96.849	0	ABC transporter G family member 3	Q9ZUU9.2	96.849	0	AT2G28070.2	96.854	0	ABC-2 type transporter family protein	PF08343.9
1	30519.c0.g2.i3	39.13	0.05	0.35	0.21	-8.4402	9.92e-14	1.97517	1	-0.492855	1	RRP31_ARATH	97.701	7.07e-66	30S ribosomal protein 3-1, chloroplastic	AAM63350.1	97.701	7.85e-64	AT1G68590.1	97.701	9.7e-66	Ribosomal protein PSRP-3/Ycf65				COG2940	ath:AT1G02580`KO:K11430	GO:0000149,GO:0003674,GO:0005215,GO:0005484,GO:0005488,GO:0005515,GO:0005575,GO:0006810,GO:0006886,GO:0006906,GO:0006996,GO:0008104,GO:0008150,GO:0008565,GO:0009987,GO:0012505,GO:0015031,GO:0015197,GO:0015833,GO:0016021,GO:0016043,GO:0016050,GO:0022406,GO:0022892,GO:0031201,GO:0031224,GO:0032991,GO:0033036,GO:0042886,GO:0043234,GO:0044424,GO:0044425,GO:0044444,GO:0044464,GO:0044699,GO:0044763,GO:…
1	30521.c0.g1.i2	375.78	172.5	5.6	4.95	-0.342799	1	-5.42413	1.19e-11	0.118954	1	NSP5_ARATH	91.131	0	Nitrile-specifier protein 5	EOA13709.1	91.131	0	AT5G48180.1	91.159	0	nitrile specifier protein 5				ENOG4111P6E	ath:AT1G20700
1	30522.c1.g1.i1	172.61	1.75	0.28	0.28	-5.81892	1.4e-08	-3.05465	0.0800002	0.260405	1	SWT12_ARATH	83.784	4.97e-85	Bidirectional sugar transporter SWEET12 {ECO:0000303|PubMed:21107422}	OAO89910.1	84.459	1.78e-83	AT5G23660.1	83.893	4.99e-85	bidirectional sugar transporter SWEET12-like protein
1	30522.c1.g2.i1	112.9	1.95	0	0.13	-4.98954	2.48e-08	-5.62396	0.0255264	2.01359	1	SWT12_ARATH	90.909	1.93e-75	Bidirectional sugar transporter SWEET12 {ECO:0000303|PubMed:21107422}	XP_010421173.1	90.083	1.73e-73	AT5G23660.1	90.909	2.65e-75	bidirectional sugar transporter SWEET12-like protein				COG0554	ath:AT1G80460`KO:K00864	GO:0003674,GO:0003824,GO:0008150,GO:0008152
1	30522.c2.g1.i4	59.78	8.84	0.11	0.19	-1.88637	0.134583	-6.795	1.81e-10	1.0144	1	SWT11_ARATH	91.259	0	Bidirectional sugar transporter SWEET11 {ECO:0000303|PubMed:21107422}	Q9SMM5.1	91.259	0	AT3G48740.1	91.259	0	Nodulin MtN3 family protein						GO:0003674,GO:0005215,GO:0005216,GO:0005253,GO:0005310,GO:0005342,GO:0005575,GO:0005773,GO:0005774,GO:0006810,GO:0006811,GO:0006820,GO:0006835,GO:0008150,GO:0008509,GO:0008514,GO:0009705,GO:0009987,GO:0010118,GO:0015075,GO:0015140,GO:0015267,GO:0015556,GO:0015711,GO:0015740,GO:0015743,GO:0015849,GO:0016020,GO:0016021,GO:0022803,GO:0022838,GO:0022857,GO:0022891,GO:0022892,GO:0031090,GO:0031224,GO:…
1	30524.c0.g1.i4	19.15	13.93	3.39	1.56	0.374941	1	-2.52872	0.00418974	-0.904019	1					AAO22806.1	83.01	9.77e-105	AT1G73210.3	83.01	9.94e-107	hypothetical protein (DUF789)				ENOG41105YW	ath:AT3G63210	GO:0000166,GO:0000902,GO:0003674,GO:0003824,GO:0005488,GO:0005515,GO:0005524,GO:0005575,GO:0005618,GO:0005739,GO:0005774,GO:0005975,GO:0006457,GO:0006950,GO:0006970,GO:0008150,GO:0008152,GO:0008270,GO:0009628,GO:0009651,GO:0009653,GO:0009719,GO:0009725,GO:0009735,GO:0009987,GO:0010033,GO:0010035,GO:0010038,GO:0016020,GO:0016043,GO:0016740,GO:0016772,GO:0016773,GO:0017076,GO:0030312,GO:0030554,GO:…
1	30529.c2.g2.i2	7.1	0	0	0	-5.97063	0.0493556	5.13e-15	1	0	1	DEF49_ARATH	42.353	2.75e-18	Defensin-like protein 49	XP_023637687.1	42.353	2.33e-16	AT5G19172.1	43.023	2.75e-18	Cysteine-rich protein				ENOG410ZCTV	ath:AT3G22160	GO:0003674,GO:0003824,GO:0004497,GO:0005488,GO:0005506,GO:0005575,GO:0008150,GO:0008152,GO:0009058,GO:0016020,GO:0016021,GO:0016491,GO:0016705,GO:0016709,GO:0019748,GO:0020037,GO:0031224,GO:0043167,GO:0043169,GO:0044425,GO:0044550,GO:0044699,GO:0044710,GO:0044711,GO:0046872,GO:0046906,GO:0046914,GO:0055114,GO:0097159,GO:1901363
1	30529.c2.g6.i3	78.92	0	0	0	-9.69079	1.61e-05	5.13e-15	1	0	1	DEF49_ARATH	52.381	2.07e-24	Defensin-like protein 49	Q2V366.1	52.381	3.46e-22	AT5G19172.1	52.941	2.07e-24	Cysteine-rich protein	PF13921.5			COG5083	ath:AT5G42870`KO:K15728
1	30529.c2.g8.i1	121.8	0	0	0	-10.2776	1.12e-08	5.13e-15	1	0	1	DEF48_ARATH	62.651	3.95e-31	Putative defensin-like protein 48	XP_010492971.1	64.198	1.14e-32	AT5G19175.1	63.095	3.95e-31	Cysteine-rich protein
1	30537.c2.g1.i4	6.67	0.21	2.36	2.65	-4.13199	0.00108093	2.94491	0.03191	0.434068	1					EFH47277.1	80.117	2.18e-72	AT5G03230.1	81.065	3.63e-73	senescence regulator (Protein of unknown function DUF584)			ExpAA=21.33^PredHel=1^Topology=i7-26o	ENOG410Y65V	ath:ArthMp102
1	30543.c1.g2.i1	4.88	0.11	0.43	0.3	-4.32332	0.00178639	1.31688	1	-0.275825	1	DOF54_ARATH	74.593	3.94e-123	Dof zinc finger protein DOF5.4	Q8LDR0.2	74.593	6.57e-121	AT5G60850.1	74.675	3.98e-123	OBF binding protein 4
1	30544.c0.g1.i2	26.27	6.06	0.14	0.08	-1.05135	1	-5.6833	0.000185689	-0.576283	1	PXG3_ARATH	93.122	6.21e-113	Probable peroxygenase 3	O22788.1	93.122	1.04e-110	AT2G33380.1	93.122	8.58e-113	Caleosin-related family protein	PF04949.12					GO:0000151,GO:0003674,GO:0003779,GO:0005488,GO:0005515,GO:0005575,GO:0005829,GO:0005856,GO:0005884,GO:0007015,GO:0008064,GO:0008092,GO:0008150,GO:0008154,GO:0008361,GO:0009987,GO:0010638,GO:0016043,GO:0022411,GO:0030042,GO:0030832,GO:0030834,GO:0030836,GO:0030863,GO:0030864,GO:0031461,GO:0032403,GO:0032535,GO:0032956,GO:0032970,GO:0032984,GO:0032991,GO:0033043,GO:0042643,GO:0043226,GO:0043228,GO:…
1	30546.c1.g1.i1	152.38	8.6	6.66	5.8	-3.22434	6.96e-07	-0.930784	0.827179	0.0227169	1	NDHS_ARATH	84.8	4.73e-143	NAD(P)H-quinone oxidoreductase subunit S, chloroplastic {ECO:0000305}	EOA18489.1	86	8.42e-142	AT4G23890.1	84.8	6.54e-143	NAD(P)H-quinone oxidoreductase subunit S						GO:0000975,GO:0000976,GO:0000977,GO:0000981,GO:0001012,GO:0001067,GO:0001071,GO:0001085,GO:0001228,GO:0003674,GO:0003676,GO:0003677,GO:0003682,GO:0003690,GO:0003700,GO:0005488,GO:0005515,GO:0005575,GO:0005634,GO:0005667,GO:0006355,GO:0008134,GO:0008150,GO:0008270,GO:0009889,GO:0009987,GO:0010468,GO:0010556,GO:0019219,GO:0019222,GO:0030154,GO:0031323,GO:0031326,GO:0032502,GO:0032991,GO:0043167,GO:…
1	30553.c0.g1.i1	23.63	2.45	0	0.02	-2.54012	0.0313256	-8.26449	3.78e-06	2.0135	1					XP_010421322.1	82.5	4.27e-77	AT5G24790.1	79.397	5.63e-74	transmembrane protein putative (Protein of unknown function DUF599)				COG2072	ath:AT5G43890`KO:K11816	GO:0001071,GO:0003674,GO:0003676,GO:0003677,GO:0003700,GO:0005488,GO:0005575,GO:0005634,GO:0006139,GO:0006351,GO:0006355,GO:0006725,GO:0006807,GO:0006950,GO:0007154,GO:0008150,GO:0008152,GO:0009058,GO:0009059,GO:0009267,GO:0009605,GO:0009889,GO:0009893,GO:0009987,GO:0009991,GO:0010468,GO:0010556,GO:0010604,GO:0010628,GO:0016036,GO:0016070,GO:0018130,GO:0019219,GO:0019222,GO:0019438,GO:0031323,GO:…
1	30562.c1.g1.i6	25.18	3.34	3.56	3.47	-1.98897	0.0155251	-0.526887	1	0.18213	1					EOA38461.1	88.75	7e-149	AT1G55140.1	86.667	3.28e-142	Ribonuclease III family protein
1	30569.c0.g1.i2	23.12	9.2	2.13	1.86	-0.441011	1	-2.60425	0.00341417	0.0521581	1					EFH43158.1	93.558	0	AT4G39955.1	91.793	0	alpha/beta-Hydrolases superfamily protein
1	30572.c0.g1.i1	43.06	3.64	3.98	6.78	-2.70237	0.000132684	-0.398216	1	1.02923	1	ORRM6_ARATH	72.193	1.43e-80	Organelle RRM domain-containing protein 6, chloroplastic {ECO:0000303|PubMed:28213559}	EFH65190.1	75.401	2.98e-82	AT1G73530.1	72.34	1.43e-80	RNA-binding (RRM/RBD/RNP motifs) family protein
1	30575.c0.g1.i4	22.27	0.92	0.03	0.2	-3.74657	2.48e-05	-4.7969	0.0181562	2.44569	1					XP_024009628.1	59.551	7.44e-36	AT3G45230.1	63.333	1e-30	hydroxyproline-rich glycoprotein family protein
1	30580.c1.g1.i5	28.1	4.97	7.18	5.12	-1.57916	0.033457	-0.0305281	1	-0.222385	1	SYVM1_ARATH	92.647	0	Valine--tRNA ligase, mitochondrial 1 {ECO:0000305}	EFH69077.1	93.824	0	AT1G14610.1	92.647	0	valyl-tRNA synthetase / valine-tRNA ligase (VALRS)	PF13812.5
1	30583.c0.g1.i5	19.64	1.03	1.55	0.72	-3.30934	3.57e-06	0.0424903	1	-0.866966	1	P5CR1_ARATH	95.652	0	Pyrroline-5-carboxylate reductase	EOA21317.1	96.014	0	AT5G14800.1	95.668	0	pyrroline-5- carboxylate (P5C) reductase
1	30593.c0.g1.i2	9.14	0.45	0.1	0.14	-3.32708	0.000347762	-2.52266	0.294575	0.637279	1					EFH50876.1	80.488	1.43e-36	AT4G10280.1	79.518	1.24e-37	RmlC-like cupins superfamily protein
1	30596.c0.g1.i5	75.5	25.83	0.21	0.3	-0.643478	1	-7.44907	9.94e-24	0.78271	1	AI5L1_ARATH	82.129	5.36e-149	ABSCISIC ACID-INSENSITIVE 5-like protein 1	EFH53600.1	81.749	3.6e-148	AT3G44460.1	82.129	7.41e-149	Basic-leucine zipper (bZIP) transcription factor family protein						GO:0001101,GO:0005575,GO:0005634,GO:0006950,GO:0007165,GO:0008150,GO:0009414,GO:0009415,GO:0009628,GO:0009719,GO:0009725,GO:0009737,GO:0009987,GO:0010033,GO:0010035,GO:0033993,GO:0042221,GO:0043226,GO:0043227,GO:0043229,GO:0043231,GO:0044424,GO:0044464,GO:0050789,GO:0050794,GO:0050896,GO:0065007,GO:0097305,GO:1901700
1	30608.c0.g2.i4	4.88	0.91	0.07	0.11	-1.45489	0.50957	-4.17973	5.22e-05	0.989277	1	VSR5_ARATH	84.975	0	Vacuolar-sorting receptor 5	XP_010509684.1	89.757	0	AT2G34940.1	84.975	0	VACUOLAR SORTING RECEPTOR 5	PF14223.5
1	30610.c0.g1.i3	28.64	12.9	4.64	3.63	-0.138218	1	-2.08757	0.0480739	-0.158885	1	SMR8_ARATH	72.727	3.07e-27	Cyclin-dependent protein kinase inhibitor SMR8 {ECO:0000303|PubMed:20706207, ECO:0000303|PubMed:24399300, ECO:0000303|PubMed:26546445}	Q9SAD3.1	72.727	5.12e-25	AT1G10690.1	72.727	4.21e-27	cyclin-dependent kinase inhibitor	PF00141.22
1	30612.c0.g1.i3	356.2	34.29	0.16	0.52	-2.65231	0.0155785	-7.88048	2.46e-10	1.67597	1					CDY48384.1	58.654	1.25e-37	AT2G41390.1	52.885	2.29e-30	Pollen Ole e 1 allergen and extensin family protein						GO:0000166,GO:0001882,GO:0001883,GO:0003674,GO:0003824,GO:0003933,GO:0003934,GO:0005488,GO:0005525,GO:0005575,GO:0005737,GO:0006082,GO:0006575,GO:0006725,GO:0006729,GO:0006732,GO:0006760,GO:0006793,GO:0006796,GO:0006807,GO:0008150,GO:0008152,GO:0008270,GO:0009058,GO:0009108,GO:0009396,GO:0009987,GO:0016053,GO:0016787,GO:0016810,GO:0016814,GO:0017076,GO:0018130,GO:0019001,GO:0019238,GO:0019438,GO:…
1	30623.c0.g1.i4	189.43	27.57	16.96	15.59	-1.93572	0.00749573	-1.23917	0.190016	0.107089	1	BAS1A_ARATH	97.887	2.59e-101	2-Cys peroxiredoxin BAS1, chloroplastic	EOA31232.1	99.296	2.97e-100	AT3G11630.1	97.902	2.49e-101	Thioredoxin superfamily protein			ExpAA=48.62^PredHel=2^Topology=i44-66o76-98i
1	30623.c0.g2.i1	78.93	6.59	14.74	10.29	-2.63587	0.00485389	0.582616	1	-0.318451	1	BAS1A_ARATH	100	3.1e-70	2-Cys peroxiredoxin BAS1, chloroplastic	XP_013732084.1	100	2.49e-68	AT3G11630.1	100	4.26e-70	Thioredoxin superfamily protein				COG0021
1	30628.c2.g1.i1	14.03	0.97	0.26	0.29	-2.92781	0.00197926	-2.28644	0.440181	0.511596	1	IQD1_ARATH	63.043	3.84e-52	Protein IQ-DOMAIN 1 {ECO:0000303|PubMed:15960618}	XP_010423782.1	83.621	5.04e-80	AT5G03040.3	81.197	6.41e-82	IQ-domain 2
1	30636.c0.g3.i1	15.43	9.5	0.56	0.73	0.136564	1	-4.51226	2.02e-07	0.597138	1					EOA13856.1	73.214	8.01e-137	AT5G53420.1	73.214	8.07e-136	CCT motif family protein
1	30642.c0.g1.i2	103.86	0.32	0	0	-7.2001	1.77e-08	-2.22454	1	0	1					EFH40597.1	87.097	7.95e-10	AT5G54530.1	83.871	5.72e-11	serine protease putative (Protein of unknown function DUF538)						GO:0003674,GO:0003824,GO:0004842,GO:0005488,GO:0005575,GO:0005634,GO:0005737,GO:0006464,GO:0006508,GO:0006511,GO:0006807,GO:0006950,GO:0006970,GO:0007165,GO:0008150,GO:0008152,GO:0009056,GO:0009057,GO:0009628,GO:0009651,GO:0009738,GO:0009755,GO:0009787,GO:0009789,GO:0009966,GO:0009967,GO:0009987,GO:0010498,GO:0010646,GO:0010647,GO:0016567,GO:0016740,GO:0019538,GO:0019787,GO:0019941,GO:0023051,GO:…
1	30642.c0.g4.i1	607.39	4.98	0.26	0.82	-6.09877	2.61e-11	-4.21882	0.0362945	1.54002	1					BAC42043.1	81	6.68e-44	AT5G54530.1	81	5.51e-46	serine protease putative (Protein of unknown function DUF538)	PF00917.25
1	30662.c0.g1.i1	33.48	3.72	2.58	2.55	-2.32313	0.00252208	-1.02285	0.847407	0.229004	1	SERB1_ARATH	95.506	0	Phosphoserine aminotransferase 1, chloroplastic	XP_006412081.2	97.004	0	AT4G35630.1	95.506	0	phosphoserine aminotransferase	PF00428.18
1	30663.c0.g2.i2	56.12	0.41	0	0	-6.01853	0.0141872	-2.02731	1	0	1	AP25_ORYSJ	55.882	1.58e-20	Aspartyl protease 25 {ECO:0000305}	EFH49550.1	97.222	4.12e-42	AT5G07030.1	95.89	7.49e-44	Eukaryotic aspartyl protease family protein
1	30663.c0.g3.i1	78.31	1.51	0	1.83	-4.4823	0.0268837	-2.02745	1	1.97715	1	AED3_ARATH	54.286	1.85e-19	Aspartyl protease AED3 {ECO:0000303|PubMed:24755512}	BAB11161.1	95.714	2.96e-39	AT5G07030.1	95.714	4.52e-41	Eukaryotic aspartyl protease family protein
1	30664.c1.g1.i3	19.85	0.95	0	0	-3.60232	0.00391441	-6.11305	0.0246123	0	1					EFH57187.1	76.522	3.74e-56	AT2G28410.1	73.276	2.63e-55	transmembrane protein						GO:0003674,GO:0003676,GO:0003824,GO:0003964,GO:0004175,GO:0004190,GO:0004518,GO:0004519,GO:0005488,GO:0006139,GO:0006259,GO:0006310,GO:0006725,GO:0006807,GO:0008150,GO:0008152,GO:0008233,GO:0009987,GO:0015074,GO:0016740,GO:0016772,GO:0016779,GO:0016787,GO:0016788,GO:0034061,GO:0034641,GO:0043167,GO:0043169,GO:0043170,GO:0044237,GO:0044238,GO:0044260,GO:0046483,GO:0046872,GO:0070001,GO:0070011,GO:…
1	30690.c0.g2.i1	22.5	12.85	4.14	2.23	0.0797564	1	-2.16342	0.00278205	-0.610553	1					XP_019094815.1	89.189	2.72e-162	AT1G57680.3	88.288	7.34e-164	plasminogen activator inhibitor
1	30693.c0.g1.i2	161.26	18.98	30.77	47.03	-2.28417	0.00237904	0.172826	1	0.911954	1	ALFC8_ARATH	98.131	8.9e-68	Fructose-bisphosphate aldolase 8, cytosolic {ECO:0000305}	OAP01291.1	93.103	2.54e-67	AT3G52930.1	98.131	1.22e-67	Aldolase superfamily protein				ENOG410XQN5	ath:AT5G47200`KO:K07874	GO:0005575,GO:0005911,GO:0009506,GO:0012505,GO:0030054,GO:0044464
1	30693.c0.g2.i6	16.19	0.81	1.75	1.34	-3.43159	7.57e-05	0.545693	1	-0.0855803	1	ALFC8_ARATH	91	5.08e-58	Fructose-bisphosphate aldolase 8, cytosolic {ECO:0000305}	CDY66283.1	92	1.57e-56	AT3G52930.1	91	6.95e-58	Aldolase superfamily protein
1	30695.c0.g1.i3	12.58	2.26	0	0.06	-1.60254	0.401638	-6.90994	0.0021103	2.01232	1					OAP03552.1	73.984	1.84e-56	AT3G61660.2	73.387	1.05e-56	hypothetical protein
1	30695.c0.g2.i2	17.74	0	0	0	-8.53541	2.35e-07	5.13e-15	1	0	1					OAP03552.1	78.689	2.61e-61	AT3G61660.2	77.236	1.17e-61	hypothetical protein				ENOG410XS6U	ath:AT1G07950`KO:K15139	GO:0005575,GO:0005576,GO:0006950,GO:0006952,GO:0008150,GO:0009607,GO:0050896
1	30699.c1.g1.i4	21.72	1.51	0.03	0.09	-2.97449	0.0158839	-5.89405	0.000941498	1.67426	1	IAMT1_ARATH	93.301	3.78e-134	Indole-3-acetate O-methyltransferase 1	EFH42342.1	95.694	2.72e-134	AT5G55250.2	93.333	1.5e-134	IAA carboxylmethyltransferase 1						GO:0000041,GO:0003674,GO:0005215,GO:0005575,GO:0005739,GO:0005743,GO:0006810,GO:0006811,GO:0006812,GO:0006828,GO:0006839,GO:0008150,GO:0010033,GO:0016020,GO:0016021,GO:0016530,GO:0019866,GO:0022857,GO:0030001,GO:0031090,GO:0031224,GO:0031966,GO:0042221,GO:0043226,GO:0043227,GO:0043229,GO:0043231,GO:0044422,GO:0044424,GO:0044425,GO:0044429,GO:0044444,GO:0044446,GO:0044464,GO:0050896,GO:0051179,GO:…
1	30707.c0.g1.i1	384.16	2.24	5.29	5.36	-6.44451	6.1e-14	0.59237	1	0.245104	1	H2A7_ARATH	92.143	1.6e-68	Probable histone H2A.7	XP_009131963.1	93.478	9.35e-70	AT5G59870.1	92.143	2.21e-68	histone H2A 6						GO:0003674,GO:0003824,GO:0005575,GO:0005618,GO:0005787,GO:0006465,GO:0006508,GO:0006518,GO:0006605,GO:0006807,GO:0006810,GO:0006886,GO:0008104,GO:0008150,GO:0008152,GO:0008233,GO:0009987,GO:0015031,GO:0015833,GO:0016020,GO:0016021,GO:0016485,GO:0016787,GO:0019538,GO:0030312,GO:0031090,GO:0031224,GO:0032991,GO:0033036,GO:0033365,GO:0034613,GO:0034641,GO:0042886,GO:0043170,GO:0043234,GO:0043603,GO:…
1	30707.c0.g2.i2	202.69	6.36	9.59	11.2	-4.0914	3.11e-09	0.0151888	1	0.453673	1	H2A7_ARATH	94.792	1.56e-46	Probable histone H2A.7	EFH42614.1	94.792	1.75e-44	AT5G59870.1	94.792	2.14e-46	histone H2A 6
1	30707.c0.g3.i1	30.36	2.04	7.9	8.79	-2.9281	0.000958723	1.33337	0.549236	0.38242	1	H2AXA_ARATH	95.238	2.07e-65	Probable histone H2AXa	O04848.1	95.238	3.45e-63	AT1G08880.1	95.276	2.08e-65	Histone superfamily protein				ENOG410ZND9	ath:AT4G18596
1	30710.c1.g4.i1	197.75	25.7	3.56	4.8	-1.9623	0.284238	-3.28206	0.00219632	0.640085	1	PIP15_ARATH	98.333	2.56e-82	Probable aquaporin PIP1-5	EOA17147.1	100	4.78e-81	AT4G23400.1	98.333	3.53e-82	plasma membrane intrinsic protein 1;5
1	30710.c1.g5.i1	52.68	6.39	5.88	4.69	-2.13637	0.0220896	-0.671429	1	-0.0691744	1	PIP28_ARATH	98.214	3.7e-45	Probable aquaporin PIP2-8	Q9ZVX8.1	98.214	4.82e-43	AT2G16850.1	98.214	3.83e-45	plasma membrane intrinsic protein 2;8
1	30710.c1.g6.i1	28.56	3.74	11.58	12.57	-2.03614	0.0169422	1.13356	0.528344	0.359912	1	PIP21_ARATH	95.47	0	Aquaporin PIP2-1	P43286.1	95.47	0	AT3G53420.2	95.486	0	plasma membrane intrinsic protein 2A
1	30710.c1.g8.i2	24.07	0.62	0	0.06	-4.46834	1.45e-05	-5.08638	0.200349	1.97664	1	PIP28_ARATH	97.059	2.64e-116	Probable aquaporin PIP2-8	Q9ZVX8.1	97.059	4.41e-114	AT2G16850.1	97.076	2.66e-116	plasma membrane intrinsic protein 2;8	PF02209.18			COG5190	ath:AT4G21670`KO:K18998
1	30710.c1.g9.i1	34.98	0.52	0.06	0	-5.13849	2.63e-10	-3.42864	0.027692	-2.54956	1	PIP13_ARATH	97.902	0	Aquaporin PIP1-3	CDY15165.1	94.444	0	AT1G01620.1	97.909	0	plasma membrane intrinsic protein 1C
1	30725.c0.g1.i1	7.21	0.54	1.02	0.8	-2.94509	0.00605882	0.359578	1	-0.0807521	1	COPD_ARATH	80	7.44e-12	Coatomer subunit delta	XP_009122542.1	85	1.48e-10	AT5G05010.2	80	9.94e-12	clathrin adaptor complexes medium subunit family protein	PF04043.14
1	30731.c0.g2.i1	88.62	7.87	6.63	8.08	-2.60417	0.00027153	-0.785569	1	0.557728	1	GMD2_ARATH	92.76	1.54e-149	GDP-mannose 4,6 dehydratase 2	EFH54049.1	93.151	1.98e-151	AT3G51160.1	92.76	2.13e-149	NAD(P)-binding Rossmann-fold superfamily protein	PF14223.5
1	30732.c0.g2.i6	22.38	0.03	0	0.08	-7.82984	1.93e-07	-2.02742	1	2.77815	1					XP_013679797.1	51.399	4.96e-60					PF06217.11					GO:0003674,GO:0003735,GO:0003824,GO:0005198,GO:0005575,GO:0005618,GO:0005794,GO:0005829,GO:0005840,GO:0005975,GO:0005996,GO:0006139,GO:0006725,GO:0006793,GO:0006807,GO:0006950,GO:0006970,GO:0007275,GO:0008150,GO:0008152,GO:0009058,GO:0009225,GO:0009555,GO:0009628,GO:0009651,GO:0009832,GO:0009987,GO:0010035,GO:0010038,GO:0016020,GO:0016043,GO:0016051,GO:0016853,GO:0016866,GO:0019321,GO:0019322,GO:…
1	30733.c1.g3.i3	12.37	8.34	0.58	0.81	0.273349	1	-4.34181	2.68e-06	0.710449	1	ORS1_ARATH	93.103	1.21e-11	Protein ORGAN SIZE RELATED 1	XP_024003966.1	96.552	4.87e-10	AT2G41230.1	93.103	1.66e-11	ORGAN SIZE-like protein
1	30737.c2.g1.i4	36.13	12.42	5.43	4.88	-0.587872	1	-1.75489	0.0279364	0.110952	1	MPU12_ARATH	95.238	1.87e-99	Mannose-P-dolichol utilization defect 1 protein homolog 2	XP_010455224.1	96.599	5.31e-98	AT4G07390.2	95.238	2.58e-99	Mannose-P-dolichol utilization defect 1 protein
1	30741.c0.g2.i3	15.38	1.76	0.13	0.09	-2.19584	0.00959082	-4.06002	0.000907151	-0.254174	1	HMGB7_ARATH	28.485	3.28e-08	High mobility group B protein 7	AAX55191.1	78.862	3.31e-62	AT5G05330.1	78.862	2.73e-64	HMG-box (high mobility group) DNA-binding family protein
1	30746.c0.g1.i9	54.75	8.49	3.35	3.24	-1.84286	0.0500931	-1.85596	0.0268977	0.216165	1	RS212_ARATH	88.525	1.38e-34	40S ribosomal protein S21-2	ESQ32727.1	93.443	9.56e-34	AT5G27700.1	88.525	1.9e-34	Ribosomal protein S21e				COG5434	ath:AT1G02790`KO:K01213
1	30746.c0.g3.i2	123.39	19.58	16.78	18.01	-1.78207	0.041062	-0.768664	0.99162	0.340816	1	RS212_ARATH	88.525	1.13e-35	40S ribosomal protein S21-2	ESQ32727.1	93.443	9.32e-35	AT5G27700.1	88.525	1.55e-35	Ribosomal protein S21e				COG0515	ath:AT4G18710`KO:K14502
1	30748.c0.g2.i2	34.83	28.7	13.3	8.97	0.594205	1	-1.6249	0.0200197	-0.281952	1	POT6_ARATH	92	0	Potassium transporter 6	EFH65024.1	94.389	0	AT1G70300.1	92.016	0	K+ uptake permease 6	PF10607.8
1	30753.c0.g1.i1	58.1	51.44	25.82	26.51	0.661209	1	-1.53907	0.0214891	0.284608	1	ERD2A_ARATH	34.014	3.1e-16	ER lumen protein-retaining receptor A	EOA31150.1	84.36	7.08e-120	AT3G25160.1	89.744	1.5e-121	ER lumen protein retaining receptor family protein
1	30754.c0.g2.i9	41.01	0	0	0	-9.12736	1.3e-06	5.13e-15	1	0	1																	GO:0003674,GO:0003824,GO:0004175,GO:0004252,GO:0005575,GO:0005576,GO:0008233,GO:0008236,GO:0016787,GO:0017171,GO:0070011
1	30754.c1.g1.i3	39.86	8.99	0	0	-1.23879	0.596744	-7.66375	3.06e-05	0	1					EOA29558.1	91.429	1.9e-62	AT3G10320.1	88.462	1.62e-61	Glycosyltransferase family 61 protein	PF01547.24					GO:0003674,GO:0003676,GO:0003723,GO:0005488,GO:0005575,GO:0005634,GO:0043226,GO:0043227,GO:0043229,GO:0043231,GO:0044424,GO:0044464,GO:0097159,GO:1901363
1	30755.c0.g2.i1	14.88	2.03	0.07	0.29	-1.98951	0.0252239	-4.85042	0.00154493	1.91096	1	PHL6_ARATH	82.828	1.1e-109	Myb family transcription factor PHL6 {ECO:0000305}	XP_010487043.1	86.082	1.07e-114	AT3G13040.3	82.828	1.51e-109	myb-like HTH transcriptional regulator family protein				COG0096	ath:AT2G19720`KO:K02957
1	30758.c0.g1.i6	13.38	0	0.1	0.05	-9.08349	7.64e-07	2.49023	1	-0.573273	1					EOA25235.1	40.678	5.01e-08										GO:0003674,GO:0003824,GO:0004149,GO:0005488,GO:0005575,GO:0005739,GO:0006082,GO:0006084,GO:0006099,GO:0006101,GO:0006520,GO:0006553,GO:0006554,GO:0006637,GO:0006732,GO:0006790,GO:0006793,GO:0006807,GO:0008150,GO:0008152,GO:0008270,GO:0009056,GO:0009063,GO:0009066,GO:0009068,GO:0009987,GO:0016020,GO:0016054,GO:0016417,GO:0016740,GO:0016746,GO:0016747,GO:0016748,GO:0016751,GO:0019474,GO:0019477,GO:…
1	30763.c0.g1.i2	25.39	1.72	1.47	0.51	-3.05978	1.93e-05	-0.71142	1	-1.26529	1	E139_ARATH	87.852	0	Glucan endo-1,3-beta-glucosidase 9	XP_010453760.1	90.414	0	AT5G58480.1	87.852	0	O-Glycosyl hydrolases family 17 protein
1	30769.c0.g1.i3	41.65	6.51	1.16	1.28	-1.82817	0.0123261	-2.97561	4.2e-05	0.386016	1	GDL46_ARATH	82.759	5.35e-118	GDSL esterase/lipase At2g38180	XP_010517107.1	83.254	2.15e-120	AT2G38180.1	82.759	7.38e-118	SGNH hydrolase-type esterase superfamily protein	PF07714.16
1	30774.c0.g1.i1	156.89	0.7	1.68	2.43	-6.85317	8.21e-19	0.63652	1	0.706641	1	CUT1C_ARATH	82.051	6.75e-85	Protein CURVATURE THYLAKOID 1C, chloroplastic	Q9M812.1	82.051	1.13e-82	AT1G52220.1	82.166	6.78e-85	CURVATURE THYLAKOID protein						GO:0003006,GO:0003674,GO:0005215,GO:0005575,GO:0005774,GO:0006725,GO:0006810,GO:0006855,GO:0008150,GO:0008152,GO:0008324,GO:0009058,GO:0009698,GO:0009699,GO:0009705,GO:0009812,GO:0009813,GO:0009987,GO:0010023,GO:0010162,GO:0010231,GO:0015075,GO:0015077,GO:0015078,GO:0015238,GO:0015291,GO:0015297,GO:0015298,GO:0015299,GO:0015893,GO:0016020,GO:0016021,GO:0018130,GO:0018958,GO:0019438,GO:0019748,GO:…
1	30777.c0.g1.i5	8.5	3.11	0.1	0	-0.63978	1	-5.27258	5.87e-07	-3.04976	1	GPDHC_ARATH	92.982	3.06e-111	Glycerol-3-phosphate dehydrogenase [NAD(+)] GPDHC1, cytosolic	XP_010505937.1	95.322	1.19e-112	AT2G41540.4	92.982	4.2e-111	6-phosphogluconate dehydrogenase family protein						GO:0000166,GO:0003006,GO:0003674,GO:0003824,GO:0004672,GO:0004674,GO:0005488,GO:0005524,GO:0005575,GO:0005886,GO:0006464,GO:0006468,GO:0006793,GO:0006796,GO:0006807,GO:0008150,GO:0008152,GO:0009888,GO:0009987,GO:0010065,GO:0010067,GO:0010087,GO:0016020,GO:0016021,GO:0016301,GO:0016310,GO:0016740,GO:0016772,GO:0016773,GO:0017076,GO:0019538,GO:0022414,GO:0030154,GO:0030554,GO:0031224,GO:0032502,GO:…
1	30780.c0.g3.i2	14.48	4.29	0.92	1.32	-0.845721	0.964962	-2.68053	0.00697953	0.752683	1	PPDEX_ARATH	52.532	1.54e-60	DeSI-like protein At4g17486	XP_010417284.1	80.085	8.26e-117	AT2G25190.1	80.085	4.91e-110	PPPDE putative thiol peptidase family protein
1	30789.c0.g1.i1	16.17	1.11	3.09	3.56	-2.78398	0.0162814	0.82185	1	0.461709	1					AAG13069.1	82.734	6.83e-137	AT1G75460.1	82.796	2.34e-139	ATP-dependent protease La (LON) domain protein
1	30794.c1.g2.i3	8.45	0.17	0.7	0.39	-4.49829	0.000104747	1.42908	1	-0.597923	1	Y3972_ARATH	96.396	4.13e-79	Uncharacterized protein At3g49720	EOA26111.1	96.396	5.01e-77	AT3G49720.3	96.396	5.62e-79	transmembrane protein	PF03547.17			COG1132	ath:AT3G28860`KO:K05658
1	30797.c2.g1.i2	12.32	1.35	0.28	0.33	-2.28893	0.00261451	-2.69988	0.00980747	0.453826	1	C3H33_ARATH	94.937	0	Zinc finger CCCH domain-containing protein 33	XP_006296584.2	93.987	0	AT3G02830.1	94.937	0	zinc finger protein 1
1	30801.c0.g1.i1	14.05	0.14	0.03	0.04	-5.76788	1.07e-08	-2.51932	0.34227	0.245967	1	Y2242_ARATH	89.319	0	Probable LRR receptor-like serine/threonine-protein kinase At2g24230	EFH56822.1	90.728	0	AT2G24230.1	89.332	0	Leucine-rich repeat protein kinase family protein	PF02655.13			ENOG410Z7Z7	ath:AT1G62590
1	30804.c0.g1.i7	202.77	4.86	10.15	8.06	-4.4178	4.29e-09	0.436454	1	-0.0850822	1	H32_WHEAT	99.265	5.1e-80	Histone H3.2	KGN66469.1	100	1.32e-78	AT5G65360.1	100	5.84e-80	Histone superfamily protein	PF01535.19
1	30804.c0.g2.i1	292.6	9.69	14.24	12.66	-3.93988	3.54e-06	-0.113043	1	0.107025	1	H32_LILLO	100	1.77e-32	Histone H3.2	XP_023514535.1	78.082	1.17e-32	AT5G65360.1	100	2.71e-32	Histone superfamily protein
1	30810.c0.g1.i3	16.29	0.1	0.02	0.04	-6.34421	2.37e-13	-2.56971	1	1.00576	1	LUP1_ARATH	86.25	0	Lupeol synthase 1	XP_020890436.1	85.868	0	AT1G78970.3	86.25	0	lupeol synthase 1				ENOG410XSQQ	ath:AT5G12370`KO:K19984	GO:0003674,GO:0005215,GO:0005575,GO:0005778,GO:0006810,GO:0006855,GO:0008150,GO:0015238,GO:0015291,GO:0015297,GO:0015893,GO:0016020,GO:0016021,GO:0022804,GO:0022857,GO:0031090,GO:0031224,GO:0031903,GO:0042579,GO:0043226,GO:0043227,GO:0043229,GO:0043231,GO:0044422,GO:0044424,GO:0044425,GO:0044438,GO:0044439,GO:0044444,GO:0044446,GO:0044464,GO:0044699,GO:0044765,GO:0051179,GO:0051234,GO:0055085,GO:…
1	30824.c0.g2.i1	64.05	3.41	3.28	3.94	-3.31325	5.14e-06	-0.66718	1	0.483512	1	HIP3_ARATH	82.022	1.31e-62	Heavy metal-associated isoprenylated plant protein 3 {ECO:0000303|PubMed:21072340, ECO:0000303|PubMed:23368984}	EFH42654.1	80.899	1.41e-60	AT5G60800.1	82.09	1.31e-62	Heavy metal transport/detoxification superfamily protein
1	30830.c2.g1.i3	8.83	2.78	0.64	0.64	-0.812885	1	-2.64715	0.00956479	0.298661	1												PF00168.29
1	30839.c1.g1.i14	13.57	1.05	3.3	2.16	-2.72282	0.000267047	1.05278	0.600893	-0.296537	1					XP_010504339.1	62.252	1.17e-43	AT3G55020.2	96.61	3.07e-39	Ypt/Rab-GAP domain of gyp1p superfamily protein	PF01985.20
1	30840.c0.g2.i1	22.62	4.83	0.94	0.96	-1.32751	0.244275	-2.81457	0.00255207	0.288156	1	AB17I_ARATH	93.077	1.19e-165	ABC transporter I family member 17	Q9C9W0.1	93.077	1.99e-163	AT1G67940.1	93.077	1.65e-165	non-intrinsic ABC protein 3	PF07727.13
1	30841.c1.g1.i11	9.85	0.89	2.24	0.96	-2.55998	0.024118	0.703321	1	-0.897568	1	FBD37_ARATH	58.333	5.83e-30	Putative FBD-associated F-box protein At5g56700	OAO93039.1	58.333	5.31e-28	AT5G56700.2	58.333	4.48e-30	FBD / Leucine Rich Repeat domains containing protein
1	30845.c0.g1.i3	113.97	5.3	0.88	0.93	-3.52587	4.89e-07	-3.06172	0.000736997	0.266795	1	CAR1_ARATH	83.436	1.86e-98	Protein C2-DOMAIN ABA-RELATED 1 {ECO:0000303|PubMed:25465408}	Q9FHP6.1	83.436	3.1e-96	AT5G37740.1	83.537	1.87e-98	Calcium-dependent lipid-binding (CaLB domain) family protein
1	30848.c1.g1.i3	63.01	4.74	19.19	17.62	-2.73305	0.00460045	1.33902	0.501363	0.126959	1	RK13_ARATH	92.135	1.39e-113	50S ribosomal protein L13, chloroplastic	XP_010472697.1	92.135	3.32e-113	AT1G78630.1	92.135	1.92e-113	Ribosomal protein L13 family protein
1	30849.c8.g1.i1	46.83	7.04	0.53	0.51	-1.83085	0.315255	-4.11641	0.00586	0.275887	1					XP_013604740.1	52	1.33e-17
1	30855.c0.g1.i1	114.42	20.02	0.73	1.35	-1.68231	0.330312	-5.16866	8.94e-06	1.16189	1					XP_010433811.1	96.429	4.14e-92	AT4G24130.1	95.035	6.97e-92	DUF538 family protein (Protein of unknown function DUF538)
1	30856.c1.g1.i4	14.89	2.21	2.16	2	-1.88056	0.00985562	-0.569387	1	0.188489	1	NAT12_ARATH	87.622	0	Nucleobase-ascorbate transporter 12	EOA26354.1	86.872	0	AT2G27810.4	86.508	0	nucleobase-ascorbate transporter 12				ENOG410Y7YA	ath:AT3G52430
1	30868.c0.g2.i4	476.31	33.1	19.06	13.66	-2.97064	1.13e-05	-1.28824	0.220084	-0.234228	1	EF1G1_ARATH	99	2.73e-65	Probable elongation factor 1-gamma 1	BAD94101.1	98	1.15e-64	AT1G57720.2	99.01	3.13e-65	Translation elongation factor EF1B gamma chain	PF08263.11
1	30879.c0.g1.i1	25.43	0.2	0.13	0.07	-6.11961	8.57e-15	-1.1519	1	-0.566149	1	FH9_ARATH	75.939	0	Formin-like protein 9	EFH40150.1	74.202	0	AT5G48360.1	75.939	0	Actin-binding FH2 (formin homology 2) family protein			ExpAA=51.33^PredHel=3^Topology=i13-35o70-92i104-126o	ENOG410ZRF1	ath:AT4G01100`KO:K14684	GO:0003674,GO:0003676,GO:0003677,GO:0003824,GO:0004803,GO:0005488,GO:0006139,GO:0006259,GO:0006310,GO:0006313,GO:0006725,GO:0006807,GO:0008150,GO:0008152,GO:0008270,GO:0009987,GO:0032196,GO:0034641,GO:0043167,GO:0043169,GO:0043170,GO:0044237,GO:0044238,GO:0044260,GO:0044699,GO:0044710,GO:0044763,GO:0046483,GO:0046872,GO:0046914,GO:0071704,GO:0090304,GO:0097159,GO:1901360,GO:1901363
1	30880.c0.g1.i1	30.3	4.79	7.54	7.13	-1.74456	0.0418036	0.103444	1	0.191165	1	RAA1C_ARATH	98.256	1.03e-114	Ras-related protein RABA1c	XP_010441673.1	98.837	3.83e-113	AT5G45750.1	98.266	1.04e-114	RAB GTPase homolog A1C	PF05176.13
1	30880.c2.g1.i1	76.18	13.57	25.11	33.01	-1.53953	0.036983	0.294587	1	0.635695	1	RAA1B_ARATH	89.524	1.48e-140	Ras-related protein RABA1b	Q39222.1	89.524	2.47e-138	AT1G16920.1	89.573	1.49e-140	RAB GTPase homolog A1B	PF00318.19
1	30881.c0.g1.i4	6.26	0.11	0.06	0.23	-4.81698	0.000675345	-1.11554	1	1.94407	1					KFK38830.1	86.567	7.26e-80	AT3G14760.1	85.185	4.89e-79	transmembrane protein
1	30887.c0.g1.i5	49.22	6.42	10.55	13.65	-2.0547	0.0142896	0.254487	1	0.599128	1					XP_010420283.1	96.809	2.14e-60	AT5G16060.1	92.553	6.49e-60	Cytochrome c oxidase biogenesis protein Cmc1-like protein
1	30887.c0.g2.i3	25.15	2.17	2.24	1.22	-2.58577	0.00340895	-0.529167	1	-0.640459	1					ESQ41591.1	93.684	3.45e-59	AT5G16060.1	90.625	1.89e-59	Cytochrome c oxidase biogenesis protein Cmc1-like protein
1	30905.c0.g1.i1	13.5	6.97	1.75	1.38	-0.129939	1	-2.46776	0.00338753	-0.102685	1					XP_002885750.2	96.035	0	AT2G04305.1	89.231	0	Magnesium transporter CorA-like family protein
1	30929.c0.g1.i1	12.9	0.15	0	0.07	-5.3993	3.27e-06	-2.90616	1	2.0135	1					EFH47156.1	83.66	3.06e-63	AT5G01790.1	81.935	1.74e-57	hypothetical protein	PF07002.15					GO:0003674,GO:0003824,GO:0005575,GO:0005773,GO:0005783,GO:0008150,GO:0008152,GO:0009058,GO:0016020,GO:0016787,GO:0016788,GO:0043226,GO:0043227,GO:0043229,GO:0043231,GO:0044424,GO:0044444,GO:0044464
1	30931.c1.g1.i4	10.71	1.45	0.25	0.32	-2.05976	0.0303521	-2.96168	0.00875638	0.548594	1	APA3_ARATH	85.564	0	Aspartic proteinase A3	EFH48952.1	86.614	0	AT4G04460.1	85.564	0	Saposin-like aspartyl protease family protein
1	30935.c0.g1.i1	13.66	1.15	2.67	1.12	-2.60218	0.00312408	0.584106	1	-0.981779	1					AEC09677.1	84.568	4.81e-96	AT2G39440.2	84.663	2.9e-98	ribonuclease H2 subunit C-like protein
1	30939.c0.g1.i7	95.86	0.36	0	0	-7.07952	5.01e-17	-4.06197	0.598438	0	1	PSAK_ARATH	78.289	1.09e-68	Photosystem I reaction center subunit psaK, chloroplastic	Q9SUI5.2	78.289	1.82e-66	AT1G30380.1	78.431	1.1e-68	photosystem I subunit K
1	30939.c0.g2.i1	381.02	2.35	0.64	0.14	-6.45877	1.19e-17	-2.2268	0.348906	-1.73351	1	PSAK_ARATH	100	8.32e-40	Photosystem I reaction center subunit psaK, chloroplastic	EOA36320.1	100	1.04e-37	AT1G30380.1	100	8.34e-40	photosystem I subunit K
1	30941.c0.g2.i1	154.57	64.67	25.62	20.28	-0.383255	1	-1.86661	0.00386385	-0.118472	1	PIN1_ARATH	97.479	4.02e-81	Peptidyl-prolyl cis-trans isomerase Pin1	EFH60364.1	98.319	3.72e-80	AT2G18040.1	97.5	2.94e-81	peptidylprolyl cis/trans isomerase NIMA-interacting 1				COG5077	ath:AT5G06600`KO:K11838
1	30948.c1.g1.i16	14.06	2.47	3.95	3.74	-1.60951	0.0387383	0.101891	1	0.156019	1	MYB88_ARATH	77.913	0	Transcription factor MYB88 {ECO:0000303|PubMed:9839469}	EOA23904.1	82.353	0	AT2G02820.2	77.966	0	myb domain protein 88
1	30949.c0.g1.i9	38.78	10.49	0.63	0.04	-1.07675	0.913025	-4.4585	0.000135793	-3.59993	0.575912	DTX56_ARATH	86.066	0	Protein DETOXIFICATION 56 {ECO:0000303|PubMed:11739388}	EOA16509.1	86.066	0	AT4G22790.1	86.066	0	MATE efflux family protein	PF05460.12					GO:0000139,GO:0003674,GO:0005215,GO:0005338,GO:0005457,GO:0005458,GO:0005575,GO:0005794,GO:0006810,GO:0008150,GO:0008643,GO:0015291,GO:0015297,GO:0015780,GO:0015783,GO:0015784,GO:0015931,GO:0015932,GO:0016020,GO:0016021,GO:0022804,GO:0022857,GO:0022891,GO:0022892,GO:0031090,GO:0031224,GO:0036079,GO:0036080,GO:0043226,GO:0043227,GO:0043229,GO:0043231,GO:0044422,GO:0044424,GO:0044425,GO:0044431,GO:…
1	30949.c0.g3.i1	111.48	29.49	12.95	10.39	-1.06316	0.426918	-1.71036	0.0384739	-0.114535	1	SMO11_ARATH	98.667	9.49e-47	Methylsterol monooxygenase 1-1	AAQ13424.1	98.667	1.23e-44	AT4G12110.1	98.684	9.49e-47	sterol-4alpha-methyl oxidase 1-1				ENOG4110559	ath:AT5G56320
1	30954.c0.g2.i13	48.11	8.16	2.11	2.24	-1.65011	0.0233914	-2.4781	0.00037881	0.292075	1	RAE1A_ARATH	94.527	1.15e-122	Ras-related protein RABE1a	EOA24728.1	95.522	9.56e-122	AT3G53610.3	94.527	1.59e-122	RAB GTPase homolog 8	PF00736.18
1	30962.c0.g1.i1	57.4	27.99	12.79	9.86	-0.128342	1	-1.67984	0.0147733	-0.157969	1	AOR_ARATH	90.649	0	NADPH-dependent alkenal/one oxidoreductase, chloroplastic {ECO:0000303|PubMed:21169366}	EFH69563.1	91.429	0	AT1G23740.1	90.649	0	Oxidoreductase zinc-binding dehydrogenase family protein
1	30964.c1.g1.i2	17.78	6.36	1.55	0.97	-0.652203	1	-2.4829	0.0113331	-0.46136	1					XP_010418359.1	92.437	4.81e-71	AT1G63420.1	86.885	1.39e-68	O-glucosyltransferase-like protein (DUF821)
1	30969.c0.g2.i2	87.09	14.41	20.37	20.49	-1.72061	0.0173334	-0.0134348	1	0.303103	1	RS102_ARATH	90.132	1.61e-66	40S ribosomal protein S10-2	CDY44470.1	76.879	4.96e-67	AT5G41520.1	90.132	2.21e-66	RNA binding Plectin/S10 domain-containing protein
1	30980.c0.g1.i1	15.54	1.82	1.62	1.45	-2.18531	0.00322748	-0.719036	1	0.16507	1	STT3B_ARATH	98.413	2.69e-81	Dolichyl-diphosphooligosaccharide--protein glycosyltransferase subunit STT3B	BAF01432.1	98.413	3.31e-83	AT1G34130.1	98.413	3.66e-81	staurosporin and temperature sensitive 3-like b
1	30989.c0.g1.i1	8.56	4.06	0	0	-0.254516	1	-8.9597	5.86e-06	0	1					XP_010432729.2	58.621	5.37e-155	AT4G32350.2	50.562	8.48e-122	Regulator of Vps4 activity in the MVB pathway protein						GO:0005575,GO:0005886,GO:0016020,GO:0016021,GO:0031224,GO:0044425,GO:0044464
1	30999.c2.g1.i5	37.17	18.91	8.79	7.88	-0.0913054	1	-1.65663	0.033863	0.0840315	1					CDY27607.1	91.045	7.43e-34	AT1G27350.1	98.361	9.67e-35	Ribosome associated membrane protein RAMP4		sigP:1^24^0.912^YES		ENOG410Z3NP	ath:AT2G13820	GO:0000166,GO:0003674,GO:0003824,GO:0005488,GO:0005575,GO:0009526,GO:0009941,GO:0016020,GO:0016021,GO:0016491,GO:0016614,GO:0031090,GO:0031224,GO:0031967,GO:0031969,GO:0031975,GO:0036094,GO:0042170,GO:0043167,GO:0043168,GO:0044422,GO:0044424,GO:0044425,GO:0044434,GO:0044435,GO:0044444,GO:0044446,GO:0044464,GO:0048037,GO:0050660,GO:0050662,GO:0097159,GO:1901265,GO:1901363
1	31001.c0.g4.i1	13.47	6.67	0.17	0.17	-0.271846	1	-5.18677	0.00873831	0.233552	1
1	31002.c3.g1.i1	18.56	0.33	0.36	0.38	-4.80109	1.17e-05	-0.51646	1	0.254726	1	CKS2_ARATH	95.89	5.36e-48	Cyclin-dependent kinases regulatory subunit 2	XP_006409813.2	91.765	8.17e-48	AT2G27970.1	95.89	7.37e-48	CDK-subunit 2						GO:0000139,GO:0000301,GO:0005575,GO:0006461,GO:0006810,GO:0006890,GO:0006891,GO:0006996,GO:0007030,GO:0008104,GO:0008150,GO:0009987,GO:0015031,GO:0015833,GO:0016020,GO:0016043,GO:0016192,GO:0017119,GO:0022607,GO:0031090,GO:0032991,GO:0033036,GO:0034622,GO:0042886,GO:0043234,GO:0043623,GO:0043933,GO:0044422,GO:0044424,GO:0044431,GO:0044444,GO:0044446,GO:0044464,GO:0045184,GO:0048193,GO:0048213,GO:…
1	31002.c3.g2.i1	151.95	15.74	22.72	30.23	-2.35267	0.000605519	-0.0159098	1	0.632032	1	CKS2_ARATH	100	6.65e-54	Cyclin-dependent kinases regulatory subunit 2	XP_006409813.2	96.471	9.19e-54	AT2G27970.1	100	9.14e-54	CDK-subunit 2
1	31002.c4.g2.i2	128.24	12.66	8.84	9.39	-2.43292	0.00291253	-1.04625	0.924017	0.295877	1	CKS1_ARATH	98.63	3.66e-48	Cyclin-dependent kinases regulatory subunit 1	XP_021278048.1	97.26	3.68e-46	AT2G27960.1	98.63	5.04e-48	cyclin-dependent kinase-subunit 1
1	31015.c1.g1.i1	13.82	1.07	0.55	0.37	-2.80719	0.0379119	-1.24942	1	-0.238467	1	RGA_ARATH	92.913	5.02e-82	DELLA protein RGA	XP_023638148.1	94.488	3.2e-81	AT2G01570.1	92.913	6.85e-82	GRAS family transcription factor family protein
1	31024.c3.g2.i3	82.36	9.37	11.5	13.17	-2.28725	0.0114519	-0.187176	1	0.403966	1	RL51_ARATH	100	6.12e-11	60S ribosomal protein L5-1	BAD94104.1	100	6.26e-10	AT3G25520.2	100	3.64e-11	ribosomal protein L5
1	31029.c0.g1.i1	10.36	0.29	0.19	0.23	-4.24951	6.7e-07	-1.11067	1	0.489669	1					XP_002882142.2	82.535	0	AT2G48030.1	80	0	DNAse I-like superfamily protein				COG1502	ath:AT3G16785`KO:K01115
1	31031.c0.g1.i1	40.71	5.74	3.61	5	-1.9744	0.00641579	-1.20524	0.349461	0.725994	1	BZR2_ARATH	83.871	1.62e-108	Protein BRASSINAZOLE-RESISTANT 2 {ECO:0000303|PubMed:11970900}	XP_006305153.2	85.944	3.46e-113	AT1G19350.3	83.871	1.8e-108	Brassinosteroid signaling positive regulator (BZR1) family protein
1	31032.c0.g1.i1	48.89	10.6	0	0.47	-1.31361	0.769496	-8.24613	5.5e-05	3.66918	1	LAML_ARATH	68.317	2.63e-49	Lamin-like protein	CDY43265.1	84.158	1.07e-59	AT3G01070.1	95.05	4.84e-61	early nodulin-like protein 16						GO:0001071,GO:0001763,GO:0003006,GO:0003674,GO:0003676,GO:0003677,GO:0003700,GO:0005488,GO:0005575,GO:0005634,GO:0006139,GO:0006351,GO:0006725,GO:0006807,GO:0008150,GO:0008152,GO:0009058,GO:0009059,GO:0009653,GO:0009987,GO:0010014,GO:0010072,GO:0010223,GO:0010346,GO:0016070,GO:0018130,GO:0019438,GO:0022414,GO:0022603,GO:0032501,GO:0032502,GO:0032774,GO:0034641,GO:0034645,GO:0034654,GO:0040034,GO:…
1	31037.c1.g1.i1	12.4	0	0.19	0.39	-8.80534	2.56e-07	2.98509	1	1.1742	1					XP_020875117.1	78.667	1.18e-62	AT4G28310.1	76.667	9.82e-61	microtubule-associated protein						GO:0000166,GO:0003674,GO:0003824,GO:0004672,GO:0004674,GO:0005488,GO:0005524,GO:0016301,GO:0016740,GO:0016772,GO:0016773,GO:0017076,GO:0030554,GO:0032553,GO:0032555,GO:0032559,GO:0035639,GO:0036094,GO:0043167,GO:0043168,GO:0097159,GO:0097367,GO:1901265,GO:1901363
1	31042.c0.g1.i1	74.62	11.99	0.33	0.16	-1.74815	0.0302667	-5.63597	1.28e-08	-0.624099	1	GASAA_ARATH	77.528	1.17e-33	Gibberellin-regulated protein 10	EOA14287.1	75	1.3e-32	AT5G59845.1	77.778	1.18e-33	Gibberellin-regulated family protein				COG5114	ath:AT3G07740`KO:K11314	GO:0003674,GO:0003824,GO:0004721,GO:0004725,GO:0005575,GO:0005829,GO:0006793,GO:0006796,GO:0006950,GO:0006952,GO:0006970,GO:0008138,GO:0008150,GO:0008152,GO:0009314,GO:0009411,GO:0009416,GO:0009628,GO:0009651,GO:0009987,GO:0010224,GO:0010225,GO:0016311,GO:0016787,GO:0016788,GO:0016791,GO:0017017,GO:0033549,GO:0042578,GO:0044237,GO:0044424,GO:0044444,GO:0044464,GO:0050896
1	31050.c0.g1.i7	19.15	2.62	5.06	3.79	-1.91098	0.0251873	0.336299	1	-0.166009	1	DUF7_ARATH	79.63	5.25e-118	DUF724 domain-containing protein 7 {ECO:0000305}	BAH20243.1	79.63	1.21e-119	AT3G62300.2	79.63	6.9e-118	agenet domain protein (DOMAIN OF UNKNOWN FUNCTION 724 7)
1	31056.c1.g1.i1	134.65	29.68	0.07	0.05	-1.24496	1	-9.05209	1.44e-09	-0.105392	1	SCP20_ARATH	85.944	0	Serine carboxypeptidase-like 20	Q8L7B2.2	85.944	0	AT4G12910.1	85.972	0	serine carboxypeptidase-like 20				COG0525	ath:AT5G16715`KO:K01873	GO:0005575,GO:0005739,GO:0005794,GO:0005886,GO:0006810,GO:0008104,GO:0008150,GO:0012506,GO:0015031,GO:0015833,GO:0016020,GO:0016021,GO:0030658,GO:0030659,GO:0031090,GO:0031224,GO:0033036,GO:0042886,GO:0043226,GO:0043227,GO:0043229,GO:0043231,GO:0044422,GO:0044424,GO:0044425,GO:0044433,GO:0044444,GO:0044446,GO:0044464,GO:0045184,GO:0051179,GO:0051234,GO:0071702,GO:0071705,GO:0098588,GO:0098805
1	31058.c0.g1.i3	7.77	0.47	0	0	-3.04338	0.00188442	-4.87234	0.165036	0	1					AAD31338.1	96.316	4.22e-125	AT1G10750.1	96.316	8.13e-126	carboxyl-terminal peptidase putative (DUF239)
1	31065.c0.g1.i4	47.13	6.57	0.38	0.61	-1.99016	0.0369968	-4.53199	4.13e-05	0.825709	1
1	31069.c3.g1.i1	6.86	0.03	0.15	0.03	-6.44339	0.000219297	1.61805	1	-1.73352	1					XP_010470431.1	91.111	5.48e-48	AT1G65295.1	83.333	7.87e-45	ubiquitin carboxyl-terminal hydrolase						GO:0000145,GO:0002237,GO:0002831,GO:0002833,GO:0005575,GO:0005634,GO:0005829,GO:0006810,GO:0006887,GO:0006950,GO:0006952,GO:0008150,GO:0009605,GO:0009607,GO:0009617,GO:0009620,GO:0009987,GO:0010033,GO:0012505,GO:0016020,GO:0016192,GO:0030139,GO:0031347,GO:0031349,GO:0031410,GO:0031982,GO:0032101,GO:0032103,GO:0032940,GO:0032991,GO:0042221,GO:0043207,GO:0043226,GO:0043227,GO:0043229,GO:0043231,GO:…
1	31069.c4.g1.i1	8.85	0	0	0	-5.72508	0.0451281	5.13e-15	1	0	1															COG5184	ath:AT5G63860	GO:0003674,GO:0005488,GO:0005515
1	31071.c0.g1.i3	12.78	0.73	0.79	0.29	-3.17686	0.000106157	-0.473669	1	-1.113	1	HHP2_ARATH	100	1.67e-08	Heptahelical transmembrane protein 2	AEE85818.1	76.786	7.07e-52	AT4G30845.1	76.786	5.84e-54	DNA-directed RNA polymerase subunit beta						GO:0000156,GO:0001071,GO:0001101,GO:0003674,GO:0003676,GO:0003677,GO:0003700,GO:0004871,GO:0005488,GO:0005575,GO:0005634,GO:0006139,GO:0006351,GO:0006725,GO:0006807,GO:0006950,GO:0007165,GO:0008150,GO:0008152,GO:0009058,GO:0009059,GO:0009414,GO:0009415,GO:0009628,GO:0009719,GO:0009725,GO:0009735,GO:0009736,GO:0009755,GO:0009889,GO:0009966,GO:0009987,GO:0010033,GO:0010035,GO:0010074,GO:0010075,GO:…
1	31079.c0.g1.i2	148.7	24.08	10.26	14.84	-1.76142	0.013119	-1.73126	0.0212742	0.792946	1	RIDA_ARATH	93.048	2.35e-112	Reactive Intermediate Deaminase A, chloroplastic {ECO:0000303|PubMed:25070638}	BAF01604.1	88.837	1.05e-116	AT3G20390.2	88.889	4.61e-119	endoribonuclease L-PSP family protein
1	31082.c1.g1.i3	13.21	1.67	4.18	2.34	-2.04584	0.043536	0.719157	1	-0.620432	1					XP_010457544.1	94.444	1.8e-12	AT1G04850.1	88.889	8.42e-14	ubiquitin-associated (UBA)/TS-N domain-containing protein
1	31088.c0.g4.i1	54.14	1.75	5.35	4.58	-4.04789	4.78e-07	1.09042	0.737793	0.0601777	1					EFH47867.1	91.579	5.92e-51	AT5G14230.2	92.708	2.68e-52	ankyrin				ENOG4111ADB	ath:AT5G18960
1	31095.c2.g1.i5	90.04	0.74	1.79	1.64	-6.0676	3.14e-13	0.714897	1	0.130267	1	NLTL5_ARATH	83.916	3.81e-65	Non-specific lipid-transfer protein-like protein At5g64080	EFH42852.1	87.324	3.09e-68	AT5G64080.1	83.916	5.25e-65	Bifunctional inhibitor/lipid-transfer protein/seed storage 2S albumin superfamily protein						GO:0000793,GO:0000796,GO:0000799,GO:0001671,GO:0003674,GO:0003682,GO:0005488,GO:0005515,GO:0005575,GO:0005694,GO:0005737,GO:0006323,GO:0006996,GO:0007076,GO:0008047,GO:0008150,GO:0009987,GO:0016043,GO:0019899,GO:0022402,GO:0030234,GO:0030261,GO:0032991,GO:0043226,GO:0043228,GO:0043229,GO:0043232,GO:0043234,GO:0044422,GO:0044424,GO:0044427,GO:0044428,GO:0044446,GO:0044454,GO:0044464,GO:0044547,GO:…
1	31101.c3.g2.i1	8.41	0.22	0.05	0.06	-4.27634	3.61e-06	-2.30833	1	0.227823	1	BH154_ARATH	82.353	4.15e-85	Transcription factor bHLH154	XP_010510164.1	87.013	1.95e-91	AT2G31730.2	82.468	4e-85	basic helix-loop-helix (bHLH) DNA-binding superfamily protein
1	31102.c0.g2.i2	24.47	0.04	0.04	0	-8.01641	4.19e-12	-0.308829	1	-1.77847	1	WOX5_ARATH	70.796	1.07e-47	WUSCHEL-related homeobox 5	Q8H1D2.1	70.796	1.38e-45	AT3G11260.1	70.796	1.15e-47	WUSCHEL related homeobox 5						GO:0003674,GO:0005215,GO:0005575,GO:0005774,GO:0008324,GO:0015075,GO:0016020,GO:0016021,GO:0022857,GO:0022891,GO:0022892,GO:0031090,GO:0031224,GO:0044422,GO:0044424,GO:0044425,GO:0044437,GO:0044444,GO:0044446,GO:0044464,GO:0098588,GO:0098805
1	31109.c0.g1.i4	7.25	1.74	0.16	0.04	-1.17607	0.866334	-3.83974	0.0143371	-1.37664	1					ESQ35769.1	71.025	2.56e-123	AT1G10790.1	67.616	1.59e-113	hydroxyproline-rich glycoprotein family protein
1	31120.c2.g2.i1	8.26	1	1.18	0.92	-2.15154	0.0264907	-0.314463	1	0.00072599	1	PI5K2_ARATH	79.812	2.93e-109	Phosphatidylinositol 4-phosphate 5-kinase 2	XP_019085046.1	80.645	2.3e-111	AT1G77740.2	79.812	4.01e-109	phosphatidylinositol-4-phosphate 5-kinase 2				COG5190	ath:AT5G58003`KO:K18999
1	31120.c2.g3.i3	9.18	1.6	0.36	0.35	-1.6299	0.151205	-2.63624	0.0191731	0.289192	1	PI5K1_ARATH	93.455	5.96e-157	Phosphatidylinositol 4-phosphate 5-kinase 1	EOA39737.1	96.183	3.37e-157	AT1G21980.1	93.455	8.18e-157	phosphatidylinositol-4-phosphate 5-kinase 1	PF14365.5
1	31125.c1.g1.i7	7.99	0.17	0.04	0.07	-4.57499	2.43e-06	-2.33317	1	1.02031	1	Y1648_ARATH	83.408	1.37e-113	Uncharacterized protein At1g66480	OAP15440.1	83.857	1.69e-111	AT1G66480.1	83.408	1.9e-113	plastid movement impaired 2				COG1061	ath:AT5G41360`KO:K10843
1	31137.c0.g5.i1	24.52	2.14	4.5	5.17	-2.64319	0.000148836	0.543945	1	0.468308	1	ARF1_BRARP	89.231	4.25e-31	ADP-ribosylation factor 1	XP_009382843.1	83.871	6.47e-40	AT2G24765.1	89.394	4.42e-31	ADP-ribosylation factor 3	PF07724.13
1	31142.c6.g1.i3	18.72	0.91	0.37	0.29	-3.43863	0.00261657	-1.58738	1	-0.105479	1
1	31144.c0.g1.i1	190.71	18.8	8.49	5.88	-2.54186	0.00394717	-1.64227	0.221717	-0.282295	1	ENPL_ARATH	89.474	8.27e-48	Endoplasmin homolog {ECO:0000305}	AAB63606.1	89.474	9.35e-49	AT4G24190.2	89.565	6e-48	Chaperone protein htpG family protein
1	31151.c0.g2.i6	19.13	3.39	3.95	4.1	-1.61778	0.0399387	-0.293413	1	0.276477	1
1	31161.c9.g2.i1	43.05	7.14	12.22	9.25	-1.75616	0.0387383	0.233003	1	-0.141261	1	GRF1_ARATH	86.943	4.12e-141	Growth-regulating factor 1	OAP07446.1	87.261	5.3e-139	AT2G22840.1	86.984	4.15e-141	growth-regulating factor 1
1	31165.c0.g1.i1	10.66	0.7	0.75	0.68	-2.87271	0.00234953	-0.49608	1	0.0469172	1	ASIL2_ARATH	38.144	2.41e-11	Trihelix transcription factor ASIL2 {ECO:0000305}	ANM66019.1	90.728	1.58e-96	AT3G54390.2	90.728	1.27e-98	sequence-specific DNA binding transcription factor
1	31168.c0.g1.i5	67.81	12.55	0.32	0.41	-1.54781	0.416167	-5.65658	2.98e-06	0.54477	1					CDY12496.1	82.576	2.87e-30	AT1G23040.3	78.03	4.23e-29	hydroxyproline-rich glycoprotein family protein	PF07730.12		ExpAA=26.66^PredHel=1^Topology=i12-34o	COG0631	ath:AT1G43900`KO:K17506	GO:0000271,GO:0003674,GO:0003824,GO:0004373,GO:0005575,GO:0005975,GO:0005976,GO:0005982,GO:0006073,GO:0008150,GO:0008152,GO:0008194,GO:0009011,GO:0009058,GO:0009059,GO:0009250,GO:0009507,GO:0009536,GO:0009569,GO:0009987,GO:0016051,GO:0016740,GO:0016757,GO:0016758,GO:0019252,GO:0033692,GO:0034637,GO:0034645,GO:0035251,GO:0043036,GO:0043170,GO:0043226,GO:0043227,GO:0043229,GO:0043231,GO:0044042,GO:…
1	31183.c0.g1.i3	44.04	6.3	28.48	29.88	-1.89378	0.00465122	1.60402	0.0225371	0.365829	1	NRL1_ARATH	78.763	0	Nitrilase 1	XP_010425847.1	82.258	0	AT3G44310.3	78.82	0	nitrilase 1
1	31191.c1.g4.i1	7.71	0.65	0.23	0.17	-2.53949	0.0283632	-2.01357	0.636954	-0.116692	1					OAP04241.1	81.07	2.79e-109	AT3G14172.3	81.07	5e-111	GPI-anchored adhesin-like protein
1	31191.c1.g5.i2	6.39	3.56	0.48	0.33	0.0464374	1	-3.2938	0.012008	-0.084894	1					BAB02982.1	83.616	6.73e-85	AT3G14172.3	83.616	1.74e-86	GPI-anchored adhesin-like protein
1	31197.c0.g1.i1	283.53	16.68	1.52	1.58	-3.29812	8.87e-06	-3.93539	3.78e-06	0.268123	1	WSCP_ARATH	42.763	3.08e-27	Cysteine protease inhibitor WSCP	XP_010414863.1	43.636	1.45e-32	AT1G72290.1	42.763	4.21e-27	Kunitz family trypsin and protease inhibitor protein
1	31200.c0.g1.i14	78.7	11.27	10.84	9.92	-1.97712	0.0152886	-0.57483	1	0.120065	1	RL211_ARATH	96.875	1.11e-36	60S ribosomal protein L21-1	EOA35819.1	100	7.1e-36	AT1G09690.1	96.875	1.52e-36	Translation protein SH3-like family protein
1	31204.c0.g1.i1	23.5	5.99	1.1	1.43	-1.05399	0.441884	-2.93464	0.000281116	0.626781	1	FLA15_ARATH	96.131	0	Fasciclin-like arabinogalactan protein 15	ANM63494.1	95.846	0	AT3G52370.2	95.846	0	FASCICLIN-like arabinogalactan protein 15 precursor
1	31206.c2.g1.i1	7.54	0.06	0	0	-5.8456	0.00991715	-2.01755	1	0	1					XP_019087871.1	76.087	3.96e-34	AT5G57760.1	82.278	1.09e-31	hypothetical protein						GO:0000166,GO:0003674,GO:0003824,GO:0004672,GO:0004674,GO:0004675,GO:0004871,GO:0004872,GO:0004888,GO:0005488,GO:0005524,GO:0005575,GO:0005886,GO:0006464,GO:0006468,GO:0006793,GO:0006796,GO:0006807,GO:0007165,GO:0007166,GO:0008150,GO:0008152,GO:0009742,GO:0009755,GO:0009987,GO:0016020,GO:0016301,GO:0016310,GO:0016740,GO:0016772,GO:0016773,GO:0017076,GO:0019199,GO:0019538,GO:0030554,GO:0032553,GO:…
1	31207.c2.g1.i3	10.43	1.79	0.06	0.14	-1.57432	0.483194	-4.77357	0.0172238	1.00238	1	ZPR4_ARATH	92	4.29e-08	Protein LITTLE ZIPPER 4 {ECO:0000303|PubMed:18055602}	XP_021639016.1	72.973	2.35e-07	AT3G52770.1	80	5.25e-07	binding protein
1	31214.c0.g1.i2	463.75	66.99	2.15	3.75	-1.98777	0.011287	-5.427	8.73e-13	1.01543	1	ACP2_ARATH	60	9.53e-24	Acyl carrier protein 2, chloroplastic	XP_006302863.2	66.667	2.69e-27	AT1G54580.1	60	1.31e-23	acyl carrier protein 2				ENOG410YHV1	ath:AT4G29230	GO:0000375,GO:0000377,GO:0000390,GO:0000398,GO:0003674,GO:0003676,GO:0003677,GO:0005488,GO:0005575,GO:0005681,GO:0005684,GO:0006139,GO:0006396,GO:0006397,GO:0006725,GO:0006807,GO:0008150,GO:0008152,GO:0008380,GO:0009987,GO:0016043,GO:0016070,GO:0016071,GO:0022411,GO:0030529,GO:0031974,GO:0031981,GO:0032984,GO:0032988,GO:0032991,GO:0034641,GO:0042752,GO:0043021,GO:0043170,GO:0043233,GO:0043933,GO:…
1	31214.c0.g2.i1	461.34	16.88	2.08	3.12	-3.88628	6e-08	-3.40999	0.00380765	0.710766	1	ACP3_ARATH	91.667	2.5e-22	Acyl carrier protein 3, chloroplastic	AAM63008.1	91.667	3.94e-20	AT1G54630.1	91.667	3.42e-22	acyl carrier protein 3
1	31216.c0.g1.i2	7.06	2.78	0.84	0.55	-0.404648	1	-2.25163	0.010734	-0.331675	1	DNJ19_ARATH	53.731	5.72e-13	DnaJ protein ERDJ3B	EOA31661.1	86.429	1.1e-85	AT5G16650.2	72.903	4.11e-74	Chaperone DnaJ-domain superfamily protein
1	31219.c1.g1.i4	9.81	0.22	0.09	0.08	-4.47459	0.000214025	-1.58397	1	0.201566	1	SUB_ARATH	96.522	2.06e-72	Protein STRUBBELIG	AAB65472.1	96.522	1.05e-71	AT1G11130.2	96.552	2.39e-73	Leucine-rich repeat protein kinase family protein				COG5648	ath:AT1G20696
1	31227.c2.g1.i2	22.86	11.45	0.96	1	-0.00656582	1	-4.05235	9.94e-08	0.31288	1	B561P_ARATH	82.673	0	Cytochrome b561 and DOMON domain-containing protein At5g35735	XP_010440763.1	85.149	0	AT5G35735.1	82.716	0	Auxin-responsive family protein
1	31229.c2.g1.i2	7.46	0.86	0.3	0.1	-2.22516	0.0206915	-1.98406	0.0932677	-1.39731	1	SD31_ARATH	85.308	0	G-type lectin S-receptor-like serine/threonine-protein kinase SD3-1	XP_010508652.1	85.072	0	AT2G41890.1	85.308	0	curculin-like (mannose-binding) lectin family protein / PAN domain-containing protein	PF00025.20			COG2801	ath:ArthMp070
1	31263.c2.g1.i3	12.31	0.69	0.62	1.2	-3.29978	0.00268409	-0.751356	1	1.21404	1	HNL_ARATH	90.909	1.84e-91	Alpha-hydroxynitrile lyase	XP_010422857.1	90.909	8.42e-90	AT5G10300.1	90.909	2.53e-91	methyl esterase 5
1	31266.c1.g1.i4	145.27	9.11	8.3	7.67	-3.04014	1.81e-05	-0.748916	1	0.108958	1	H4_SOYBN	100	4.85e-52	Histone H4	KQL25626.1	100	3.95e-50	AT5G59970.2	100	5.25e-52	Histone superfamily protein	PF01569.20
1	31266.c1.g2.i1	166	13.8	8.98	6.17	-2.66882	3.69e-05	-1.15968	0.675448	-0.300902	1	H4_SOYBN	100	1.25e-48	Histone H4	PON75956.1	100	1.02e-46	AT5G59970.2	100	1.25e-48	Histone superfamily protein
1	31266.c1.g4.i1	62.85	0.52	3.02	1.74	-5.85499	6.34e-08	1.81425	1	-0.562776	1	H4_SOYBN	100	1.96e-24	Histone H4	KZM84921.1	77.049	1.12e-23	AT1G07660.2	100	1.24e-24	Histone superfamily protein						GO:0003674,GO:0003676,GO:0003723,GO:0003824,GO:0004518,GO:0004519,GO:0005488,GO:0005575,GO:0005739,GO:0006139,GO:0006725,GO:0006807,GO:0008150,GO:0008152,GO:0009451,GO:0009507,GO:0009536,GO:0009987,GO:0016070,GO:0016787,GO:0016788,GO:0034641,GO:0043170,GO:0043226,GO:0043227,GO:0043229,GO:0043231,GO:0043412,GO:0044237,GO:0044238,GO:0044260,GO:0044424,GO:0044444,GO:0044464,GO:0046483,GO:0071704,GO:…
1	31267.c1.g3.i2	9.28	3.76	0.19	0.11	-0.43817	1	-4.5007	0.00100671	-0.579501	1					XP_010425333.1	94.444	3.88e-21	AT3G26440.5	97.143	1.37e-20	transmembrane protein putative (DUF707)			ExpAA=24.62^PredHel=1^Topology=i24-46o	COG2124	osa:4329726`KO:K21291
1	31284.c0.g1.i1	22.28	1.88	0.28	0.15	-2.70635	0.000111752	-3.22861	0.000160233	-0.615442	1	NPC6_ARATH	95.174	0	Non-specific phospholipase C6	Q8H965.1	95.174	0	AT3G48610.1	95.174	0	non-specific phospholipase C6	PF10250.8
1	31288.c0.g1.i1	203.76	31.67	2.5	4.81	-1.88207	0.0823171	-4.15426	1.77e-06	1.2627	1	DNJ11_ARATH	43.878	7.1e-20	Chaperone protein dnaJ 11, chloroplastic	EFH61219.1	89.809	7.79e-95	AT3G13310.1	86.709	2.05e-94	Chaperone DnaJ-domain superfamily protein
1	31291.c0.g3.i1	41.96	1.1	0	0	-4.01691	0.023863	-2.81762	1	0	1	IDD6_ARATH	72.549	5.82e-21	Protein indeterminate-domain 6, chloroplastic {ECO:0000303|PubMed:16784536}	XP_018510654.1	72.549	1.23e-19	AT1G14580.2	72.549	7.78e-21	C2H2-like zinc finger protein				COG4886	ath:AT4G16890
1	31306.c0.g3.i3	456.59	250.62	108.21	101.57	-0.0264291	1	-1.75478	0.0253616	0.139479	1	GSTF9_ARATH	86.585	3.34e-87	Glutathione S-transferase F9	KFK31252.1	89.024	4.73e-88	AT2G30860.1	86.667	3.37e-87	glutathione S-transferase PHI 9				ENOG410XQS8	ath:AT3G02060
1	31312.c0.g5.i2	13.62	0.72	0.56	0.55	-3.45265	0.000426454	-0.868814	1	0.214087	1	FB135_ARATH	91.084	0	F-box protein At3g07870	EFH58813.1	91.304	0	AT3G07870.1	91.084	0	F-box and associated interaction domains-containing protein				ENOG411040N	ath:AT3G09710	GO:0001071,GO:0003674,GO:0003676,GO:0003677,GO:0003700,GO:0005488,GO:0005575,GO:0005634,GO:0006139,GO:0006351,GO:0006355,GO:0006725,GO:0006807,GO:0008150,GO:0008152,GO:0009058,GO:0009059,GO:0009889,GO:0009987,GO:0010468,GO:0010556,GO:0016070,GO:0018130,GO:0019219,GO:0019222,GO:0019438,GO:0031323,GO:0031326,GO:0032774,GO:0034641,GO:0034645,GO:0034654,GO:0043167,GO:0043169,GO:0043170,GO:0043226,GO:…
1	31313.c0.g4.i3	17.44	1.11	0.65	0.11	-2.96621	0.0016295	-1.33523	1	-1.97719	1	DEF55_ARATH	55.319	4.6e-10	Putative defensin-like protein 55	CDY53344.1	51.02	1.08e-08	AT2G03931.1	55.319	6.28e-10	Defensin-like (DEFL) family protein
1	31331.c2.g2.i2	16.37	1.8	1.42	1.82	-2.34338	0.00913147	-0.860727	1	0.566643	1	RL212_ARATH	86.301	9.48e-27	60S ribosomal protein L21-2	ESQ29646.1	90.411	8.77e-25	AT1G57860.1	86.301	1.3e-26	Translation protein SH3-like family protein
1	31331.c2.g3.i1	5.64	0.08	0.07	0.09	-5.12454	6.31e-05	-0.800213	1	0.547504	1	FB251_ARATH	68.38	0	F-box protein At5g03970	EOA20699.1	73.969	0	AT5G03970.1	68.38	0	F-box associated ubiquitination effector family protein	PF00098.22		ExpAA=120.40^PredHel=5^Topology=o398-420i432-454o469-491i528-550o560-579i	COG1215	ath:AT4G24000	GO:0003674,GO:0005488,GO:0005515,GO:0005575,GO:0005737,GO:0005856,GO:0005929,GO:0031514,GO:0042995,GO:0043226,GO:0043228,GO:0043229,GO:0043232,GO:0044424,GO:0044464,GO:0120025
1	31331.c3.g1.i1	1101.06	158.76	123.26	141.14	-1.95948	0.0114453	-0.878687	0.724393	0.431505	1	RL211_ARATH	99.371	3.55e-115	60S ribosomal protein L21-1	ESQ29646.1	100	8.13e-114	AT1G09690.1	99.371	4.9e-115	Translation protein SH3-like family protein
1	31339.c0.g3.i1	9.88	1.46	1.09	0.86	-1.85011	0.0174628	-0.936083	0.763107	-0.082222	1	MP702_ARATH	94.424	1.23e-145	Microtubule-associated protein 70-2	ANM59913.1	94.424	6.96e-146	AT1G24764.2	94.444	4.21e-148	microtubule-associated proteins 70-2
1	31341.c1.g2.i2	31.96	1.8	1.12	0.86	-3.28393	1.26e-06	-1.17345	0.530276	-0.107138	1	SR43C_ARATH	82.065	0	Signal recognition particle 43 kDa protein, chloroplastic	EOA33811.1	79.167	0	AT2G47450.1	82.065	0	chloroplast signal recognition particle component (CAO)
1	31342.c2.g1.i3	13.25	1.39	0.02	0	-2.28235	0.473021	-5.71158	0.0227193	-1.77645	1	DLO1_ARATH	83.333	0	Protein DMR6-LIKE OXYGENASE 1 {ECO:0000303|PubMed:25376907}	XP_010437037.1	85.057	0	AT4G10500.1	83.333	0	2-oxoglutarate (2OG) and Fe(II)-dependent oxygenase superfamily protein						GO:0001071,GO:0003674,GO:0003676,GO:0003677,GO:0003700,GO:0005488,GO:0005575,GO:0005634,GO:0006139,GO:0006351,GO:0006355,GO:0006725,GO:0006807,GO:0008150,GO:0008152,GO:0009058,GO:0009059,GO:0009889,GO:0009891,GO:0009893,GO:0009987,GO:0010033,GO:0010200,GO:0010243,GO:0010468,GO:0010556,GO:0010557,GO:0010604,GO:0010628,GO:0016021,GO:0016070,GO:0018130,GO:0019219,GO:0019222,GO:0019438,GO:0031224,GO:…
1	31345.c1.g1.i1	6.41	1.18	0.05	0.18	-1.5675	0.274789	-4.93857	4.35e-05	2.09682	1	GXM3_ARATH	89.597	0	Glucuronoxylan 4-O-methyltransferase 3	XP_010499922.1	91.919	0	AT1G33800.1	89.632	0	glucuronoxylan 4-O-methyltransferase-like protein (DUF579)
1	31351.c0.g2.i6	15.39	1.31	1.85	2.54	-2.64397	0.000214465	-0.0315756	1	0.722521	1	AHL5_ARATH	80.712	3.8e-135	AT-hook motif nuclear-localized protein 5 {ECO:0000312|EMBL:FAA00276.1}	XP_020890194.1	80.415	1.02e-134	AT1G63470.1	80.769	3.83e-135	AT hook motif DNA-binding family protein
1	31359.c0.g1.i4	8.71	1.49	0	0.05	-1.49971	1	-6.69766	0.00204442	1.97693	1					AAL58895.1	82.828	2.41e-30	AT3G17120.5	82.828	1.98e-32	transmembrane protein				ENOG410Y41C	ath:AT1G79330	GO:0003674,GO:0003824,GO:0003860,GO:0005575,GO:0005739,GO:0008150,GO:0008152,GO:0016289,GO:0016787,GO:0016788,GO:0016790,GO:0043226,GO:0043227,GO:0043229,GO:0043231,GO:0044424,GO:0044444,GO:0044464
1	31366.c0.g1.i1	51.37	4.65	0.56	0.68	-2.5884	0.000373054	-3.49905	8.62e-05	0.409568	1	PPA1_SOLLC	52.941	3.21e-78	Acid phosphatase 1	EFH43678.1	89.868	2.68e-149	AT4G29260.1	88.106	3.28e-148	HAD superfamily subfamily IIIB acid phosphatase
1	31367.c3.g2.i4	25.93	2.18	0.58	0.54	-2.69487	4.62e-05	-2.42524	0.00231417	0.193453	1	MCAT_ARATH	91.011	6.18e-109	Mitochondrial carnitine/acylcarnitine carrier-like protein	OAO95225.1	91.573	3.11e-107	AT5G46800.3	91.061	4.61e-109	Mitochondrial substrate carrier family protein
1	31372.c0.g1.i1	66.08	4.22	0.3	0.37	-3.18884	0.00035227	-4.18835	0.000654927	0.475576	1					XP_010491425.1	75.824	2.5e-45	AT5G08050.1	75.956	3.99e-45	wiskott-aldrich syndrome family protein putative (DUF1118)	PF05180.11			COG1112	ath:AT5G47010`KO:K14326
1	31372.c0.g2.i3	10.18	0.64	0.33	0.16	-3.05848	0.00221103	-1.50608	1	-0.647251	1					XP_010491425.1	94.304	1.11e-48	AT5G08050.1	87.5	2.42e-47	wiskott-aldrich syndrome family protein putative (DUF1118)				COG0297	ath:AT1G32900`KO:K13679
1	31374.c0.g5.i3	77.64	7.18	4.58	5.98	-2.59281	0.00527446	-1.19311	0.350146	0.642271	1	R15A1_ARATH	100	2.46e-44	40S ribosomal protein S15a-1	KZV45533.1	100	3.13e-42	AT5G59850.1	100	1.67e-44	Ribosomal protein S8 family protein	PF05920.10		ExpAA=106.10^PredHel=5^Topology=o5-27i29-51o121-143i156-173o188-210i
1	31375.c0.g1.i2	11.6	0.18	0.07	0.11	-5.04879	5.97e-09	-1.71924	1	0.814025	1	KN4C_ARATH	38.655	1.75e-22	Kinesin-like protein KIN-4C {ECO:0000305}	XP_010450332.1	81.412	0	AT5G33300.1	81.132	0	chromosome-associated kinesin-like protein						GO:0003006,GO:0005575,GO:0005576,GO:0005773,GO:0005783,GO:0008150,GO:0010162,GO:0022414,GO:0022611,GO:0032501,GO:0032502,GO:0043226,GO:0043227,GO:0043229,GO:0043231,GO:0044424,GO:0044444,GO:0044464,GO:0044699,GO:0044702,GO:0044707,GO:0044767,GO:0048609
1	31376.c0.g1.i3	56.4	1.36	0.07	0.04	-4.60568	3.09e-07	-4.52795	0.000780439	-0.567852	1	ECI3_ARATH	89.035	5.1e-140	Enoyl-CoA delta isomerase 3 {ECO:0000305}	EOA17343.1	88.186	5.05e-141	AT4G14440.1	89.035	7.05e-140	3-hydroxyacyl-CoA dehydratase 1
1	31378.c6.g1.i12	18.92	3.17	4.21	3.34	-1.66909	0.042914	-0.133143	1	-0.106883	1	RBL19_ARATH	92.784	9.71e-51	Rhomboid-like protein 19 {ECO:0000303|PubMed:16895613}	EFH58821.1	95.876	1.33e-50	AT3G07950.1	92.784	1.33e-50	rhomboid protein-like protein
1	31385.c0.g1.i8	25.38	2.02	0.56	0.18	-2.82229	0.00357856	-2.42417	0.0386295	-1.32813	1	ATXR5_ARATH	92.655	1.93e-118	Histone-lysine N-methyltransferase ATXR5	XP_023636719.1	94.35	2.98e-119	AT5G09790.1	92.697	2.65e-119	TRITHORAX-RELATED PROTEIN 5
1	31386.c0.g1.i1	536.77	309.56	7.42	3.46	0.0487943	1	-5.83036	3.29e-11	-0.806576	1	RD19C_ARATH	89.812	0	Probable cysteine protease RD19C {ECO:0000305}	EFH46433.1	91.689	0	AT4G16190.1	89.84	0	Papain family cysteine protease				COG2335	ath:AT3G52370	GO:0001071,GO:0003674,GO:0003676,GO:0003677,GO:0003700,GO:0005488,GO:0005515,GO:0005575,GO:0005634,GO:0006139,GO:0006351,GO:0006355,GO:0006725,GO:0006778,GO:0006779,GO:0006783,GO:0006807,GO:0007165,GO:0008150,GO:0008152,GO:0009058,GO:0009059,GO:0009314,GO:0009416,GO:0009605,GO:0009606,GO:0009628,GO:0009629,GO:0009630,GO:0009639,GO:0009740,GO:0009755,GO:0009889,GO:0009959,GO:0009987,GO:0010017,GO:…
1	31388.c0.g1.i1	21.47	5.77	2.45	2.02	-0.951099	0.628141	-1.74704	0.0325944	-0.0215828	1					AAT41748.1	94.074	8.45e-92	AT2G14110.1	94.074	6.85e-94	Haloacid dehalogenase-like hydrolase (HAD) superfamily protein
1	31389.c1.g1.i1	33.55	0.75	0.09	0.14	-4.61035	5.47e-07	-3.25574	0.346082	0.755735	1					AAK17156.1	80.952	3.51e-37	AT2G44670.1	81.25	3.05e-39	senescence-associated family protein (DUF581)
1	31389.c1.g3.i1	13.17	0.98	0.41	0.4	-2.78117	0.0043428	-1.73143	0.853311	0.278868	1					AAK17156.1	90.244	1.62e-45	AT2G44670.1	90.361	9.76e-48	senescence-associated family protein (DUF581)	PF10551.8
1	31389.c1.g4.i2	33.03	2.72	0.15	0.39	-2.72358	0.000306012	-4.49427	0.00027546	1.42033	1					EOA29099.1	87.097	3.88e-43	AT2G44670.1	86.17	4.14e-44	senescence-associated family protein (DUF581)
1	31391.c1.g1.i1	81.2	13.75	21.07	18.52	-1.66154	0.0476078	0.0501164	1	0.0621547	1	AKR2A_ARATH	95.122	3.28e-48	Ankyrin repeat domain-containing protein 2A {ECO:0000303|PubMed:18193034}	XP_019089628.1	95.122	2.52e-46	AT4G35450.4	95.181	1.52e-48	ankyrin repeat-containing protein 2						GO:0003674,GO:0003824,GO:0005575,GO:0008150,GO:0008152,GO:0008194,GO:0016740,GO:0016757,GO:0016758,GO:0035251,GO:0043226,GO:0043227,GO:0043229,GO:0043231,GO:0044424,GO:0044464,GO:0046527,GO:0080043,GO:0080044
1	31394.c0.g2.i6	72.4	10.64	7.45	8.78	-1.9479	0.0213807	-1.0332	0.498834	0.51748	1	RS18_ARATH	98.649	4.92e-47	40S ribosomal protein S18	PNT37570.1	100	4.62e-45	AT4G09800.1	98.649	6.77e-47	S18 ribosomal protein
1	31397.c0.g5.i2	257.63	34.79	13.1	9.7	-2.08323	0.0113501	-1.90608	0.0301448	-0.198325	1	R18A2_ARATH	98.658	7.19e-109	60S ribosomal protein L18a-2	XP_013625249.1	98.658	6.71e-107	AT2G34480.1	98.667	5.68e-109	Ribosomal protein L18ae/LX family protein				COG0580	zma:541887`KO:K09872	GO:0003674,GO:0005215,GO:0005310,GO:0005342,GO:0005575,GO:0005618,GO:0005739,GO:0005743,GO:0005774,GO:0005911,GO:0006810,GO:0006811,GO:0006820,GO:0006835,GO:0006839,GO:0006842,GO:0008150,GO:0008509,GO:0008514,GO:0009506,GO:0009507,GO:0009526,GO:0009536,GO:0009941,GO:0015075,GO:0015140,GO:0015142,GO:0015291,GO:0015297,GO:0015301,GO:0015367,GO:0015556,GO:0015711,GO:0015849,GO:0016020,GO:0016021,GO:…
1	31400.c0.g1.i3	69.06	1.15	1.16	0.87	-4.98702	1.45e-09	-0.534242	1	-0.197495	1	TL19_ARATH	89.474	3.08e-123	Thylakoid lumenal 19 kDa protein, chloroplastic	XP_010512784.1	93.421	1.06e-129	AT3G63540.1	92.754	1.57e-93	thylakoid lumenal protein (Mog1/PsbP/DUF1795-like photosystem II reaction center PsbP family protein)				ENOG410XQ85	ath:AT3G61710`KO:K08334
1	31403.c0.g1.i1	12.47	0.04	0.04	0.04	-7.15878	8.33e-10	-0.299874	1	0.201261	1					XP_013722531.1	85.95	3.4e-42	AT5G06270.2	85.246	8.46e-35	hypothetical protein						GO:0000323,GO:0000325,GO:0002376,GO:0003006,GO:0003674,GO:0003824,GO:0004175,GO:0004197,GO:0005575,GO:0005615,GO:0005618,GO:0005764,GO:0005773,GO:0005783,GO:0006508,GO:0006807,GO:0006950,GO:0006952,GO:0006955,GO:0007275,GO:0008150,GO:0008152,GO:0008219,GO:0008233,GO:0008234,GO:0009505,GO:0009555,GO:0009605,GO:0009607,GO:0009620,GO:0009626,GO:0009987,GO:0010623,GO:0012501,GO:0016787,GO:0019538,GO:…
1	31403.c0.g2.i6	14.57	8.26	1.93	2.93	-0.00140066	1	-2.60376	0.00141278	0.961744	1					ESQ40548.1	88.119	8.4e-42	AT5G06270.2	86.139	5.73e-40	hypothetical protein
1	31404.c0.g1.i4	100.11	13.38	4.52	6.03	-2.07075	0.0128161	-1.99892	0.128112	0.584878	1	DEF01_ARATH	84.615	1.9e-42	Defensin-like protein 1	XP_020881110.1	88.462	1.17e-41	AT2G02130.1	84.81	3.54e-43	low-molecular-weight cysteine-rich 68
1	31404.c0.g2.i5	323.13	17.99	5.32	9.77	-3.31217	4.15e-06	-2.28479	0.00134103	1.09344	1	DEF02_ARATH	86.111	4.04e-15	Defensin-like protein 2	EOA25034.1	97.222	4.11e-15	AT2G02100.1	86.111	5.54e-15	low-molecular-weight cysteine-rich 69
1	31404.c0.g3.i2	123.68	3.88	4.35	5.79	-4.1618	4.74e-09	-0.33341	1	0.588755	1	DEF01_ARATH	72.368	2.15e-32	Defensin-like protein 1	XP_013690468.1	69.737	3.73e-31	AT2G02130.1	72.727	9.32e-33	low-molecular-weight cysteine-rich 68
1	31414.c1.g2.i1	137.04	8.52	3.09	3.67	-3.23184	2.69e-05	-1.93758	0.0377396	0.554026	1	ACP5_ARATH	56.14	1.3e-39	Acyl carrier protein 5, chloroplastic	XP_002874402.2	58.772	3.67e-41	AT5G27200.1	56.14	1.58e-39	acyl carrier protein 5						GO:0003674,GO:0003824,GO:0004128,GO:0005488,GO:0005507,GO:0005575,GO:0005618,GO:0005739,GO:0005758,GO:0005794,GO:0006950,GO:0006970,GO:0008150,GO:0008152,GO:0009505,GO:0009628,GO:0009651,GO:0016491,GO:0016651,GO:0016653,GO:0030312,GO:0031970,GO:0031974,GO:0043167,GO:0043169,GO:0043226,GO:0043227,GO:0043229,GO:0043231,GO:0043233,GO:0044422,GO:0044424,GO:0044429,GO:0044444,GO:0044446,GO:0044464,GO:…
1	31418.c0.g1.i5	23.68	1.8	7.29	6.93	-2.82862	0.000874395	1.50283	0.258794	0.244255	1	XB32_ORYSJ	27.907	3.31e-13	Probable E3 ubiquitin-protein ligase XBOS32	XP_020878247.1	88.262	0	AT5G14230.1	88.713	0	ankyrin
1	31436.c0.g1.i1	29.13	8.39	0.84	1.07	-0.944956	0.913569	-3.65147	0.00655846	0.445126	1	FLA18_ARATH	91.026	3.01e-73	Fasciclin-like arabinogalactan protein 18	EOA30537.1	98.065	3.49e-73	AT3G11700.1	91.026	4.12e-73	FASCICLIN-like arabinogalactan protein 18 precursor
1	31440.c0.g1.i4	42.93	4.15	7.02	10.22	-2.46894	0.00375031	0.17285	1	0.806934	1	HA22D_ARATH	87.023	1.56e-66	HVA22-like protein d	Q9S760.1	87.023	2.61e-64	AT4G24960.1	87.023	2.15e-66	HVA22 homologue D
1	31441.c0.g1.i1	34.12	13.52	2.45	4.25	-0.403489	1	-2.97943	0.0449951	1.02408	1								AT4G25300.1	87.5	5.43e-08	2-oxoglutarate (2OG) and Fe(II)-dependent oxygenase superfamily protein
1	31441.c1.g2.i2	8.16	0.9	0.85	0.44	-2.33509	0.0401878	-0.566121	1	-0.775337	1	PMEI7_ARATH	88.06	6.79e-116	Pectinesterase inhibitor 7 {ECO:0000305}	OAO98336.1	88.557	1.8e-114	AT4G25260.1	88.119	6.82e-116	Plant invertase/pectin methylesterase inhibitor superfamily protein	PF04376.12
1	31445.c1.g1.i2	68.08	18.83	6.69	5.15	-1.02348	0.524475	-1.95776	0.0322507	-0.147651	1	NFD2_ARATH	83.766	1.67e-74	Protein NUCLEAR FUSION DEFECTIVE 2 {ECO:0000303|PubMed:16698901}	EOA38579.1	87.333	4.65e-76	AT1G24450.1	83.766	2.31e-74	Ribonuclease III family protein
1	31455.c1.g1.i2	52.88	5.82	28.51	28.2	-2.18473	0.00421223	1.69699	0.0440198	0.273136	1	HSP80_SOLLC	97.222	9.39e-67	Heat shock cognate protein 80	AFK35835.1	93.519	4.61e-68	AT5G56030.1	96.296	6.58e-66	heat shock protein 81-2	PF00133.21
1	31458.c2.g1.i5	14.3	1.27	0.72	0.31	-2.63152	0.000703697	-1.31104	0.774809	-0.917413	1					KFK27349.1	78.333	3.66e-120	AT5G58200.1	83.333	3.17e-122	Calcineurin-like metallo-phosphoesterase superfamily protein	PF00307.30
1	31460.c0.g1.i8	29.73	19.29	1.25	1.92	0.209208	1	-4.46805	4.45e-09	0.802976	1	BGL38_ARATH	73.429	0	Myrosinase 1	EFH50550.1	75.143	0	AT5G26000.1	73.504	0	thioglucoside glucohydrolase 1				COG0515	ath:AT3G23750
1	31460.c0.g4.i1	52.6	7.85	0.08	0	-1.92589	0.0778888	-6.55378	3.7e-09	-1.7785	1	BGL37_ARATH	72.321	8.22e-48	Myrosinase 2	AAV71147.1	73.984	9.6e-59	AT5G25980.2	72.321	1.11e-47	glucoside glucohydrolase 2						GO:0000975,GO:0000976,GO:0000977,GO:0001012,GO:0001067,GO:0001071,GO:0001101,GO:0003674,GO:0003676,GO:0003677,GO:0003690,GO:0003700,GO:0005488,GO:0005575,GO:0005634,GO:0006139,GO:0006351,GO:0006725,GO:0006807,GO:0007165,GO:0007602,GO:0008150,GO:0008152,GO:0009058,GO:0009059,GO:0009314,GO:0009411,GO:0009416,GO:0009581,GO:0009582,GO:0009583,GO:0009585,GO:0009605,GO:0009606,GO:0009628,GO:0009629,GO:…
1	31460.c0.g6.i1	26.22	5.41	0	0	-1.47174	0.338893	-8.20285	4.67e-08	0	1	BGL37_ARATH	74.766	1.41e-117	Myrosinase 2	OAO91400.1	81.221	1.17e-129	AT5G25980.3	74.766	1.32e-118	glucoside glucohydrolase 2						GO:0000166,GO:0000325,GO:0002020,GO:0003674,GO:0003824,GO:0005215,GO:0005488,GO:0005515,GO:0005524,GO:0005575,GO:0005576,GO:0005618,GO:0005773,GO:0005774,GO:0005794,GO:0005886,GO:0005911,GO:0006139,GO:0006163,GO:0006725,GO:0006753,GO:0006793,GO:0006796,GO:0006807,GO:0006810,GO:0006811,GO:0006812,GO:0006818,GO:0006950,GO:0006970,GO:0006996,GO:0007030,GO:0007275,GO:0008150,GO:0008152,GO:0008324,GO:…
1	31471.c0.g1.i2	14.78	1.11	1.11	1.32	-2.74889	0.00652878	-0.690293	1	0.465304	1	AGP1_ARATH	42.105	1.09e-08	Classical arabinogalactan protein 1	CDY44800.1	59.091	2.23e-18	AT5G64310.1	42.105	1.49e-08	arabinogalactan protein 1
1	31473.c0.g1.i1	81.51	20.29	5.81	5.98	-1.13996	0.46547	-2.33658	0.00547699	0.28905	1
1	31474.c0.g2.i1	333.54	22.01	31.5	51.62	-2.99442	5.25e-06	-0.0659032	1	0.947531	1												PF16913.4			COG5536	ath:AT4G24490`KO:K14050
1	31475.c3.g1.i2	27.42	0.61	0.24	0.24	-4.27696	0.0158336	-1.61661	1	0.201589	1					XP_010419855.1	92.437	5.55e-70	AT5G12960.1	81.513	4.3e-62	proline-tRNA ligase (DUF1680)
1	31476.c0.g1.i2	29.97	3.98	2.07	2.92	-2.03623	0.00756101	-1.4624	0.251253	0.690035	1	CNIH1_ARATH	93.836	5.88e-83	Protein cornichon homolog 1	Q9C7D7.1	93.836	9.81e-81	AT3G12180.1	93.878	4.7e-83	Cornichon family protein	PF04989.11
1	31480.c1.g6.i1	53.18	15.04	0	0	-1.02265	0.99776	-8.65031	2.43e-08	0	1	MES19_ARATH	76.19	4.46e-48	Putative methylesterase 19	XP_023640695.1	82.54	5.31e-49	AT2G23570.1	76.19	7.37e-48	methyl esterase 19				ENOG41113M5	ath:AT4G02000	GO:0000166,GO:0003674,GO:0003824,GO:0004672,GO:0004674,GO:0004693,GO:0005488,GO:0005524,GO:0005575,GO:0005634,GO:0006464,GO:0006468,GO:0006793,GO:0006796,GO:0006807,GO:0008150,GO:0008152,GO:0009987,GO:0016301,GO:0016310,GO:0016740,GO:0016772,GO:0016773,GO:0017076,GO:0019538,GO:0030554,GO:0032553,GO:0032555,GO:0032559,GO:0035639,GO:0036094,GO:0036211,GO:0043167,GO:0043168,GO:0043170,GO:0043226,GO:…
1	31481.c0.g1.i2	155.97	79.07	26.85	8.77	0.0555235	1	-2.14757	0.0233848	-1.42384	1	SBT17_ARATH	95.765	0	Subtilisin-like protease SBT1.7 {ECO:0000303|PubMed:16193095}	CAA59963.1	96.091	0	AT5G67360.1	95.779	0	Subtilase family protein
1	31481.c0.g2.i2	12.23	0.13	0	0	-5.50619	1.91e-07	-3.82155	0.868538	0	1	SBT17_ARATH	86.684	0	Subtilisin-like protease SBT1.7 {ECO:0000303|PubMed:16193095}	OAO92765.1	86.684	0	AT5G67360.1	86.684	0	Subtilase family protein
1	31484.c0.g1.i1	20.46	4.13	1.86	1.1	-1.37116	0.119954	-1.6696	0.0346249	-0.479492	1	MGAT2_ARATH	90.93	0	Alpha-1,6-mannosyl-glycoprotein 2-beta-N-acetylglucosaminyltransferase {ECO:0000305}	EFH59945.1	92.791	0	AT2G05320.1	90.951	0	beta-12-N-acetylglucosaminyltransferase II
1	31486.c0.g2.i1	38.78	6.37	6.59	6.21	-1.73687	0.0207148	-0.489425	1	0.162535	1	ARF2_ORYSJ	78.621	3.92e-74	ADP-ribosylation factor 2	KZN06245.1	73.885	9.13e-74	AT3G62290.3	79.452	1.45e-74	ADP-ribosylation factor A1E	PF07690.15
1	31487.c4.g1.i3	301.01	47.36	0.85	1.22	-1.84711	0.0179893	-6.22951	1.08e-14	0.722807	1	SYIC_ARATH	82.353	6.81e-12	Isoleucine--tRNA ligase, cytoplasmic {ECO:0000305}	EFH48762.1	88.764	1.97e-32	AT4G10270.1	83.516	1.19e-31	Wound-responsive family protein	PF08263.11					GO:0003674,GO:0005215,GO:0005575,GO:0006810,GO:0006811,GO:0006812,GO:0006813,GO:0008150,GO:0008324,GO:0015075,GO:0015077,GO:0015078,GO:0015291,GO:0015297,GO:0015298,GO:0015299,GO:0015672,GO:0016020,GO:0016021,GO:0022804,GO:0022857,GO:0022890,GO:0022891,GO:0022892,GO:0030001,GO:0031224,GO:0044425,GO:0051179,GO:0051234,GO:0055085
1	31487.c4.g2.i5	352.57	33.25	2.8	2.98	-2.58118	0.00875141	-4.03462	1.07e-06	0.299015	1					EFH48762.1	86.517	6.64e-34	AT4G10270.1	84.615	1.2e-30	Wound-responsive family protein
1	31488.c1.g1.i3	9.91	7.02	0.07	0.06	0.406658	1	-6.81737	4.15e-07	0.263586	1					EOA27696.1	84.926	9.16e-158	AT2G41380.1	84.559	4.07e-158	S-adenosyl-L-methionine-dependent methyltransferases superfamily protein				COG3104	ath:AT1G68570	GO:0002097,GO:0002100,GO:0003674,GO:0003824,GO:0004000,GO:0005488,GO:0006139,GO:0006396,GO:0006399,GO:0006400,GO:0006725,GO:0006807,GO:0008033,GO:0008150,GO:0008152,GO:0008251,GO:0008270,GO:0009451,GO:0009987,GO:0016070,GO:0016787,GO:0016810,GO:0016814,GO:0019239,GO:0034470,GO:0034641,GO:0034660,GO:0043167,GO:0043169,GO:0043170,GO:0043412,GO:0044237,GO:0044238,GO:0044260,GO:0046483,GO:0046872,GO:…
1	31492.c0.g1.i1	11.93	0.41	0	0	-3.85347	4.05e-05	-4.71455	0.234122	0	1	CML11_ARATH	96.429	2.68e-95	Calmodulin-like protein 11	CDY40824.1	91.195	2.87e-94	AT3G22930.1	96.429	3.7e-95	calmodulin-like 11				ENOG410ZHAF	ath:AT4G33630
1	31492.c1.g5.i2	53.56	9	14.88	17.67	-1.62752	0.0199964	0.161352	1	0.498685	1	CALM4_ARATH	100	8.59e-61	Calmodulin-4	ANM58126.1	100	6.82e-59	AT1G66410.4	100	2.43e-61	calmodulin 4
1	31494.c1.g1.i6	58.18	10.93	1.95	2.47	-1.58826	0.111592	-2.95186	0.000991779	0.568787	1	PCO2_ARATH	89.868	1.49e-149	Plant cysteine oxidase 2 {ECO:0000303|PubMed:24599061}	ANM69297.1	89.177	1.81e-148	AT5G39890.2	89.177	1.5e-150	2-aminoethanethiol dioxygenase putative (DUF1637)
1	31497.c1.g3.i3	269.46	19.88	14.73	14.97	-2.91772	1.53e-05	-0.953108	0.565878	0.261074	1	NDK1_ARATH	85.827	1.57e-74	Nucleoside diphosphate kinase 1	XP_010431379.1	88	1.52e-74	AT4G09320.1	85.827	2.17e-74	nucleoside diphosphate kinase
1	31500.c0.g1.i2	17.41	0.4	0.11	0	-4.4254	9.75e-06	-2.32401	0.193112	-3.95976	1	NTF2B_ARATH	34.127	3.75e-08	Nuclear transport factor 2B {ECO:0000303|PubMed:16428596}	BAB10698.1	76.179	0	AT5G48650.1	75.434	0	Nuclear transport factor 2 (NTF2) family protein with RNA binding (RRM-RBD-RNP motifs) domain-containing protein
1	31503.c1.g5.i2	32.9	5.09	5.59	5.63	-1.80254	0.0355887	-0.408316	1	0.248599	1	R10A2_ARATH	89.844	4.81e-64	60S ribosomal protein L10a-2	XP_010521653.1	92.969	3.18e-66	AT2G27530.2	89.844	6.63e-64	Ribosomal protein L1p/L10e family	PF06200.13
1	31505.c2.g2.i1	21.75	2.17	3.52	4.27	-2.33684	0.00430204	0.122375	1	0.539076	1	C3H23_ARATH	66.877	4.24e-120	Zinc finger CCCH domain-containing protein 23	EFH55160.1	65.397	1.84e-119	AT2G25900.2	66.981	6.74e-120	Zinc finger C-x8-C-x5-C-x3-H type family protein						GO:0001666,GO:0003674,GO:0003676,GO:0003677,GO:0005488,GO:0005515,GO:0005575,GO:0005634,GO:0005677,GO:0006139,GO:0006351,GO:0006355,GO:0006725,GO:0006807,GO:0006950,GO:0008150,GO:0008152,GO:0009058,GO:0009059,GO:0009266,GO:0009409,GO:0009628,GO:0009889,GO:0009892,GO:0009893,GO:0009987,GO:0010048,GO:0010468,GO:0010556,GO:0010604,GO:0010605,GO:0010629,GO:0010638,GO:0016070,GO:0016604,GO:0016607,GO:…
1	31506.c8.g1.i2	20.4	0.93	0.23	0.16	-3.4508	0.00643622	-2.39206	0.37027	-0.278479	1
1	31507.c1.g6.i2	23.71	9.24	0	0	-0.519713	1	-9.42394	1.8e-07	0	1	YIPL_SOLTU	64.341	1.3e-50	Protein yippee-like	AEC09781.1	75.573	1.61e-60	AT2G40110.2	75.573	1.33e-62	Yippee family putative zinc-binding protein						GO:0003674,GO:0003824,GO:0004351,GO:0005488,GO:0005515,GO:0005516,GO:0005575,GO:0005829,GO:0006082,GO:0006520,GO:0006536,GO:0006807,GO:0008150,GO:0008152,GO:0009064,GO:0009987,GO:0010035,GO:0010038,GO:0016829,GO:0016830,GO:0016831,GO:0019752,GO:0019842,GO:0030170,GO:0036094,GO:0042221,GO:0043167,GO:0043168,GO:0043436,GO:0043648,GO:0044237,GO:0044238,GO:0044281,GO:0044424,GO:0044444,GO:0044464,GO:…
1	31515.c0.g2.i1	32.31	1.14	0.29	0.29	-3.93884	2.79e-06	-2.3741	0.309796	0.26952	1					AAM65135.1	84.153	1.76e-97	AT5G21070.1	84.239	6.21e-100	Fe(3+) dicitrate transport system permease
1	31520.c0.g1.i1	30.35	7.4	0.07	0.13	-1.13065	0.640351	-6.85513	6.01e-07	1.00592	1	DIR20_ARATH	98.052	5.1e-101	Dirigent protein 20	XP_010480046.1	98.052	5.25e-99	AT1G55210.2	98.065	5.12e-101	Disease resistance-responsive (dirigent-like protein) family protein						GO:0005575,GO:0005634,GO:0005730,GO:0005829,GO:0006873,GO:0008150,GO:0009845,GO:0009987,GO:0010035,GO:0010038,GO:0010226,GO:0019725,GO:0032501,GO:0042221,GO:0042592,GO:0043226,GO:0043227,GO:0043228,GO:0043229,GO:0043231,GO:0043232,GO:0044422,GO:0044424,GO:0044428,GO:0044444,GO:0044446,GO:0044464,GO:0044699,GO:0044707,GO:0044763,GO:0048878,GO:0050801,GO:0050896,GO:0055082,GO:0065007,GO:0065008
1	31520.c0.g2.i1	327.58	20.93	9.6	7.91	-3.0703	4.18e-05	-1.60824	0.108092	-0.0213105	1	DIR20_ARATH	88.298	7.82e-111	Dirigent protein 20	XP_010501132.1	83.415	6.31e-111	AT1G55210.2	88.36	7.86e-111	Disease resistance-responsive (dirigent-like protein) family protein
1	31541.c1.g1.i1	13.03	0.05	0.01	0.01	-6.92465	2.93e-13	-2.34053	1	0.201591	1	FUS3_ARATH	55.2	2.89e-38	B3 domain-containing transcription factor FUS3	EFH53251.1	56.098	8.27e-37	AT3G26790.1	52.866	2.08e-35	AP2/B3-like transcriptional factor family protein						GO:0001101,GO:0003674,GO:0003824,GO:0004842,GO:0005488,GO:0005575,GO:0006508,GO:0006511,GO:0006629,GO:0006720,GO:0006725,GO:0006807,GO:0006950,GO:0008150,GO:0008152,GO:0008270,GO:0008299,GO:0008610,GO:0009056,GO:0009057,GO:0009058,GO:0009059,GO:0009414,GO:0009415,GO:0009628,GO:0009698,GO:0009699,GO:0009893,GO:0009987,GO:0010025,GO:0010033,GO:0010035,GO:0010143,GO:0010166,GO:0010243,GO:0010345,GO:…
1	31554.c0.g2.i2	6.79	2.67	0.17	0.08	-0.410246	1	-4.18879	0.00154531	-0.541878	1					OAO97495.1	91.176	3.3e-13	AT4G16770.1	70.588	9.99e-09	2-oxoglutarate (2OG) and Fe(II)-dependent oxygenase superfamily protein			ExpAA=85.86^PredHel=4^Topology=o22-44i56-78o93-115i120-139o	ENOG410XQM0	ath:AT3G07950
1	31555.c0.g2.i1	46.5	5.01	4.05	4.21	-2.33626	0.00176202	-0.794504	1	0.284575	1					CAB67621.1	76.336	1.45e-43	AT3G57930.2	76.515	9.56e-47	rho GTPase-activating gacO-like protein
1	31558.c2.g1.i3	18.37	4.96	1.69	1.41	-1.0199	0.556807	-2.08718	0.00359189	-0.0618287	1	OST4C_ARATH	97.143	1.9e-15	Dolichyl-diphosphooligosaccharide--protein glycosyltransferase subunit 4C	CDY55545.1	94.872	2.41e-15	AT3G09455.2	97.222	1.94e-15	dolichyl-diphosphooligosaccharide-protein glycosyltransferase subunit
1	31558.c2.g3.i3	64.46	6.7	3.33	3.4	-2.41391	0.000611918	-1.49154	0.218363	0.272521	1	OST4B_ARATH	100	1.33e-16	Dolichyl-diphosphooligosaccharide--protein glycosyltransferase subunit 4B	CDY55545.1	92.105	5.16e-15	AT5G02502.1	100	1.34e-16	Oligosaccaryltransferase
1	31560.c1.g1.i2	151.69	17.34	26.73	26.48	-2.1984	0.00920656	0.0442212	1	0.224674	1	TOM71_ARATH	78.667	3.08e-26	Mitochondrial import receptor subunit TOM7-1	ESQ46773.1	78.667	1.1e-24	AT5G41685.1	78.947	3.09e-26	Mitochondrial outer membrane translocase complex subunit Tom7
1	31573.c1.g2.i1	80.57	30.26	11.36	4.77	-0.555668	1	-1.89595	0.0115498	-0.966782	1					EFH47713.1	90.184	4.57e-97	AT5G11090.1	89.506	6.81e-96	serine-rich protein-like protein
1	31575.c1.g1.i1	27.47	2	0	0	-2.94475	0.00777679	-6.17808	0.00985598	0	1					OAO95327.1	83.158	1.64e-32	AT5G44005.1	82.292	1.58e-33	hypothetical protein				ENOG410XS10	ath:AT4G04920	GO:0000166,GO:0003674,GO:0003824,GO:0005215,GO:0005488,GO:0005524,GO:0005575,GO:0005886,GO:0006810,GO:0006811,GO:0006812,GO:0006818,GO:0008150,GO:0008324,GO:0008553,GO:0015075,GO:0015077,GO:0015078,GO:0015399,GO:0015405,GO:0015662,GO:0015672,GO:0015992,GO:0016020,GO:0016021,GO:0016462,GO:0016787,GO:0016817,GO:0016818,GO:0016820,GO:0016887,GO:0017076,GO:0017111,GO:0019829,GO:0022804,GO:0022853,GO:…
1	31580.c0.g2.i1	80.66	13.25	47.09	40.05	-1.66032	0.0292654	1.22242	0.170884	0.0657615	1	TI214_CRUWA	90.976	0	Protein TIC 214 {ECO:0000250|UniProtKB:P56785}	AFM92338.1	91.707	0	ATCG01130.1	90	0	Ycf1 protein				COG0724	ath:AT2G43410
1	31580.c0.g3.i4	18.93	4.99	0.87	1.18	-1.06146	0.671637	-3.06249	0.0166325	0.691187	1	C7A15_ARATH	80.303	8.74e-79	Cytochrome P450 72A15	XP_010487267.1	78.358	1.12e-77	AT3G14690.2	80.303	1.09e-78	cytochrome P450 family 72 subfamily A polypeptide 15
1	31580.c0.g4.i2	187.16	33.5	135.7	143.73	-1.54127	0.0412508	1.42755	0.0548459	0.362309	1	TI214_BARVE	88.316	0	Protein TIC 214 {ECO:0000250|UniProtKB:P56785}	AFM92338.1	90.122	0	ATCG01130.1	85.455	0	Ycf1 protein
1	31590.c2.g1.i6	8.83	2.16	0.06	0.14	-1.30097	0.807789	-5.19691	0.00774714	1.11949	1	CSE_ARATH	31.132	3.38e-09	Caffeoylshikimate esterase	AAL15341.1	95.146	1.71e-62	AT2G47630.1	95.146	1.41e-64	alpha/beta-Hydrolases superfamily protein
1	31593.c8.g1.i1	35.35	11.17	0.14	0.23	-0.908658	0.958896	-6.76026	1.52e-10	0.970909	1	WTR7_ARATH	74.041	6.74e-153	WAT1-related protein At1g43650	EFH70218.1	75.221	2.42e-151	AT1G43650.1	74.242	2.07e-150	nodulin MtN21 /EamA-like transporter family protein
1	31598.c2.g1.i4	22.47	2.75	10.05	8.15	-2.05857	0.00676856	1.2965	0.195068	-0.030579	1	HDT2_ARATH	72.449	8.66e-43	Histone deacetylase HDT2	EOA19451.1	80.612	1.47e-48	AT5G22650.2	72.449	1.06e-42	histone deacetylase 2B						GO:0003674,GO:0003676,GO:0003824,GO:0003964,GO:0004175,GO:0004190,GO:0004518,GO:0004519,GO:0005488,GO:0006139,GO:0006259,GO:0006310,GO:0006725,GO:0006807,GO:0008150,GO:0008152,GO:0008233,GO:0009987,GO:0015074,GO:0016740,GO:0016772,GO:0016779,GO:0016787,GO:0016788,GO:0034061,GO:0034641,GO:0043167,GO:0043169,GO:0043170,GO:0044237,GO:0044238,GO:0044260,GO:0046483,GO:0046872,GO:0070001,GO:0070011,GO:…
1	31600.c0.g1.i2	42.91	20.15	8.83	8.05	-0.192835	1	-1.71496	0.023653	0.14681	1	RTNLD_ARATH	84.286	5.21e-67	Reticulon-like protein B4	Q9FFS0.1	84.286	8.69e-65	AT5G41600.1	84.286	7.17e-67	VIRB2-interacting protein 3				COG0495	ath:AT4G04350`KO:K01869
1	31600.c1.g1.i5	22.43	0.78	0.46	0.27	-3.96531	1.42e-09	-1.33442	0.425326	-0.421361	1	RTNLC_ARATH	91.373	7.05e-120	Reticulon-like protein B3	XP_010418453.1	92.913	2.18e-118	AT1G64090.1	91.406	6.77e-120	Reticulan like protein B3
1	31601.c1.g1.i2	292.72	87.37	19.66	17.92	-0.907105	0.78741	-2.61314	0.00307304	0.0659696	1					EOA32794.1	77.88	8.47e-79	AT3G10040.1	73.709	2.79e-77	sequence-specific DNA binding transcription factor
1	31601.c1.g2.i1	85.29	21.55	6.96	5.29	-1.0752	1	-2.14525	0.0231321	-0.17217	1					EOA32794.1	89.706	7.97e-27	AT3G10040.1	83.077	4.54e-27	sequence-specific DNA binding transcription factor	PF00076.21
1	31607.c0.g1.i5	31.33	0.58	0.07	0	-4.80596	3.28e-08	-3.02504	0.666704	-1.77648	1	CSPL7_ARATH	84.817	4.97e-83	CASP-like protein 2B2	AAM66995.1	84.817	6.23e-81	AT2G35760.1	84.817	6.85e-83	Uncharacterized protein family (UPF0497)				ENOG410XTHA	ath:AT1G24320`KO:K01228
1	31607.c0.g2.i1	59.2	0.63	0.55	0.57	-5.61592	1.37e-09	-0.733404	1	0.262043	1	CSPL7_ARATH	88	6.07e-62	CASP-like protein 2B2	Q8L924.2	88	1.01e-59	AT2G35760.1	88	8.36e-62	Uncharacterized protein family (UPF0497)						GO:0000166,GO:0003674,GO:0003824,GO:0004672,GO:0004674,GO:0004702,GO:0004707,GO:0004871,GO:0005057,GO:0005488,GO:0005524,GO:0005575,GO:0005634,GO:0005739,GO:0005829,GO:0007165,GO:0008150,GO:0009738,GO:0009755,GO:0009987,GO:0010468,GO:0016301,GO:0016740,GO:0016772,GO:0016773,GO:0017076,GO:0019222,GO:0030554,GO:0032553,GO:0032555,GO:0032559,GO:0035639,GO:0036094,GO:0043167,GO:0043168,GO:0043226,GO:…
1	31608.c3.g1.i2	37.3	4.36	3.54	2.9	-2.18068	0.00148539	-0.817811	0.965953	-0.0497254	1	VPS2B_ARATH	97.297	8.42e-138	Vacuolar protein sorting-associated protein 2 homolog 2	ESQ39522.1	95.946	3.1e-136	AT5G44560.1	97.309	1.02e-137	SNF7 family protein						GO:0001071,GO:0003674,GO:0003676,GO:0003677,GO:0003700,GO:0005488,GO:0005575,GO:0005634,GO:0006139,GO:0006351,GO:0006725,GO:0006807,GO:0008150,GO:0008152,GO:0009058,GO:0009059,GO:0009987,GO:0016070,GO:0018130,GO:0019438,GO:0032774,GO:0034641,GO:0034645,GO:0034654,GO:0043170,GO:0043226,GO:0043227,GO:0043229,GO:0043231,GO:0044237,GO:0044238,GO:0044249,GO:0044260,GO:0044271,GO:0044424,GO:0044464,GO:…
1	31608.c3.g2.i2	37.21	2.18	0.51	0.59	-3.19093	8.73e-06	-2.58997	0.0107126	0.42431	1	VPS2B_ARATH	96.396	7.43e-136	Vacuolar protein sorting-associated protein 2 homolog 2	KFK31651.1	93.421	1.97e-134	AT5G44560.1	96.413	7.48e-136	SNF7 family protein
1	31609.c0.g1.i1	31.86	2.8	0.06	0.06	-2.60327	0.0700187	-5.58042	0.00258355	0.243662	1					EFH70163.1	90.909	7e-172	AT1G35780.1	89.547	8.49e-173	N-lysine methyltransferase		sigP:1^27^0.796^YES		ENOG410YG8Q	ath:AT1G09390	GO:0003674,GO:0003824,GO:0005488,GO:0005575,GO:0005739,GO:0006629,GO:0006644,GO:0006650,GO:0006655,GO:0006793,GO:0006796,GO:0008150,GO:0008152,GO:0008444,GO:0008610,GO:0008654,GO:0009058,GO:0009507,GO:0009526,GO:0009536,GO:0009668,GO:0009941,GO:0009987,GO:0010027,GO:0016020,GO:0016021,GO:0016043,GO:0016740,GO:0016772,GO:0016780,GO:0017169,GO:0019637,GO:0030145,GO:0031090,GO:0031224,GO:0031967,GO:…
1	31615.c1.g3.i1	44.19	11.32	5.32	3.47	-1.05273	0.490648	-1.65648	0.0442469	-0.377195	1	ALT3_ARATH	93.571	1.55e-96	Acyl-acyl carrier protein thioesterase ATL3, chloroplastic {ECO:0000305}	EFH64910.1	84.971	1.2e-96	AT1G68260.1	93.571	2.13e-96	Thioesterase superfamily protein	PF09787.8
1	31616.c0.g2.i2	246	24.92	62.27	73.74	-2.35444	0.00143419	0.701841	0.907312	0.538012	1	RPOA_NASOF	97.792	0	DNA-directed RNA polymerase subunit alpha {ECO:0000255|HAMAP-Rule:MF_00059}	AFM92312.1	98.423	0	ATCG00740.1	95.925	0	RNA polymerase subunit alpha
1	31617.c2.g1.i1	44.15	0.51	2.36	1.79	-5.53694	8.98e-09	1.62879	0.70285	-0.165773	1	CALR2_ARATH	95.652	1.03e-22	Calreticulin-2	AAB70919.1	95.652	4.48e-21	AT1G09210.1	95.652	1.38e-22	calreticulin 1b				COG2801	ath:ArthMp070	GO:0001510,GO:0003674,GO:0003676,GO:0003723,GO:0003824,GO:0004482,GO:0005488,GO:0005575,GO:0005634,GO:0005845,GO:0006139,GO:0006370,GO:0006396,GO:0006397,GO:0006725,GO:0006807,GO:0008150,GO:0008152,GO:0008168,GO:0008170,GO:0008173,GO:0008174,GO:0008757,GO:0009451,GO:0009452,GO:0009987,GO:0016070,GO:0016071,GO:0016740,GO:0016741,GO:0032259,GO:0032991,GO:0034518,GO:0034641,GO:0036260,GO:0036265,GO:…
1	31617.c2.g2.i1	20.37	1.17	0.76	1.03	-3.21906	0.000409241	-1.16013	1	0.598529	1	CALR2_ARATH	96.403	3.04e-80	Calreticulin-2	Q38858.3	96.403	5.07e-78	AT1G09210.1	96.403	4.17e-80	calreticulin 1b
1	31631.c0.g1.i2	5.76	1.24	0.31	0.25	-1.23887	0.830404	-2.44934	0.0350071	-0.0138713	1	WRK48_ARATH	91.195	1.52e-82	Probable WRKY transcription factor 48	ESQ32342.1	89.937	4.42e-82	AT5G49520.1	91.25	1.78e-82	WRKY DNA-binding protein 48
1	31631.c1.g1.i8	10.13	2.49	0.93	0.85	-1.12233	0.409967	-1.98736	0.0444667	0.170215	1					EOA37121.1	85.366	6.56e-52	AT1G42480.2	88.496	7.08e-54	TLR4 regulator/MIR-interacting MSAP protein
1	31631.c2.g1.i2	18.53	0.57	0.02	0.02	-4.05428	0.0014704	-4.92039	0.0263471	0.198846	1	EDA2_ARATH	25.417	2.88e-26	Probable serine protease EDA2	XP_010493394.1	80.282	0	AT5G22860.1	78.514	0	Serine carboxypeptidase S28 family protein
1	31639.c0.g1.i3	26.47	1.94	0.72	1.04	-2.94769	0.000171	-1.92879	0.111609	0.874797	1	ARR12_ARATH	50	2.55e-17	Two-component response regulator ARR12	XP_023633662.1	84.818	1.41e-173	AT4G16060.1	83.916	7.24e-160	hypothetical protein	PF12165.7
1	31640.c2.g1.i1	100.82	2.15	0.14	0	-4.57174	8.03e-06	-3.85134	0.237298	-1.77646	1	VITH1_ARATH	97.674	9.06e-22	Vacuolar iron transporter homolog 1	EFH66687.1	97.674	1.4e-19	AT1G21140.1	97.727	9.07e-22	Vacuolar iron transporter (VIT) family protein
1	31651.c3.g1.i17	138.63	51.38	4.34	2.53	-0.545256	1	-4.0331	3.95e-07	-0.495499	1	DLO2_ARATH	79.638	4.84e-124	Protein DMR6-LIKE OXYGENASE 2 {ECO:0000303|PubMed:25376907}	XP_010455445.1	89.95	8.27e-129	AT4G10490.1	79.638	6.67e-124	2-oxoglutarate (2OG) and Fe(II)-dependent oxygenase superfamily protein	PF01406.18
1	31655.c3.g1.i2	277.71	47.31	67.3	65.82	-1.71523	0.0189492	-0.0130715	1	0.216201	1	PRX2B_ARATH	93.59	6.21e-45	Peroxiredoxin-2B	AEE34448.2	86.207	9.97e-44	AT1G65980.2	86.207	8.22e-46	thioredoxin-dependent peroxidase 1	PF05817.13
1	31661.c4.g1.i1	14.11	0.56	0.03	0.04	-3.77009	8.37e-06	-3.9681	0.113382	0.198767	1	SD18_ARATH	95.238	1.04e-119	Receptor-like serine/threonine-protein kinase SD1-8	ADQ37383.1	97.959	5.66e-127	AT4G21380.1	95.238	1.11e-119	receptor kinase 3
1	31666.c5.g1.i3	117.86	31.95	15.07	19.08	-1.03569	0.382513	-1.60087	0.0378643	0.570195	1					XP_010492749.1	82.313	3.96e-61	AT5G17840.1	78.146	5.72e-56	DnaJ/Hsp40 cysteine-rich domain superfamily protein
1	31667.c0.g2.i1	31.93	0.39	0.08	0.22	-5.39608	1.41e-10	-2.19618	1	1.13379	1	Y4498_ARATH	51.489	7.19e-72	Uncharacterized protein At4g04980	ANM60561.1	76.543	1.64e-127	AT1G11070.4	76.543	1.35e-129	hydroxyproline-rich glycoprotein family protein		sigP:1^20^0.848^YES		ENOG410YKJY	ath:AT4G25260	GO:0001101,GO:0003674,GO:0003824,GO:0004438,GO:0004721,GO:0004725,GO:0005575,GO:0006629,GO:0006950,GO:0007154,GO:0007165,GO:0008150,GO:0008152,GO:0009414,GO:0009415,GO:0009605,GO:0009628,GO:0009987,GO:0009991,GO:0010008,GO:0010035,GO:0016020,GO:0016787,GO:0016788,GO:0016791,GO:0031090,GO:0031410,GO:0031668,GO:0031982,GO:0033554,GO:0034593,GO:0035556,GO:0042221,GO:0042578,GO:0042631,GO:0043226,GO:…
1	31667.c0.g6.i2	23.22	0.05	0.29	0.05	-7.56819	1.79e-11	1.61208	1	-1.71863	1	Y4498_ARATH	57.778	2.4e-54	Uncharacterized protein At4g04980	ANM60561.1	78.495	5.54e-89	AT1G11070.4	78.495	4.52e-91	hydroxyproline-rich glycoprotein family protein						GO:0000322,GO:0000325,GO:0000326,GO:0003674,GO:0005215,GO:0005372,GO:0005575,GO:0005773,GO:0005774,GO:0005887,GO:0006810,GO:0006811,GO:0006833,GO:0008150,GO:0009526,GO:0009705,GO:0009941,GO:0015204,GO:0015250,GO:0015267,GO:0015840,GO:0016020,GO:0016021,GO:0019755,GO:0022803,GO:0022838,GO:0022857,GO:0022891,GO:0022892,GO:0031090,GO:0031224,GO:0031226,GO:0031967,GO:0031975,GO:0034220,GO:0042044,GO:…
1	31688.c0.g6.i1	68.5	23.91	9.77	13.05	-0.580329	1	-1.83673	0.0190646	0.631569	1	RAD2B_ARATH	98.305	2.45e-36	Ras-related protein RABD2b	BAA97153.1	98.305	1.78e-34	AT5G47200.1	98.333	2.45e-36	RAB GTPase homolog 1A
1	31696.c0.g3.i4	310.24	27.37	38.85	44.43	-2.67414	0.00103044	-0.0304803	1	0.449103	1	EF1B2_ARATH	86.335	2.89e-62	Elongation factor 1-beta 2	XP_020878027.1	91.925	2.32e-64	AT5G19510.1	86.335	3.97e-62	Translation elongation factor EF1B/ribosomal protein S6 family protein
1	31699.c1.g1.i1	81.27	5.05	6.04	2.6	-3.13834	0.000194088	-0.384885	1	-0.94605	1	AGAL1_ARATH	89.512	0	Alpha-galactosidase 1 {ECO:0000303|PubMed:15034167}	XP_010452823.1	90.338	0	AT5G08380.1	89.538	0	alpha-galactosidase 1
1	31699.c1.g2.i4	21.58	0	0	0	-8.6542	4.4e-05	5.13e-15	1	0	1	DF307_ARATH	60.194	4.28e-40	Putative defensin-like protein 307	XP_010439955.1	66.019	1.85e-42	AT4G17718.1	60.577	4.29e-40	Defensin-like (DEFL) family protein						GO:0005575,GO:0005635,GO:0005643,GO:0005829,GO:0006405,GO:0006406,GO:0006810,GO:0006913,GO:0006996,GO:0006997,GO:0008150,GO:0009987,GO:0015931,GO:0016043,GO:0016973,GO:0031967,GO:0031975,GO:0032991,GO:0034399,GO:0043234,GO:0044422,GO:0044424,GO:0044428,GO:0044444,GO:0044446,GO:0044464,GO:0046907,GO:0050657,GO:0050658,GO:0051028,GO:0051168,GO:0051169,GO:0051179,GO:0051234,GO:0051236,GO:0051641,GO:…
1	31699.c1.g3.i2	24.74	0	0	0	-8.62938	4.77e-05	5.13e-15	1	0	1	DF307_ARATH	58.416	1.55e-33	Putative defensin-like protein 307	XP_010439955.1	61.165	6.36e-34	AT4G17718.1	58.824	1.55e-33	Defensin-like (DEFL) family protein						GO:0000166,GO:0003674,GO:0003774,GO:0003777,GO:0003824,GO:0005488,GO:0005515,GO:0005524,GO:0005575,GO:0005737,GO:0005819,GO:0005871,GO:0005874,GO:0005875,GO:0005886,GO:0006928,GO:0007017,GO:0007018,GO:0008017,GO:0008092,GO:0008150,GO:0008574,GO:0009987,GO:0015631,GO:0016020,GO:0016462,GO:0016787,GO:0016817,GO:0016818,GO:0016887,GO:0017076,GO:0017111,GO:0030554,GO:0032553,GO:0032555,GO:0032559,GO:…
1	31703.c1.g1.i4	26.66	0.49	0	0	-4.87734	2.44e-08	-5.58546	0.0308943	0	1					EOA37043.1	79.121	1.61e-88	AT1G21090.1	80.22	3.33e-90	Cupredoxin superfamily protein				COG1998	ath:AT2G47110`KO:K02977	GO:0003674,GO:0003676,GO:0003723,GO:0003824,GO:0004518,GO:0004519,GO:0005488,GO:0005575,GO:0006139,GO:0006725,GO:0006807,GO:0008150,GO:0008152,GO:0009451,GO:0009987,GO:0016070,GO:0016787,GO:0016788,GO:0034641,GO:0043170,GO:0043226,GO:0043227,GO:0043229,GO:0043231,GO:0043412,GO:0044237,GO:0044238,GO:0044260,GO:0044424,GO:0044464,GO:0046483,GO:0071704,GO:0090304,GO:0097159,GO:1901360,GO:1901363
1	31703.c1.g2.i1	20.36	0.93	0.05	0.11	-3.60779	0.000288124	-4.08798	0.169626	1.00467	1					OAP18275.1	87.162	1.21e-79	AT1G21090.1	87.162	1.09e-81	Cupredoxin superfamily protein
1	31705.c1.g2.i1	144.37	8.66	1.06	1.56	-3.1032	0.0176627	-3.41371	0.0221914	0.709543	1	GL21_ARATH	90.355	6.4e-128	Germin-like protein subfamily 2 member 1	OAP16606.1	91.371	7.41e-127	AT1G09560.1	90.355	8.84e-128	germin-like protein 5
1	31705.c1.g3.i1	36.04	2.22	0.35	0.16	-3.04619	0.000153671	-3.03997	0.00825974	-0.822831	1	GL21_ARATH	89.34	3.28e-123	Germin-like protein subfamily 2 member 1	EOA38478.1	90.863	2.2e-122	AT1G09560.1	88.945	2.54e-123	germin-like protein 5
1	31711.c0.g2.i10	10.84	7.38	1.16	0.2	0.391273	1	-3.25135	4.35e-05	-2.29915	1	PUP8_ARATH	85.789	0	Probable purine permease 8	OAO99820.1	86.053	0	AT4G18195.1	85.789	0	purine permease 8
1	31716.c0.g1.i1	37.29	0.27	0.06	0.03	-6.1342	6.31e-14	-2.35246	0.9792	-0.573277	1	MTEF1_ARATH	45.417	7.55e-61	Transcription termination factor MTEF1, chloroplastic {ECO:0000305}	EOA27575.1	91.864	0	AT2G34620.1	89.865	0	Mitochondrial transcription termination factor family protein						GO:0003674,GO:0003824,GO:0004497,GO:0005488,GO:0005506,GO:0005575,GO:0008150,GO:0008152,GO:0009058,GO:0016020,GO:0016021,GO:0016491,GO:0016705,GO:0016709,GO:0019748,GO:0020037,GO:0031224,GO:0043167,GO:0043169,GO:0044425,GO:0044550,GO:0044699,GO:0044710,GO:0044711,GO:0046872,GO:0046906,GO:0046914,GO:0097159,GO:1901363
1	31721.c0.g1.i4	18.21	0.35	0.14	0.1	-4.77883	3.75e-09	-1.7443	0.784515	-0.286937	1	RLP55_ARATH	79.012	1.19e-152	Receptor-like protein 55 {ECO:0000303|PubMed:18434605}	EFH41484.1	81.592	8.34e-157	AT5G45770.1	79.064	8.07e-153	receptor like protein 55
1	31732.c3.g1.i1	18.49	0.7	0.77	0.69	-3.89842	0.000612722	-0.356502	1	0.0938091	1	ZFP8_ARATH	80	7.68e-77	Zinc finger protein 8 {ECO:0000305}	XP_013747799.1	69.355	1.87e-80	AT2G41940.1	80	1.06e-76	zinc finger protein 8				ENOG410XP0P	ath:AT5G16310`KO:K05610
1	31732.c3.g3.i1	8.42	0.22	0.11	0.16	-4.41217	0.000266322	-1.29226	1	0.636593	1	ZFP8_ARATH	80.859	1.83e-119	Zinc finger protein 8 {ECO:0000305}	EFH56220.1	79.688	3.59e-120	AT2G41940.1	80.859	2.53e-119	zinc finger protein 8
1	31734.c0.g2.i1	8.75	2.7	0.15	0	-0.811377	1	-4.35812	0.0164882	-3.42205	1					XP_020891596.1	90.184	2.06e-89	AT1G72510.2	87.349	2.02e-90	DUF1677 family protein (DUF1677)
1	31737.c2.g1.i1	4.08	0.03	0.06	0.17	-5.89028	0.0124159	0.457183	1	1.42848	1																	GO:0003006,GO:0003674,GO:0003676,GO:0003723,GO:0003729,GO:0005488,GO:0005575,GO:0005634,GO:0005681,GO:0005829,GO:0006139,GO:0006396,GO:0006397,GO:0006725,GO:0006807,GO:0006810,GO:0008150,GO:0008152,GO:0008380,GO:0009987,GO:0010228,GO:0015931,GO:0016070,GO:0016071,GO:0022414,GO:0030529,GO:0032502,GO:0032991,GO:0034641,GO:0043170,GO:0043226,GO:0043227,GO:0043229,GO:0043231,GO:0044237,GO:0044238,GO:…
1	31740.c7.g1.i5	753.35	6.23	0.67	0.14	-5.95768	1.1e-05	-3.51444	0.155309	-1.73613	1					XP_010413029.1	96.429	2.72e-07	AT2G43150.1	96.429	9.15e-09	Proline-rich extensin-like family protein
1	31740.c7.g2.i2	302.26	16.31	0.44	0.24	-3.23975	0.0696093	-5.38803	0.0116469	-0.624762	1					EOA28237.1	59.184	8.09e-11	AT2G43150.1	92.857	9.74e-09	Proline-rich extensin-like family protein				ENOG410YM4K	ath:AT5G45830	GO:0003674,GO:0003824,GO:0004312,GO:0004320,GO:0005575,GO:0006082,GO:0006629,GO:0006631,GO:0006633,GO:0008150,GO:0008152,GO:0008610,GO:0009058,GO:0009507,GO:0009536,GO:0009987,GO:0016053,GO:0016295,GO:0016296,GO:0016297,GO:0016740,GO:0016746,GO:0016747,GO:0016787,GO:0016788,GO:0016790,GO:0019752,GO:0032787,GO:0043226,GO:0043227,GO:0043229,GO:0043231,GO:0043436,GO:0044237,GO:0044238,GO:0044249,GO:…
1	31749.c0.g1.i3	39.58	6.58	0.11	0.26	-1.84401	0.116319	-6.25899	4.25e-07	1.45505	1	AGP26_ARATH	87	1.13e-31	Classical arabinogalactan protein 26	XP_020874868.1	64.804	3.03e-52	AT2G47935.1	63.314	7.09e-50	transmembrane protein						GO:0005575,GO:0005783,GO:0005789,GO:0016020,GO:0016021,GO:0031224,GO:0043226,GO:0043227,GO:0043229,GO:0043231,GO:0044422,GO:0044424,GO:0044425,GO:0044432,GO:0044444,GO:0044446,GO:0044464
1	31754.c0.g1.i2	12.27	0.59	3.51	5.22	-3.44551	0.000237561	1.99499	0.198297	0.784536	1	GLPK_ARATH	95.833	7.92e-80	Glycerol kinase	AEE36408.1	95.833	5.79e-78	AT1G80460.2	95.833	4.76e-80	Actin-like ATPase superfamily protein
1	31764.c0.g1.i1	338.2	8.64	0.79	1.11	-4.45383	3.14e-11	-3.89405	2.83e-06	0.6611	1	HA22C_ARATH	96.739	1.26e-129	HVA22-like protein c	EFH63510.1	96.739	4.06e-128	AT1G69700.1	96.757	1.27e-129	HVA22 homologue C
1	31776.c2.g1.i4	74.47	3.36	1.3	1.03	-3.58783	3.81e-06	-1.8436	0.128498	-0.00640555	1	PATL6_ARATH	24.762	4.22e-13	Patellin-6	EOA33881.1	84.906	0	AT1G75170.2	83.699	0	Sec14p-like phosphatidylinositol transfer family protein
1	31785.c0.g2.i6	60.67	8.71	4.42	3.39	-1.95402	0.0113398	-1.47281	0.141332	-0.122503	1	RL303_ARATH	92.405	2.73e-43	60S ribosomal protein L30-3	XP_010487794.1	93.671	7.27e-42	AT3G18740.1	92.405	3.76e-43	Ribosomal protein L7Ae/L30e/S12e/Gadd45 family protein
1	31785.c0.g3.i1	740.19	125.47	142.65	121.38	-1.69215	0.0373569	-0.364027	1	-0.0122879	1	RL303_ARATH	98.969	1.88e-65	60S ribosomal protein L30-3	Q9LSA3.1	98.969	3.13e-63	AT3G18740.1	98.969	2.59e-65	Ribosomal protein L7Ae/L30e/S12e/Gadd45 family protein				ENOG410XS7T	ath:AT1G21130
1	31789.c1.g1.i1	14.46	1.23	0.13	0.09	-2.71996	0.00551706	-3.603	0.0196182	-0.281007	1	YCF39_CYAPA	47.953	4.38e-109	Uncharacterized protein ycf39	XP_018447606.1	86.124	0	AT4G35250.1	88.038	0	NAD(P)-binding Rossmann-fold superfamily protein	PF00168.29
1	31804.c0.g1.i3	112.99	39.27	6.81	6.26	-0.637694	1	-3.06488	0.000198528	0.174213	1					EFH52360.1	87.432	4.25e-103	AT3G51730.1	82.564	1.36e-103	saposin B domain-containing protein
1	31806.c1.g1.i1	118.88	17.05	15.7	11.77	-1.94137	0.0156863	-0.667213	1	-0.18401	1	TBA5_ARATH	100	2.23e-40	Tubulin alpha-5 chain	XP_020148325.1	100	1.1e-39	AT5G19780.1	100	3.02e-40	tubulin alpha-5
1	31807.c0.g3.i1	44.5	0	0	0	-8.34365	1.94e-06	5.13e-15	1	0	1					EOA21648.1	100	4.41e-38	AT5G16250.1	96.721	7.22e-40	transmembrane protein			ExpAA=30.33^PredHel=1^Topology=o184-206i	COG2217	ath:AT5G44790`KO:K17686	GO:0001071,GO:0003674,GO:0003676,GO:0003677,GO:0003700,GO:0005488,GO:0005515,GO:0005575,GO:0005634,GO:0006139,GO:0006351,GO:0006725,GO:0006807,GO:0008150,GO:0008152,GO:0009058,GO:0009059,GO:0009987,GO:0016070,GO:0018130,GO:0019438,GO:0032774,GO:0034641,GO:0034645,GO:0034654,GO:0043170,GO:0043226,GO:0043227,GO:0043229,GO:0043231,GO:0043565,GO:0044237,GO:0044238,GO:0044249,GO:0044260,GO:0044271,GO:…
1	31808.c0.g3.i2	21.55	2.85	1.96	1.95	-2.04875	0.0162957	-1.04445	0.929463	0.234527	1	P4H2_ARATH	95.238	3.59e-168	Prolyl 4-hydroxylase 2 {ECO:0000305}	XP_006298105.2	95.671	1.25e-167	AT3G06300.1	95.238	4.96e-168	P4H isoform 2
1	31816.c0.g2.i1	841.14	79.97	39.8	35.83	-2.52703	0.00163323	-1.48394	0.136198	0.117757	1	EF1G1_ARATH	87.54	0	Probable elongation factor 1-gamma 1	EFH66021.1	88.179	0	AT1G09640.1	87.54	0	Translation elongation factor EF1B gamma chain	PF10250.8			COG3979	ath:AT2G43600`KO:K01183
1	31817.c1.g2.i1	644.88	57.44	28.63	37.46	-2.68732	0.00060699	-1.50527	0.11955	0.65781	1	R27AB_ARATH	97.826	8.71e-78	Ubiquitin-40S ribosomal protein S27a-2	XP_010413295.1	97.826	4.13e-77	AT2G47110.2	97.842	6.73e-78	ubiquitin 6				COG0013
1	31817.c1.g3.i1	102.88	17.53	28.35	36.58	-1.69114	0.0458123	0.163782	1	0.608578	1	R27AB_ARATH	97.81	5.83e-77	Ubiquitin-40S ribosomal protein S27a-2	ESQ43848.1	97.81	1.5e-75	AT2G47110.2	97.81	8.04e-77	ubiquitin 6
1	31829.c0.g1.i1	19.85	2.03	0	0	-2.39215	0.0721189	-6.12834	0.0380466	0	1												PF00847.19					GO:0000166,GO:0003674,GO:0003824,GO:0004497,GO:0004506,GO:0005488,GO:0005575,GO:0005783,GO:0008150,GO:0008152,GO:0016020,GO:0016021,GO:0016491,GO:0016705,GO:0016709,GO:0031090,GO:0031224,GO:0031966,GO:0036094,GO:0043167,GO:0043168,GO:0043226,GO:0043227,GO:0043229,GO:0043231,GO:0044422,GO:0044424,GO:0044425,GO:0044429,GO:0044444,GO:0044446,GO:0044464,GO:0044699,GO:0044710,GO:0048037,GO:0050660,GO:…
1	31834.c0.g2.i1	8.92	1.38	1.49	0.92	-1.7199	0.0390201	-0.428438	1	-0.45073	1	AARE_ARATH	88.845	0	Acylamino-acid-releasing enzyme {ECO:0000305}	XP_010435108.1	88.235	0	AT4G14570.1	87.638	0	acylaminoacyl-peptidase-like protein
1	31835.c0.g1.i1	14.4	1.38	13.84	10.4	-2.32422	0.0347884	2.65264	0.020377	-0.19918	1	OP161_ARATH	67.816	7.04e-27	Outer envelope pore protein 16-1, chloroplastic	XP_010470028.1	43.155	7.05e-55	AT2G28900.1	67.816	9.65e-27	outer plastid envelope protein 16-1
1	31835.c0.g2.i6	15.37	1.4	0.86	0.94	-2.5226	0.00257992	-1.26327	0.682791	0.310442	1	OP161_ARATH	59.184	3.15e-28	Outer envelope pore protein 16-1, chloroplastic	AAM60853.1	59.184	4.94e-26	AT2G28900.1	59.596	3.22e-28	outer plastid envelope protein 16-1
1	31836.c0.g1.i2	60.4	2.68	0.2	0.1	-3.68663	2.46e-06	-4.17966	9.05e-05	-0.655643	1	PATL6_ARATH	97.368	0	Patellin-6	XP_010515597.1	98.026	0	AT3G51670.1	97.377	0	SEC14 cytosolic factor family protein / phosphoglyceride transfer family protein
1	31839.c0.g1.i1	414.77	18.94	17.19	18.38	-3.52378	2.29e-08	-0.704978	1	0.273104	1	H4_SOYBN	100	1.84e-53	Histone H4	PON75956.1	100	1.76e-51	AT5G59970.2	100	2.53e-53	Histone superfamily protein
1	31839.c0.g2.i1	280.33	84.38	19.89	14.85	-0.774559	0.785621	-2.66817	2.39e-05	-0.222112	1	H4_SOYBN	100	2.49e-51	Histone H4	XP_004294578.1	99.065	1.43e-50	AT5G59970.2	100	2.5e-51	Histone superfamily protein
1	31839.c0.g4.i2	191.39	30.95	8.14	10.42	-1.64758	0.156963	-2.5815	0.000991779	0.554312	1	H4_SOYBN	98.78	1.33e-49	Histone H4	XP_010483643.1	98.78	4e-48	AT5G59970.2	98.795	1.33e-49	Histone superfamily protein
1	31839.c0.g5.i5	637.37	49.81	10.61	14.24	-2.70818	6.9e-05	-2.77206	0.00590933	0.565944	1	H4_SOYBN	100	6.32e-54	Histone H4	PON75956.1	100	4.82e-52	AT5G59970.2	100	6.33e-54	Histone superfamily protein				ENOG410XUE8	ath:AT4G24450`KO:K08244
1	31841.c0.g1.i1	8.82	1.35	0.94	0.63	-1.84034	0.0364586	-1.05167	0.948151	-0.328109	1	PFKA5_ARATH	89.394	0	ATP-dependent 6-phosphofructokinase 5, chloroplastic {ECO:0000255|HAMAP-Rule:MF_03186}	EOA26853.1	89.169	0	AT2G22480.1	89.394	0	phosphofructokinase 5
1	31850.c5.g1.i4	27.11	3.56	3.85	4.97	-1.96402	0.0226149	-0.54178	1	0.598203	1	MES11_ARATH	81.654	0	Putative methylesterase 11, chloroplastic	ESQ32551.1	82.812	0	AT3G29770.1	81.654	0	methyl esterase 11	PF01454.18
1	31853.c0.g1.i1	166.48	1.94	1.67	1.64	-5.58773	4.66e-10	-0.671738	1	0.173544	1	LTD_ARATH	89.744	5.91e-46	Protein LHCP TRANSLOCATION DEFECT	KFK39362.1	91.892	5.55e-61	AT1G50900.1	89.744	8.12e-46	Ankyrin repeat family protein						GO:0003674,GO:0005215,GO:0005575,GO:0005743,GO:0006810,GO:0006839,GO:0006862,GO:0008150,GO:0015291,GO:0015297,GO:0015748,GO:0015931,GO:0016020,GO:0016021,GO:0019866,GO:0022804,GO:0022857,GO:0031090,GO:0031224,GO:0031966,GO:0035352,GO:0043132,GO:0044422,GO:0044424,GO:0044425,GO:0044429,GO:0044444,GO:0044446,GO:0044464,GO:0044699,GO:0044765,GO:0051179,GO:0051181,GO:0051184,GO:0051234,GO:0051724,GO:…
1	31853.c0.g2.i1	125.06	1.5	0	0.8	-5.37644	1.1e-05	-2.84409	1	2.012	1	LTD_ARATH	82.222	1.43e-19	Protein LHCP TRANSLOCATION DEFECT	CDY29435.1	97.778	1.3e-21	AT1G50900.1	82.609	1.42e-19	Ankyrin repeat family protein						GO:0003674,GO:0003824,GO:0004721,GO:0005488,GO:0005575,GO:0005737,GO:0016787,GO:0016788,GO:0016791,GO:0042578,GO:0043167,GO:0043169,GO:0044424,GO:0044464,GO:0046872
1	31858.c0.g1.i3	12.85	1.25	0.99	0.59	-2.40459	0.00181418	-0.939985	1	-0.41053	1	GDL2_ARATH	91.57	0	GDSL esterase/lipase At1g09390	OAP13713.1	91.86	0	AT1G09390.1	91.594	0	GDSL-like Lipase/Acylhydrolase superfamily protein
1	31860.c0.g1.i5	16.56	0.22	0.04	0.17	-5.26373	2.21e-09	-2.57901	0.982405	1.89352	1	FK173_ARATH	86.076	5.21e-148	Peptidyl-prolyl cis-trans isomerase FKBP17-3, chloroplastic	EOA34034.1	86.498	1.82e-148	AT1G73655.1	86.134	5.25e-148	FKBP-like peptidyl-prolyl cis-trans isomerase family protein						GO:0000375,GO:0000377,GO:0000398,GO:0003674,GO:0003676,GO:0003723,GO:0003729,GO:0005488,GO:0005575,GO:0005681,GO:0006139,GO:0006396,GO:0006397,GO:0006725,GO:0006807,GO:0008150,GO:0008152,GO:0008380,GO:0009987,GO:0010445,GO:0016070,GO:0016071,GO:0016604,GO:0016607,GO:0030529,GO:0031053,GO:0032991,GO:0034470,GO:0034641,GO:0034660,GO:0043170,GO:0044237,GO:0044238,GO:0044260,GO:0044422,GO:0044424,GO:…
1	31862.c0.g5.i2	20.34	0.86	0	0	-3.58091	0.0158256	-6.9924	0.00319888	0	1	CIPKL_ARATH	96.394	0	CBL-interacting serine/threonine-protein kinase 21	EFH42480.1	97.596	0	AT5G57630.1	96.403	0	CBL-interacting protein kinase 21						GO:0000151,GO:0000152,GO:0003674,GO:0003824,GO:0004842,GO:0005488,GO:0005575,GO:0005680,GO:0006508,GO:0006511,GO:0006807,GO:0006950,GO:0006952,GO:0008150,GO:0008152,GO:0008270,GO:0009056,GO:0009057,GO:0009987,GO:0010033,GO:0010200,GO:0010243,GO:0010498,GO:0016021,GO:0016740,GO:0019538,GO:0019787,GO:0019941,GO:0030163,GO:0031224,GO:0031461,GO:0032991,GO:0042221,GO:0043161,GO:0043167,GO:0043169,GO:…
1	31866.c0.g1.i10	28.28	0.41	0	0.09	-5.14178	0.000129162	-5.54389	0.225454	3.30722	1	AGL5_ARATH	98.058	8.66e-53	Agamous-like MADS-box protein AGL5	OAP08475.1	98.113	7.81e-54	AT2G42830.1	98.058	1.19e-52	K-box region and MADS-box transcription factor family protein			ExpAA=52.73^PredHel=2^Topology=i3-25o40-59i			GO:0001071,GO:0003674,GO:0003676,GO:0003677,GO:0003700,GO:0005488,GO:0005515,GO:0005575,GO:0005634,GO:0006139,GO:0006351,GO:0006355,GO:0006725,GO:0006807,GO:0006950,GO:0008150,GO:0008152,GO:0009058,GO:0009059,GO:0009266,GO:0009409,GO:0009628,GO:0009889,GO:0009891,GO:0009893,GO:0009987,GO:0010440,GO:0010468,GO:0010556,GO:0010557,GO:0010604,GO:0010628,GO:0016070,GO:0018130,GO:0019219,GO:0019222,GO:…
1	31866.c0.g2.i3	10.22	0.46	0	0	-3.49769	0.00411487	-4.22543	0.827179	0	1	AGL1_ARATH	92.208	6.8e-63	Agamous-like MADS-box protein AGL1	XP_020880598.1	77	2.86e-61	AT3G58780.1	92.308	4.52e-63	K-box region and MADS-box transcription factor family protein
1	31873.c0.g3.i1	31.89	0.11	2.96	2.19	-7.07103	0.00255289	4.03292	0.00415768	-0.188478	1	ML328_ARATH	74.15	3.62e-80	MLP-like protein 328	ACC91258.1	89.796	5.09e-94	AT4G23680.1	86.395	3.45e-93	Polyketide cyclase/dehydrase and lipid transport superfamily protein	PF01535.19
1	31876.c0.g1.i7	14.11	1.76	0.03	0.03	-2.08405	0.0289626	-5.84813	5.28e-05	0.198792	1	GCT23_ARATH	76.042	8.34e-101	Gamma-glutamylcyclotransferase 2-3 {ECO:0000305}	KFK36196.1	76.042	7.54e-100	AT1G44790.1	76.042	1.15e-100	ChaC-like family protein	PF05477.10			COG0388	ath:AT3G44300`KO:K01501	GO:0000902,GO:0000904,GO:0001558,GO:0003006,GO:0003674,GO:0003824,GO:0004791,GO:0005575,GO:0005829,GO:0006935,GO:0008150,GO:0009653,GO:0009826,GO:0009860,GO:0009932,GO:0009987,GO:0010035,GO:0010038,GO:0010183,GO:0010769,GO:0015036,GO:0016043,GO:0016049,GO:0016209,GO:0016491,GO:0016651,GO:0016667,GO:0016668,GO:0019725,GO:0022414,GO:0022603,GO:0022604,GO:0032502,GO:0032989,GO:0040007,GO:0040008,GO:…
1	31878.c1.g1.i1	30.05	1.73	1.66	0.96	-3.21781	9.23e-06	-0.605577	1	-0.549654	1	XYL1_ARATH	93.834	0	Alpha-xylosidase 1	XP_010415479.1	94.731	0	AT1G68560.1	93.841	0	alpha-xylosidase 1	PF00722.20
1	31879.c7.g1.i3	8.87	3.05	0.03	0.06	-0.733884	1	-7.06751	4.54e-09	1.434	1	GDL49_ARATH	84.932	0	GDSL esterase/lipase At3g05180	ESQ49557.1	84.252	0	AT3G05180.1	84.973	0	GDSL-like Lipase/Acylhydrolase superfamily protein	PF07727.13					GO:0003674,GO:0005488,GO:0008270,GO:0043167,GO:0043169,GO:0046872,GO:0046914
1	31880.c1.g1.i1	20.92	4.32	1.53	1.54	-1.39408	0.144754	-1.98329	0.0294912	0.29686	1	RHA1B_ARATH	37.107	5.58e-28	E3 ubiquitin-protein ligase RHA1B {ECO:0000305}	AAD27870.1	92.982	8.5e-112	AT3G61460.1	92.982	7.04e-114	brassinosteroid-responsive RING-H2
1	31880.c2.g1.i6	5.16	1.85	0.04	0	-0.482791	1	-5.494	1.32e-05	-1.77638	1	LRX3_ARATH	96	1.05e-113	Leucine-rich repeat extensin-like protein 3	XP_020876376.1	96	7.92e-114	AT4G13340.1	96	1.44e-113	Leucine-rich repeat (LRR) family protein				COG0459	ath:AT3G23990`KO:K04077	GO:0003674,GO:0005215,GO:0005345,GO:0005575,GO:0006810,GO:0006863,GO:0008150,GO:0015205,GO:0015851,GO:0016020,GO:0016021,GO:0022857,GO:0022891,GO:0022892,GO:0031224,GO:0044425,GO:0044699,GO:0044765,GO:0051179,GO:0051234,GO:0071702,GO:0071705,GO:1902578
1	31881.c0.g1.i2	9.07	0.49	1.11	1.2	-3.31389	0.000185868	0.646842	1	0.332356	1					AAF82146.1	87.745	4.65e-116	AT1G15760.1	87.805	2.81e-118	Sterile alpha motif (SAM) domain-containing protein
1	31890.c0.g1.i4	349.78	38.95	6.22	8.06	-2.26575	0.0710165	-3.25986	2e-06	0.606602	1	MT23_BRAJU	84.483	1.07e-22	Metallothionein-like protein type 2, MT2-22	XP_020876814.1	89.091	6.93e-21	AT5G02380.1	88.889	9.06e-22	metallothionein 2B
1	31890.c0.g2.i2	142.89	3.14	36.69	48.34	-4.51134	4.65e-09	2.92154	0.000207831	0.651602	1	MT2_BRACM	88.889	3.41e-22	Metallothionein-like protein type 2	XP_013622119.1	88.889	1.6e-20	AT3G09390.2	89.13	1.23e-21	metallothionein 2A
1	31890.c0.g3.i4	105.08	1.8	21.13	34.05	-4.77642	2.62e-08	2.86022	0.00176105	0.959294	1	MT2_BRACM	91.071	1.81e-29	Metallothionein-like protein type 2	BAA11391.1	91.379	1.2e-28	AT3G09390.2	91.379	7.76e-29	metallothionein 2A
1	31911.c0.g2.i1	229.02	36.61	48.11	47.44	-1.79353	0.0227288	-0.168264	1	0.250689	1	RS31_ARATH	92.611	1.97e-135	40S ribosomal protein S3-1	ESQ51748.1	92.683	1.33e-137	AT2G31610.1	92.611	2.73e-135	Ribosomal protein S3 family protein
1	31923.c2.g1.i4	8.78	3.85	1.3	1.82	-0.306725	1	-2.13152	0.0309439	0.722224	1	DNAT2_ARATH	87.919	3.6e-87	1,4-dihydroxy-2-naphthoyl-CoA thioesterase 2 {ECO:0000303|PubMed:22372525}	EFH40192.1	89.262	4.28e-85	AT5G48950.1	87.919	4.97e-87	Thioesterase superfamily protein
1	31926.c0.g1.i3	15.96	10.82	3.83	2.26	0.356981	1	-2.04783	0.00445563	-0.531252	1					EFH52605.1	78.646	9.98e-96	AT3G56010.1	77.32	5.66e-91	transmembrane protein
1	31930.c0.g1.i5	369.34	42.17	22.26	18.68	-2.32972	0.00605111	-1.38661	0.389602	-0.017046	1	METE1_ARATH	99.597	0	5-methyltetrahydropteroyltriglutamate--homocysteine methyltransferase 1	CAE55863.1	99.597	0	AT5G17920.2	99.598	0	Cobalamin-independent synthase family protein
1	31935.c1.g1.i5	14	0.54	0.12	0.14	-3.84112	9.44e-07	-2.62234	0.114869	0.51791	1	SIP21_ARATH	79.167	5.28e-84	Probable aquaporin SIP2-1	XP_010504607.2	79.762	2e-82	AT3G56950.2	79.167	5.29e-84	small and basic intrinsic protein 2;1
1	31936.c0.g2.i4	18.57	3.04	2.88	1.51	-1.66826	0.0353367	-0.621399	1	-0.705508	1	AUG7_ARATH	96.657	0	AUGMIN subunit 7 {ECO:0000303|PubMed:22505726}	XP_010453961.1	97.872	0	AT5G17620.1	96.667	0	nuclear matrix protein		sigP:1^27^0.816^YES		COG3240	ath:AT5G08460	GO:0003674,GO:0003824,GO:0003939,GO:0005488,GO:0005575,GO:0005737,GO:0005829,GO:0005886,GO:0005911,GO:0008150,GO:0008152,GO:0008270,GO:0009506,GO:0016020,GO:0016491,GO:0016614,GO:0016616,GO:0030054,GO:0031090,GO:0031966,GO:0043167,GO:0043169,GO:0044422,GO:0044424,GO:0044429,GO:0044444,GO:0044446,GO:0044464,GO:0044699,GO:0044710,GO:0046872,GO:0046914,GO:0055114
1	31945.c0.g1.i6	32.58	2.55	0.43	0.29	-2.88705	0.000873978	-3.00458	0.00948426	-0.294514	1	VINSY_RAUSE	35.814	2.68e-74	Vinorine synthase	XP_010499177.1	90.411	0	AT1G24430.1	88.761	0	HXXXD-type acyl-transferase family protein
1	31950.c0.g1.i3	323.43	27.45	3.25	2.98	-2.76033	0.000208759	-3.56127	2.61e-06	0.0908157	1					EFH47666.1	93.714	2.27e-102	AT5G10160.1	93.143	1.06e-103	Thioesterase superfamily protein
1	31958.c0.g1.i1	117.35	1.64	0.11	0.01	-5.3166	1.32e-09	-4.24922	2.06e-05	-2.17712	1	BBE23_ARATH	85.338	0	Berberine bridge enzyme-like 23 {ECO:0000303|PubMed:26037923}	XP_010494448.1	88.665	0	AT5G44360.2	85.61	0	FAD-binding Berberine family protein
1	31959.c0.g1.i1	16.89	0	0	0.08	-9.88337	5.98e-11	5.13e-15	1	2.77802	1					KFK27053.1	96.85	6.65e-83	AT5G54400.1	95.312	3.01e-84	S-adenosyl-L-methionine-dependent methyltransferases superfamily protein				ENOG4111J7E	ath:AT3G06960
1	31965.c1.g3.i3	69.02	27.81	1.42	0.14	-0.330354	1	-4.67151	2.22e-05	-2.8927	1					XP_013641510.1	90.173	3.81e-112	AT1G15380.2	88.304	2.06e-111	Lactoylglutathione lyase / glyoxalase I family protein						GO:0003674,GO:0003824,GO:0005575,GO:0005794,GO:0008150,GO:0008374,GO:0009987,GO:0016021,GO:0016407,GO:0016413,GO:0016740,GO:0016746,GO:0016747,GO:0031224,GO:0043226,GO:0043227,GO:0043229,GO:0043231,GO:0044424,GO:0044425,GO:0044444,GO:0044464,GO:0071554
1	31975.c0.g2.i1	25.96	3.42	8.83	10.88	-1.93222	0.0347437	0.790489	1	0.564469	1	CALM5_ARATH	100	6.52e-17	Calmodulin-5	XP_018479793.1	97.297	1.01e-15	AT3G43810.4	97.368	4.47e-17	calmodulin 7
1	31975.c0.g3.i1	77.76	6.88	21.64	29.65	-2.5945	0.00463244	1.12447	0.961755	0.656227	1	CALM5_ARATH	98.864	4.94e-58	Calmodulin-5	OAP10206.1	98.864	2.9e-56	AT3G56800.1	98.876	3.64e-58	calmodulin 3
1	31976.c5.g1.i1	118.65	6.5	0	0	-3.14173	0.0294342	-4.62635	0.456905	0	1	CDA1_ARATH	79.167	2.62e-22	Cytidine deaminase 1	ESQ50488.1	84.444	5.92e-21	AT2G19570.1	79.167	3.54e-22	cytidine deaminase 1	PF07651.15			ENOG410XNU9	ath:AT5G58230`KO:K10752
1	31981.c0.g2.i1	11.31	0.57	0	0	-3.41476	0.000213714	-6.39041	0.00492682	0	1	COL6_ARATH	75.616	0	Zinc finger protein CONSTANS-LIKE 6	XP_010415472.1	72.471	0	AT1G68520.1	75.676	0	B-box type zinc finger protein with CCT domain-containing protein				COG2214	ath:AT1G76700	GO:0000166,GO:0003674,GO:0005215,GO:0005488,GO:0005524,GO:0005575,GO:0005774,GO:0006810,GO:0008150,GO:0008509,GO:0008514,GO:0009705,GO:0015075,GO:0016020,GO:0016021,GO:0017076,GO:0022857,GO:0022891,GO:0022892,GO:0030554,GO:0031090,GO:0031224,GO:0032553,GO:0032555,GO:0032559,GO:0035639,GO:0036094,GO:0043167,GO:0043168,GO:0044422,GO:0044424,GO:0044425,GO:0044437,GO:0044444,GO:0044446,GO:0044464,GO:…
1	31981.c0.g3.i2	23.46	0.39	0	0.06	-4.95012	4.83e-11	-6.0483	0.00495257	3.29327	1	COL16_ARATH	80.048	0	Zinc finger protein CONSTANS-LIKE 16	OAP19666.1	80.285	0	AT1G25440.1	80.095	0	B-box type zinc finger protein with CCT domain-containing protein
1	31986.c1.g1.i3	14.36	1.28	3.44	4.82	-2.54933	7.13e-05	0.835067	0.963624	0.859399	1	RPOB_CAPBU	99.516	0	DNA-directed RNA polymerase subunit beta {ECO:0000255|HAMAP-Rule:MF_01321}	BAW02978.1	99.71	0	ATCG00190.1	99.42	0	RNA polymerase subunit beta
1	31986.c1.g6.i1	113.74	10.54	11.13	10.32	-2.47571	0.00814137	-0.549379	1	0.201457	1	PETN_ILLOL	96.774	6.24e-11	Cytochrome b6-f complex subunit 8 {ECO:0000255|HAMAP-Rule:MF_00395}	EFH64612.1	66.292	4.07e-26	ATCG00210.1	100	4.12e-10	electron transporter transferring electrons within cytochrome b6/f complex of photosystem II	PF00004.28					GO:0000166,GO:0002218,GO:0002221,GO:0002253,GO:0002376,GO:0002682,GO:0002684,GO:0002757,GO:0002758,GO:0002764,GO:0003674,GO:0003824,GO:0004672,GO:0004674,GO:0004675,GO:0004871,GO:0004872,GO:0004888,GO:0005488,GO:0005524,GO:0005575,GO:0005886,GO:0006464,GO:0006468,GO:0006793,GO:0006796,GO:0006807,GO:0006950,GO:0006952,GO:0007165,GO:0007166,GO:0008150,GO:0008152,GO:0009605,GO:0009607,GO:0009617,GO:…
1	31993.c0.g1.i1	50.56	0	5.4	10.88	-6.75317	0.00157496	3.64588	1	1.22469	1	SAHH1_ARATH	100	5.75e-50	Adenosylhomocysteinase 1	ESQ56297.1	98.684	2.64e-50	AT4G13940.4	100	1.09e-50	S-adenosyl-L-homocysteine hydrolase						GO:0000166,GO:0003674,GO:0003824,GO:0005488,GO:0005524,GO:0005575,GO:0016021,GO:0016787,GO:0016817,GO:0016818,GO:0017076,GO:0030554,GO:0031224,GO:0032553,GO:0032555,GO:0032559,GO:0035639,GO:0036094,GO:0043167,GO:0043168,GO:0044425,GO:0097159,GO:0097367,GO:0102485,GO:0102486,GO:0102487,GO:0102488,GO:0102489,GO:0102490,GO:0102491,GO:1901265,GO:1901363
1	31993.c0.g2.i4	29.36	1.04	0.56	0.77	-3.90349	4.3e-05	-1.31788	1	0.714796	1	SAHH1_ARATH	96.97	0	Adenosylhomocysteinase 1	EFH59720.1	98.347	0	AT4G13940.1	96.97	0	S-adenosyl-L-homocysteine hydrolase	PF14111.5
1	31996.c0.g1.i2	80	26.05	10.05	10.43	-0.695595	0.994371	-1.90455	0.013701	0.279104	1	ADF3_ARATH	86.667	1.64e-64	Actin-depolymerizing factor 3	XP_010455704.1	88.889	1.5e-63	AT5G59880.1	86.667	2.25e-64	actin depolymerizing factor 3				COG3569	ath:AT5G55310`KO:K03163
1	31998.c0.g1.i3	6.24	0.36	0.34	0.1	-3.06943	0.0140195	-0.536964	1	-1.37384	1	ATL67_ARATH	72.816	7.79e-69	RING-H2 finger protein ATL67	EOA27826.1	76.995	3.52e-78	AT2G46160.2	72.816	1.07e-68	RING/U-box superfamily protein				ENOG4111TR4	ath:AT5G67590`KO:K03937	GO:0000156,GO:0000160,GO:0003674,GO:0003824,GO:0004721,GO:0004871,GO:0005575,GO:0005634,GO:0005737,GO:0006139,GO:0006351,GO:0006355,GO:0006725,GO:0006807,GO:0007165,GO:0008150,GO:0008152,GO:0009058,GO:0009059,GO:0009736,GO:0009755,GO:0009889,GO:0009987,GO:0010468,GO:0010556,GO:0016070,GO:0016787,GO:0016788,GO:0016791,GO:0018130,GO:0019219,GO:0019222,GO:0019438,GO:0031323,GO:0031326,GO:0032774,GO:…
1	31999.c0.g1.i4	77.71	0.62	0.18	0	-6.14563	4.81e-11	-2.21685	0.185654	-4.65939	1	TAT1_ARATH	89.31	0	Probable aminotransferase TAT1	EFH45763.1	90.646	0	AT4G28420.2	89.333	0	Tyrosine transaminase family protein				ENOG410XW3C	ath:AT1G03080	GO:0003674,GO:0005198,GO:0005488,GO:0005543,GO:0005575,GO:0005635,GO:0005829,GO:0006405,GO:0006606,GO:0006611,GO:0006810,GO:0006886,GO:0006913,GO:0008104,GO:0008150,GO:0008289,GO:0009966,GO:0009968,GO:0010646,GO:0010648,GO:0010928,GO:0010930,GO:0015031,GO:0015833,GO:0015931,GO:0017038,GO:0017056,GO:0023051,GO:0023057,GO:0031967,GO:0031975,GO:0032991,GO:0033036,GO:0033365,GO:0034399,GO:0034504,GO:…
1	32000.c0.g1.i5	13.99	4.57	1.84	1.46	-0.711121	0.970968	-1.83339	0.0254133	-0.0601425	1	TIF4B_ARATH	85.771	1.03e-150	Protein TIFY 4B	AKN91691.1	87.649	4.96e-154	AT4G14720.1	85.771	1.42e-150	TIFY domain/Divergent CCT motif family protein	PF03522.14
1	32007.c0.g1.i2	19.97	0.26	0.64	0.81	-5.35633	2.54e-10	0.800722	1	0.587638	1	Y3172_ARATH	83.173	7.4e-178	WEB family protein At3g51720	EFH52359.1	84.487	0	AT3G51720.1	83.173	1.02e-177	WEB family protein (DUF827)						GO:0000166,GO:0003674,GO:0003824,GO:0004672,GO:0004674,GO:0005488,GO:0005524,GO:0005575,GO:0005886,GO:0006464,GO:0006468,GO:0006793,GO:0006796,GO:0006807,GO:0007165,GO:0007166,GO:0008150,GO:0008152,GO:0009987,GO:0016020,GO:0016021,GO:0016301,GO:0016310,GO:0016740,GO:0016772,GO:0016773,GO:0017076,GO:0019538,GO:0030554,GO:0031224,GO:0032553,GO:0032555,GO:0032559,GO:0035639,GO:0036094,GO:0036211,GO:…
1	32007.c1.g3.i1	9.61	4.9	0.96	0.8	-0.0694794	1	-2.86829	0.000568787	-0.0672136	1	ERF55_ARATH	67.424	2.75e-37	Ethylene-responsive transcription factor ERF055	XP_020870094.1	70.992	5.62e-38	AT1G36060.1	67.424	3.75e-37	Integrase-type DNA-binding superfamily protein
1	32007.c1.g4.i1	74.43	13.51	0.93	1.94	-1.53213	0.195902	-4.28542	0.000162267	1.19291	1	ERF55_ARATH	80	4.53e-39	Ethylene-responsive transcription factor ERF055	XP_010500063.1	85	6.95e-47	AT1G36060.1	80	6.18e-39	Integrase-type DNA-binding superfamily protein
1	32017.c0.g1.i1	25.3	8.52	0.09	0	-0.709299	1	-6.87548	2.74e-07	-3.05078	1	PIP24_ARATH	94.7	3.14e-179	Probable aquaporin PIP2-4	EOA13781.1	96.154	0	AT5G60660.1	94.7	4.34e-179	plasma membrane intrinsic protein 2;4			ExpAA=46.72^PredHel=2^Topology=i7-29o97-119i	COG5594	ath:AT1G11960`KO:K21989	GO:0000375,GO:0000377,GO:0000390,GO:0000398,GO:0003674,GO:0003676,GO:0003677,GO:0005488,GO:0005575,GO:0005681,GO:0005684,GO:0006139,GO:0006396,GO:0006397,GO:0006725,GO:0006807,GO:0008150,GO:0008152,GO:0008380,GO:0009987,GO:0016043,GO:0016070,GO:0016071,GO:0022411,GO:0030529,GO:0031974,GO:0031981,GO:0032984,GO:0032988,GO:0032991,GO:0034641,GO:0042752,GO:0043021,GO:0043170,GO:0043233,GO:0043933,GO:…
1	32017.c2.g2.i2	291.35	139.16	16.41	14.05	-0.257906	1	-3.61652	5.91e-09	0.00872091	1	PIP27_ARATH	95.152	3.67e-113	Aquaporin PIP2-7	CDY52648.1	95.783	4.77e-111	AT4G35100.2	95.152	5.07e-113	plasma membrane intrinsic protein 3	PF00528.21
1	32017.c3.g1.i1	138.39	19.07	7.57	6.27	-1.92364	0.0315302	-1.80982	0.0308044	-0.0124609	1	PIP15_ARATH	97.191	1.83e-111	Probable aquaporin PIP1-5	EOA17147.1	97.753	1.3e-110	AT4G23400.1	97.207	1.84e-111	plasma membrane intrinsic protein 1;5	PF13966.5
1	32019.c1.g3.i2	20.53	3.65	14.26	11	-1.59907	0.0267057	1.40976	0.0559975	-0.0730958	1	DRB2_ARATH	73.651	2.07e-109	Double-stranded RNA-binding protein 2	EFH55359.1	75.884	8.78e-114	AT2G28380.1	73.734	3.63e-109	dsRNA-binding protein 2
1	32020.c0.g1.i2	14.31	0.12	0	0.14	-5.65174	9.67e-06	-2.01627	1	1.97146	1	RGP1_ARATH	95	1.01e-48	UDP-arabinopyranose mutase 1 {ECO:0000305}	XP_018433954.1	97.5	1.11e-46	AT3G02230.1	95	1.38e-48	reversibly glycosylated polypeptide 1
1	32020.c0.g3.i2	106.68	6.32	2.67	4.78	-3.22515	1.11e-05	-1.74021	0.137362	1.05259	1	RGP1_ARATH	95.714	1.25e-97	UDP-arabinopyranose mutase 1 {ECO:0000305}	XP_010417228.2	99.275	4.81e-98	AT3G02230.1	95.714	1.72e-97	reversibly glycosylated polypeptide 1				COG5099	ath:AT3G10360`KO:K17943
1	32024.c0.g1.i1	22.08	11.25	1.58	1.44	-0.198728	1	-3.24815	0.000957352	0.0751411	1	IX15L_ARATH	91.346	0	Protein IRX15-LIKE	EFH42972.1	91.987	0	AT5G67210.1	91.346	0	IRREGULAR XYLEM protein (DUF579)
1	32025.c0.g1.i1	238.22	79.04	16.45	7.89	-0.78908	1	-2.63571	0.0458474	-0.764426	1	AROF_SOLTU	93.59	5.49e-50	Phospho-2-dehydro-3-deoxyheptonate aldolase 1, chloroplastic	ABR25745.1	92.308	1.16e-49	AT1G22410.1	97.436	4.74e-50	Class-II DAHP synthetase family protein
1	32029.c0.g1.i2	30.35	1.94	4.71	4.42	-3.07488	2.13e-05	0.780936	1	0.204475	1	PHS2_ARATH	95.482	0	Alpha-glucan phosphorylase 2, cytosolic	XP_019084786.1	96.314	0	AT3G46970.1	95.487	0	alpha-glucan phosphorylase 2	PF14223.5
1	32039.c0.g1.i4	73.14	6.03	1.17	1.12	-2.77407	0.00505569	-2.77873	0.0242276	0.141543	1	ERD15_ARATH	75.439	1.87e-36	Protein EARLY RESPONSIVE TO DEHYDRATION 15	EFH56189.1	79.646	3.05e-39	AT2G41430.3	74.79	1.15e-37	dehydration-induced protein (ERD15)				COG0509	osa:4349114`KO:K02437
1	32046.c0.g1.i4	220.07	38.85	26.54	39.37	-1.60907	0.0476942	-1.1035	0.288225	0.81932	1					EFH45666.1	93.714	5.75e-92	AT4G29870.1	90.909	6.03e-91	Oligosaccharyltransferase complex/magnesium transporter family protein
1	32053.c1.g1.i1	30.71	3.78	0.06	0.03	-2.31478	0.0389125	-6.20823	3.6e-07	-0.569929	1	PER31_ARATH	87.291	0	Peroxidase 31	XP_010514527.1	89.967	0	AT3G28200.1	87.333	0	Peroxidase superfamily protein						GO:0000139,GO:0005575,GO:0008150,GO:0009605,GO:0009607,GO:0009624,GO:0010008,GO:0016020,GO:0016021,GO:0031090,GO:0031224,GO:0043207,GO:0044422,GO:0044424,GO:0044425,GO:0044431,GO:0044433,GO:0044440,GO:0044444,GO:0044446,GO:0044464,GO:0050896,GO:0051704,GO:0051707,GO:0098588,GO:0098805
1	32053.c2.g1.i5	23.3	1.79	1.11	0.59	-2.87764	0.00113007	-1.19884	0.750697	-0.555703	1	PER63_ARATH	92.857	0	Peroxidase 63	XP_010435940.1	91.331	0	AT5G40150.1	92.88	0	Peroxidase superfamily protein	PF00512.24
1	32053.c2.g4.i1	34.05	0.56	0	0	-4.93845	0.000150312	-5.80293	0.0673232	0	1	PER45_ARATH	91.385	0	Peroxidase 45	EOA17003.1	94.462	0	AT4G30170.1	91.385	0	Peroxidase family protein				COG1562	ath:AT5G17230`KO:K02291
1	32054.c0.g2.i2	4.88	0.05	0	0.01	-5.3282	1.22e-06	-3.76928	0.835373	2.01365	1	BEL1_ARATH	78.63	0	Homeobox protein BEL1 homolog	EFH46895.1	80.757	0	AT5G41410.1	78.664	0	POX (plant homeobox) family protein
1	32059.c2.g2.i1	140.03	13.66	5.91	4.53	-2.43882	0.00223404	-1.76228	0.366499	-0.174968	1	ENPL_ARATH	97.753	7.66e-54	Endoplasmin homolog {ECO:0000305}	AAB63606.1	97.753	5.4e-55	AT4G24190.2	97.753	9.11e-54	Chaperone protein htpG family protein
1	32060.c0.g1.i5	17.83	0.29	0.36	0.32	-5.06652	7.37e-10	-0.211426	1	0.112988	1	JASON_ARATH	82.077	0	Protein JASON {ECO:0000305}	EFH68611.1	84.521	0	AT1G06660.1	82.114	0	aspartyl/glutamyl-tRNA(Asn/Gln) amidotransferase subunit
1	32063.c0.g2.i2	425.78	46.55	33.72	33.4	-2.39157	0.00377867	-0.974034	0.557788	0.252561	1	RS113_ARATH	96.226	3.38e-101	40S ribosomal protein S11-3	XP_010493497.1	98.742	4.11e-100	AT5G23740.1	96.25	3.4e-101	ribosomal protein S11-beta						GO:0000243,GO:0000375,GO:0000377,GO:0000398,GO:0003674,GO:0003676,GO:0003723,GO:0003727,GO:0005488,GO:0005575,GO:0005634,GO:0005681,GO:0005684,GO:0006139,GO:0006396,GO:0006397,GO:0006725,GO:0006807,GO:0006950,GO:0006952,GO:0008150,GO:0008152,GO:0008187,GO:0008380,GO:0009605,GO:0009607,GO:0009617,GO:0009987,GO:0016070,GO:0016071,GO:0016604,GO:0016607,GO:0030529,GO:0030628,GO:0032991,GO:0034641,GO:…
1	32067.c2.g3.i1	72.78	41.29	14.11	10.91	0.0425266	1	-2.06671	0.0062756	-0.146001	1	SRG1_ARATH	73.585	1.72e-57	Protein SRG1	EOA17227.1	92.381	2.34e-67	AT4G25300.1	91.429	3.76e-68	2-oxoglutarate (2OG) and Fe(II)-dependent oxygenase superfamily protein
1	32072.c5.g1.i1	1677.17	182.27	2.24	2.9	-2.43168	0.00153065	-6.79582	6.11e-15	0.564997	1	PRF1_SOLLC	70.115	2.94e-22	36.4 kDa proline-rich protein	XP_010430304.1	100	2.06e-48	AT1G62500.1	98.901	3.51e-50	Bifunctional inhibitor/lipid-transfer protein/seed storage 2S albumin superfamily protein			ExpAA=24.39^PredHel=1^Topology=i7-29o	COG0515	ath:AT2G01210	GO:0000166,GO:0003674,GO:0005488,GO:0005524,GO:0006950,GO:0006952,GO:0007165,GO:0008150,GO:0009605,GO:0009607,GO:0009620,GO:0009987,GO:0017076,GO:0030554,GO:0032553,GO:0032555,GO:0032559,GO:0035639,GO:0036094,GO:0043167,GO:0043168,GO:0043207,GO:0043531,GO:0050789,GO:0050794,GO:0050832,GO:0050896,GO:0051704,GO:0051707,GO:0065007,GO:0097159,GO:0097367,GO:0098542,GO:1901265,GO:1901363
1	32072.c5.g3.i6	57.58	17.76	1.84	1.67	-0.803416	0.961003	-3.70904	2.42e-06	0.0642952	1	WTR18_ARATH	92.908	0	WAT1-related protein At3g28050	Q94JU2.1	92.908	0	AT3G28050.1	92.933	0	nodulin MtN21 /EamA-like transporter family protein
1	32080.c0.g1.i1	8.8	1.89	0.22	0	-1.30237	0.217505	-3.61377	9.36e-05	-4.16821	1	LOGLA_ORYSJ	28.249	8.25e-08	Probable cytokinin riboside 5'-monophosphate phosphoribohydrolase LOGL10	XP_010479517.1	90.066	0	AT1G50575.1	87.625	0	Putative lysine decarboxylase family protein	PF07059.11
1	32081.c0.g1.i2	70.18	4.45	5.83	5.34	-3.06929	3.72e-05	-0.142084	1	0.116114	1					XP_010483506.1	75.207	2.74e-41	AT5G58930.1	77.778	1.51e-40	hypothetical protein (DUF740)
1	32085.c1.g1.i3	257.53	57.84	25.3	22.11	-1.29443	0.111637	-1.71136	0.00810939	0.0319826	1	HIP7_ARATH	90.909	7.06e-37	Heavy metal-associated isoprenylated plant protein 7 {ECO:0000303|PubMed:21072340, ECO:0000303|PubMed:23368984}	XP_022571128.1	90	8.14e-37	AT5G63530.2	90.909	6.36e-37	farnesylated protein 3
1	32090.c1.g2.i6	57.85	10.57	23.65	21.94	-1.57304	0.0476316	0.599505	1	0.163153	1	MORF3_ARATH	89.062	1.04e-70	Multiple organellar RNA editing factor 3, mitochondrial {ECO:0000305}	XP_010464270.1	92.969	5.67e-73	AT3G06790.2	89.062	1.44e-70	plastid developmental protein DAG
1	32098.c0.g1.i4	8.92	2.71	0.62	0.49	-0.867976	0.836533	-2.55534	0.0127106	-0.172056	1	PA71H_ARATH	92.669	0	Protein PAM71-homolog, chloroplastic {ECO:0000303|PubMed:27020959}	Q9T0H9.2	92.669	0	AT4G13590.1	92.669	0	Uncharacterized protein family (UPF0016)
1	32099.c0.g1.i3	15.33	4.83	1.05	0.8	-0.800148	1	-2.71041	0.00872531	-0.156594	1					CAA17153.1	66.272	7.12e-62	AT4G21865.1	76.154	5.77e-60	hypothetical protein
1	32107.c0.g1.i2	22.66	1.72	1.97	0.83	-2.82237	0.00111536	-0.338353	1	-0.99683	1					ESQ53186.1	88.542	2.89e-48	AT4G39300.2	88.66	1.26e-49	envelope glycoprotein
1	32108.c0.g1.i3	12.49	1.38	0.21	0.11	-2.22811	0.144752	-3.25536	0.0246444	-0.4176	1	LBD36_ARATH	82.5	2.03e-137	LOB domain-containing protein 36	XP_023637410.1	91.713	0	AT5G06610.1	89.532	0	lipase (DUF620)
1	32111.c0.g1.i4	415.62	10.13	0.32	0.74	-4.61893	1.72e-07	-5.40722	2.71e-06	1.45627	1	GSTU6_ARATH	90.625	9.16e-146	Glutathione S-transferase U6	ABW74578.1	91.071	8.54e-146	AT2G29440.1	90.667	4.29e-146	glutathione S-transferase tau 6				ENOG410YCJJ	ath:AT1G32640`KO:K13422	GO:0003674,GO:0003676,GO:0003723,GO:0003729,GO:0003743,GO:0005488,GO:0005515,GO:0005575,GO:0005634,GO:0005829,GO:0005852,GO:0006413,GO:0008135,GO:0008150,GO:0008152,GO:0009987,GO:0031369,GO:0032991,GO:0043226,GO:0043227,GO:0043229,GO:0043231,GO:0043234,GO:0044237,GO:0044424,GO:0044444,GO:0044464,GO:0097159,GO:1901363
1	32118.c1.g2.i3	8.77	0	0.09	0.05	-8.58281	2.5e-07	2.48652	1	-0.569935	1	GLGL1_ARATH	97.129	1.51e-146	Glucose-1-phosphate adenylyltransferase large subunit 1, chloroplastic	EFH50197.1	99.043	3.32e-146	AT5G19220.1	97.129	2.08e-146	ADP glucose pyrophosphorylase large subunit 1						GO:0000160,GO:0003674,GO:0004871,GO:0005488,GO:0005515,GO:0005575,GO:0005634,GO:0005737,GO:0005829,GO:0006793,GO:0006796,GO:0007165,GO:0008150,GO:0008152,GO:0009719,GO:0009725,GO:0009735,GO:0009736,GO:0009755,GO:0009888,GO:0009987,GO:0010033,GO:0010087,GO:0010089,GO:0016310,GO:0019899,GO:0019900,GO:0019901,GO:0032502,GO:0035556,GO:0042221,GO:0043226,GO:0043227,GO:0043229,GO:0043231,GO:0043424,GO:…
1	32119.c0.g1.i4	9.41	2.47	0.02	0	-1.14602	0.82533	-6.70473	2.18e-05	-1.77623	1	GLN12_ARATH	98.268	0	Glutamine synthetase cytosolic isozyme 1-2	EFH64747.1	98.701	0	AT1G66200.3	98.276	0	hypothetical protein				COG5224	ath:AT3G05690`KO:K08064	GO:0003674,GO:0003824,GO:0004842,GO:0005488,GO:0005515,GO:0005575,GO:0005634,GO:0005737,GO:0016740,GO:0019787,GO:0043226,GO:0043227,GO:0043229,GO:0043231,GO:0044424,GO:0044464
1	32130.c1.g1.i5	44.23	0.11	0.06	0.13	-7.67607	1.05e-09	-1.11453	1	1.00239	1	NLTP1_ARATH	80.508	9.62e-63	Non-specific lipid-transfer protein 1	EOA28150.1	85.593	5.9e-66	AT2G38540.1	80.672	9.66e-63	lipid transfer protein 1	PF03600.15					GO:0000166,GO:0003674,GO:0005488,GO:0005524,GO:0005575,GO:0009532,GO:0009570,GO:0017076,GO:0030554,GO:0032553,GO:0032555,GO:0032559,GO:0035639,GO:0036094,GO:0043167,GO:0043168,GO:0044422,GO:0044424,GO:0044434,GO:0044435,GO:0044444,GO:0044446,GO:0044464,GO:0097159,GO:0097367,GO:1901265,GO:1901363
1	32133.c0.g1.i6	25.55	19.58	5.64	4.73	0.574647	1	-2.35131	0.000465693	-0.0525366	1	Y1222_ARATH	84.146	0	Uncharacterized protein At1g32220, chloroplastic	EFH67231.1	85.015	0	AT1G32220.1	84.195	0	NAD(P)-binding Rossmann-fold superfamily protein
1	32134.c1.g1.i1	118.46	6.31	13.66	7.85	-3.05662	0.00123067	0.433248	1	-0.5831	1	CYT5_ARATH	76.471	3.6e-52	Cysteine proteinase inhibitor 5	EFH39596.1	82.353	1.47e-54	AT5G47550.1	76.699	3.5e-52	Cystatin/monellin superfamily protein
1	32141.c1.g2.i1	144.42	6.63	0	0.14	-3.64443	0.00301263	-8.2708	0.000337147	2.79714	1	NEET_ARATH	79.817	3.41e-56	CDGSH iron-sulfur domain-containing protein NEET	EFH40382.1	79.817	1.71e-55	AT5G51720.1	80	3.42e-56	2 iron 2 sulfur cluster binding protein						GO:0003674,GO:0005488,GO:0005515,GO:0005575,GO:0005874,GO:0008017,GO:0008092,GO:0015631,GO:0044422,GO:0044424,GO:0044430,GO:0044446,GO:0044464,GO:0099080,GO:0099081,GO:0099512,GO:0099513
1	32148.c1.g5.i2	55.83	0.05	0	0.14	-9.1047	1.84e-16	-2.2267	1	3.30456	1	GCSH3_ARATH	95.181	9.72e-97	Glycine cleavage system H protein 3, mitochondrial	Q9LQL0.1	95.181	1.62e-94	AT1G32470.1	95.21	7.52e-97	Single hybrid motif superfamily protein	PF04841.12					GO:0003674,GO:0003824,GO:0005575,GO:0005777,GO:0005975,GO:0006081,GO:0006082,GO:0006097,GO:0006099,GO:0006101,GO:0008150,GO:0008152,GO:0009514,GO:0009987,GO:0016740,GO:0016746,GO:0019752,GO:0032787,GO:0042579,GO:0043226,GO:0043227,GO:0043229,GO:0043231,GO:0043436,GO:0044237,GO:0044238,GO:0044262,GO:0044281,GO:0044424,GO:0044444,GO:0044464,GO:0044699,GO:0044710,GO:0044723,GO:0044763,GO:0046487,GO:…
1	32156.c0.g2.i6	19.85	0.07	0	0.09	-6.98015	9.09e-11	-2.81708	1	2.7816	1	LOL1_ARATH	91.538	1.23e-78	Protein LOL1	XP_018486322.1	93.077	3.52e-77	AT1G32540.3	91.603	5.84e-79	lsd one like 1						GO:0000922,GO:0003674,GO:0005488,GO:0005515,GO:0005575,GO:0005634,GO:0005815,GO:0005819,GO:0005874,GO:0005881,GO:0007049,GO:0008017,GO:0008092,GO:0008150,GO:0009524,GO:0009605,GO:0009606,GO:0009612,GO:0009628,GO:0009629,GO:0009630,GO:0009652,GO:0009958,GO:0009987,GO:0010005,GO:0015631,GO:0043226,GO:0043227,GO:0043228,GO:0043229,GO:0043231,GO:0043232,GO:0044422,GO:0044424,GO:0044430,GO:0044444,GO:…
1	32162.c0.g1.i2	15.86	0.04	0.04	0	-7.39443	1.21e-11	-0.299781	1	-1.7761	1	LSH10_ARATH	96.875	6.15e-105	Protein LIGHT-DEPENDENT SHORT HYPOCOTYLS 10	XP_010506094.1	96.875	4.15e-105	AT2G42610.2	96.875	8.5e-105	LIGHT-DEPENDENT SHORT HYPOCOTYLS-like protein (DUF640)						GO:0005575,GO:0005634,GO:0006139,GO:0006259,GO:0006281,GO:0006725,GO:0006807,GO:0006950,GO:0006974,GO:0008150,GO:0008152,GO:0009314,GO:0009411,GO:0009416,GO:0009628,GO:0009987,GO:0010224,GO:0033554,GO:0034641,GO:0043170,GO:0043226,GO:0043227,GO:0043229,GO:0043231,GO:0044237,GO:0044238,GO:0044260,GO:0044424,GO:0044464,GO:0046483,GO:0050896,GO:0051716,GO:0071704,GO:0090304,GO:1901360
1	32162.c1.g1.i1	24.61	2.88	0.05	0.03	-2.3797	0.0412277	-5.96873	1.78e-07	-0.568001	1	ACCO1_ARATH	88.235	5.04e-129	1-aminocyclopropane-1-carboxylate oxidase 1	KFK40326.1	85.787	1.01e-154	AT2G19590.2	88.235	6.18e-129	ACC oxidase 1			ExpAA=22.67^PredHel=1^Topology=o20-42i			GO:0000166,GO:0003674,GO:0003824,GO:0004672,GO:0004674,GO:0004675,GO:0004871,GO:0004872,GO:0004888,GO:0005488,GO:0005524,GO:0005575,GO:0005634,GO:0005737,GO:0005886,GO:0006464,GO:0006468,GO:0006793,GO:0006796,GO:0006807,GO:0006950,GO:0006952,GO:0007165,GO:0007166,GO:0008150,GO:0008152,GO:0009987,GO:0016020,GO:0016301,GO:0016310,GO:0016740,GO:0016772,GO:0016773,GO:0017076,GO:0019199,GO:0019538,GO:…
1	32162.c2.g1.i2	42.11	3.11	2.61	2.5	-2.73647	0.0148894	-0.762284	1	0.176274	1	LSH6_ARATH	74.39	2.64e-78	Protein LIGHT-DEPENDENT SHORT HYPOCOTYLS 6	EFH38995.1	85.976	1.31e-91	AT1G07090.1	74.39	3.64e-78	LIGHT-DEPENDENT SHORT HYPOCOTYLS-like protein (DUF640)
1	32172.c4.g1.i1	20.18	1.61	0.1	0.11	-2.71519	0.00572977	-4.05293	0.103462	0.198836	1	E13B_WHEAT	56.338	1.77e-20	Glucan endo-1,3-beta-glucosidase	AAT41741.1	88	9.52e-43	AT2G43670.1	88	7.85e-45	Carbohydrate-binding X8 domain superfamily protein
1	32174.c0.g1.i1	9.02	1.44	2.84	1.23	-1.69983	0.0330624	0.41891	1	-0.934617	1	IPT9_ARATH	81.557	0	tRNA dimethylallyltransferase 9	EFH50238.1	83.607	0	AT5G20040.1	81.633	0	isopentenyltransferase 9
1	32176.c1.g2.i1	10.13	0	0.2	0.14	-9.34107	2.08e-09	3.89149	0.979139	-0.270518	1					XP_020870433.1	70.632	9.51e-92	AT1G11125.1	68.148	7.3e-90	hypothetical protein				COG0240	ath:AT2G40690`KO:K00006
1	32177.c1.g1.i5	14.9	0.46	0.05	0	-4.01103	0.0169091	-3.53611	0.562613	-1.77846	1	GDU1_ARATH	78.846	5.17e-61	Protein GLUTAMINE DUMPER 1	XP_010432824.1	85.294	1.65e-59	AT4G31730.1	78.846	7.13e-61	glutamine dumper 1
1	32180.c1.g1.i1	13.07	0.26	2.57	0.88	-4.42898	0.0133557	2.40195	0.835585	-1.2082	1	URGT3_ARATH	97.561	2.92e-17	UDP-rhamnose/UDP-galactose transporter 3 {ECO:0000312|EMBL:AKA88216.1}	ESQ44844.1	100	8.44e-17	AT5G42420.2	97.561	2.56e-17	Nucleotide-sugar transporter family protein
1	32183.c0.g1.i1	10.02	3.81	0	0.02	-0.659329	1	-9.1559	3.76e-07	1.97713	1	GUN23_ARATH	86.004	0	Endoglucanase 23	OAP01200.1	86.41	0	AT4G39000.1	86.032	0	glycosyl hydrolase 9B17						GO:0001071,GO:0003674,GO:0003676,GO:0003700,GO:0005488,GO:0005575,GO:0005634,GO:0006139,GO:0006351,GO:0006355,GO:0006725,GO:0006807,GO:0007275,GO:0008150,GO:0008152,GO:0009058,GO:0009059,GO:0009889,GO:0009987,GO:0010468,GO:0010556,GO:0016070,GO:0018130,GO:0019219,GO:0019222,GO:0019438,GO:0031323,GO:0031326,GO:0032501,GO:0032502,GO:0032774,GO:0034641,GO:0034645,GO:0034654,GO:0040008,GO:0043167,GO:…
1	32187.c0.g1.i5	19.11	2.08	0.61	0.76	-2.3112	0.00582265	-2.29568	0.0240052	0.670225	1	SUS1_ARATH	93.688	0	Sucrose synthase 1	EFH50275.1	94.183	0	AT5G20830.3	93.696	0	sucrose synthase 1
1	32189.c1.g2.i3	1680.75	318.26	1.05	0.69	-1.51728	0.556605	-8.60352	2.07e-08	-0.40115	1	RGP4_ARATH	90.643	2.03e-103	Probable UDP-arabinopyranose mutase 4 {ECO:0000305}	XP_023633505.1	85.405	2.11e-103	AT5G50750.1	90.173	2.62e-103	reversibly glycosylated polypeptide 4						GO:0003674,GO:0003676,GO:0003824,GO:0003964,GO:0004175,GO:0004190,GO:0004518,GO:0004519,GO:0005488,GO:0006139,GO:0006259,GO:0006725,GO:0006807,GO:0008150,GO:0008152,GO:0008233,GO:0008270,GO:0009987,GO:0015074,GO:0016740,GO:0016772,GO:0016779,GO:0016787,GO:0016788,GO:0034061,GO:0034641,GO:0043167,GO:0043169,GO:0043170,GO:0044237,GO:0044238,GO:0044260,GO:0046483,GO:0046872,GO:0046914,GO:0070001,GO:…
1	32189.c2.g3.i2	18.98	2.18	10.95	9.52	-2.15491	0.0150674	1.72303	0.0794741	0.0546369	1	RGP1_ARATH	97.619	6.39e-121	UDP-arabinopyranose mutase 1 {ECO:0000305}	EOA30904.1	97.619	6.17e-119	AT3G02230.1	97.619	8.81e-121	reversibly glycosylated polypeptide 1
1	32191.c0.g1.i1	406.84	1.82	9.32	3.52	-6.86188	1.15e-10	1.71247	1	-1.15488	1					ONI33108.1	85.455	1.31e-15	AT2G06520.1	91.071	2.23e-17	photosystem II subunit X	PF03735.13					GO:0003674,GO:0003824,GO:0005575,GO:0005576,GO:0006508,GO:0006807,GO:0008150,GO:0008152,GO:0008374,GO:0016740,GO:0016746,GO:0016747,GO:0016752,GO:0016753,GO:0019538,GO:0019748,GO:0043170,GO:0044238,GO:0044699,GO:0044710,GO:0047202,GO:0071704,GO:1901564
1	32201.c0.g1.i1	62.77	3.51	0.72	0.63	-3.35964	2.51e-05	-2.73965	0.0182162	0.0917523	1					XP_020891092.1	96.063	0	AT5G44730.2	93.75	4.86e-179	Haloacid dehalogenase-like hydrolase (HAD) superfamily protein
1	32202.c0.g1.i4	44.97	0.82	0.18	0.12	-4.96167	8.98e-11	-2.62171	0.0360069	-0.34863	1	HXKL1_ARATH	86.815	0	Hexokinase-like 1 protein	EOA36863.1	86.255	0	AT1G47840.1	86.842	0	hexokinase 3
1	32207.c2.g1.i1	5.83	0.05	0.12	0.1	-5.68364	3.92e-05	0.574704	1	0.0131207	1	U71C1_ARATH	82.39	0	UDP-glycosyltransferase 71C1	EOA27013.1	83.958	0	AT2G29750.1	82.39	0	UDP-glucosyl transferase 71C1						GO:0003674,GO:0003824,GO:0005975,GO:0008150,GO:0008152,GO:0016740,GO:0016772,GO:0016773,GO:0044238,GO:0071704
1	32214.c1.g2.i1	40.39	9.62	1.92	0.95	-1.33104	0.742157	-2.84527	0.013165	-0.727161	1	MSRA2_ARATH	76.19	6.87e-135	Peptide methionine sulfoxide reductase A2	AAR15485.1	77.866	2.37e-137	AT5G07460.1	76.285	6.91e-135	peptidemethionine sulfoxide reductase 2				COG0091	ath:AT1G67430`KO:K02880
1	32216.c4.g2.i2	76.25	6.52	0.1	0	-2.56946	0.0999484	-5.89214	0.00127805	-1.77849	1	MYB61_ARATH	92.308	6.87e-102	Transcription factor MYB61 {ECO:0000305}	XP_010490115.1	92.308	9.54e-100	AT1G09540.1	92.308	9.46e-102	myb domain protein 61
1	32231.c0.g1.i2	32.18	5.27	3.59	2.57	-1.69019	0.0115626	-1.14722	0.346082	-0.240979	1	GLGB2_ARATH	91.971	0	1,4-alpha-glucan-branching enzyme 2-2, chloroplastic/amyloplastic	EOA19974.1	93.187	0	AT5G03650.1	91.981	0	starch branching enzyme 2.2				ENOG410YA7M	ath:AT5G47000`KO:K00430
1	32233.c0.g1.i1	12.09	0.11	0	0.12	-5.56071	0.00653713	-2.22522	1	1.97689	1	DIRL1_ARATH	78.313	8.72e-44	Putative lipid-transfer protein DIR1	XP_010493672.1	77.66	1.34e-46	AT5G48485.1	78.571	8.73e-44	Bifunctional inhibitor/lipid-transfer protein/seed storage 2S albumin superfamily protein						GO:0003674,GO:0005488,GO:0005575,GO:0005634,GO:0006355,GO:0008150,GO:0008270,GO:0009889,GO:0010468,GO:0010556,GO:0019219,GO:0019222,GO:0031323,GO:0031326,GO:0043167,GO:0043169,GO:0043226,GO:0043227,GO:0043229,GO:0043231,GO:0044424,GO:0044464,GO:0046872,GO:0046914,GO:0050789,GO:0050794,GO:0051171,GO:0051252,GO:0060255,GO:0065007,GO:0080090,GO:1903506,GO:2000112,GO:2001141
1	32233.c1.g1.i8	145.81	1.29	1.57	1.17	-5.93187	3.38e-18	-0.256136	1	-0.236284	1	PSAH1_ARATH	93.793	1.78e-76	Photosystem I reaction center subunit VI-1, chloroplastic	XP_010465621.1	96.552	2.51e-77	AT3G16140.1	93.836	2.65e-76	photosystem I subunit H-1						GO:0005575,GO:0031410,GO:0031982,GO:0043226,GO:0043227,GO:0043229,GO:0044424,GO:0044444,GO:0044464,GO:0097708
1	32233.c1.g2.i3	58.34	0.47	2.37	3.91	-5.94157	1.33e-09	1.65569	1	0.911513	1	PSAH1_ARATH	69.672	4.74e-50	Photosystem I reaction center subunit VI-1, chloroplastic	XP_010465621.1	69.672	4.19e-48	AT3G16140.1	69.672	6.52e-50	photosystem I subunit H-1				ENOG410XQUQ	ath:AT3G52140`KO:K03255	GO:0003674,GO:0003824,GO:0005575,GO:0008150,GO:0008152,GO:0008194,GO:0009850,GO:0009987,GO:0010817,GO:0016740,GO:0016757,GO:0016758,GO:0035251,GO:0042445,GO:0043226,GO:0043227,GO:0043229,GO:0043231,GO:0044237,GO:0044424,GO:0044464,GO:0046527,GO:0052638,GO:0065007,GO:0065008,GO:0080043,GO:0080044
1	32233.c1.g3.i1	49.94	0.85	1.5	0.65	-4.96859	1.12e-10	0.278869	1	-0.910194	1	ROGFD_ARATH	66.429	1.13e-45	Rop guanine nucleotide exchange factor 13 {ECO:0000303|PubMed:15980860}	ESQ48325.1	72.535	1.05e-56	AT3G16130.1	66.197	5.78e-46	RHO guanyl-nucleotide exchange factor 13
1	32233.c1.g4.i1	698.23	1.15	0	0	-7.97264	4.19e-12	-2.02774	1	0	1	PSAH2_ARATH	96.923	1.23e-24	Photosystem I reaction center subunit VI-2, chloroplastic	Q9SUI6.1	96.923	2.04e-22	AT1G52230.1	96.923	1.68e-24	photosystem I subunit H2			ExpAA=109.05^PredHel=5^Topology=i16-38o87-109i122-144o164-186i215-234o			GO:0003674,GO:0005215,GO:0005372,GO:0005575,GO:0005886,GO:0005887,GO:0005911,GO:0006810,GO:0006811,GO:0008150,GO:0009506,GO:0015250,GO:0015267,GO:0016020,GO:0016021,GO:0022803,GO:0022838,GO:0022857,GO:0022891,GO:0022892,GO:0030054,GO:0031224,GO:0031226,GO:0034220,GO:0044425,GO:0044459,GO:0044464,GO:0051179,GO:0051234,GO:0055085
1	32233.c1.g6.i2	310.18	1.27	2.34	1.82	-7.02288	5.06e-15	0.346279	1	-0.158848	1	PSAH_BRACM	98.851	1.2e-44	Photosystem I reaction center subunit VI, chloroplastic	XP_010503850.1	98.851	2.02e-43	AT1G52230.1	97.727	3.35e-44	photosystem I subunit H2						GO:0001101,GO:0003006,GO:0003674,GO:0003824,GO:0004596,GO:0005575,GO:0005829,GO:0005840,GO:0006464,GO:0006473,GO:0006474,GO:0006475,GO:0006807,GO:0006950,GO:0007275,GO:0008080,GO:0008150,GO:0008152,GO:0009414,GO:0009415,GO:0009628,GO:0009790,GO:0009793,GO:0009987,GO:0010035,GO:0016407,GO:0016410,GO:0016740,GO:0016746,GO:0016747,GO:0017198,GO:0018002,GO:0018193,GO:0018200,GO:0018209,GO:0019538,GO:…
1	32234.c0.g1.i2	47.64	6.73	9.29	5.37	-1.9156	0.0132617	-0.0872273	1	-0.569077	1	WDL5_ARATH	71.56	1.33e-31	Protein WVD2-like 5 {ECO:0000305}	XP_020872079.1	75.229	2.19e-40	AT4G32330.4	71.818	1.09e-31	TPX2 (targeting protein for Xklp2) protein family
1	32238.c0.g1.i1	11.64	0.42	0	0.09	-3.88926	0.00165041	-5.08638	0.200349	2.77794	1					EOA35691.1	70.27	1.08e-77	AT1G71970.1	64.732	8.64e-65	hypothetical protein
1	32238.c1.g1.i1	13.98	1.12	1.47	1.46	-2.73015	0.000457178	-0.122418	1	0.25158	1	CDPKD_ARATH	96.552	0	Calcium-dependent protein kinase 13	EFH52365.1	96.897	0	AT3G51850.2	96.552	0	calcium-dependent protein kinase 13						GO:0000160,GO:0000166,GO:0001101,GO:0002218,GO:0002252,GO:0002253,GO:0002376,GO:0002682,GO:0002684,GO:0003674,GO:0003824,GO:0004672,GO:0004674,GO:0004702,GO:0004707,GO:0004708,GO:0004712,GO:0004871,GO:0005057,GO:0005488,GO:0005524,GO:0005575,GO:0005634,GO:0005737,GO:0006464,GO:0006468,GO:0006793,GO:0006796,GO:0006807,GO:0006950,GO:0006952,GO:0006955,GO:0007165,GO:0007346,GO:0008150,GO:0008152,GO:…
1	32246.c0.g1.i3	8.15	4.84	2.03	1.6	0.228215	1	-1.83643	0.0334803	-0.0632471	1	KN14N_ARATH	88.06	0	Kinesin-like protein KIN-14N {ECO:0000305}	XP_010482874.1	88.308	0	AT5G54670.2	88.06	0	kinesin 3
1	32247.c0.g1.i2	22.92	11.46	0.89	0.73	-0.319018	1	-4.07653	0.000376289	-0.01743	1					EFH52125.1	90.196	0	AT3G47800.1	89.136	0	Galactose mutarotase-like superfamily protein
1	32250.c2.g3.i1	70.6	22.15	8.53	5.18	-0.804824	0.72016	-1.90592	0.00457243	-0.505341	1					EOA16586.1	79.245	1.67e-38	AT4G33740.5	81.188	7.06e-38	myb-like protein X	PF00096.25
1	32258.c0.g3.i1	14.62	1.24	2.32	2.81	-2.54457	0.0176086	0.3472	1	0.560538	1					EFH47899.1	77.574	1.19e-130	AT5G14970.1	77.206	4.9e-131	seed maturation-like protein
1	32262.c0.g1.i1	13.52	0	0.18	0.27	-8.33003	2.01e-07	2.48653	1	0.76745	1	OFP6_ARATH	68.132	4.72e-34	Transcription repressor OFP6	EOA29313.1	93.684	6.77e-59	AT2G36026.1	91.398	1.86e-53	Ovate family protein						GO:0003674,GO:0003824,GO:0006629,GO:0008150,GO:0008152,GO:0009056,GO:0016042,GO:0016787,GO:0044238,GO:0044699,GO:0044710,GO:0044712,GO:0071704,GO:1901575
1	32271.c1.g4.i3	957.77	143.97	91.78	92.18	-1.90796	0.0180992	-1.15491	0.235003	0.275212	1	RL342_ARATH	98.947	1.48e-62	60S ribosomal protein L34-2	EFH63507.1	100	8.26e-61	AT1G69620.1	98.947	2.03e-62	ribosomal protein L34
1	32275.c1.g3.i2	138.07	21.7	44.78	40.62	-1.80699	0.019771	0.473352	1	0.148125	1	RS193_ARATH	99.225	6.12e-93	40S ribosomal protein S19-3	XP_006281184.2	100	6.38e-91	AT5G61170.1	99.225	8.45e-93	Ribosomal protein S19e family protein
1	32275.c1.g4.i1	170.4	26.75	22.09	26.98	-1.82782	0.04436	-0.792608	0.945939	0.528012	1	RS193_ARATH	96	9.06e-68	40S ribosomal protein S19-3	XP_018453172.1	97.98	6.36e-66	AT5G61170.1	96.04	9.09e-68	Ribosomal protein S19e family protein	PF07725.11
1	32277.c0.g1.i2	310.52	57.49	1.1	0.72	-1.52313	0.116992	-6.18671	2.37e-15	-0.303578	1	ALEU_ARATH	92.262	0	Thiol protease aleurain	XP_010483683.1	94.345	0	AT5G60360.1	92.285	0	aleurain-like protease						GO:0001071,GO:0001708,GO:0003674,GO:0003676,GO:0003677,GO:0003700,GO:0005488,GO:0005575,GO:0005634,GO:0006139,GO:0006351,GO:0006355,GO:0006725,GO:0006807,GO:0007165,GO:0008150,GO:0008152,GO:0009058,GO:0009059,GO:0009719,GO:0009725,GO:0009734,GO:0009755,GO:0009791,GO:0009889,GO:0009987,GO:0010033,GO:0010050,GO:0010158,GO:0010468,GO:0010556,GO:0016070,GO:0018130,GO:0019219,GO:0019222,GO:0019438,GO:…
1	32277.c1.g1.i3	32.01	4.05	4.58	4.89	-2.09246	0.0062134	-0.309151	1	0.327608	1	LSF2_ARATH	91.93	0	Phosphoglucan phosphatase LSF2, chloroplastic	Q9SRK5.1	91.93	0	AT3G10940.1	91.958	0	dual specificity protein phosphatase (DsPTP1) family protein				ENOG410YNGS	ath:AT2G33835
1	32283.c0.g1.i3	112.25	13.71	2.57	2.36	-2.23168	0.00274213	-2.91923	1.86e-05	0.123841	1	MBOA1_ARATH	95.455	0	Lysophospholipid acyltransferase 1	XP_020869779.1	95.914	0	AT1G12640.1	95.464	0	MBOAT (membrane bound O-acyl transferase) family protein
1	32285.c0.g3.i2	10.73	0.85	2.24	0.99	-2.65633	0.0365553	0.785243	1	-0.900623	1	CHER1_ARATH	94.203	1.12e-84	Choline transporter protein 1 {ECO:0000303|PubMed:25008948}	XP_020886373.1	94.697	7.06e-84	AT3G15380.1	94.203	1.53e-84	Plasma-membrane choline transporter family protein
1	32293.c0.g1.i1	435.59	37.06	5.58	6.44	-2.76121	0.000458436	-3.17781	0.000489817	0.429543	1	FER2_ARATH	95.946	4.23e-72	Ferredoxin-2, chloroplastic	P16972.1	95.946	7.06e-70	AT1G60950.1	95.973	4.26e-72	2Fe-2S ferredoxin-like superfamily protein
1	32293.c0.g2.i1	248.67	8.21	3.89	3.6	-4.11467	2.08e-06	-1.61593	0.477323	0.174323	1	FER2_ARATH	88.785	6.25e-55	Ferredoxin-2, chloroplastic	XP_018458645.1	90.654	9.57e-56	AT1G60950.1	88.785	8.6e-55	2Fe-2S ferredoxin-like superfamily protein
1	32302.c0.g1.i4	69.03	4.62	0.33	0.54	-3.03996	6.16e-06	-4.24266	4.8e-06	0.829821	1	LBD42_ARATH	86.667	1.11e-98	LOB domain-containing protein 42	XP_010470800.1	86.667	4.13e-97	AT1G68510.1	86.667	1.53e-98	LOB domain-containing protein 42	PF00337.21
1	32306.c0.g3.i1	21.24	0.99	2.16	1.16	-3.57714	2.97e-07	0.57472	1	-0.617779	1					CDY20718.1	80.117	0	AT5G56530.2	93.112	0	tRNA-splicing ligase (DUF239)
1	32311.c0.g1.i1	31.52	12.55	4.41	4.01	-0.411829	1	-2.07297	0.00265915	0.168831	1	KN14N_ARATH	96.065	0	Kinesin-like protein KIN-14N {ECO:0000305}	EOA12956.1	97.685	0	AT5G54670.3	96.074	0	kinesin 3
1	32318.c2.g1.i1	143.82	24.49	9.04	7.91	-1.70861	0.0267056	-1.95491	0.00614382	0.0335298	1	CYB5E_ARATH	93.162	1.81e-76	Cytochrome b5 isoform E {ECO:0000303|PubMed:19054355}	ESQ43143.1	96.581	8.08e-77	AT5G53560.1	93.162	2.5e-76	cytochrome B5 isoform E
1	32324.c0.g1.i2	21.92	2.72	0.9	0.41	-2.15668	0.0121622	-2.08416	0.0856979	-0.829282	1	KCY3_ARATH	93.069	8.57e-134	UMP-CMP kinase 3 {ECO:0000255|HAMAP-Rule:MF_03172}	XP_010421507.1	94.554	1.99e-136	AT5G26667.4	93.103	8.62e-134	P-loop containing nucleoside triphosphate hydrolases superfamily protein				ENOG4111SK7	ath:AT5G44190
1	32324.c0.g2.i3	29.27	7.02	2.53	2.19	-1.1802	0.383141	-1.94729	0.031543	0.0592314	1	KCY3_ARATH	94.581	3.49e-134	UMP-CMP kinase 3 {ECO:0000255|HAMAP-Rule:MF_03172}	XP_010421506.1	94.313	9.27e-142	AT5G26667.1	93.396	8.56e-139	P-loop containing nucleoside triphosphate hydrolases superfamily protein
1	32331.c0.g1.i2	11.21	0	0	0	-7.24705	0.000972594	5.13e-15	1	0	1	BAS1B_ARATH	98.039	1.65e-29	2-Cys peroxiredoxin BAS1-like, chloroplastic	ANM69556.1	98.039	5.7e-28	AT5G06290.2	98.039	4.66e-30	2-cysteine peroxiredoxin B						GO:0003674,GO:0003824,GO:0004738,GO:0004739,GO:0005575,GO:0005975,GO:0006082,GO:0006090,GO:0006091,GO:0006096,GO:0006139,GO:0006163,GO:0006165,GO:0006629,GO:0006631,GO:0006633,GO:0006725,GO:0006732,GO:0006733,GO:0006753,GO:0006757,GO:0006793,GO:0006796,GO:0006807,GO:0008150,GO:0008152,GO:0008610,GO:0009056,GO:0009058,GO:0009117,GO:0009123,GO:0009126,GO:0009132,GO:0009135,GO:0009141,GO:0009144,GO:…
1	32331.c0.g3.i2	63.95	6.03	16.91	18.36	-2.47289	0.0029225	0.87751	1	0.37467	1	BAS1B_ARATH	93.182	2.65e-84	2-Cys peroxiredoxin BAS1-like, chloroplastic	XP_018493110.1	93.478	3.13e-86	AT5G06290.2	93.182	3.02e-85	2-cysteine peroxiredoxin B
1	32333.c1.g1.i3	378.21	21.29	3.27	3.17	-3.40714	5.84e-05	-3.14396	0.00145827	0.218902	1	ACP1_ARATH	90.244	1.26e-35	Acyl carrier protein 1, chloroplastic	XP_006299536.2	80.435	1.86e-35	AT3G05020.1	90.476	1.62e-35	acyl carrier protein 1
1	32333.c1.g2.i1	1595.97	63.91	9.23	12.41	-3.86281	1.7e-07	-3.25153	1.68e-05	0.660826	1	ACP1_ARATH	84.426	3.57e-69	Acyl carrier protein 1, chloroplastic	XP_006299536.2	91.803	3.76e-73	AT3G05020.1	84.426	4.92e-69	acyl carrier protein 1				COG0774	ath:AT1G24793`ath:AT1G25054`ath:AT1G25145`ath:AT1G25210`KO:K02535	GO:0001071,GO:0003674,GO:0003700,GO:0005488,GO:0005543,GO:0005575,GO:0005634,GO:0005829,GO:0005886,GO:0006355,GO:0006464,GO:0006807,GO:0008150,GO:0008152,GO:0008289,GO:0009536,GO:0009605,GO:0009607,GO:0009620,GO:0009889,GO:0009987,GO:0010468,GO:0010556,GO:0016020,GO:0016567,GO:0019219,GO:0019222,GO:0019538,GO:0031323,GO:0031326,GO:0032446,GO:0035091,GO:0036211,GO:0043167,GO:0043168,GO:0043170,GO:…
1	32343.c0.g2.i1	10.09	0.25	1.32	1.27	-4.34128	0.00524986	1.68893	1	0.15284	1					XP_019096127.1	95.349	1.02e-50	AT3G23660.1	94.318	5.09e-51	Sec23/Sec24 protein transport family protein
1	32352.c1.g2.i6	8.73	1.13	0.42	0.39	-2.0358	0.0175966	-1.91563	0.215945	0.160521	1					EFH44438.1	100	5.03e-17	AT4G15802.1	97.5	1.2e-18	heat shock factor binding protein
1	32354.c0.g2.i3	13.27	2.92	0.38	0.39	-1.35041	0.573012	-3.35095	0.0112812	0.274596	1	NFYC4_ARATH	89.266	1.63e-90	Nuclear transcription factor Y subunit C-4	Q9FMV5.1	89.266	2.72e-88	AT5G63470.2	89.326	1.64e-90	nuclear factor Y subunit C4
1	32355.c0.g1.i3	29.53	0.09	0.03	0	-7.03981	2.33e-05	-1.89946	1	-1.77849	1					EFH48420.1	57.817	2.67e-127	AT5G25410.1	56.742	3.62e-127	transmembrane protein putative (DUF239)						GO:0000375,GO:0000377,GO:0000398,GO:0003674,GO:0003676,GO:0003723,GO:0003729,GO:0005488,GO:0005515,GO:0005575,GO:0005681,GO:0006139,GO:0006396,GO:0006397,GO:0006725,GO:0006807,GO:0006950,GO:0006979,GO:0008150,GO:0008152,GO:0008380,GO:0009987,GO:0016070,GO:0016071,GO:0016604,GO:0016607,GO:0030529,GO:0032991,GO:0034641,GO:0042802,GO:0043170,GO:0044237,GO:0044238,GO:0044260,GO:0044422,GO:0044424,GO:…
1	32357.c2.g1.i3	30.3	2.68	0.56	0.65	-2.48994	0.0189547	-2.73962	0.0462341	0.376489	1					XP_020873090.1	84.722	2e-58	AT4G35320.1	84.028	1.1e-59	hypothetical protein
1	32366.c0.g1.i2	21.37	2.97	1.39	0.84	-1.98963	0.0231876	-1.63708	0.320869	-0.411622	1					XP_020873015.1	81.034	5e-37	AT4G28025.1	82.143	5.99e-32	hypothetical protein
1	32368.c0.g1.i2	47.37	25.44	6	4.46	-0.0921672	1	-2.5572	0.000605236	-0.218795	1	KAO2_ARATH	90.529	0	Ent-kaurenoic acid oxidase 2	EOA26972.1	91.648	0	AT2G32440.2	90.549	0	ent-kaurenoic acid hydroxylase 2				COG1874	ath:AT4G35010
1	32368.c1.g2.i3	179.07	14.62	17.21	16.3	-2.73636	5.91e-05	-0.261529	1	0.20375	1	TSJT1_TOBAC	42.282	1.84e-35	Stem-specific protein TSJT1	EFH48123.1	97.436	9.5e-167	AT5G19140.1	97.021	4.21e-168	aluminum induced protein with YGL and LRDR motifs
1	32373.c0.g1.i5	61.71	3.08	0.19	0.08	-3.57384	1.9e-05	-4.50186	5.15e-06	-0.929074	1	ST7R_ARATH	95.607	0	7-dehydrocholesterol reductase	EFH70511.1	95.866	0	AT1G50430.1	95.607	0	Ergosterol biosynthesis ERG4/ERG24 family						GO:0001101,GO:0003674,GO:0005215,GO:0005451,GO:0005575,GO:0005886,GO:0006810,GO:0006811,GO:0006812,GO:0006818,GO:0006820,GO:0007568,GO:0008150,GO:0008324,GO:0008509,GO:0010035,GO:0010150,GO:0010167,GO:0015075,GO:0015077,GO:0015078,GO:0015079,GO:0015103,GO:0015112,GO:0015291,GO:0015293,GO:0015297,GO:0015298,GO:0015299,GO:0015386,GO:0015491,GO:0015672,GO:0015698,GO:0015706,GO:0015992,GO:0016020,GO:…
1	32375.c1.g1.i2	28.16	2.83	0.92	0.71	-2.4648	0.000222013	-2.13428	0.0032997	-0.127845	1	CINV2_ARATH	94.91	0	Alkaline/neutral invertase CINV2 {ECO:0000305}	EOA20198.1	88.63	0	AT4G09510.1	94.91	0	cytosolic invertase 2
1	32375.c1.g5.i1	63.44	6.58	3.12	2.06	-2.33451	0.00110897	-1.64288	0.317499	-0.324848	1	INVB_ARATH	96.429	6.99e-66	Probable alkaline/neutral invertase B {ECO:0000305}	XP_010437560.1	96.429	2.5e-64	AT4G34860.3	96.46	6.99e-66	Plant neutral invertase family protein
1	32381.c0.g4.i1	168.69	18.71	18.13	23.2	-2.28729	0.00255955	-0.610779	1	0.629275	1	RS22_ARATH	98.058	4.35e-68	40S ribosomal protein S2-2	XP_009794389.1	96.078	1.14e-66	AT1G59359.1	98.058	5.98e-68	Ribosomal protein S5 family protein
1	32382.c0.g1.i4	40.84	10.58	4.76	3.87	-1.00617	0.43545	-1.67954	0.0307517	-0.079165	1					AAD55506.1	94.937	4.58e-165	AT1G70900.1	94.958	3.08e-167	hypothetical protein
1	32385.c0.g1.i1	9.43	0.8	0.18	0.06	-2.69823	0.001535	-2.54406	0.120358	-1.17596	1					ESQ42695.1	52.206	1.54e-10
1	32385.c1.g1.i2	8.87	0.1	0	0	-5.26192	0.00386838	-2.02734	1	0	1	SMR10_ARATH	68.667	3.33e-60	Cyclin-dependent protein kinase inhibitor SMR10 {ECO:0000303|PubMed:24399300, ECO:0000303|PubMed:26546445}	XP_010470036.1	72.185	1.13e-67	AT2G28870.1	68.874	3.34e-60	cyclin-dependent kinase inhibitor SMR1-like protein	PF02181.22					GO:0001101,GO:0003674,GO:0005215,GO:0005575,GO:0005774,GO:0005886,GO:0006810,GO:0006950,GO:0008150,GO:0008324,GO:0009414,GO:0009415,GO:0009605,GO:0009606,GO:0009628,GO:0009629,GO:0009630,GO:0009705,GO:0009914,GO:0009926,GO:0010035,GO:0010119,GO:0010540,GO:0010817,GO:0015075,GO:0015077,GO:0015079,GO:0015291,GO:0015297,GO:0016020,GO:0016021,GO:0022804,GO:0022821,GO:0022857,GO:0022890,GO:0022891,GO:…
1	32385.c1.g2.i1	7.28	0.33	0	0	-3.44537	0.0293162	-4.19958	1	0	1	SMR10_ARATH	67.089	1.79e-63	Cyclin-dependent protein kinase inhibitor SMR10 {ECO:0000303|PubMed:24399300, ECO:0000303|PubMed:26546445}	EFH57274.1	66.456	8.25e-63	AT2G28870.1	67.089	2.47e-63	cyclin-dependent kinase inhibitor SMR1-like protein
1	32388.c0.g1.i4	65.16	4.25	1.65	1.69	-3.00409	0.000342839	-1.82555	0.142665	0.284458	1	ACLB2_ARATH	99.611	1.35e-152	ATP-citrate synthase beta chain protein 2	XP_013612496.1	99.611	9.62e-152	AT5G49460.2	99.611	1.86e-152	ATP citrate lyase subunit B 2
1	32388.c0.g3.i1	207.15	18.44	7.15	2.8	-2.57885	0.0147591	-1.81748	0.230742	-1.09615	1	ACLB2_ARATH	98.171	4.08e-113	ATP-citrate synthase beta chain protein 2	CDY68764.1	99.39	4.97e-113	AT5G49460.2	98.171	5.59e-113	ATP citrate lyase subunit B 2
1	32399.c2.g2.i2	157.13	0.83	0.39	0.42	-6.73405	3.48e-19	-1.56594	0.428647	0.340953	1	CRD1_HORVU	71.464	0	Magnesium-protoporphyrin IX monomethyl ester [oxidative] cyclase, chloroplastic	PNT29412.1	69.114	0	AT3G56940.1	92.667	0	dicarboxylate diiron protein putative (Crd1)
1	32399.c3.g1.i3	32.35	4.05	2.35	1.45	-2.13564	0.00263117	-1.32281	0.177167	-0.440825	1	CID10_ARATH	83.051	0	Polyadenylate-binding protein-interacting protein 10	XP_020881691.1	88.136	0	AT3G49390.3	83.051	0	CTC-interacting domain 10	PF00069.24
1	32406.c2.g1.i2	19.88	1.12	0	0.13	-3.25998	0.00109304	-5.00218	0.189855	1.97661	1	BAME1_ARATH	99.367	3.23e-113	Leucine-rich repeat receptor-like serine/threonine-protein kinase BAM1	XP_013709288.1	97.468	3.27e-112	AT5G65700.2	99.367	4.38e-113	Leucine-rich receptor-like protein kinase family protein	PF00067.21			COG0438	ath:AT1G04920`KO:K00696
1	32406.c2.g2.i2	21.31	0.4	0.05	0.05	-4.89481	1.3e-10	-3.35162	0.0129689	0.266147	1	Y1680_ARATH	89.201	0	Probable leucine-rich repeat receptor-like protein kinase At1g68400	EFH64920.1	90.95	0	AT1G68400.1	89.217	0	leucine-rich repeat transmembrane protein kinase family protein
1	32406.c3.g2.i1	73.27	5.71	7.23	6.39	-2.83973	0.000332324	-0.186037	1	0.0347177	1					AAB88644.1	70.635	1.77e-25	AT2G42190.3	70.866	1.06e-27	rho GTPase-activating gacO-like protein						GO:0005575,GO:0005739,GO:0043226,GO:0043227,GO:0043229,GO:0043231,GO:0044424,GO:0044444,GO:0044464
1	32420.c0.g1.i1	64.43	8.28	7.09	6.97	-2.13137	0.0249824	-0.748748	1	0.202253	1	RLA22_ARATH	94.118	2.92e-12	60S acidic ribosomal protein P2-2	ANM63064.1	94.286	6.44e-11	AT2G27720.4	94.286	5.28e-13	60S acidic ribosomal protein family
1	32421.c0.g1.i2	12.25	0.42	0	0.02	-3.949	2.13e-06	-6.04767	0.0143371	1.97135	1	SCAB3_ARATH	91.233	0	Stomatal closure-related actin-binding protein 3 {ECO:0000303|PubMed:21719691}	XP_010504553.1	91.507	0	AT3G56480.1	91.233	0	myosin heavy chain-like protein				ENOG4111JA8	ath:AT3G27080	GO:0000118,GO:0000122,GO:0000785,GO:0005575,GO:0005634,GO:0006139,GO:0006325,GO:0006351,GO:0006355,GO:0006357,GO:0006464,GO:0006476,GO:0006725,GO:0006807,GO:0008150,GO:0008152,GO:0009058,GO:0009059,GO:0009889,GO:0009890,GO:0009892,GO:0009987,GO:0010468,GO:0010556,GO:0010558,GO:0010605,GO:0010629,GO:0016043,GO:0016070,GO:0016569,GO:0016570,GO:0016575,GO:0018130,GO:0019219,GO:0019222,GO:0019438,GO:…
1	32422.c0.g1.i4	13.55	0.15	0	0.34	-5.40584	6.39e-08	-3.33813	1	4.2298	1	TIC32_PEA	62.5	3.69e-91	Short-chain dehydrogenase TIC 32, chloroplastic	AAM13049.1	96.729	3.78e-156	AT5G02540.1	96.296	3.38e-158	NAD(P)-binding Rossmann-fold superfamily protein						GO:0000151,GO:0001932,GO:0001933,GO:0003674,GO:0003824,GO:0004842,GO:0005488,GO:0005515,GO:0005575,GO:0005634,GO:0005737,GO:0005739,GO:0007275,GO:0008037,GO:0008150,GO:0009314,GO:0009416,GO:0009553,GO:0009566,GO:0009567,GO:0009628,GO:0009639,GO:0009642,GO:0009644,GO:0009743,GO:0009744,GO:0009889,GO:0009891,GO:0009892,GO:0009893,GO:0009962,GO:0009963,GO:0009987,GO:0009988,GO:0010033,GO:0010218,GO:…
1	32426.c3.g1.i1	18.12	1.56	0	0	-2.60458	0.0949798	-6.84673	0.0101808	0	1					EOA35767.1	71.171	9.89e-96	AT1G61667.2	74.86	4.67e-88	serine protease putative (Protein of unknown function DUF538)						GO:0000988,GO:0000989,GO:0003674,GO:0003712,GO:0003824,GO:0004402,GO:0005488,GO:0005575,GO:0005634,GO:0006139,GO:0006351,GO:0006355,GO:0006725,GO:0006807,GO:0008080,GO:0008150,GO:0008152,GO:0008270,GO:0009058,GO:0009059,GO:0009889,GO:0009987,GO:0010468,GO:0010556,GO:0016070,GO:0016407,GO:0016410,GO:0016740,GO:0016746,GO:0016747,GO:0018130,GO:0019219,GO:0019222,GO:0019438,GO:0031323,GO:0031326,GO:…
1	32432.c0.g1.i1	18.35	11.93	4.24	3.08	0.317143	1	-2.05816	0.00143913	-0.201664	1	SRF6_ARATH	88.806	0	Protein STRUBBELIG-RECEPTOR FAMILY 6	EOA37597.1	90.025	0	AT1G53730.1	88.806	0	STRUBBELIG-receptor family 6
1	32436.c0.g1.i2	22.49	1.52	0.74	0.85	-2.91571	3.11e-05	-1.56926	0.357211	0.485015	1	CHL_ARATH	82.264	4.46e-163	Chloroplastic lipocalin {ECO:0000303|PubMed:19674405}	XP_020881544.1	83.088	6.08e-174	AT3G47860.1	82.264	4.86e-163	chloroplastic lipocalin	PF00357.19
1	32438.c1.g2.i7	22.27	3.37	4.24	2.78	-1.7673	0.0152326	-0.23811	1	-0.306887	1	ECH2M_ARATH	84.337	4.37e-130	Probable enoyl-CoA hydratase 2, mitochondrial {ECO:0000305}	XP_023635297.1	84.94	7.14e-130	AT4G16800.1	84.337	5.31e-130	ATP-dependent caseinolytic (Clp) protease/crotonase family protein	PF13155.5
1	32439.c2.g2.i2	13.49	4.75	0.89	0.91	-0.629467	1	-2.8761	0.000431735	0.329986	1
1	32441.c2.g1.i7	35.19	7.04	0.1	0.03	-1.39627	0.7867	-6.42675	8.1e-06	-1.0686	1	AP3_ARATH	94.872	1.7e-149	Floral homeotic protein APETALA 3	EFH54229.1	95.299	6.69e-148	AT3G54340.1	94.894	2.99e-149	K-box region and MADS-box transcription factor family protein	PF10613.8
1	32444.c1.g1.i1	20.75	0.77	0.08	0.07	-3.77319	0.00730035	-3.62199	0.195846	0.249024	1					XP_002871913.2	90.698	0	AT5G19970.1	91.254	0	GRAS family transcription factor family protein	PF01547.24			COG0351	ath:AT1G22940`KO:K14153
1	32447.c0.g2.i1	25.3	1.42	0.41	0.49	-3.21438	9.52e-07	-2.31052	0.0129721	0.480196	1	VTC4_ARATH	94.096	6.18e-177	Inositol-phosphate phosphatase	XP_010502238.1	94.465	5.75e-177	AT3G02870.1	94.118	4.25e-177	Inositol monophosphatase family protein
1	32450.c0.g1.i2	8.92	0.51	1	0.67	-3.2303	4.88e-06	0.443629	1	-0.253037	1	MCM2_ARATH	94.658	0	DNA replication licensing factor MCM2	EFH67562.1	95.508	0	AT1G44900.1	94.664	0	minichromosome maintenance (MCM2/3/5) family protein	PF13191.5
1	32451.c0.g2.i4	231.14	33.87	84.47	67.16	-1.79982	0.00874813	0.745604	0.725982	-0.0432767	1	PH1_ARATH	94.615	6.74e-85	Pleckstrin homology domain-containing protein 1	EFH55488.1	96.154	3.54e-84	AT2G29700.1	94.615	9.3e-85	pleckstrin homologue 1	PF03732.16					GO:0001071,GO:0003674,GO:0003676,GO:0003677,GO:0003700,GO:0005488,GO:0005575,GO:0005634,GO:0006139,GO:0006351,GO:0006355,GO:0006725,GO:0006807,GO:0008150,GO:0008152,GO:0009058,GO:0009059,GO:0009889,GO:0009987,GO:0010468,GO:0010556,GO:0016070,GO:0018130,GO:0019219,GO:0019222,GO:0019438,GO:0031323,GO:0031326,GO:0032774,GO:0034641,GO:0034645,GO:0034654,GO:0043167,GO:0043169,GO:0043170,GO:0043226,GO:…
1	32458.c0.g1.i8	5.58	2.68	0.66	0.57	-0.103861	1	-2.48746	0.0184552	-0.0136414	1					EOA38210.1	73.913	3.72e-102	AT1G23560.2	69.697	1.01e-89	OBP32pep putative (DUF220)
1	32458.c1.g1.i2	15.96	8.44	1.4	3.3	-0.0801687	1	-3.07342	0.000230249	1.40684	1	YAB5_ARATH	91.971	1.03e-91	Axial regulator YABBY 5	XP_010510888.1	92.701	3.44e-90	AT2G26580.2	92.029	1.04e-91	plant-specific transcription factor YABBY family protein
1	32458.c1.g3.i1	6.58	5.23	1.67	1.62	0.508789	1	-2.16016	0.0145854	0.158174	1	YAB5_ARATH	92.308	6.76e-38	Axial regulator YABBY 5	ESQ51176.1	96.923	1.15e-37	AT2G26580.2	92.308	9.28e-38	plant-specific transcription factor YABBY family protein	PF12732.6
1	32479.c2.g1.i2	48.09	3.32	0.22	0.08	-2.90553	0.00038788	-4.27857	0.000407011	-1.0686	1	BZP44_ARATH	80.645	2.61e-23	bZIP transcription factor 44 {ECO:0000305}	EFH63849.1	96.226	1.37e-24	AT1G75390.2	80.645	1.08e-23	basic leucine-zipper 44
1	32480.c0.g2.i1	7.15	3.37	0.69	0.32	-0.191572	1	-2.88033	0.00295423	-0.784881	1	PGIP2_ARATH	95.686	7.81e-159	Polygalacturonase inhibitor 2	Q9M5J8.2	95.686	1.3e-156	AT5G06870.1	95.686	1.08e-158	polygalacturonase inhibiting protein 2
1	32484.c3.g1.i2	53.95	22.75	0.37	1.25	-0.486057	1	-6.30404	5.1e-09	1.86361	1	MYB13_ARATH	71.226	1.02e-94	Transcription factor MYB13 {ECO:0000305}	XP_020870498.1	70	1.18e-94	AT1G06180.1	71.226	1.41e-94	myb domain protein 13				COG2939	ath:AT5G09640`KO:K09756	GO:0003674,GO:0003676,GO:0003824,GO:0003964,GO:0004175,GO:0004190,GO:0004518,GO:0004519,GO:0005488,GO:0006139,GO:0006259,GO:0006310,GO:0006725,GO:0006807,GO:0008150,GO:0008152,GO:0008233,GO:0009987,GO:0015074,GO:0016740,GO:0016772,GO:0016779,GO:0016787,GO:0016788,GO:0034061,GO:0034641,GO:0043167,GO:0043169,GO:0043170,GO:0044237,GO:0044238,GO:0044260,GO:0046483,GO:0046872,GO:0070001,GO:0070011,GO:…
1	32484.c4.g1.i2	13.17	0.02	0	0.05	-8.02818	1.02e-13	-2.02699	1	2.78155	1	MY111_ARATH	82.997	0	Transcription factor MYB111 {ECO:0000303|PubMed:11597504}	EFH41988.1	84.483	0	AT5G49330.1	83.046	0	myb domain protein 111						GO:0001906,GO:0005575,GO:0005576,GO:0006950,GO:0006952,GO:0008150,GO:0009605,GO:0009607,GO:0009620,GO:0031640,GO:0035821,GO:0043207,GO:0044364,GO:0050832,GO:0050896,GO:0051704,GO:0051707,GO:0065007,GO:0065008,GO:0098542
1	32489.c0.g1.i1	124.8	44.55	23.13	19.01	-0.63148	1	-1.46928	0.0464614	-0.0673189	1	CYB5E_ARATH	91.011	8.62e-52	Cytochrome b5 isoform E {ECO:0000303|PubMed:19054355}	Q42342.2	91.011	1.44e-49	AT5G53560.1	91.111	9.78e-52	cytochrome B5 isoform E
1	32493.c0.g2.i3	15.9	0.33	0.39	0.68	-4.68373	0.00761015	-0.399841	1	1.20072	1																	GO:0003674,GO:0003676,GO:0003824,GO:0003964,GO:0004175,GO:0004190,GO:0004518,GO:0004519,GO:0005488,GO:0006139,GO:0006259,GO:0006310,GO:0006725,GO:0006807,GO:0008150,GO:0008152,GO:0008233,GO:0009987,GO:0015074,GO:0016740,GO:0016772,GO:0016779,GO:0016787,GO:0016788,GO:0034061,GO:0034641,GO:0043167,GO:0043169,GO:0043170,GO:0044237,GO:0044238,GO:0044260,GO:0046483,GO:0046872,GO:0070001,GO:0070011,GO:…
1	32505.c0.g1.i4	18.24	0.43	0	4.21	-4.09041	0.0335239	-2.01634	1	4.80748	1																	GO:0005575,GO:0005739,GO:0043226,GO:0043227,GO:0043229,GO:0043231,GO:0044424,GO:0044444,GO:0044464
1	32514.c0.g2.i3	127.98	95.84	0.42	0.09	0.448353	1	-8.28013	2.55e-14	-1.42196	1	CISY1_ARATH	75.301	1.51e-75	Citrate synthase 1, peroxisomal	Q9LXS7.1	75.301	2.51e-73	AT3G58740.1	75.301	2.06e-75	citrate synthase 1						GO:0000988,GO:0000989,GO:0001101,GO:0003674,GO:0003712,GO:0003714,GO:0005575,GO:0005634,GO:0006139,GO:0006351,GO:0006355,GO:0006725,GO:0006807,GO:0006950,GO:0006952,GO:0008150,GO:0008152,GO:0009058,GO:0009059,GO:0009611,GO:0009719,GO:0009725,GO:0009753,GO:0009889,GO:0009890,GO:0009892,GO:0009966,GO:0009987,GO:0010033,GO:0010200,GO:0010243,GO:0010468,GO:0010556,GO:0010558,GO:0010605,GO:0010646,GO:…
1	32515.c0.g1.i1	15.2	1.88	3.18	1.51	-2.06051	0.0290004	0.111314	1	-0.834219	1	CAAT8_ARATH	92.771	0	Cationic amino acid transporter 8, vacuolar	EFH66463.1	92.771	0	AT1G17120.1	92.771	0	cationic amino acid transporter 8
1	32516.c2.g1.i3	31.63	2.8	0.03	0.1	-2.5857	0.0340108	-6.85112	3.66e-05	1.90613	1	SMT3B_ARATH	92.479	0	24-methylenesterol C-methyltransferase 3	EFH65316.1	94.15	0	AT1G76090.1	92.5	0	sterol methyltransferase 3	PF14159.5
1	32516.c2.g2.i1	83.19	33.59	6.68	2.58	-0.435651	1	-2.8531	2.63e-06	-1.10746	1	SMT2_ARATH	96.703	0	24-methylenesterol C-methyltransferase 2	EFH69357.1	97.527	0	AT1G20330.1	96.712	0	sterol methyltransferase 2	PF03947.17
1	32516.c4.g1.i3	548.48	72.65	59.24	60.98	-2.05696	0.00893515	-0.846306	0.56326	0.30612	1	RS163_ARATH	95.07	1.62e-97	40S ribosomal protein S16-3	XP_010420587.1	99.296	1.33e-97	AT5G18380.1	95.07	2.24e-97	Ribosomal protein S5 domain 2-like superfamily protein
1	32525.c0.g1.i3	9.14	0.1	0.15	0.36	-5.66266	2.54e-08	-0.0134366	1	1.63525	1	ILVH1_ARATH	88.115	0	Acetolactate synthase small subunit 1, chloroplastic	Q9FFF4.1	88.115	0	AT5G16290.2	88.139	0	VALINE-TOLERANT 1						GO:0005575,GO:0005886,GO:0005911,GO:0006950,GO:0006952,GO:0008150,GO:0009506,GO:0009605,GO:0009607,GO:0009617,GO:0016020,GO:0016021,GO:0030054,GO:0031224,GO:0042742,GO:0043207,GO:0044425,GO:0044464,GO:0050896,GO:0051704,GO:0051707,GO:0098542
1	32528.c1.g1.i2	12.33	0.27	0.09	0.21	-4.66277	5.36e-06	-1.96065	1	1.42941	1	AGP9_ARATH	83.784	8.59e-11	Classical arabinogalactan protein 9	CDY52416.1	83.333	2.04e-10	AT2G14890.1	84.211	6.26e-11	arabinogalactan protein 9
1	32528.c1.g2.i1	47.14	0.53	0.26	0.37	-5.594	2.67e-13	-1.5099	0.670118	0.669787	1																	GO:0003674,GO:0003735,GO:0005198,GO:0005575,GO:0005622,GO:0005840,GO:0006412,GO:0006518,GO:0006807,GO:0008150,GO:0008152,GO:0009058,GO:0009059,GO:0009987,GO:0015935,GO:0019538,GO:0022626,GO:0022627,GO:0030529,GO:0032991,GO:0034641,GO:0034645,GO:0042788,GO:0043043,GO:0043170,GO:0043226,GO:0043228,GO:0043229,GO:0043232,GO:0043603,GO:0043604,GO:0044237,GO:0044238,GO:0044249,GO:0044260,GO:0044267,GO:…
1	32528.c2.g1.i2	460.42	5.24	0.34	0	-5.51989	4.69e-05	-4.28367	0.00737009	-5.13061	1					XP_010507717.1	96.124	8.48e-80					PF01535.19					GO:0000166,GO:0001676,GO:0003674,GO:0003824,GO:0003995,GO:0003997,GO:0005488,GO:0005575,GO:0005777,GO:0005911,GO:0006082,GO:0006629,GO:0006631,GO:0006635,GO:0006950,GO:0008150,GO:0008152,GO:0009056,GO:0009058,GO:0009062,GO:0009506,GO:0009605,GO:0009607,GO:0009611,GO:0009620,GO:0009694,GO:0009695,GO:0009987,GO:0010035,GO:0010038,GO:0016042,GO:0016053,GO:0016054,GO:0016491,GO:0016627,GO:0016634,GO:…
1	32534.c0.g1.i1	280.42	34.23	12.53	9.69	-2.21737	0.0032892	-1.96296	0.00292128	-0.142362	1	RL312_ARATH	94.253	2e-35	60S ribosomal protein L31-2	XP_008337630.1	83.673	1.02e-33	AT4G26230.1	94.253	2.75e-35	Ribosomal protein L31e family protein	PF05641.11
1	32534.c0.g2.i2	75	12.82	6.28	6.68	-1.72555	0.0340913	-1.54819	0.0397155	0.364772	1	RL312_ARATH	95.745	1.75e-39	60S ribosomal protein L31-2	EFH45879.1	96.809	1.59e-37	AT4G26230.1	95.789	1.79e-39	Ribosomal protein L31e family protein
1	32534.c0.g3.i2	67.11	10.14	3.84	2.93	-1.90827	0.0196731	-1.88872	0.0307517	-0.165302	1	RL312_ARATH	92.391	2.52e-37	60S ribosomal protein L31-2	EFH45879.1	93.478	1.83e-35	AT4G26230.1	92.391	3.47e-37	Ribosomal protein L31e family protein						GO:0001071,GO:0003674,GO:0003676,GO:0003677,GO:0003700,GO:0005488,GO:0005575,GO:0005634,GO:0006139,GO:0006351,GO:0006355,GO:0006725,GO:0006807,GO:0008150,GO:0008152,GO:0009058,GO:0009059,GO:0009889,GO:0009987,GO:0010468,GO:0010556,GO:0016070,GO:0018130,GO:0019219,GO:0019222,GO:0019438,GO:0031323,GO:0031326,GO:0032774,GO:0034641,GO:0034645,GO:0034654,GO:0043170,GO:0043226,GO:0043227,GO:0043229,GO:…
1	32536.c0.g1.i1	19.77	0	0.15	0	-7.95935	0.000136849	1.72555	1	-1.77846	1	DF303_ARATH	69.444	1.08e-27	Putative defensin-like protein 303	XP_019087062.1	72.826	2.4e-37	AT5G46873.1	69.444	1.47e-27	Defensin-like (DEFL) family protein	PF01301.18					GO:0005575,GO:0005886,GO:0016020,GO:0016021,GO:0031224,GO:0044425,GO:0044464
1	32539.c0.g3.i2	26.76	0.96	0.08	0.26	-3.94883	6.47e-08	-3.8422	0.00269576	1.73378	1	HEM11_ARATH	93.569	0	Glutamyl-tRNA reductase 1, chloroplastic	XP_010470268.1	93.291	0	AT1G58290.1	93.569	0	Glutamyl-tRNA reductase family protein
1	32551.c0.g1.i3	16.83	1.58	1.59	0.5	-2.45899	0.00333944	-0.574359	1	-1.44959	1	PPA12_ARATH	89.126	0	Fe(3+)-Zn(2+) purple acid phosphatase 12	EFH51023.1	90.192	0	AT2G27190.1	89.149	0	purple acid phosphatase 12
1	32556.c0.g1.i1	13.41	0.57	0.13	0.09	-3.74175	4.93e-06	-2.64016	0.0884512	-0.190874	1					XP_010417292.1	93.058	0	AT2G25270.1	93.019	0	transmembrane protein
1	32564.c0.g2.i2	56.61	5.31	4.82	3.94	-2.49902	7.41e-05	-0.678316	1	-0.0409767	1					XP_010428006.1	90.374	2.72e-119	AT1G71750.1	87.831	3.05e-116	Hypoxanthine-guanine phosphoribosyltransferase	PF05691.11
1	32566.c0.g1.i4	38.53	2.09	5.15	4.06	-3.22941	2.27e-05	0.655628	1	-0.106591	1	NDHN_ARATH	90.431	4.93e-136	NAD(P)H-quinone oxidoreductase subunit N, chloroplastic {ECO:0000305}	EFH42514.1	92.344	5.09e-137	AT5G58260.1	90.476	4.98e-136	oxidoreductases acting on NADH or NADPH quinone or similar compound as acceptor
1	32573.c1.g1.i6	57.3	20.8	10.97	8.26	-0.564046	1	-1.51754	0.043479	-0.140261	1					CDY41829.1	59.783	1.36e-53	AT3G17780.1	60.541	1.96e-52	B-cell receptor-associated-like protein
1	32574.c0.g1.i1	11.97	0.36	0.54	0.33	-4.22377	1.16e-07	0.0203828	1	-0.37811	1	Y4361_ARATH	92.254	0	Probable LRR receptor-like serine/threonine-protein kinase At4g36180	EOA15929.1	92.518	0	AT4G36180.1	92.26	0	Leucine-rich receptor-like protein kinase family protein
1	32574.c1.g1.i1	21.33	5.42	0.29	0.12	-1.06506	0.358848	-4.75929	7.83e-10	-0.978785	1	EXO_ARATH	89.967	0	Protein EXORDIUM	XP_006288093.2	83.573	0	AT4G08950.1	90	0	Phosphate-responsive 1 family protein	PF00156.26					GO:0003674,GO:0003676,GO:0003824,GO:0003964,GO:0004175,GO:0004190,GO:0004518,GO:0004519,GO:0005488,GO:0006139,GO:0006259,GO:0006310,GO:0006725,GO:0006807,GO:0008150,GO:0008152,GO:0008233,GO:0009987,GO:0015074,GO:0016740,GO:0016772,GO:0016779,GO:0016787,GO:0016788,GO:0034061,GO:0034641,GO:0043167,GO:0043169,GO:0043170,GO:0044237,GO:0044238,GO:0044260,GO:0046483,GO:0046872,GO:0070001,GO:0070011,GO:…
1	32574.c1.g2.i2	35.46	9.6	0	0.05	-1.10395	0.704464	-9.20075	2.31e-08	2.01321	1	EXO_ARATH	87.234	4.59e-154	Protein EXORDIUM	EFH50761.1	88.511	3.45e-153	AT4G08950.1	87.288	4.62e-154	Phosphate-responsive 1 family protein	PF00069.24					GO:0003006,GO:0003674,GO:0003676,GO:0003677,GO:0005488,GO:0005575,GO:0005634,GO:0006139,GO:0006351,GO:0006355,GO:0006725,GO:0006807,GO:0007389,GO:0008150,GO:0008152,GO:0009058,GO:0009059,GO:0009791,GO:0009799,GO:0009855,GO:0009889,GO:0009908,GO:0009987,GO:0010468,GO:0010556,GO:0016070,GO:0018130,GO:0019219,GO:0019222,GO:0019438,GO:0022414,GO:0031323,GO:0031326,GO:0032501,GO:0032502,GO:0032774,GO:…
1	32586.c1.g1.i5	10.09	3.8	0.09	0.08	-0.556017	1	-5.48886	0.00120013	0.234052	1	STAD1_ARATH	87.654	3.43e-46	Stearoyl-[acyl-carrier-protein] 9-desaturase 1, chloroplastic	XP_010492508.1	96.296	2.64e-48	AT5G16240.1	87.654	4.68e-46	Plant stearoyl-acyl-carrier-protein desaturase family protein				COG5164	ath:AT5G04290	GO:0003674,GO:0003824,GO:0005575,GO:0005737,GO:0005975,GO:0005996,GO:0006004,GO:0006464,GO:0006486,GO:0006807,GO:0008150,GO:0008152,GO:0009987,GO:0016021,GO:0016740,GO:0016757,GO:0019318,GO:0019538,GO:0031224,GO:0036211,GO:0043170,GO:0043412,GO:0043413,GO:0044237,GO:0044238,GO:0044260,GO:0044267,GO:0044281,GO:0044424,GO:0044425,GO:0044464,GO:0044699,GO:0044710,GO:0044723,GO:0044763,GO:0070085,GO:…
1	32586.c2.g1.i2	393.36	297.17	112.19	149.79	0.440072	1	-1.95417	0.0010724	0.676689	1	STAD5_ARATH	95.187	1.33e-126	Stearoyl-[acyl-carrier-protein] 9-desaturase 5, chloroplastic	XP_013661924.1	97.326	2.48e-128	AT3G02630.1	95.213	5.03e-127	Plant stearoyl-acyl-carrier-protein desaturase family protein
1	32586.c2.g2.i1	82.09	57.31	10.98	17.03	0.315494	1	-2.8682	7e-05	0.877984	1	STAD1_ARATH	95.431	6.76e-141	Stearoyl-[acyl-carrier-protein] 9-desaturase 1, chloroplastic	XP_010453781.1	98.477	1.22e-143	AT5G16240.1	95.431	9.32e-141	Plant stearoyl-acyl-carrier-protein desaturase family protein
1	32593.c0.g1.i2	10.46	1.17	3.66	3.39	-2.23561	0.00522681	1.0461	0.654537	0.149673	1	PLGG1_ARATH	93.58	0	Plastidal glycolate/glycerate translocator 1, chloroplastic	Q9FVQ4.1	93.58	0	AT1G32080.1	93.592	0	membrane protein
1	32600.c0.g1.i2	31.63	0.21	0.47	0.4	-6.24842	1.73e-11	0.51154	1	0.0692497	1	RIR2C_ARATH	96.405	0	Ribonucleoside-diphosphate reductase small chain C	ESQ32773.1	97.049	0	AT3G27060.1	96.405	0	Ferritin/ribonucleotide reductase-like family protein				ENOG410YED8	ath:AT5G13180	GO:0003674,GO:0003824,GO:0004802,GO:0005488,GO:0005575,GO:0005975,GO:0006950,GO:0006970,GO:0008150,GO:0008152,GO:0009058,GO:0009507,GO:0009526,GO:0009532,GO:0009536,GO:0009570,GO:0009628,GO:0009651,GO:0009941,GO:0010035,GO:0010038,GO:0016051,GO:0016740,GO:0016744,GO:0019253,GO:0019685,GO:0031967,GO:0031975,GO:0042221,GO:0043167,GO:0043169,GO:0043226,GO:0043227,GO:0043229,GO:0043231,GO:0044238,GO:…
1	32602.c0.g1.i3	10.12	0.16	0.15	0.08	-5.03039	8.66e-09	-0.625763	1	-0.668824	1	CCA11_ARATH	83.851	0	Cyclin-A1-1	EFH70238.1	85.95	0	AT1G44110.1	83.711	0	Cyclin A1;1				ENOG410YCQU	ath:AT5G46880	GO:0000166,GO:0000287,GO:0003674,GO:0003824,GO:0004743,GO:0005488,GO:0005524,GO:0005575,GO:0005737,GO:0005829,GO:0005975,GO:0006082,GO:0006090,GO:0006091,GO:0006096,GO:0006139,GO:0006163,GO:0006165,GO:0006725,GO:0006732,GO:0006733,GO:0006753,GO:0006757,GO:0006793,GO:0006796,GO:0006807,GO:0008150,GO:0008152,GO:0009056,GO:0009117,GO:0009123,GO:0009126,GO:0009132,GO:0009135,GO:0009141,GO:0009144,GO:…
1	32605.c0.g1.i4	15.99	5.07	1.08	1.17	-0.735083	1	-2.72052	0.000689668	0.367051	1	CBSX2_ARATH	90.086	5.9e-133	CBS domain-containing protein CBSX2, chloroplastic	EFH45432.1	89.177	8.73e-133	AT4G34120.1	90.086	8.15e-133	Cystathionine beta-synthase (CBS) family protein				ENOG410Z7Z7	ath:AT4G36680
1	32616.c0.g1.i4	9.8	2.32	0.14	0.17	-1.22188	0.36435	-4.43477	3.13e-05	0.474492	1					EOA13747.1	86.972	8.1e-124	AT5G59350.1	81.495	2.35e-109	transmembrane protein
1	32634.c0.g1.i1	7.35	0.94	0	0	-1.89508	0.520536	-6.64948	0.0221914	0	1	TIP11_ARATH	98.406	1.13e-173	Aquaporin TIP1-1	XP_010505228.1	98.805	6.7e-172	AT2G36830.1	98.413	1.13e-173	gamma tonoplast intrinsic protein						GO:0003674,GO:0005488,GO:0005515,GO:0005575,GO:0005622,GO:0005737,GO:0005768,GO:0005769,GO:0005770,GO:0005771,GO:0005886,GO:0006605,GO:0006623,GO:0006810,GO:0006886,GO:0007034,GO:0008104,GO:0008150,GO:0010008,GO:0015031,GO:0015833,GO:0016020,GO:0016197,GO:0031090,GO:0031410,GO:0031901,GO:0031982,GO:0032182,GO:0032509,GO:0032511,GO:0033036,GO:0033365,GO:0034613,GO:0042886,GO:0043130,GO:0043226,GO:…
1	32634.c1.g2.i4	362.61	127.17	0.56	0.37	-0.652834	1	-8.16845	9.05e-10	-0.396537	1	TIP12_ARATH	92.49	6.54e-135	Aquaporin TIP1-2	XP_010425366.1	97.628	1.43e-139	AT3G26520.1	92.52	2.6e-135	tonoplast intrinsic protein 2						GO:0001522,GO:0003674,GO:0003676,GO:0003723,GO:0003824,GO:0005488,GO:0006139,GO:0006725,GO:0006807,GO:0008150,GO:0008152,GO:0009451,GO:0009982,GO:0009987,GO:0016070,GO:0016853,GO:0016866,GO:0034641,GO:0043170,GO:0043412,GO:0044237,GO:0044238,GO:0044260,GO:0046483,GO:0071704,GO:0090304,GO:0097159,GO:1901360,GO:1901363
1	32634.c2.g1.i1	104.04	0.27	0.07	0.15	-7.61386	1.68e-11	-2.26065	1	1.12283	1	TIP11_ARATH	96.813	5.91e-161	Aquaporin TIP1-1	XP_010505228.1	98.008	8.48e-160	AT2G36830.1	96.825	5.95e-161	gamma tonoplast intrinsic protein						GO:0000166,GO:0003674,GO:0003824,GO:0004672,GO:0004674,GO:0005488,GO:0005524,GO:0005575,GO:0005634,GO:0005737,GO:0006464,GO:0006468,GO:0006793,GO:0006796,GO:0006807,GO:0008150,GO:0008152,GO:0008360,GO:0009987,GO:0016301,GO:0016310,GO:0016740,GO:0016772,GO:0016773,GO:0017076,GO:0018105,GO:0018193,GO:0018209,GO:0019538,GO:0022603,GO:0022604,GO:0030554,GO:0032553,GO:0032555,GO:0032559,GO:0035639,GO:…
1	32639.c1.g3.i1	136.66	53.16	0.57	1.8	-0.589654	1	-6.94274	7.01e-11	1.82304	1	EXPA1_ARATH	79.252	8.25e-143	Expansin-A1	AQX44113.1	68.367	2.09e-115	AT1G69530.2	79.322	8.31e-143	expansin A1						GO:0003674,GO:0003824,GO:0005575,GO:0005773,GO:0005886,GO:0009507,GO:0009526,GO:0009528,GO:0009535,GO:0009536,GO:0009706,GO:0009941,GO:0016020,GO:0016491,GO:0019866,GO:0031090,GO:0031967,GO:0031969,GO:0031975,GO:0034357,GO:0042170,GO:0042651,GO:0043226,GO:0043227,GO:0043229,GO:0043231,GO:0044422,GO:0044424,GO:0044434,GO:0044435,GO:0044436,GO:0044444,GO:0044446,GO:0044464,GO:0055035
1	32639.c1.g4.i1	75.32	2.26	0.07	0.18	-4.23012	8.2e-10	-5.27254	1.07e-07	1.37542	1	EXPA5_ARATH	93.333	3.16e-153	Expansin-A5	Q38864.1	93.333	5.26e-151	AT3G29030.1	93.359	3.18e-153	expansin A5				COG0484	ath:AT5G49060`KO:K09518	GO:0000151,GO:0003674,GO:0003824,GO:0004842,GO:0005575,GO:0005634,GO:0006464,GO:0006508,GO:0006511,GO:0006807,GO:0007165,GO:0008150,GO:0008152,GO:0009056,GO:0009057,GO:0009719,GO:0009725,GO:0009733,GO:0009734,GO:0009755,GO:0009791,GO:0009987,GO:0010033,GO:0010311,GO:0010498,GO:0016567,GO:0016740,GO:0019005,GO:0019538,GO:0019787,GO:0019941,GO:0030163,GO:0031146,GO:0031461,GO:0032446,GO:0032501,GO:…
1	32639.c3.g1.i1	53.08	28.73	0	3.72	0.0113578	1	-8.17961	1.76e-08	4.92874	1	EXP15_ARATH	97.03	6.98e-60	Expansin-A15	CDY45181.1	99.01	1.31e-59	AT2G03090.1	97.03	9.59e-60	expansin A15
1	32650.c2.g1.i12	6.93	0.03	0.03	0.04	-6.33463	0.000110231	-0.298454	1	0.198849	1																	GO:0003674,GO:0003676,GO:0003677,GO:0005488,GO:0005575,GO:0005634,GO:0006139,GO:0006259,GO:0006260,GO:0006281,GO:0006310,GO:0006725,GO:0006807,GO:0006950,GO:0006974,GO:0008150,GO:0008152,GO:0009058,GO:0009059,GO:0009987,GO:0033554,GO:0034641,GO:0034645,GO:0043170,GO:0043226,GO:0043227,GO:0043229,GO:0043231,GO:0044237,GO:0044238,GO:0044249,GO:0044260,GO:0044424,GO:0044464,GO:0046483,GO:0050896,GO:…
1	32654.c1.g1.i1	33.01	1.63	0	0.11	-3.56425	0.000270056	-7.18406	0.00112888	3.29327	1	TCP21_ARATH	71.564	1.21e-63	Transcription factor TCP21	XP_010491463.1	66.96	2.83e-67	AT5G08330.1	71.564	1.66e-63	TCP family transcription factor				ENOG410Y65V	ath:ArthMp102	GO:0003674,GO:0003676,GO:0003824,GO:0003964,GO:0004175,GO:0004190,GO:0004518,GO:0004519,GO:0005488,GO:0006139,GO:0006259,GO:0006310,GO:0006725,GO:0006807,GO:0008150,GO:0008152,GO:0008233,GO:0008270,GO:0009987,GO:0015074,GO:0016740,GO:0016772,GO:0016779,GO:0016787,GO:0016788,GO:0034061,GO:0034641,GO:0043167,GO:0043169,GO:0043170,GO:0044237,GO:0044238,GO:0044260,GO:0046483,GO:0046872,GO:0046914,GO:…
1	32660.c1.g1.i2	81.5	0.08	0.63	1.2	-8.70514	1.78e-15	2.0546	1	1.14521	1	ERLL1_ARATH	73.81	9.74e-38	pEARLI1-like lipid transfer protein 1	XP_010458633.1	98.81	1.4e-48	AT1G12090.1	97.647	2.05e-50	extensin-like protein	PF03816.13					GO:0003674,GO:0003824,GO:0005488,GO:0006508,GO:0006511,GO:0006807,GO:0006950,GO:0006952,GO:0008150,GO:0008152,GO:0009056,GO:0009057,GO:0009987,GO:0010498,GO:0010941,GO:0016740,GO:0019538,GO:0019941,GO:0030163,GO:0043067,GO:0043161,GO:0043167,GO:0043169,GO:0043170,GO:0043632,GO:0044237,GO:0044238,GO:0044248,GO:0044260,GO:0044265,GO:0046872,GO:0050789,GO:0050794,GO:0050896,GO:0051603,GO:0065007,GO:…
1	32660.c1.g2.i1	327.27	1.6	3.34	3.88	-6.4077	4.12e-07	0.459504	1	0.229622	1															ENOG4111UHX	ath:AT2G22640`KO:K05752	GO:0000975,GO:0001067,GO:0001071,GO:0003674,GO:0003676,GO:0003677,GO:0003700,GO:0005488,GO:0005575,GO:0005634,GO:0006139,GO:0006351,GO:0006355,GO:0006725,GO:0006807,GO:0006950,GO:0006952,GO:0008150,GO:0008152,GO:0009058,GO:0009059,GO:0009605,GO:0009607,GO:0009617,GO:0009889,GO:0009987,GO:0010468,GO:0010556,GO:0016070,GO:0018130,GO:0019219,GO:0019222,GO:0019438,GO:0031323,GO:0031326,GO:0032774,GO:…
1	32660.c1.g3.i1	108.36	0.45	0.04	0.18	-7.03545	2.55e-12	-3.50169	0.449905	1.89352	1	ERLL3_ARATH	74.359	5.6e-34	pEARLI1-like lipid transfer protein 3	KFK43474.1	94.937	2.56e-40	AT1G12090.1	88.75	1.63e-39	extensin-like protein			ExpAA=139.64^PredHel=6^Topology=o15-37i58-80o106-128i141-163o167-189i196-218o	COG3158	ath:AT1G70300`KO:K03549	GO:0003674,GO:0005488,GO:0008270,GO:0043167,GO:0043169,GO:0046872,GO:0046914
1	32673.c3.g4.i2	114.33	9.69	6.45	4.95	-2.73943	0.0013072	-1.10217	0.762675	-0.135274	1
1	32673.c3.g7.i1	1799.16	74.9	23.71	21.14	-3.77894	2.71e-06	-2.12168	0.0310365	-0.0314589	1												PF01250.16
1	32682.c0.g2.i3	49.82	0.39	0.08	0.04	-6.2371	2.42e-11	-2.75387	0.196125	-0.641851	1	ESM1_ARATH	70.027	0	GDSL esterase/lipase ESM1	XP_010465313.1	74.603	0	AT3G14210.1	70.027	0	GDSL-like lipase/acylhydrolase superfamily protein
1	32685.c0.g1.i2	39.16	29.43	0.24	0.12	0.446681	1	-7.34597	1.63e-11	-0.696187	1	PTR33_ARATH	94.484	0	Protein NRT1/ PTR FAMILY 6.4	XP_010466420.1	95.722	0	AT3G21670.1	94.484	0	Major facilitator superfamily protein						GO:0003674,GO:0003676,GO:0003677,GO:0005488,GO:0005575,GO:0005634,GO:0043167,GO:0043169,GO:0043226,GO:0043227,GO:0043229,GO:0043231,GO:0044424,GO:0044464,GO:0046872,GO:0097159,GO:1901363
1	32689.c4.g1.i1	16.13	0.42	3.34	3.46	-4.32342	3.81e-08	2.41257	0.0123251	0.379341	1					XP_006299775.2	75.152	1.28e-68	AT2G17972.1	71.875	4.54e-67	transmembrane protein
1	32700.c1.g1.i2	267.95	0.16	0.11	0.05	-9.66115	1.37e-23	-0.858405	1	-0.553224	1												PF05659.10		ExpAA=113.14^PredHel=5^Topology=o513-535i564-586o624-646i686-703o718-735i	ENOG410XNV4	ath:AT3G03305
1	32700.c1.g2.i1	121.11	0.04	0.05	0.15	-10.1069	4.21e-18	-0.30996	1	1.53067	1					KFK28029.1	72.222	5.17e-12	AT5G63085.1	53.846	1.55e-08	Plant thionin family protein	PF14244.5
1	32700.c2.g1.i2	30.38	1.91	0.46	0.17	-3.17487	6.49e-05	-2.54085	0.0868776	-1.11352	1
1	32705.c0.g1.i2	43.85	0.16	0.18	0.29	-7.04024	4.96e-13	-0.371547	1	0.934838	1	LIRP1_ARATH	90.196	1.51e-31	Light-regulated protein 1, chloroplastic {ECO:0000303|PubMed:8932388}	EFH51596.1	90.566	4.74e-33	AT3G26740.1	90.196	1.56e-31	CCR-like protein	PF14223.5			COG5434		GO:0006139,GO:0006351,GO:0006355,GO:0006725,GO:0006807,GO:0008150,GO:0008152,GO:0009058,GO:0009059,GO:0009889,GO:0009987,GO:0010468,GO:0010556,GO:0016070,GO:0018130,GO:0019219,GO:0019222,GO:0019438,GO:0031323,GO:0031326,GO:0032774,GO:0034641,GO:0034645,GO:0034654,GO:0043170,GO:0044237,GO:0044238,GO:0044249,GO:0044260,GO:0044271,GO:0046483,GO:0050789,GO:0050794,GO:0051171,GO:0051252,GO:0060255,GO:…
1	32706.c0.g1.i2	98.74	9.76	5.9	5.4	-2.46803	0.000192368	-1.25214	0.236011	0.104521	1	FK151_ARATH	96.875	5.61e-86	Peptidyl-prolyl cis-trans isomerase FKBP15-1	Q38935.2	96.875	9.36e-84	AT3G25220.1	96.899	1.66e-86	FK506-binding protein 15 kD-1
1	32706.c0.g2.i3	146.74	8.84	3.35	2.53	-3.20982	8.4e-07	-1.90829	0.0162115	-0.206105	1	FK151_ARATH	97.71	8.29e-90	Peptidyl-prolyl cis-trans isomerase FKBP15-1	Q38935.2	97.71	1.38e-87	AT3G25220.1	97.727	8.33e-90	FK506-binding protein 15 kD-1
1	32712.c0.g1.i7	111.51	11.11	0.14	0.81	-2.33446	0.274184	-6.76027	4.49e-06	2.60363	1	AGP31_ARATH	49.618	5.71e-30	Non-classical arabinogalactan protein 31 {ECO:0000303|PubMed:17885091}	XP_010509721.1	85.714	3.45e-75	AT2G34700.1	86.154	5.98e-76	Pollen Ole e 1 allergen and extensin family protein
1	32715.c0.g1.i6	73.49	3.31	0.12	0.03	-3.59769	0.0100611	-5.05895	0.00784181	-1.4438	1	VITH1_ARATH	94.5	2e-124	Vacuolar iron transporter homolog 1	ESQ34680.1	83.333	6.43e-123	AT1G21140.1	94.527	1.64e-124	Vacuolar iron transporter (VIT) family protein
1	32715.c1.g1.i1	18.55	8.93	0	0.05	-0.142892	1	-9.03827	6.25e-07	2.01349	1	VITH2_ARATH	91.414	6.6e-113	Vacuolar iron transporter homolog 2	XP_010428749.1	93.939	1.56e-113	AT1G76800.1	91.457	3.92e-113	Vacuolar iron transporter (VIT) family protein						GO:0001101,GO:0003674,GO:0003824,GO:0005575,GO:0005794,GO:0006629,GO:0006950,GO:0006952,GO:0006970,GO:0008146,GO:0008150,GO:0008152,GO:0008202,GO:0009628,GO:0009651,GO:0009751,GO:0010033,GO:0010817,GO:0014070,GO:0016128,GO:0016131,GO:0016740,GO:0016782,GO:0042221,GO:0042445,GO:0043226,GO:0043227,GO:0043229,GO:0043231,GO:0044238,GO:0044424,GO:0044444,GO:0044464,GO:0044699,GO:0044710,GO:0050896,GO:…
1	32722.c0.g1.i6	788.94	37.69	0.44	0.41	-3.41977	0.00663133	-6.76576	1.27e-05	0.0515577	1															COG0515	ath:AT5G26751`KO:K00924	GO:0000166,GO:0003674,GO:0003824,GO:0005488,GO:0005515,GO:0005524,GO:0005575,GO:0005783,GO:0005829,GO:0008104,GO:0008150,GO:0009987,GO:0016049,GO:0016462,GO:0016787,GO:0016817,GO:0016818,GO:0016887,GO:0017076,GO:0017111,GO:0030554,GO:0032502,GO:0032553,GO:0032555,GO:0032559,GO:0033036,GO:0034613,GO:0035639,GO:0036094,GO:0040007,GO:0043167,GO:0043168,GO:0043226,GO:0043227,GO:0043229,GO:0043231,GO:…
1	32722.c0.g2.i4	688.98	10.58	0.4	0.22	-5.05682	8.04e-06	-5.05101	0.00177053	-0.670608	1					OAP07414.1	79.762	3.45e-29
1	32729.c0.g1.i1	62.52	3.35	0.14	0.13	-3.26771	0.00877018	-4.69915	0.059053	0.201576	1					XP_009103264.1	62.092	1.44e-43	AT1G22110.3	61.074	1.9e-32	structural constituent of ribosome				ENOG410XQQ0	ath:AT5G10790`KO:K11366
1	32729.c0.g2.i1	16.92	0	0.22	0	-7.28093	0.000168633	1.72544	1	-1.77849	1																	GO:0001101,GO:0003674,GO:0003824,GO:0004842,GO:0005488,GO:0005575,GO:0005789,GO:0006464,GO:0006508,GO:0006511,GO:0006807,GO:0006950,GO:0006970,GO:0008150,GO:0008152,GO:0009056,GO:0009057,GO:0009266,GO:0009409,GO:0009414,GO:0009415,GO:0009611,GO:0009628,GO:0009719,GO:0009723,GO:0009725,GO:0009987,GO:0010033,GO:0010035,GO:0010498,GO:0016020,GO:0016021,GO:0016567,GO:0016740,GO:0019538,GO:0019787,GO:…
1	32731.c0.g1.i2	38.76	7.58	2.04	1.13	-1.42082	0.0592265	-2.45381	0.0123108	-0.534642	1	MTP11_ARATH	94.845	0	Metal tolerance protein 11	EFH38708.1	96.094	0	AT2G39450.1	94.845	0	Cation efflux family protein
1	32733.c1.g1.i6	19.61	0.37	0.02	0.02	-4.78952	6.18e-09	-4.14243	0.055722	0.191826	1	GAT12_ARATH	71.923	4.55e-111	GATA transcription factor 12 {ECO:0000303|PubMed:15084732}	XP_020877868.1	73.359	2.95e-120	AT5G25830.1	71.923	6.28e-111	GATA transcription factor 12				COG5021	ath:AT1G70320`KO:K10592
1	32739.c0.g1.i3	234.65	24.67	1.77	1.91	-2.43336	0.000360402	-4.29306	1.82e-10	0.347142	1	S6PD_MALDO	70.358	5.17e-162	NADP-dependent D-sorbitol-6-phosphate dehydrogenase	EFH56629.1	97.411	0	AT2G21250.1	95.161	0	NAD(P)-linked oxidoreductase superfamily protein				COG0389	ath:AT5G44750`KO:K03515
1	32748.c2.g1.i2	42.72	5.26	9.56	5.98	-2.03777	0.0494743	0.197691	1	-0.369538	1	AHP1_ARATH	58.333	9.37e-21	Histidine-containing phosphotransfer protein 1	ESQ47714.1	58.333	1.39e-18	AT3G21510.1	58.333	1.28e-20	histidine-containing phosphotransmitter 1
1	32752.c3.g1.i5	12.02	7.19	0	0	0.20081	1	-7.81696	1.8e-05	0	1	NAC79_ARATH	76.163	3.23e-89	NAC domain-containing protein 79 {ECO:0000303|PubMed:15029955}	CDY40775.1	80.233	9.69e-90	AT5G07680.2	76.163	2.87e-89	NAC domain containing protein 80						GO:0000166,GO:0001882,GO:0001883,GO:0003674,GO:0003824,GO:0003924,GO:0005488,GO:0005525,GO:0005575,GO:0005737,GO:0005886,GO:0007165,GO:0007264,GO:0008150,GO:0009987,GO:0016020,GO:0016462,GO:0016787,GO:0016817,GO:0016818,GO:0017076,GO:0017111,GO:0019001,GO:0032549,GO:0032550,GO:0032553,GO:0032555,GO:0032561,GO:0035556,GO:0035639,GO:0036094,GO:0043167,GO:0043168,GO:0044424,GO:0044464,GO:0050789,GO:…
1	32756.c1.g1.i1	54.6	13.41	0.11	0.16	-1.12833	1	-7.04093	1.01e-06	0.639968	1	TT16_ARATH	82.143	1.3e-136	Protein TRANSPARENT TESTA 16	XP_020876103.1	81.648	2.97e-140	AT5G23260.4	80.451	9.99e-141	K-box region and MADS-box transcription factor family protein
1	32756.c2.g6.i1	15.6	5.15	1.01	1.07	-0.837269	1	-2.75748	0.029454	0.404472	1					CDY55313.1	68.056	2.96e-10
1	32761.c3.g2.i1	11.05	1	2.16	2.04	-2.49475	0.00682983	0.573487	1	0.132813	1	HIP34_ARATH	68.571	1.75e-30	Heavy metal-associated isoprenylated plant protein 34 {ECO:0000303|PubMed:21072340, ECO:0000303|PubMed:23368984}	EOA30233.1	72.857	1.22e-30	AT3G05220.1	68.571	2.35e-30	Heavy metal transport/detoxification superfamily protein
1	32762.c0.g2.i2	54.5	12.63	3.87	3.85	-1.2963	0.293866	-2.20266	0.0183731	0.23183	1					EOA21716.1	84.848	9.95e-09	AT5G14030.5	85.714	1.06e-08	translocon-associated protein beta (TRAPB) family protein
1	32763.c0.g1.i3	7.58	0.03	0.2	0.26	-6.9374	4.7e-08	1.99772	1	0.618098	1	CP26B_ARATH	88.261	9.92e-138	Peptidyl-prolyl cis-trans isomerase CYP26-2, chloroplastic	F4HTT6.1	88.261	1.65e-135	AT1G74070.1	88.312	9.99e-138	Cyclophilin-like peptidyl-prolyl cis-trans isomerase family protein	PF13966.5					GO:0000166,GO:0001882,GO:0001883,GO:0003674,GO:0003824,GO:0004845,GO:0004849,GO:0005488,GO:0005524,GO:0005525,GO:0005575,GO:0005829,GO:0006139,GO:0006206,GO:0006213,GO:0006220,GO:0006221,GO:0006222,GO:0006241,GO:0006725,GO:0006753,GO:0006793,GO:0006796,GO:0006807,GO:0008150,GO:0008152,GO:0008655,GO:0009058,GO:0009112,GO:0009116,GO:0009117,GO:0009119,GO:0009123,GO:0009124,GO:0009129,GO:0009130,GO:…
1	32764.c0.g3.i1	37.1	4.65	0.86	1.14	-2.04879	0.00501707	-2.95192	0.000405361	0.630761	1	VAB_ARATH	67.442	2.32e-54	VAN3-binding protein {ECO:0000303|PubMed:19363154}	BAD42957.1	97.015	1.03e-93	AT4G14740.3	97.037	6.18e-96	auxin canalization protein (DUF828)				COG0148	ath:AT1G74030`KO:K01689
1	32765.c2.g3.i1	12.16	4.49	0.48	0.2	-0.589207	1	-3.59824	0.000559476	-1.05626	1	GATL8_ARATH	90.769	4.36e-84	Probable galacturonosyltransferase-like 8	EOA37428.1	93.077	2.63e-84	AT1G24170.1	90.769	5.99e-84	Nucleotide-diphospho-sugar transferases superfamily protein	PF00078.26
1	32765.c2.g6.i2	17.3	1.12	0.15	0.17	-3.01454	5.58e-05	-3.23892	0.0129022	0.250274	1	GATL8_ARATH	97.131	5.47e-178	Probable galacturonosyltransferase-like 8	EFH69588.1	97.951	1.13e-177	AT1G24170.1	97.143	5.5e-178	Nucleotide-diphospho-sugar transferases superfamily protein
1	32765.c2.g8.i1	43.89	24.34	3.83	5.73	-0.019622	1	-3.02283	0.0248507	0.794572	1	GATL6_ARATH	95.455	2.35e-61	Probable galacturonosyltransferase-like 6	AAM13982.1	95.455	1.27e-60	AT4G02130.3	95.455	3.22e-61	galacturonosyltransferase 6	PF02434.15
1	32766.c3.g2.i1	9.36	4.7	0.37	0.4	-0.108745	1	-4.00233	0.00130015	0.244367	1	KSG3_ARATH	90.476	1.75e-33	Shaggy-related protein kinase gamma {ECO:0000303|PubMed:7509023}	EFH58697.1	93.651	2.22e-32	AT3G05840.2	90.476	2.36e-33	Protein kinase superfamily protein
1	32767.c0.g3.i5	19.75	0.3	0.19	0.18	-5.13423	3.62e-11	-1.10585	1	0.081203	1	STR14_ARATH	68.067	1.35e-105	Rhodanese-like domain-containing protein 14, chloroplastic	XP_018470972.1	84.127	1.61e-105	AT4G27700.1	68.067	1.87e-105	Rhodanese/Cell cycle control phosphatase superfamily protein				ENOG410XS5N	ath:AT5G37370`KO:K12850	GO:0005575,GO:0005634,GO:0043226,GO:0043227,GO:0043229,GO:0043231,GO:0044424,GO:0044464
1	32771.c0.g1.i5	65.18	8.75	8.01	7.87	-2.08343	0.0102834	-0.642381	1	0.247541	1	MSH4_ARATH	93.529	0	DNA mismatch repair protein MSH4	EFH46366.1	93.651	0	AT4G17380.1	93.537	0	MUTS-like protein 4
1	32787.c1.g1.i3	99.95	10.72	5.34	6.36	-2.33178	0.000636408	-1.48798	0.119321	0.497149	1	14339_ARATH	97.2	1.55e-178	14-3-3-like protein GF14 mu	AEC10143.1	97.59	3.56e-178	AT2G42590.2	97.59	2.95e-180	general regulatory factor 9
1	32789.c1.g1.i1	15.19	0.56	0.31	0.31	-3.77062	0.00180859	-1.24038	1	0.14526	1	LUL4_ARATH	87.5	6.45e-172	Probable E3 ubiquitin-protein ligase LUL4	XP_020889250.1	85.902	1.45e-177	AT3G06140.1	87.5	8.92e-172	RING/U-box superfamily protein				ENOG41114WX	ath:AT4G30790`KO:K08330
1	32795.c0.g1.i3	35.81	7.5	2.74	3.56	-1.34322	0.230202	-1.98144	0.0195195	0.615399	1	TRPA2_ARATH	83.077	1.06e-98	Tryptophan synthase alpha chain, chloroplastic	AAM65526.1	83.59	9.57e-98	AT3G54640.1	83.077	1.46e-98	tryptophan synthase alpha chain
1	32797.c1.g3.i1	8.81	0.12	0.51	0.55	-5.05255	0.00102548	1.32409	1	0.249963	1					EFH41968.1	82.143	6.39e-21	AT5G49100.1	80.357	1.21e-21	vitellogenin-like protein				ENOG410YPDW	ath:AT1G10715	GO:0005575,GO:0006810,GO:0008104,GO:0008150,GO:0009507,GO:0009526,GO:0009528,GO:0009532,GO:0009534,GO:0009535,GO:0009536,GO:0009570,GO:0009579,GO:0009706,GO:0009941,GO:0015031,GO:0015833,GO:0016020,GO:0019866,GO:0031090,GO:0031967,GO:0031969,GO:0031975,GO:0031976,GO:0031984,GO:0032991,GO:0033036,GO:0034357,GO:0042170,GO:0042651,GO:0042886,GO:0043226,GO:0043227,GO:0043229,GO:0043231,GO:0043234,GO:…
1	32798.c2.g1.i1	12.36	0.39	0.42	0	-3.97707	0.00187126	-0.33771	1	-3.04861	1					EFH66621.1	60.577	9.57e-15	AT1G19990.1	71.875	1.2e-14	nucleolin
1	32801.c0.g2.i1	18.17	0.52	0.24	0.32	-4.27316	5.28e-07	-1.54033	0.952289	0.615065	1	TBL35_ARATH	84.691	0	Protein trichome birefringence-like 35	XP_010490531.1	87.296	0	AT5G01620.2	84.74	0	TRICHOME BIREFRINGENCE-LIKE 35
1	32802.c2.g1.i3	70.83	1.01	0.35	0.55	-5.29072	8.64e-09	-1.96563	0.653763	0.82733	1	GUN4C_ARATH	92.806	2.02e-94	Tetrapyrrole-binding protein, chloroplastic	AFX68810.1	83.333	1.45e-95	AT3G59400.1	92.806	2.79e-94	protein GENOMES UNCOUPLED 4						GO:0000975,GO:0000981,GO:0000988,GO:0000989,GO:0001067,GO:0001071,GO:0001076,GO:0001134,GO:0001135,GO:0002218,GO:0002253,GO:0002376,GO:0002682,GO:0002684,GO:0003674,GO:0003676,GO:0003677,GO:0003700,GO:0005488,GO:0005575,GO:0005634,GO:0005681,GO:0006139,GO:0006259,GO:0006281,GO:0006351,GO:0006355,GO:0006357,GO:0006396,GO:0006397,GO:0006725,GO:0006807,GO:0006950,GO:0006952,GO:0006955,GO:0006974,GO:…
1	32805.c0.g1.i7	555.35	362.6	120.77	136.99	0.245061	1	-2.14229	0.000158229	0.424943	1	NLTL5_ARATH	79.71	1.3e-62	Non-specific lipid-transfer protein-like protein At5g64080	EFH42852.1	82.734	8.71e-66	AT5G64080.1	79.71	1.79e-62	Bifunctional inhibitor/lipid-transfer protein/seed storage 2S albumin superfamily protein	PF00078.26
1	32812.c0.g1.i1	28.01	0.19	0	0.05	-6.31143	2.33e-13	-4.84092	0.183511	2.778	1	WAT1_ARATH	92.64	0	Protein WALLS ARE THIN 1	XP_010471663.1	93.909	0	AT1G75500.2	92.658	0	Walls Are Thin 1
1	32818.c3.g1.i2	229.91	6.96	1.59	1.66	-4.15552	2.14e-06	-2.51832	0.0616862	0.287212	1	LSH6_ARATH	94.949	4e-120	Protein LIGHT-DEPENDENT SHORT HYPOCOTYLS 6	EFH68638.1	94.949	4.12e-120	AT1G07090.1	94.975	2.36e-120	LIGHT-DEPENDENT SHORT HYPOCOTYLS-like protein (DUF640)	PF12833.6
1	32818.c3.g2.i5	23.42	1.22	0.09	0.08	-3.34309	0.00683292	-4.04852	0.0157732	0.265936	1	LSH9_ARATH	92.8	1.37e-82	Protein LIGHT-DEPENDENT SHORT HYPOCOTYLS 9	XP_018458082.1	93.6	7.26e-81	AT4G18610.1	92.8	1.89e-82	LIGHT-DEPENDENT SHORT HYPOCOTYLS-like protein (DUF640)		sigP:1^25^0.487^YES	ExpAA=42.31^PredHel=2^Topology=i7-27o634-653i	COG0515	ath:AT4G28650
1	32818.c3.g3.i1	46.79	0.28	0.12	0.04	-6.37834	1.58e-11	-1.6527	1	-1.0541	1	LSH5_ARATH	94.375	4.48e-99	Protein LIGHT-DEPENDENT SHORT HYPOCOTYLS 5	EFH42530.1	95.57	5.99e-97	AT5G58500.1	94.375	6.18e-99	LIGHT-DEPENDENT SHORT HYPOCOTYLS-like protein (DUF640)						GO:0000413,GO:0003674,GO:0003755,GO:0003824,GO:0005575,GO:0005773,GO:0005829,GO:0005886,GO:0006464,GO:0006807,GO:0008150,GO:0008152,GO:0009987,GO:0016020,GO:0016853,GO:0016859,GO:0018193,GO:0018208,GO:0019538,GO:0036211,GO:0043170,GO:0043226,GO:0043227,GO:0043229,GO:0043231,GO:0043412,GO:0044237,GO:0044238,GO:0044260,GO:0044267,GO:0044424,GO:0044444,GO:0044464,GO:0071704,GO:1901564
1	32819.c0.g1.i4	14.35	2.47	3.46	2.67	-1.65383	0.0355243	-0.0376793	1	-0.0886281	1					XP_010467640.1	83.568	2.34e-93	AT2G18245.1	84.112	1.3e-85	alpha/beta-Hydrolases superfamily protein
1	32820.c0.g1.i1	70.98	50.95	6.5	4.2	0.371964	1	-3.46532	5.11e-05	-0.399408	1	PDF2_ARATH	91.803	8.11e-67	Homeobox-leucine zipper protein PROTODERMAL FACTOR 2	Q93V99.1	91.803	1.35e-64	AT4G04890.2	91.803	1.1e-66	protodermal factor 2
1	32821.c1.g1.i5	52	25.77	0.74	0.45	-0.203329	1	-5.54987	1.65e-07	-0.432355	1	AROD5_ARATH	93.072	0	Arogenate dehydratase 5, chloroplastic	EFH48272.1	93.995	0	AT5G22630.1	93.088	0	arogenate dehydratase 5			ExpAA=66.43^PredHel=3^Topology=i58-80o111-133i146-168o			GO:0000139,GO:0003674,GO:0005215,GO:0005338,GO:0005464,GO:0005575,GO:0005768,GO:0005794,GO:0005802,GO:0006810,GO:0006811,GO:0006820,GO:0008150,GO:0008509,GO:0008514,GO:0008643,GO:0015075,GO:0015165,GO:0015291,GO:0015297,GO:0015711,GO:0015780,GO:0015781,GO:0015790,GO:0015931,GO:0015932,GO:0016020,GO:0016021,GO:0022804,GO:0022857,GO:0022891,GO:0022892,GO:0031090,GO:0031224,GO:0031410,GO:0031982,GO:…
1	32825.c0.g1.i4	18.81	4.92	1.84	1.19	-1.06409	0.613992	-1.95628	0.0354779	-0.391178	1	ACP4_ARATH	89.781	4.32e-78	Acyl carrier protein 4, chloroplastic	KFK28999.1	89.474	3.7e-76	AT4G25050.1	89.855	3.2e-78	acyl carrier protein 4				COG4642	ath:AT1G60890`KO:K00889	GO:0003674,GO:0003676,GO:0003824,GO:0003964,GO:0004175,GO:0004190,GO:0004518,GO:0004519,GO:0005488,GO:0006139,GO:0006259,GO:0006725,GO:0006807,GO:0008150,GO:0008152,GO:0008233,GO:0008270,GO:0009987,GO:0015074,GO:0016740,GO:0016772,GO:0016779,GO:0016787,GO:0016788,GO:0034061,GO:0034641,GO:0043167,GO:0043169,GO:0043170,GO:0044237,GO:0044238,GO:0044260,GO:0046483,GO:0046872,GO:0046914,GO:0070001,GO:…
1	32827.c2.g1.i5	32.05	4.78	0.82	0.54	-1.82211	0.00802249	-3.07416	4.91e-05	-0.392575	1	MET1_ARATH	92.429	0	Protein MET1, chloroplastic {ECO:0000303|PubMed:25587003}	XP_010462398.1	92.188	0	AT1G55480.1	92.453	0	protein containing PDZ domain a K-box domain and a TPR region
1	32828.c3.g1.i2	221.91	30.02	27.65	22.31	-2.06887	0.00686683	-0.62481	1	-0.0786931	1	RLA21_ARATH	93.043	2.99e-32	60S acidic ribosomal protein P2-1	ESQ51233.1	93.043	1.96e-30	AT2G27720.1	93.103	3.01e-32	60S acidic ribosomal protein family				COG2124	ath:AT1G67110`KO:K10717
1	32828.c3.g3.i1	45.09	0.37	0.11	0	-5.9329	7.75e-10	-1.94785	1	-2.54956	1					XP_011654067.1	89.655	1.76e-08	AT5G53880.1	89.655	1.31e-09	hypothetical protein						GO:0003674,GO:0005488,GO:0005509,GO:0005515,GO:0005575,GO:0005618,GO:0005739,GO:0005773,GO:0005774,GO:0005783,GO:0005789,GO:0005886,GO:0005911,GO:0006457,GO:0008150,GO:0009505,GO:0009506,GO:0009507,GO:0009536,GO:0009987,GO:0016020,GO:0016021,GO:0030054,GO:0030246,GO:0030312,GO:0031090,GO:0031224,GO:0043167,GO:0043169,GO:0043226,GO:0043227,GO:0043229,GO:0043231,GO:0044422,GO:0044424,GO:0044425,GO:…
1	32829.c0.g1.i3	27.76	1.12	0	0.11	-3.79692	0.000429501	-5.1668	0.234993	1.96998	1	SRS6_ARATH	83.803	1.28e-78	Protein SHI RELATED SEQUENCE 6	Q9M2U4.1	83.803	2.14e-76	AT3G54430.1	83.916	1.29e-78	SHI-related sequence 6
1	32836.c2.g1.i4	8.42	0.49	3.22	3.06	-3.07282	0.0056976	2.11851	0.0453908	0.26341	1					XP_022567975.1	97.71	2.05e-159	AT4G20320.6	96.947	2.78e-157	CTP synthase family protein
1	32837.c0.g1.i3	10.19	0.02	0.1	0.13	-7.54687	6.67e-11	1.30834	1	0.561551	1	PANS1_ARATH	80.829	3.13e-96	Protein PATRONUS 1 {ECO:0000303|Ref.5}	EFH59130.1	82.99	3.28e-100	AT3G14190.2	80.711	3.16e-96	hypothetical protein						GO:0005575,GO:0005634,GO:0006950,GO:0006952,GO:0008150,GO:0009605,GO:0009607,GO:0009620,GO:0043207,GO:0043226,GO:0043227,GO:0043229,GO:0043231,GO:0044424,GO:0044464,GO:0050832,GO:0050896,GO:0051704,GO:0051707,GO:0098542
1	32840.c0.g1.i1	50.23	3.28	2.27	0.95	-3.03674	1.46e-05	-1.06607	0.675776	-0.984615	1					ESQ36416.1	85.437	8.35e-93	AT1G05070.1	84.699	7.93e-90	transmembrane protein putative (DUF1068)
1	32850.c1.g1.i2	58.94	9.74	8.3	6.07	-1.65785	0.0279912	-0.815672	0.96697	-0.199612	1					XP_010427600.1	78.218	1.67e-43	AT3G57320.1	74.757	3.13e-42	threonine-tRNA ligase 2
1	32868.c1.g1.i2	26.07	0	0	0	-7.94424	0.000343906	5.13e-15	1	0	1	ESFL2_ARATH	54.651	2.83e-25	EMBRYO SURROUNDING FACTOR 1-like protein 2	XP_019085927.1	54.321	6.98e-25	AT1G10715.1	55.172	2.82e-25	EMBRYO SURROUNDING FACTOR-like protein						GO:0005575,GO:0006810,GO:0006950,GO:0008150,GO:0008152,GO:0009266,GO:0009314,GO:0009408,GO:0009411,GO:0009416,GO:0009521,GO:0009522,GO:0009523,GO:0009535,GO:0009628,GO:0009637,GO:0009639,GO:0009642,GO:0009644,GO:0009889,GO:0009987,GO:0010029,GO:0010030,GO:0010114,GO:0010117,GO:0010218,GO:0010224,GO:0010380,GO:0015979,GO:0016020,GO:0016021,GO:0019222,GO:0031224,GO:0031323,GO:0031326,GO:0032991,GO:…
1	32870.c1.g1.i6	118.4	18.96	44.83	48.94	-1.78078	0.0154906	0.689315	1	0.369428	1	Y4844_ARATH	57.143	1.17e-45	Uncharacterized protein At4g28440	EFH68842.1	90	1.1e-76	AT1G10590.3	84.967	1.46e-78	Nucleic acid-binding OB-fold-like protein	PF07650.16
1	32873.c0.g2.i2	335.38	44.15	27.06	27.57	-2.10744	0.0142459	-1.20239	0.310796	0.270846	1	RL373_ARATH	97.753	5.7e-58	60S ribosomal protein L37-3	CDY52979.1	84.404	1.99e-56	AT3G16080.1	97.753	7.85e-58	Zinc-binding ribosomal protein family protein				ENOG410YD4N	ath:AT1G26850
1	32873.c0.g3.i1	186.48	31.92	21.96	13.02	-1.70428	0.0306556	-1.07175	0.342289	-0.503067	1	RL371_ARATH	96.842	1.09e-61	60S ribosomal protein L37-1	CDY70030.1	86.842	5.34e-60	AT1G15250.2	96.875	1.09e-61	Zinc-binding ribosomal protein family protein						GO:0000166,GO:0000911,GO:0000913,GO:0003674,GO:0003774,GO:0003777,GO:0003824,GO:0005488,GO:0005515,GO:0005524,GO:0005575,GO:0005634,GO:0005694,GO:0005819,GO:0005829,GO:0005871,GO:0005874,GO:0005875,GO:0005886,GO:0006810,GO:0006928,GO:0006996,GO:0007017,GO:0007018,GO:0007097,GO:0008017,GO:0008092,GO:0008150,GO:0009504,GO:0009524,GO:0009526,GO:0009657,GO:0009658,GO:0009902,GO:0009903,GO:0009904,GO:…
1	32873.c0.g5.i2	51.68	6.57	7.5	6.72	-2.1579	0.0092272	-0.290518	1	0.0646361	1	RL372_ARATH	100	1.63e-21	60S ribosomal protein L37-2	AMK47968.1	70	2.87e-20	AT1G52300.1	100	2.24e-21	Zinc-binding ribosomal protein family protein						GO:0001071,GO:0003674,GO:0003700,GO:0005488,GO:0005575,GO:0005634,GO:0006355,GO:0007165,GO:0007602,GO:0008150,GO:0008270,GO:0009314,GO:0009416,GO:0009581,GO:0009582,GO:0009583,GO:0009585,GO:0009605,GO:0009628,GO:0009639,GO:0009889,GO:0009891,GO:0009893,GO:0009987,GO:0010017,GO:0010018,GO:0010218,GO:0010468,GO:0010556,GO:0010557,GO:0010604,GO:0010628,GO:0019219,GO:0019222,GO:0031323,GO:0031325,GO:…
1	32874.c0.g1.i1	140.45	2.67	1.93	2.52	-4.83225	2.37e-13	-1.01288	0.714563	0.617234	1	PSBR_ARATH	94.545	2.84e-28	Photosystem II 10 kDa polypeptide, chloroplastic	XP_010417520.1	96.364	6.78e-27	AT1G79040.1	94.545	3.94e-28	photosystem II subunit R	PF03061.21
1	32882.c0.g1.i3	18.89	0.96	0.2	0.1	-3.44346	1.19e-05	-2.70555	0.0251564	-0.702345	1	TTL1_ARATH	88.83	0	TPR repeat-containing thioredoxin TTL1	EOA39808.1	91.392	0	AT1G53300.1	88.693	0	tetratricopetide-repeat thioredoxin-like 1
1	32883.c0.g1.i1	199.98	1.68	0	1.89	-5.70272	3.93e-06	-2.01957	1	1.97677	1					EFH69788.1	90.196	8.02e-26	AT1G28400.1	90.196	7.12e-28	GATA zinc finger protein				COG0443	ath:AT5G02500`KO:K03283	GO:0003674,GO:0003676,GO:0005488,GO:0008270,GO:0043167,GO:0043169,GO:0046872,GO:0046914,GO:0097159,GO:1901363
[truncated: 121,552 more rows]
