# Supplementary material for: Transcriptomic analysis of seed development in Paysonia auriculata (Brassicaceae) identifies genes involved in hydroxy fatty acid biosynthesis
Source: Front Plant Sci. 2023 Jan 13;13:1079146. doi: 10.3389/fpls.2022.1079146 (PMC9880434; doi:10.3389/fpls.2022.1079146)
Supplement: Supplementary file 4 [file Table_2.xlsx]

## Sheet: Sheet1
	PaFAH12	PfFAH12	PlFAH12	RcFAH12	PaFAD2	PfFAD2	AtFAD2	RcFAD2
PaFAH12 (MT496774)		95.3	95.1	83.5	94.3	93.5	94	86.7
PfFAH12 (AAC32755.1)			97.4	81.7	94.8	94.3	94.5	87.5
PlFAH12 (ABQ01458.1)				81.4	93.2	92.7	93	87.5
RcFAH12 (XP_002528127)					84.2	84.5	83.7	88.6
PaFAD2 (MT496775)						99.5	98.4	90.9
PfFAD2 (AFP21683)							97.9	90.1
AtFAD2 (AT3G12120)								90.6
RcFAD2 (NP_001310648)
	PaFAD3	PfFAD3-1	PfFAD3-2	AtFAD3	RcFAD3
PaFAD3 (MT496776)		98.2	90.2	97.9	65.5
PfFAD3-1 (AWX65624)			90.2	98.7	65.1
PfFAD3-2 (AWX65625)				90.2	62.6
AtFAD3 (AT2G29980)					65.3
RcFAD3 (EEF36775)
	PaKCS18	PfKCS18	AtKCS3
PaKCS18 (MT496777)		93.6	55.3
PfKCS18 (AAK62348)			55
AtKCS3 (AT1G07720)
Pairwise sequence alignment was performed with EMBOSS Needle with PAM250 matrix
Percent of sequence similarities were showed in upper triangle
GenBank accession IDs are listed in parantheses
